# Supplementary material for: DMRT1 is a testis-determining gene in rabbits and is also essential for female fertility
Source: eLife. 2023 Oct 17;12:RP89284. doi: 10.7554/eLife.89284 (PMC10581690; doi:10.7554/eLife.89284)
Supplement: Supplementary file 1. — List of deregulated genes (DEGs) between KO-XY vs Control-XY gonads (sheet 1), KO-XY vs KO-XY gonads (sheet 2), KO-XX vs Control-XX gonads (sheet 3), and Control-XY vs Control-XX gonads (sheet 4). The gene name of DEGs was based on their annotation or human homology (Craig et al., 2012). [file elife-89284-supp1.xlsx]

## Sheet: KO-XY vs Control-XY
Table S1: List of DEGs in DMRT1-/- gonads (XY and XX) compared to control gonads (XY and XX) (adjusted p-value < 0.05 and |log2FC|>1)
KO-XY vs Control-XY
Rabbit gene ID	Gene name	log2FC	FC	adj pValue
ENSOCUG00000017210	NPTX2	-9.21677	0.00168065	7.12544e-255
ENSOCUG00000002566	SHBG	-6.52194	0.0108818	1.21824e-243
ENSOCUG00000024805	COL28A1	-8.18485	0.00343648	9.53641e-220
ENSOCUG00000021430	NEFM	-7.18361	0.00687887	1.82983e-218
ENSOCUG00000023705	TM7SF2	-3.73566	0.075068	3.21497e-177
DTOCUGAMH	AMH	-7.59638	0.00516726	8.8696e-173
ENSOCUG00000033942		-6.27525	0.0129111	2.05991e-155
ENSOCUG00000002909	GRB14	-5.13453	0.0284677	2.08654e-150
ENSOCUG00000015860	KIAA1210	-4.56736	0.0421783	1.22967e-132
ENSOCUG00000005007	KCNE5	-4.83125	0.0351275	2.00978e-127
ENSOCUG00000029219	DHH	-4.29352	0.0509944	7.21375e-125
ENSOCUG00000005244	LRRTM1	3.46228	11.0217	7.89112e-124
ENSOCUG00000021311		-4.47428	0.0449892	1.98534e-121
ENSOCUG00000023697	LRRN1	2.89833	7.45562	3.20078e-120
ENSOCUG00000000271	MAMDC2	2.76697	6.80676	3.89432e-120
ENSOCUG00000014516	CCDC68	-5.15805	0.0280074	7.7338e-115
ENSOCUG00000000670	SLITRK6	-5.15904	0.0279881	1.31415e-114
ENSOCUG00000005190	DHCR24	-3.29484	0.101895	6.85563e-114
ENSOCUG00000006499	MGARP	-5.15179	0.0281291	1.49729e-109
ENSOCUG00000001151	DAPP1	-5.53547	0.0215605	6.97301e-109
DTOCUGHSD3Bbeta	HSD3Bbeta	-11.4307	0.000362246	2.94648e-107
ENSOCUG00000016966	UNC80	5.09223	34.1125	2.52332e-105
ENSOCUG00000000171	GREM2	-3.52265	0.0870117	5.09457e-105
ENSOCUG00000033850		4.47882	22.2976	5.69339e-105
ENSOCUG00000006938	CSDC2	-2.70478	0.153384	1.48248e-103
ENSOCUG00000032261		-5.77196	0.0183007	1.30935e-99
ENSOCUG00000002024	SFTPC	-8.84295	0.00217775	1.49355e-96
DTOCUGRSPO1	RSPO1	3.59165	12.0558	3.78702e-96
DTOCUGFOXL2	FOXL2	8.03809	262.849	3.99834e-95
ENSOCUG00000007492	LMOD1	-3.08143	0.11814	1.07706e-93
ENSOCUG00000009796	AQP9	6.21819	74.4494	7.20157e-92
ENSOCUG00000024977	ACSBG1	-4.15339	0.056196	3.34147e-91
ENSOCUG00000017790	CYP17A1	-4.63097	0.0403588	2.21295e-89
ENSOCUG00000026120	FOLH1	-3.4773	0.0897903	2.57977e-89
ENSOCUG00000012303	CYP19A1	5.64169	49.9249	1.25443e-83
ENSOCUG00000023836	NEFL	-4.12308	0.0573891	7.58692e-83
ENSOCUG00000022950	PHLDA1	3.33554	10.0948	1.4503e-81
ENSOCUG00000005094	INHBB	-3.7342	0.0751438	9.48987e-79
ENSOCUG00000008531	HSD17B3	-3.98633	0.0630948	9.19958e-78
ENSOCUG00000010649	MKX	4.19792	18.3527	4.11614e-75
ENSOCUG00000004228	PRSS33	-6.30851	0.0126168	7.94155e-75
ENSOCUG00000002507	STAR	-3.9782	0.0634516	1.76583e-74
ENSOCUG00000013230	MTCL1	-2.67485	0.1566	4.62716e-74
ENSOCUG00000015136	NIBAN1	-5.84569	0.0173889	4.5229e-73
ENSOCUG00000010372	MAP3K21	-4.11553	0.0576902	3.9436e-72
ENSOCUG00000012344	KHDRBS2	4.48525	22.3972	1.04645e-71
ENSOCUG00000006839	PGBD5	-3.41359	0.0938442	2.36936e-71
ENSOCUG00000026348	KCNIP2	-4.13291	0.0569992	3.76275e-69
ENSOCUG00000027192	NPY5R	3.84318	14.352	2.37542e-68
ENSOCUG00000001920	GPRC5B	-1.73022	0.301406	4.9835e-68
ENSOCUG00000000134	NTNG2	5.02771	32.6207	1.10602e-67
ENSOCUG00000016033	WNT10A	7.40403	169.369	1.83094e-67
ENSOCUG00000022218	SPRY3	-3.12046	0.114987	3.21742e-67
ENSOCUG00000008959	MYOZ2	-9.80616	0.001117	1.38525e-65
ENSOCUG00000005789	LOC100339773	-9.91114	0.00103861	7.79029e-65
ENSOCUG00000005263	TOX	-3.32249	0.0999609	1.5959e-63
ENSOCUG00000005085	CASR	8.33728	323.423	4.19201e-63
ENSOCUG00000009346	CHRM3	3.02844	8.15927	1.23455e-62
ENSOCUG00000008623	TMEM229B	-3.1091	0.115896	2.76236e-62
ENSOCUG00000024690	KCTD8	-3.90644	0.0666875	6.41203e-61
ENSOCUG00000025494	SCG3	-3.61341	0.0817062	2.76977e-58
ENSOCUG00000039586		6.58866	96.2464	2.76977e-58
ENSOCUG00000012217	APCDD1	2.52949	5.77368	6.16443e-58
ENSOCUG00000009428	RAB6B	2.70316	6.51226	1.34953e-57
ENSOCUG00000001546	TOX3	2.40579	5.29926	2.70527e-57
ENSOCUG00000004635	AQP2	4.70229	26.0334	7.44213e-56
ENSOCUG00000004549	CYP51A1	-1.69896	0.308008	7.38837e-55
ENSOCUG00000024610	CLPS	5.2354	37.6715	1.48608e-54
ENSOCUG00000016506	PLXNB3	-3.3553	0.0977133	1.53599e-54
ENSOCUG00000007622	ADGRG1	-2.19948	0.217716	2.70382e-54
ENSOCUG00000009941	RUBCNL	-3.13988	0.11345	4.00773e-54
ENSOCUG00000009958	NPY1R	2.64727	6.2648	5.12016e-54
ENSOCUG00000001864	AQP8	-4.78341	0.0363121	5.90466e-53
ENSOCUG00000029521	ASH2L	-2.03534	0.243951	6.40433e-53
ENSOCUG00000014250	LOC103351160	5.06007	33.3606	6.98264e-53
ENSOCUG00000004491	CCDC73	2.77053	6.82361	1.74174e-52
ENSOCUG00000014215	MOGAT2	3.80651	13.9918	2.10309e-51
ENSOCUG00000012556	NFATC2	-2.91904	0.132215	3.60532e-51
ENSOCUG00000001047	SMARCA1	-1.35693	0.390411	3.92427e-51
ENSOCUG00000008378	DPP10	2.74159	6.68807	3.97144e-51
ENSOCUG00000008316	STRIP2	-2.89564	0.134377	8.08877e-51
ENSOCUG00000024593	AOX4	2.26824	4.81737	8.82237e-51
ENSOCUG00000009581	TACR3	5.0856	33.9562	2.33481e-50
ENSOCUG00000002719	EPN3	-2.43469	0.184963	6.13114e-50
ENSOCUG00000007830	IL31RA	4.2867	19.5175	1.21983e-49
ENSOCUG00000012489	PTCH2	-2.26424	0.208159	3.12344e-49
ENSOCUG00000029837		-2.24555	0.210873	6.48684e-49
ENSOCUG00000025335	SYNPO2L	-3.92888	0.0656582	7.79165e-49
ENSOCUG00000013186	TNFRSF13C	3.77208	13.6618	1.20187e-48
ENSOCUG00000000778	DENND5B	-1.59653	0.330671	3.68984e-48
ENSOCUG00000005228	NKD1	2.55477	5.87574	8.41032e-48
ENSOCUG00000033275	MMD2	-4.5344	0.0431528	1.14613e-47
ENSOCUG00000024221	INMT	-4.5771	0.0418942	5.67783e-47
ENSOCUG00000024647	KCNE2	4.94513	30.8058	8.41702e-46
ENSOCUG00000013016	MAPK4	2.66835	6.35702	1.06212e-45
ENSOCUG00000014275	LOC100353214	-4.398	0.0474319	3.48192e-45
ENSOCUG00000006696		6.3639	82.3613	5.1054e-45
ENSOCUG00000005253	GNAL	2.42238	5.36056	8.83661e-44
ENSOCUG00000002345	CA10	-3.24973	0.105132	1.4378e-43
DTOCUGHSD3Balpha	HSD3Balpha	-8.63164	0.00252125	3.46953e-43
ENSOCUG00000008325	ALDH2	-1.89085	0.269648	3.46953e-43
ENSOCUG00000008823	P2RX7	-1.95597	0.257747	5.73767e-43
ENSOCUG00000005043	LIPH	-3.73085	0.0753187	6.77816e-43
ENSOCUG00000012561	SLC43A3	-1.96126	0.256804	8.74606e-43
ENSOCUG00000010286	DOCK3	-3.35065	0.0980292	1.23589e-42
ENSOCUG00000003569	HMGCS1	-2.78049	0.145543	1.23589e-42
ENSOCUG00000017458	NEB	3.34603	10.1684	4.47934e-42
ENSOCUG00000024881		4.59584	24.1817	1.20916e-41
ENSOCUG00000015299	ARHGAP36	3.25513	9.54758	1.7638e-41
ENSOCUG00000027865	CYP11A1	-3.33895	0.0988268	2.07474e-41
ENSOCUG00000004783	NKAIN1	-2.51829	0.17455	3.03283e-41
ENSOCUG00000009404	KIF19	-5.77253	0.0182934	5.19674e-41
ENSOCUG00000025719	NOMO1	-1.50585	0.352122	1.7158e-40
ENSOCUG00000030642	SMIM32	4.03402	16.3818	2.21756e-40
ENSOCUG00000010196	REEP1	2.2141	4.63992	7.19624e-40
ENSOCUG00000005249	DDAH1	2.34168	5.06894	1.09179e-39
ENSOCUG00000010280	PGRMC1	-1.35218	0.3917	1.66181e-39
ENSOCUG00000008784	NALCN	3.28538	9.74985	1.90515e-39
ENSOCUG00000013731	RUNX1	2.91473	7.54086	2.51716e-39
ENSOCUG00000001373	BRINP1	2.45422	5.48015	2.55122e-39
ENSOCUG00000000651	LDLR	-2.10242	0.232867	3.24246e-39
ENSOCUG00000005839		-2.66869	0.15727	6.3798e-39
ENSOCUG00000016605	AKR1B1	-2.37411	0.192895	7.62597e-39
ENSOCUG00000007855	PXYLP1	1.56278	2.95423	1.18564e-38
ENSOCUG00000017322	ERBB3	-3.37971	0.0960742	1.4468e-38
ENSOCUG00000005165	ADRA2A	-3.41609	0.0936819	1.44709e-38
ENSOCUG00000029602	PNLIP	6.05332	66.4097	2.01409e-38
ENSOCUG00000008631	AGFG2	-2.35006	0.196137	2.32978e-38
ENSOCUG00000009395	CNTN1	-3.55044	0.0853512	2.34282e-38
ENSOCUG00000016645	LRP8	-2.80731	0.142862	2.4972e-38
ENSOCUG00000012233	GGT5	-3.35616	0.0976554	3.60333e-38
ENSOCUG00000014102	JCAD	-2.61363	0.163388	5.11632e-38
ENSOCUG00000021297	TRIM29	4.45737	21.9685	5.1735e-38
ENSOCUG00000003720	DUSP4	2.54023	5.8168	7.65512e-38
ENSOCUG00000013530	CCDC170	3.12791	8.74165	9.00491e-38
ENSOCUG00000012007	PRR5L	-1.85648	0.276148	1.45855e-37
ENSOCUG00000013534	ENPP2	-1.91695	0.264814	1.58539e-37
ENSOCUG00000006702	GPR37	-5.01534	0.0309194	1.76316e-37
ENSOCUG00000001457	MYF6	3.63417	12.4164	2.04351e-37
ENSOCUG00000021812	LOC100340803	-1.59283	0.331521	3.65812e-37
ENSOCUG00000020990		-2.49432	0.177474	5.06267e-37
ENSOCUG00000009515	POPDC2	4.78599	27.5884	6.63572e-37
ENSOCUG00000011021	MYBPH	4.90307	29.9206	1.57162e-36
ENSOCUG00000002112	MYBPC3	-3.5683	0.0843014	5.25801e-36
ENSOCUG00000002433		3.60093	12.1336	2.03093e-35
ENSOCUG00000011514	MFAP3L	-2.38619	0.191287	2.51774e-35
ENSOCUG00000016256	HAND2	-2.18911	0.219287	2.87059e-35
ENSOCUG00000016496	MLPH	-5.86657	0.0171391	2.87059e-35
ENSOCUG00000010524	RBP4	-4.13421	0.0569481	3.69419e-35
ENSOCUG00000017588	KLHDC8B	-1.66958	0.314346	4.05151e-35
ENSOCUG00000011227	LHCGR	-3.85322	0.0691933	7.38376e-35
ENSOCUG00000003769	MSMO1	-2.13085	0.228323	1.40934e-34
ENSOCUG00000023590		-2.71386	0.152421	1.90022e-34
ENSOCUG00000004598	TNIK	-3.29347	0.101992	5.33199e-34
ENSOCUG00000004364	SALL1	5.24869	38.0201	6.53655e-34
ENSOCUG00000025884	RCAN2	-1.82477	0.282286	1.66446e-33
ENSOCUG00000012115	AXIN2	1.95821	3.88579	2.29726e-33
ENSOCUG00000000409	COL6A2	-2.29525	0.203733	2.50889e-33
ENSOCUG00000035803		3.93121	15.2549	2.55971e-33
ENSOCUG00000000706	FHOD3	-3.48045	0.0895943	3.02673e-33
ENSOCUG00000008140	TTLL7	1.83781	3.57466	5.21528e-33
ENSOCUG00000025015	EDAR	2.10157	4.29178	5.53067e-33
ENSOCUG00000007237	HSD17B11	-1.99415	0.251015	1.82906e-32
ENSOCUG00000000266	WNT2B	2.03363	4.09432	1.82906e-32
ENSOCUG00000008644	LOC100339305	-2.4726	0.180166	4.36352e-32
ENSOCUG00000003040	ADAMTS3	-2.67239	0.156867	5.22104e-32
ENSOCUG00000025148	COL5A1	-2.27839	0.206127	5.39619e-32
ENSOCUG00000033778		2.52695	5.76352	5.97897e-32
ENSOCUG00000014317	PIGR	-7.95609	0.00402698	1.271e-31
ENSOCUG00000013507	NMUR2	7.68375	205.608	1.41704e-31
ENSOCUG00000026384	HR	-3.77446	0.073076	2.17393e-31
ENSOCUG00000013363	STIM1	-1.38466	0.382979	2.38262e-31
ENSOCUG00000013429	NHSL1	-2.03322	0.244309	2.92804e-31
ENSOCUG00000008204	SOAT1	-1.3604	0.389475	3.22577e-31
ENSOCUG00000003153	TRIB2	-1.80936	0.285318	3.32926e-31
ENSOCUG00000021140		-4.84696	0.0347472	6.11893e-31
ENSOCUG00000002701	CHADL	-2.92386	0.131775	6.5853e-31
ENSOCUG00000015565	KCNJ5	1.92731	3.80347	9.54914e-31
ENSOCUG00000017082	IGSF11	-2.2088	0.216314	9.87952e-31
ENSOCUG00000025290		-4.21389	0.0538881	1.14449e-30
ENSOCUG00000003371	SELENBP1	-2.13738	0.227292	1.61313e-30
ENSOCUG00000001264	CMYA5	-4.33253	0.0496339	3.26374e-30
ENSOCUG00000021324	NDP	-2.10798	0.231971	5.79422e-30
ENSOCUG00000003633	GFRA1	-3.34715	0.0982666	6.09517e-30
ENSOCUG00000000802	WIPF3	-1.78126	0.290929	7.36571e-30
ENSOCUG00000011353	INHA	-2.4428	0.183926	7.58048e-30
ENSOCUG00000007472		-3.56491	0.0844997	9.85304e-30
ENSOCUG00000008489	SLC30A8	1.89162	3.71051	1.0776e-29
ENSOCUG00000002824	PITPNM3	-3.7784	0.0728764	1.31722e-29
ENSOCUG00000028213	PIFO	5.44633	43.6022	1.64063e-29
ENSOCUG00000012005	ME3	-2.28942	0.204558	1.88294e-29
ENSOCUG00000025190	LRRC58	2.21936	4.65686	1.94954e-29
ENSOCUG00000003087	SLITRK3	2.74368	6.69776	2.14843e-29
ENSOCUG00000023746	LOC100347786	1.28437	2.43576	3.19129e-29
ENSOCUG00000001353	UCHL1	2.87652	7.34375	6.51545e-29
ENSOCUG00000011657	DRD2	2.82809	7.10132	6.83153e-29
ENSOCUG00000000280	TAFA3	3.84146	14.3349	8.72988e-29
ENSOCUG00000008355	ARSA	-1.61754	0.325892	1.13004e-28
ENSOCUG00000007866	G6PD	-1.48646	0.356886	1.64299e-28
ENSOCUG00000008996	SLC41A3	-1.58552	0.333205	1.65668e-28
ENSOCUG00000002907	CNTNAP4	-4.93173	0.0327644	1.77891e-28
ENSOCUG00000009616	CRISPLD1	-1.62276	0.324713	2.08495e-28
ENSOCUG00000003963	BCAT1	-3.31085	0.100771	2.30366e-28
ENSOCUG00000030606	DEFB119	-4.17939	0.0551925	3.73728e-28
ENSOCUG00000021736		-2.02132	0.246332	4.0158e-28
ENSOCUG00000009200	CYTIP	-2.25006	0.210216	4.45068e-28
ENSOCUG00000009839	HDAC11	-1.41998	0.373717	4.53185e-28
ENSOCUG00000027014	MFRP	-6.72663	0.00944242	7.59414e-28
ENSOCUG00000005882	WT1	1.00938	2.01304	9.10071e-28
ENSOCUG00000038788		-1.84339	0.278667	1.38882e-27
ENSOCUG00000008628	PNPLA1	2.85806	7.25041	1.45383e-27
ENSOCUG00000002685	ADCY8	-5.198	0.0272425	1.83654e-27
ENSOCUG00000002344	SEMA3B	-1.42817	0.371602	2.55189e-27
ENSOCUG00000012659	TUFT1	1.85811	3.62532	2.89475e-27
ENSOCUG00000016029	IQCD	2.18764	4.55559	3.3802e-27
ENSOCUG00000017227	SPATS1	-4.16363	0.0557985	3.84689e-27
ENSOCUG00000003033	GDNF	-5.41143	0.0234962	4.60047e-27
ENSOCUG00000005827		-2.47805	0.179487	5.66949e-27
ENSOCUG00000008178	PNLIPRP1	7.24189	151.365	6.55305e-27
ENSOCUG00000012022	EOGT	1.24528	2.37065	7.26444e-27
ENSOCUG00000036212	PCP4	-3.2126	0.107872	7.30591e-27
ENSOCUG00000011627	HRH2	3.09978	8.57286	7.5465e-27
ENSOCUG00000008177	MGAM	3.90819	15.0136	9.01615e-27
ENSOCUG00000016118	TSPYL4	1.25377	2.38463	1.00508e-26
ENSOCUG00000004959	HHIP	-4.79635	0.0359879	1.09491e-26
ENSOCUG00000015307	SLC35F1	1.77826	3.43012	1.24609e-26
ENSOCUG00000024536	SPTSSB	3.65544	12.6007	1.79701e-26
ENSOCUG00000026941	MEOX2	3.25477	9.5452	1.81046e-26
ENSOCUG00000008464	PRKG2	3.88373	14.7611	1.81046e-26
ENSOCUG00000014979	MBNL3	-2.08354	0.235935	1.97626e-26
ENSOCUG00000009197	DCAF13	1.3847	2.61118	2.09025e-26
ENSOCUG00000033625		-3.96625	0.0639792	2.14452e-26
ENSOCUG00000008043	ERC2	2.59499	6.04186	2.22597e-26
ENSOCUG00000005740	ARL6IP1	-1.28117	0.411461	2.94632e-26
ENSOCUG00000038903		2.31432	4.97369	3.06176e-26
ENSOCUG00000007668	PTK2B	-3.5529	0.0852058	3.22587e-26
ENSOCUG00000017113	ASB4	-2.6615	0.158055	3.22674e-26
ENSOCUG00000010111	P4HA3	2.01554	4.04333	3.32567e-26
ENSOCUG00000014910	TIPARP	1.95573	3.87913	3.44189e-26
ENSOCUG00000021648	KCNK12	3.16964	8.99821	3.71996e-26
ENSOCUG00000005496	SLC7A9	-2.47285	0.180135	5.232e-26
ENSOCUG00000009597	CEL	-5.82217	0.0176747	5.8899e-26
ENSOCUG00000000611	FKBP10	-1.1141	0.461978	6.16609e-26
ENSOCUG00000012043	CAMKK1	-2.14381	0.226282	6.46317e-26
ENSOCUG00000004957	GALNT3	2.38115	5.2095	1.05567e-25
ENSOCUG00000004622	PAPSS1	-1.10487	0.464944	2.76938e-25
ENSOCUG00000003773	DTNA	-2.2128	0.215715	3.58402e-25
ENSOCUG00000021803		-2.57436	0.167896	4.73864e-25
ENSOCUG00000007042	DCX	2.96621	7.81479	5.47711e-25
ENSOCUG00000033927	LOC103350399	6.66014	101.135	7.25978e-25
ENSOCUG00000015363	NFASC	-3.09794	0.116796	1.05563e-24
ENSOCUG00000027803	SH3GL3	-2.02299	0.246047	1.10217e-24
ENSOCUG00000024308	MMP11	-1.17875	0.441733	1.14839e-24
ENSOCUG00000021234	LOC100346323	3.51657	11.4444	1.16651e-24
ENSOCUG00000000108	ARL4A	2.5475	5.84622	1.18024e-24
ENSOCUG00000016209	CALCOCO2	-1.0664	0.477508	1.50692e-24
ENSOCUG00000038015		2.5482	5.84903	1.52123e-24
ENSOCUG00000029297	LMO3	3.00507	8.02815	2.22722e-24
ENSOCUG00000006753	OPTC	-3.57472	0.0839268	2.46855e-24
ENSOCUG00000035342		-1.9234	0.263633	3.34857e-24
ENSOCUG00000015211	ATP8A2	-2.85473	0.138243	3.36573e-24
ENSOCUG00000012608	PTGER2	5.31877	39.9125	3.57004e-24
ENSOCUG00000000252	DIRAS2	3.14076	8.81988	7.62818e-24
ENSOCUG00000015071	ALDH1L1	-2.52455	0.173794	8.38625e-24
ENSOCUG00000015771	SQLE	-1.65574	0.317374	8.747e-24
ENSOCUG00000000827	SLMAP	-1.2377	0.424049	8.93085e-24
ENSOCUG00000005835	STXBP5L	2.77991	6.8681	1.00112e-23
ENSOCUG00000013062	ACSL6	-2.34623	0.196659	1.03961e-23
ENSOCUG00000016236	COL15A1	-2.04185	0.242852	1.07326e-23
ENSOCUG00000003743	KLHL21	-1.22267	0.428489	1.37474e-23
ENSOCUG00000001596	B3GALT2	-5.73104	0.0188272	1.38435e-23
ENSOCUG00000023043	TLE3	1.33464	2.52213	1.47376e-23
ENSOCUG00000013238	ELF4	-1.72064	0.303413	1.57175e-23
ENSOCUG00000034789		3.63523	12.4254	1.57175e-23
ENSOCUG00000006705	GPR156	1.5058	2.83982	1.92035e-23
ENSOCUG00000009150	TSKS	-2.14109	0.226708	2.06918e-23
ENSOCUG00000017423	PCSK6	-1.64586	0.319556	2.78912e-23
ENSOCUG00000022761	IL3RA	4.45882	21.9907	2.91425e-23
ENSOCUG00000013801	SHCBP1	1.46983	2.7699	3.20031e-23
ENSOCUG00000002137	UGP2	-1.385	0.382889	3.63339e-23
ENSOCUG00000012811	SMOC1	1.06518	2.09242	3.72617e-23
ENSOCUG00000013134	ST8SIA1	-1.85321	0.276776	4.36687e-23
ENSOCUG00000008497	TOX2	-2.78866	0.14472	5.11717e-23
ENSOCUG00000024555	KCTD12	-1.35867	0.389941	5.35314e-23
ENSOCUG00000022383	OSR2	-3.21047	0.108032	6.24779e-23
ENSOCUG00000029644	ICAM1	-3.58871	0.0831169	6.30532e-23
ENSOCUG00000016560	ACKR4	3.69364	12.9389	6.53797e-23
ENSOCUG00000025973	POPDC3	-3.9136	0.0663573	6.57338e-23
ENSOCUG00000007886	CYRIA	-1.76436	0.294357	7.69027e-23
ENSOCUG00000006416	NR0B2	-3.35291	0.0978757	9.8809e-23
ENSOCUG00000001863	VAT1L	1.94622	3.85363	9.97706e-23
ENSOCUG00000021847	RMDN2	-2.00133	0.24977	1.02694e-22
ENSOCUG00000005415	PXMP4	-1.32612	0.398841	1.13606e-22
ENSOCUG00000002580	CHRNA7	2.19312	4.57293	1.13606e-22
ENSOCUG00000007885	KCNAB1	1.92019	3.78473	1.32533e-22
ENSOCUG00000001436	MAOB	1.68378	3.21269	1.32533e-22
ENSOCUG00000010456	RASGEF1B	1.2182	2.32656	1.33426e-22
ENSOCUG00000029538	FLVCR2	2.44837	5.45798	1.43334e-22
ENSOCUG00000009954	CHST4	3.02639	8.14768	1.70311e-22
ENSOCUG00000007772	TMC3	6.71509	105.062	2.42862e-22
ENSOCUG00000014767	PAG1	-2.30194	0.20279	2.46996e-22
ENSOCUG00000004492	KCNQ1	-2.97489	0.127194	2.64267e-22
ENSOCUG00000009653	SLITRK4	2.44893	5.46012	2.85623e-22
ENSOCUG00000008068	BCHE	2.06053	4.17139	2.93799e-22
ENSOCUG00000037644	PRCD	-2.00561	0.24903	3.15938e-22
ENSOCUG00000010145	VAMP2	-1.63799	0.321303	4.01984e-22
ENSOCUG00000006497	PXDN	-1.69124	0.309662	7.46094e-22
ENSOCUG00000001380		-4.05967	0.0599678	8.60604e-22
ENSOCUG00000012442	TBC1D1	1.10437	2.15006	1.1191e-21
ENSOCUG00000006519	ABHD1	-4.10723	0.0580229	1.16545e-21
ENSOCUG00000022873	LOC100357183	2.35761	5.12522	1.35207e-21
ENSOCUG00000004294	NKX3-1	-3.18756	0.109761	1.50171e-21
ENSOCUG00000011172	OPCML	-3.23619	0.106123	1.77558e-21
ENSOCUG00000029756	SIAH3	1.96291	3.89847	1.87474e-21
ENSOCUG00000033970		-1.94009	0.2606	1.89441e-21
ENSOCUG00000005341	HEXB	-1.35946	0.389729	2.07674e-21
ENSOCUG00000004035	IRF6	1.98704	3.96423	2.26075e-21
ENSOCUG00000001304	AGAP2	-2.2946	0.203825	2.4255e-21
ENSOCUG00000001035	ADAMTS2	-2.09297	0.234397	2.49648e-21
ENSOCUG00000010458	NECTIN1	2.02257	4.06308	2.49648e-21
ENSOCUG00000017109	TTC39C	-1.33155	0.397342	2.49648e-21
ENSOCUG00000000815	GPR75	2.547	5.84416	2.61182e-21
ENSOCUG00000009794	HTR1A	3.22507	9.35069	2.61931e-21
ENSOCUG00000016688	MTM1	-1.16777	0.445109	2.95373e-21
ENSOCUG00000007089	PLK2	-1.45244	0.365403	2.97019e-21
ENSOCUG00000014595	TBX3	1.61242	3.05763	3.47835e-21
ENSOCUG00000015958	GALNT2	-1.20121	0.43491	3.58801e-21
ENSOCUG00000021401		-1.53159	0.345896	3.80189e-21
ENSOCUG00000025111	GALNT15	3.85302	14.4502	4.08922e-21
ENSOCUG00000013017	ELOVL2	-1.51385	0.350176	4.52168e-21
ENSOCUG00000011944	ENPP6	-3.19995	0.108822	5.61624e-21
ENSOCUG00000029143	DSC3	-4.43319	0.0462889	5.72816e-21
ENSOCUG00000015430	TRIM72	-4.26389	0.0520525	5.72816e-21
ENSOCUG00000004633	PTGER3	-2.55992	0.169584	6.26508e-21
ENSOCUG00000008298	FAXC	1.69275	3.23271	6.45439e-21
ENSOCUG00000002998	PKDCC	-1.68085	0.311898	6.97995e-21
ENSOCUG00000013920	KRT80	-3.64305	0.0800449	7.99182e-21
ENSOCUG00000008197	PCDH8	4.65756	25.2386	8.52429e-21
ENSOCUG00000032489		3.34712	10.1762	8.53902e-21
ENSOCUG00000016642	PROM1	1.66783	3.17735	1.04805e-20
ENSOCUG00000003254	CDKL2	1.83311	3.56305	1.07776e-20
ENSOCUG00000016712	DNER	-2.14115	0.226698	1.23256e-20
ENSOCUG00000013795	INSIG1	-1.86117	0.275254	1.28708e-20
ENSOCUG00000000560	HEYL	-2.25482	0.209523	1.97885e-20
ENSOCUG00000005937	SCD5	1.65151	3.14162	3.17252e-20
ENSOCUG00000017639	GDI1	-1.00459	0.49841	3.5168e-20
ENSOCUG00000009657	SDR16C5	3.61786	12.2768	3.98476e-20
ENSOCUG00000010814	ME1	-2.24038	0.211631	4.17229e-20
ENSOCUG00000016632	PDE7B	1.86778	3.64971	5.23458e-20
ENSOCUG00000011749	AHCYL2	-1.36217	0.388997	5.24021e-20
ENSOCUG00000000960	SDK2	-2.20103	0.217483	5.29402e-20
ENSOCUG00000013504	C15orf39	-1.41682	0.374537	5.96928e-20
ENSOCUG00000008754	CAMKV	2.4328	5.3994	5.96928e-20
ENSOCUG00000024515	OS9	-1.11371	0.462104	6.46806e-20
ENSOCUG00000034003		-3.47188	0.0901278	6.46806e-20
ENSOCUG00000013967	MVK	-1.39733	0.379632	7.53146e-20
ENSOCUG00000003240	IRX5	3.76896	13.6323	8.16938e-20
ENSOCUG00000001386	CTTNBP2	2.04605	4.12973	8.94835e-20
ENSOCUG00000003499	FADS2	-1.24277	0.422559	1.13278e-19
ENSOCUG00000013115	C10orf82	-2.85599	0.138121	1.15698e-19
ENSOCUG00000017667	ATP1A2	1.79799	3.47735	1.19152e-19
ENSOCUG00000010292	EFHC2	1.60157	3.03473	1.23478e-19
ENSOCUG00000014077	LTBP2	-2.28871	0.204658	1.81888e-19
ENSOCUG00000001938	LSS	-1.49172	0.35559	2.30393e-19
ENSOCUG00000013544	ATP6V0A4	2.92759	7.60837	2.54542e-19
ENSOCUG00000010534	DLG2	-2.42348	0.186406	2.6628e-19
ENSOCUG00000005836	NRG1	-2.34126	0.197338	3.49446e-19
ENSOCUG00000007053	CYP21A2	-5.94109	0.0162762	3.75579e-19
ENSOCUG00000000531	LOC100354911	-1.32005	0.400522	4.13933e-19
ENSOCUG00000023854	LOC100356924	-3.05006	0.120737	4.34242e-19
ENSOCUG00000014076	DGKB	1.9923	3.97872	4.71316e-19
ENSOCUG00000010012	AK4	2.17399	4.51268	5.16571e-19
ENSOCUG00000005900	FBLN2	-2.34777	0.19645	6.19954e-19
ENSOCUG00000014063		-2.12146	0.229815	6.75288e-19
ENSOCUG00000033095		-1.47797	0.358993	7.58107e-19
ENSOCUG00000002000	SGCD	-3.35553	0.0976976	7.67204e-19
ENSOCUG00000027575	KCNH2	-1.29434	0.407722	8.89871e-19
ENSOCUG00000011128	GLI1	-3.25327	0.104874	1.10659e-18
ENSOCUG00000010379	FREM1	-2.32241	0.199934	1.24669e-18
ENSOCUG00000009850	NPC1	-1.66209	0.315982	1.32356e-18
ENSOCUG00000033536	FDPS	-1.16749	0.445196	1.70892e-18
ENSOCUG00000011843	HSD11B2	1.93285	3.8181	1.93549e-18
ENSOCUG00000007899	NSDHL	-1.36822	0.387368	2.46122e-18
ENSOCUG00000005824	GLB1	-1.22252	0.428533	2.59226e-18
ENSOCUG00000010425	FABP5	1.69893	3.2466	2.63254e-18
ENSOCUG00000029073	STUM	-2.85053	0.138645	3.273e-18
ENSOCUG00000007358	STK26	1.41069	2.65864	3.50803e-18
ENSOCUG00000000934	LRRC4B	-1.69191	0.309517	4.34364e-18
ENSOCUG00000023790	ROR1	1.99844	3.99568	4.34364e-18
ENSOCUG00000012747	PRKAR2B	-1.63883	0.321117	4.37412e-18
ENSOCUG00000002037	PTPN21	-1.15821	0.448069	5.97755e-18
ENSOCUG00000030225		-4.09221	0.0586304	6.34889e-18
ENSOCUG00000038381		-4.41797	0.0467799	7.0541e-18
DTOCUGWNT4	WNT4	1.80079	3.48411	7.54606e-18
ENSOCUG00000008267	CYP4X1	-1.72669	0.302144	7.56253e-18
ENSOCUG00000009467	CFAP91	1.87128	3.65858	7.64523e-18
ENSOCUG00000014914	AEBP1	-2.08961	0.234944	7.69546e-18
ENSOCUG00000013276	COL4A2	-1.89579	0.268726	8.82943e-18
ENSOCUG00000024073	DUSP26	-1.08326	0.471962	9.47528e-18
ENSOCUG00000009837	RMC1	-1.31428	0.402127	9.53339e-18
ENSOCUG00000036497		-2.1444	0.226189	1.06746e-17
ENSOCUG00000006943	UNC5B	-1.61316	0.326881	1.16878e-17
ENSOCUG00000013688	TNFAIP6	-2.83161	0.140475	1.18946e-17
ENSOCUG00000025301	CCDC24	-3.02803	0.122595	1.43916e-17
ENSOCUG00000038568		-1.70962	0.30574	1.66414e-17
ENSOCUG00000008597	DDX4	2.70371	6.51476	1.71559e-17
ENSOCUG00000016660	SFRP2	2.33634	5.05019	1.79771e-17
ENSOCUG00000025894	TST	-1.30266	0.405378	1.82657e-17
ENSOCUG00000003249	FZD1	-2.13214	0.228119	1.85849e-17
ENSOCUG00000014916	SEMA4B	1.30386	2.46889	2.08778e-17
ENSOCUG00000011037	MYH7	-3.27272	0.10347	2.11562e-17
ENSOCUG00000024443	LOC100356307	-1.37539	0.385449	2.13595e-17
ENSOCUG00000008220	KIF26B	-2.3163	0.200782	2.17133e-17
ENSOCUG00000012521	RADX	2.15256	4.44617	2.46323e-17
ENSOCUG00000025477	MYF5	3.98828	15.8705	2.49785e-17
ENSOCUG00000011273	KIF5A	-2.4035	0.189005	2.70793e-17
ENSOCUG00000029817		2.42585	5.37346	2.86613e-17
ENSOCUG00000006739	NAGA	-1.48459	0.35735	3.18659e-17
ENSOCUG00000001655	LIX1	2.20934	4.62463	3.18659e-17
ENSOCUG00000011096	MGAT5	-1.89527	0.268822	3.43032e-17
ENSOCUG00000009427	LAMA2	-3.41406	0.0938136	3.73282e-17
ENSOCUG00000011639	SOX9	-1.60433	0.328889	3.73282e-17
ENSOCUG00000013793	PIGS	-1.06171	0.479065	3.79614e-17
ENSOCUG00000017272	COBLL1	-1.79498	0.288175	3.85402e-17
ENSOCUG00000025013	SLC45A3	-2.42347	0.186407	3.99791e-17
ENSOCUG00000037050		-1.91191	0.265741	4.46451e-17
ENSOCUG00000015546	SLC24A4	1.59835	3.02796	4.53023e-17
ENSOCUG00000007332	WDR66	1.52741	2.88267	4.56812e-17
ENSOCUG00000005669	ADGRD1	-1.5617	0.338753	4.61065e-17
ENSOCUG00000005816	SORBS2	-3.28998	0.102239	5.59197e-17
ENSOCUG00000000852	CCDC181	1.42083	2.6774	6.07118e-17
ENSOCUG00000000721	PAMR1	-2.39861	0.189647	6.62596e-17
ENSOCUG00000013498	ADAMTS4	-1.72178	0.303174	9.80376e-17
ENSOCUG00000026022	DERL3	-3.40153	0.094632	1.05931e-16
ENSOCUG00000001405	ABTB2	-1.80283	0.286612	1.06161e-16
ENSOCUG00000000566	XPR1	-1.20383	0.434123	1.12165e-16
ENSOCUG00000001717	SKAP1	2.29167	4.89624	1.19749e-16
ENSOCUG00000016823	COBL	-1.67968	0.312151	1.24862e-16
ENSOCUG00000001085	ALK	-4.06779	0.0596312	1.24863e-16
ENSOCUG00000015995	SLC17A8	-4.33802	0.0494453	1.31823e-16
ENSOCUG00000010126	ST3GAL5	-1.0971	0.467456	1.3412e-16
ENSOCUG00000000715	CD44	-2.53221	0.172874	1.49347e-16
ENSOCUG00000009707	PRELP	-2.34756	0.196478	1.72808e-16
ENSOCUG00000016311	GLS2	-2.30543	0.2023	1.85946e-16
ENSOCUG00000007599	NR6A1	1.84317	3.58798	2.28829e-16
ENSOCUG00000027507	VDR	3.05797	8.32799	2.30859e-16
ENSOCUG00000023226	TTYH1	-3.52481	0.0868811	2.72413e-16
ENSOCUG00000002251	RCSD1	-1.52194	0.348217	2.74424e-16
ENSOCUG00000012280	GPC5	-1.81028	0.285137	2.93894e-16
ENSOCUG00000024229	SOWAHD	2.30669	4.94748	2.96722e-16
ENSOCUG00000011714	CLPTM1	-1.31687	0.401405	3.08235e-16
ENSOCUG00000011017	ADORA1	1.76416	3.39676	3.4662e-16
ENSOCUG00000025172	KCNK3	1.63308	3.10174	3.732e-16
ENSOCUG00000010729	RASL12	-2.47971	0.17928	3.77023e-16
ENSOCUG00000014237	GK5	-1.75826	0.295604	4.1023e-16
ENSOCUG00000022282	EDA2R	-1.63862	0.321164	4.34429e-16
ENSOCUG00000014805	WNT3	2.52719	5.76448	4.45443e-16
ENSOCUG00000007555	PGLYRP2	-2.71618	0.152177	4.49345e-16
ENSOCUG00000004829	ESR1	2.0959	4.27494	4.64982e-16
ENSOCUG00000004513	DACH2	2.53367	5.79043	5.11175e-16
ENSOCUG00000022857	EFNB2	1.1706	2.25105	5.3428e-16
ENSOCUG00000001765	DKK2	-1.9045	0.267108	6.13656e-16
ENSOCUG00000024485	RAP1GAP	1.21386	2.31958	6.36413e-16
ENSOCUG00000014902	UPP1	1.84056	3.58149	6.72808e-16
ENSOCUG00000027792	TMEM52	-1.91366	0.265418	6.92701e-16
ENSOCUG00000012056	RNF43	-2.97041	0.12759	7.02928e-16
ENSOCUG00000024481	CAPN3	2.16933	4.49814	7.07682e-16
ENSOCUG00000010300	LGALS12	2.06386	4.18103	7.52623e-16
ENSOCUG00000002988	ATP1B2	-1.80532	0.286117	8.00862e-16
ENSOCUG00000012272	PRRX1	2.08717	4.24914	8.18717e-16
ENSOCUG00000007916	GCNT1	1.80217	3.48746	8.19272e-16
ENSOCUG00000035603		-1.68577	0.310836	8.32828e-16
ENSOCUG00000011330	SKAP2	-1.68421	0.311173	8.89508e-16
ENSOCUG00000034018		1.84425	3.59065	9.1208e-16
ENSOCUG00000022009	HSD17B1	2.09707	4.27841	9.94509e-16
ENSOCUG00000038032	DEFB125	-3.40376	0.0944856	1.03822e-15
ENSOCUG00000014622	AKR7A3	-2.41844	0.187058	1.03946e-15
ENSOCUG00000024585		-1.60803	0.328046	1.15894e-15
ENSOCUG00000004582	DMRT3	1.98044	3.94613	1.28774e-15
ENSOCUG00000016069	RNF144A	-1.0275	0.490561	1.28774e-15
ENSOCUG00000025780	CCL25	-2.4864	0.178452	1.32253e-15
ENSOCUG00000008587	TNFSF4	-1.42107	0.373436	1.54732e-15
ENSOCUG00000030903		-1.03439	0.488222	1.54968e-15
ENSOCUG00000015865	PCDH19	-2.37902	0.192239	1.69071e-15
ENSOCUG00000001725	PDGFRB	-2.27729	0.206285	1.77856e-15
ENSOCUG00000016955	TMEM164	-1.19397	0.437098	2.04593e-15
ENSOCUG00000025995	ASB2	-1.94607	0.259523	2.06355e-15
ENSOCUG00000013284	ST18	6.8629	116.396	2.06355e-15
ENSOCUG00000016945	ITIH5	-1.32348	0.39957	2.17849e-15
ENSOCUG00000017382	MAGI3	-1.303	0.405284	2.20746e-15
ENSOCUG00000017373	PLEKHA7	-2.39774	0.189762	2.38441e-15
ENSOCUG00000012016	SEMA3D	-2.00587	0.248985	2.40051e-15
ENSOCUG00000002537	ROBO1	-1.7585	0.295555	2.48856e-15
ENSOCUG00000014352	GATM	-1.49235	0.355434	2.75577e-15
ENSOCUG00000001177	IL10RB	-1.77252	0.292696	2.76989e-15
ENSOCUG00000015705	MAST4	-1.96019	0.256994	2.78357e-15
ENSOCUG00000016651	AXL	-1.09041	0.469628	2.8328e-15
ENSOCUG00000029070	ZNF385D	-1.46898	0.361238	3.15425e-15
ENSOCUG00000012349	COL7A1	-2.2353	0.212377	3.24683e-15
ENSOCUG00000009718	STOX2	-2.57578	0.167731	3.25513e-15
ENSOCUG00000027072		1.63636	3.1088	3.25513e-15
ENSOCUG00000017729	SCN7A	3.17095	9.00641	3.59856e-15
ENSOCUG00000008551	ALAS1	-1.05254	0.482117	3.62053e-15
ENSOCUG00000006167		-5.63749	0.0200885	3.68415e-15
ENSOCUG00000038584	EFNA4	1.16449	2.24154	4.13946e-15
ENSOCUG00000027810	ZFAND4	1.84391	3.58983	4.15965e-15
ENSOCUG00000004703	SCMH1	-1.04925	0.48322	4.19319e-15
ENSOCUG00000021327	STARD10	1.87932	3.67902	4.28311e-15
ENSOCUG00000015669	ARAP2	-1.83575	0.280147	4.51816e-15
ENSOCUG00000023010	KLHDC8A	-2.21151	0.215908	4.60792e-15
ENSOCUG00000007056	TNXB	-2.85011	0.138686	4.67271e-15
ENSOCUG00000001439	FAT1	-1.75286	0.296713	5.33871e-15
ENSOCUG00000005826	PCDH10	-2.10576	0.232328	5.59087e-15
ENSOCUG00000033457		-1.76021	0.295205	6.18568e-15
ENSOCUG00000005747	COL16A1	-2.659	0.158329	6.21618e-15
ENSOCUG00000007837	LRRC39	-4.83101	0.0351334	6.32774e-15
ENSOCUG00000027209	ST6GAL1	1.26313	2.40015	6.35152e-15
ENSOCUG00000003271	GAB1	-1.26965	0.414761	6.67832e-15
ENSOCUG00000007510	LRIG1	1.41024	2.65782	6.67832e-15
ENSOCUG00000003165	SCUBE2	1.26119	2.39694	6.98911e-15
ENSOCUG00000008629	KCNK2	-1.26261	0.416789	7.40291e-15
ENSOCUG00000005808	PDLIM3	-2.48007	0.179236	7.41663e-15
ENSOCUG00000008341	ADHFE1	-1.32134	0.400163	7.54965e-15
ENSOCUG00000015335	SLC35C1	-1.04721	0.483902	8.0837e-15
ENSOCUG00000012238	NWD2	-2.623	0.16233	8.81368e-15
ENSOCUG00000005614	TTC9	-1.43122	0.370818	9.22182e-15
ENSOCUG00000013019	TJP2	1.53176	2.89139	9.40565e-15
ENSOCUG00000004476	DDX25	1.08074	2.11512	9.97372e-15
ENSOCUG00000006438	SHC4	-2.40601	0.188677	1.0076e-14
ENSOCUG00000025961		2.09559	4.27402	1.0076e-14
ENSOCUG00000036869	SMIM41	-2.43159	0.185361	1.13073e-14
ENSOCUG00000032007	SLITRK4	-1.21902	0.429574	1.21723e-14
ENSOCUG00000008691	B3GNT5	1.27473	2.41953	1.22907e-14
ENSOCUG00000010773	MRVI1	1.53289	2.89365	1.25097e-14
ENSOCUG00000014406		-1.40521	0.377563	1.33482e-14
ENSOCUG00000021916	TSC22D4	-1.0801	0.472996	1.41267e-14
ENSOCUG00000006069	DMRTA1	4.0718	16.8165	1.58572e-14
ENSOCUG00000038723		4.00052	16.0058	1.62217e-14
ENSOCUG00000003186	HPRT1	-1.4261	0.372136	1.67955e-14
ENSOCUG00000007039	C4A	-1.31339	0.402373	1.71957e-14
ENSOCUG00000026390	TRIM77	-4.95378	0.0322675	1.76216e-14
ENSOCUG00000015569	ANKS1A	-1.01902	0.493451	1.82897e-14
ENSOCUG00000014744	WNT16	4.82499	28.3443	1.90798e-14
ENSOCUG00000012067	SOX10	-4.83068	0.0351414	2.14694e-14
ENSOCUG00000009155	MAP3K1	-1.14367	0.452606	2.16461e-14
ENSOCUG00000003439	DAG1	-1.25631	0.418613	2.19727e-14
ENSOCUG00000012993	PCGF5	1.19079	2.28277	2.24849e-14
ENSOCUG00000007014	SH3D19	-1.42579	0.372216	2.30656e-14
ENSOCUG00000014421	MPZ	-2.97771	0.126946	2.35542e-14
ENSOCUG00000016167	OCRL	-1.00955	0.496702	2.35542e-14
ENSOCUG00000017242	PDGFC	-1.63143	0.322769	2.39715e-14
ENSOCUG00000016573	CPVL	1.83111	3.5581	2.45462e-14
ENSOCUG00000026994	TUBA4A	2.53395	5.79156	2.45462e-14
ENSOCUG00000014561	CDH20	1.82575	3.5449	2.4686e-14
ENSOCUG00000033613	PON3	2.27321	4.83399	2.5548e-14
ENSOCUG00000023702		-1.28239	0.411113	2.67021e-14
ENSOCUG00000002486	COL6A6	-1.92929	0.262558	2.75354e-14
ENSOCUG00000007359	GRM3	-2.66614	0.157548	2.76791e-14
ENSOCUG00000017826	FDX1	-1.3125	0.402622	3.04845e-14
ENSOCUG00000017881	MAPK15	1.61034	3.05323	3.20774e-14
ENSOCUG00000004939	ATP2B2	2.9517	7.73658	3.28488e-14
ENSOCUG00000016171	CDH23	-2.86827	0.136951	3.39289e-14
ENSOCUG00000024996	CLIC6	2.65726	6.30834	3.511e-14
ENSOCUG00000038633		-8.60936	0.00256049	3.67454e-14
ENSOCUG00000001145	GRIP2	1.89935	3.73045	3.97451e-14
ENSOCUG00000010435	SUSD1	-1.51324	0.350323	3.97674e-14
ENSOCUG00000002913	BCORL1	-1.53201	0.345795	4.46777e-14
ENSOCUG00000014482	PLXDC2	-2.28379	0.205358	4.67562e-14
ENSOCUG00000013992	TSPAN15	2.01349	4.03757	4.74308e-14
ENSOCUG00000014676	LAMB1	-1.20908	0.432544	5.29715e-14
ENSOCUG00000015935	TCF7	1.56839	2.96575	5.46614e-14
ENSOCUG00000000371	TTC38	-1.2703	0.414573	5.91941e-14
ENSOCUG00000013948	ARHGAP20	-1.58299	0.333788	6.26986e-14
ENSOCUG00000012033	OC90	-3.06311	0.11965	6.31063e-14
ENSOCUG00000009790	ERBB4	-2.55051	0.170695	6.90749e-14
ENSOCUG00000023350		-1.56253	0.338557	7.15734e-14
ENSOCUG00000023355	MYO7A	-2.09051	0.234798	7.4201e-14
ENSOCUG00000015037	UGT8	-2.24924	0.210334	7.49175e-14
ENSOCUG00000003431	BMP6	-1.9741	0.254528	7.62699e-14
ENSOCUG00000038614		1.60469	3.04131	7.69638e-14
ENSOCUG00000007985	STC2	1.04077	2.05733	7.98566e-14
ENSOCUG00000013514	MGST1	-1.72	0.303548	8.21878e-14
ENSOCUG00000016744	SPOCK2	-1.73576	0.300251	1.03114e-13
ENSOCUG00000012367	COL9A1	-5.62907	0.020206	1.0379e-13
ENSOCUG00000013771	UNC119	-1.22507	0.427776	1.20047e-13
ENSOCUG00000010093		-1.02111	0.492737	1.31983e-13
ENSOCUG00000029657	SERPINA9	4.55715	23.5418	1.36547e-13
ENSOCUG00000006729	GRK3	1.18133	2.26785	1.42859e-13
ENSOCUG00000006714	MMP2	-1.26521	0.416038	1.4524e-13
ENSOCUG00000014409	CCDC15	-1.19975	0.435351	1.45725e-13
ENSOCUG00000004197		2.25921	4.78729	1.55386e-13
ENSOCUG00000017601	CDH19	-1.82057	0.283108	1.61342e-13
ENSOCUG00000027759	LOC100356569	-1.83839	0.279634	1.71153e-13
ENSOCUG00000016995	RPE	1.16978	2.24978	1.78267e-13
ENSOCUG00000004569	ANXA11	-1.06736	0.477192	1.8555e-13
ENSOCUG00000012419	KCNJ6	4.54305	23.3127	2.00476e-13
ENSOCUG00000000875	FAM124A	-2.03163	0.244579	2.23934e-13
ENSOCUG00000006957	IL1R1	-1.73203	0.301029	2.24951e-13
ENSOCUG00000016883	FERMT1	2.20005	4.59497	2.45769e-13
ENSOCUG00000014610	ABCC4	1.45269	2.73717	2.87318e-13
ENSOCUG00000023252		-2.36322	0.194357	2.87318e-13
ENSOCUG00000014705	NEU2	3.60866	12.1988	2.89678e-13
ENSOCUG00000039581		-2.25638	0.209296	3.01858e-13
ENSOCUG00000000821	TACC2	-1.14004	0.453746	3.18838e-13
DTOCUGWNT6	WNT6	1.85656	3.62142	3.19857e-13
ENSOCUG00000012088	EMX2	1.6494	3.13703	3.39806e-13
ENSOCUG00000015550	ASTN1	2.21659	4.64793	3.64154e-13
ENSOCUG00000027150		-5.22427	0.0267509	3.64154e-13
ENSOCUG00000016211	SNTB1	-1.37782	0.3848	3.96892e-13
ENSOCUG00000006539	ATP2B4	-1.75685	0.295893	3.98051e-13
ENSOCUG00000006316	PLEKHO1	-1.30343	0.405161	4.14077e-13
ENSOCUG00000016659	EMB	-4.08671	0.0588541	4.53589e-13
ENSOCUG00000003063	ALDH5A1	1.2867	2.43969	4.65764e-13
ENSOCUG00000015387		-2.14516	0.22607	4.73663e-13
ENSOCUG00000014946	RASD1	2.53618	5.80049	4.9864e-13
ENSOCUG00000025091	AARD	-1.56644	0.337641	5.18668e-13
ENSOCUG00000002798	ABHD12	-1.06114	0.479253	5.26455e-13
ENSOCUG00000010266	MYO3B	2.8031	6.97938	5.29916e-13
ENSOCUG00000026894	TM6SF1	-3.46777	0.0903851	5.43263e-13
ENSOCUG00000026378	GDPD5	-1.17624	0.442503	5.93887e-13
ENSOCUG00000014052	LSAMP	1.01808	2.02523	6.05282e-13
ENSOCUG00000026416	CYP4F2	2.21373	4.63873	6.2103e-13
ENSOCUG00000022669	LOC100358819	1.28549	2.43765	6.41511e-13
ENSOCUG00000037671		-1.24395	0.422216	6.48523e-13
ENSOCUG00000005293	DYNC2LI1	1.51371	2.85543	6.7189e-13
ENSOCUG00000002671	IDH1	-1.18522	0.439759	6.91358e-13
ENSOCUG00000007901	SEMA6D	-1.74305	0.298737	7.20907e-13
ENSOCUG00000011332	PACSIN1	1.17993	2.26566	7.55721e-13
ENSOCUG00000015049	DTX4	-1.28061	0.411621	7.64795e-13
ENSOCUG00000013725	FAM20A	1.54974	2.92765	8.2552e-13
ENSOCUG00000010843	PRKCD	-1.30222	0.405503	8.37828e-13
ENSOCUG00000014800	PLP1	-1.35127	0.391948	8.62732e-13
ENSOCUG00000001601	SLC18B1	1.27592	2.42153	8.93439e-13
ENSOCUG00000014725	SLC22A24	5.33473	40.3565	8.93439e-13
ENSOCUG00000024789	LPAR3	-2.26179	0.208513	9.18317e-13
ENSOCUG00000006048	MICAL1	-1.36575	0.388032	9.57347e-13
ENSOCUG00000003157	DCBLD1	-1.19975	0.435352	1.01207e-12
ENSOCUG00000023931	BGN	-1.81385	0.28443	1.06722e-12
ENSOCUG00000011971	DCP1A	-1.10573	0.464667	1.06722e-12
ENSOCUG00000011224	RNF24	-1.6014	0.329557	1.06722e-12
ENSOCUG00000002399	PNCK	-3.16143	0.111767	1.10553e-12
ENSOCUG00000008699	COL22A1	-1.36985	0.386931	1.19754e-12
ENSOCUG00000008261	NXT2	-1.35288	0.391509	1.23299e-12
ENSOCUG00000004645	WHRN	-1.17652	0.442417	1.23558e-12
ENSOCUG00000012201	PPAT	-1.24504	0.421896	1.37423e-12
ENSOCUG00000009788	WDR49	2.77957	6.86647	1.52382e-12
ENSOCUG00000011780	CYFIP2	-1.93018	0.262397	1.52483e-12
ENSOCUG00000009858	KLHL30	-1.98342	0.252889	1.69454e-12
ENSOCUG00000029526	LOC103348242	-1.80126	0.286924	1.99076e-12
ENSOCUG00000016227	SVEP1	-2.42662	0.186	2.11838e-12
ENSOCUG00000029637	OASL	1.39181	2.62408	2.4654e-12
ENSOCUG00000006783	VWF	-2.33576	0.198091	2.50877e-12
ENSOCUG00000017587	LRRC4C	-1.53532	0.345003	2.51737e-12
ENSOCUG00000031504		2.13072	4.37937	2.51737e-12
ENSOCUG00000022868	AMY2A	3.30306	9.87006	2.55427e-12
ENSOCUG00000012279	ARMH4	-1.38013	0.384185	2.75986e-12
ENSOCUG00000002630	HAPLN1	1.49369	2.81609	2.86525e-12
ENSOCUG00000015162	MFAP4	-1.2463	0.421528	2.93671e-12
ENSOCUG00000012041	HNF4G	3.74885	13.4436	2.97816e-12
ENSOCUG00000014028	RAMACL	-4.80331	0.0358145	3.06688e-12
ENSOCUG00000007043	TAOK3	-1.31912	0.400778	3.14343e-12
ENSOCUG00000004222	SLC22A3	-1.47942	0.358634	3.20922e-12
ENSOCUG00000013309	TRHDE	-1.45973	0.363562	3.30779e-12
ENSOCUG00000009258	AMIGO2	1.53167	2.89119	3.35031e-12
ENSOCUG00000021148	SHISA9	2.07623	4.21704	3.3905e-12
ENSOCUG00000007504	VSTM4	-1.94339	0.260005	3.50962e-12
ENSOCUG00000016815	ICA1	1.50728	2.84275	3.585e-12
ENSOCUG00000006461	GALK2	-1.23331	0.425341	3.61722e-12
ENSOCUG00000035533		3.07473	8.42529	3.6879e-12
ENSOCUG00000009838	FIGN	-1.7615	0.294941	3.78108e-12
ENSOCUG00000008181	CPE	1.59612	3.02329	3.78108e-12
ENSOCUG00000008662	KHK	-1.38696	0.38237	3.79488e-12
ENSOCUG00000022981	ATP6V1C2	1.65176	3.14217	3.99776e-12
ENSOCUG00000001360	GAB3	1.41513	2.66683	4.07279e-12
ENSOCUG00000013668	PLPPR1	1.54388	2.91578	4.07933e-12
ENSOCUG00000016703	TRERF1	-1.1767	0.442363	4.2073e-12
ENSOCUG00000004459	KCNA1	-9.07798	0.00185036	4.4284e-12
ENSOCUG00000011124	FGF18	1.77533	3.42316	4.84312e-12
ENSOCUG00000007635	NGFR	-2.62814	0.161752	4.96767e-12
ENSOCUG00000010782	LRRC8C	-1.42612	0.372131	5.21955e-12
ENSOCUG00000014231	TPBGL	-1.97859	0.253739	5.27277e-12
ENSOCUG00000005112	FBXO32	-1.19268	0.437489	5.48418e-12
ENSOCUG00000008610	DPYD	1.24125	2.36403	5.5379e-12
ENSOCUG00000008635	MAN1C1	-1.16914	0.444687	5.87834e-12
ENSOCUG00000005520	CLDN11	-2.41988	0.186871	6.05352e-12
ENSOCUG00000025094	USP26	2.3515	5.10354	6.27399e-12
ENSOCUG00000001183	SH3GL2	1.91892	3.78139	7.50024e-12
ENSOCUG00000038309	LOC103344996	3.72175	13.1935	7.52036e-12
ENSOCUG00000016135	ZCCHC12	2.084	4.23982	7.63121e-12
ENSOCUG00000011878	SLC35F2	-1.53641	0.344741	8.49259e-12
ENSOCUG00000000174	EXOC6	-1.52721	0.346948	8.86476e-12
ENSOCUG00000013971	AOX1	-1.69604	0.308633	9.30889e-12
ENSOCUG00000037331		-2.64449	0.15993	9.32998e-12
ENSOCUG00000004165	IRF1	1.08207	2.11707	9.88418e-12
ENSOCUG00000010696	NTRK1	1.92095	3.78671	9.89427e-12
ENSOCUG00000001082	CLIP4	-1.81385	0.284432	1.00095e-11
ENSOCUG00000001799	EPB41L2	-1.40196	0.378414	1.02397e-11
ENSOCUG00000000310	IGDCC3	1.36087	2.56841	1.09958e-11
ENSOCUG00000009729	RNF43	1.7332	3.32465	1.14899e-11
ENSOCUG00000007990	OSBPL3	-1.4713	0.360658	1.16641e-11
ENSOCUG00000006264		1.74223	3.34551	1.2045e-11
ENSOCUG00000007344	DSE	1.218	2.32624	1.30211e-11
ENSOCUG00000004825	DRD1	2.01676	4.04673	1.32719e-11
ENSOCUG00000001020	GNAI1	1.06084	2.08614	1.37483e-11
ENSOCUG00000001103	CASP1	3.28739	9.76343	1.38796e-11
ENSOCUG00000001913	LDHD	-1.1797	0.441445	1.42031e-11
ENSOCUG00000013760	NEURL1	-2.29067	0.204381	1.43479e-11
ENSOCUG00000015752	ACSS3	-1.03845	0.48685	1.43594e-11
ENSOCUG00000005507	GNA14	-1.52537	0.347391	1.5142e-11
ENSOCUG00000012003	CCDC173	1.59417	3.01922	1.51598e-11
ENSOCUG00000010436	LEF1	1.02098	2.02929	1.68385e-11
ENSOCUG00000003810	NYAP1	-1.6542	0.317714	1.83765e-11
ENSOCUG00000002426	NSG1	1.7622	3.39214	1.84067e-11
ENSOCUG00000022537		1.39893	2.63706	1.85713e-11
ENSOCUG00000004978	CRTAC1	2.13031	4.37811	1.87049e-11
ENSOCUG00000005927	ACSM5	2.82878	7.10472	1.94405e-11
ENSOCUG00000029398	SALL3	5.05862	33.3271	1.97258e-11
ENSOCUG00000004791	PCED1B	-1.41959	0.373819	2.10584e-11
ENSOCUG00000013125	ACSS1	-1.4	0.378929	2.17547e-11
ENSOCUG00000016027	SLC11A1	2.11074	4.31913	2.17547e-11
ENSOCUG00000014466		1.55399	2.93628	2.18094e-11
ENSOCUG00000011779	TNFRSF19	-1.20905	0.432555	2.23483e-11
ENSOCUG00000029659	PASD1	2.19945	4.59305	2.37561e-11
ENSOCUG00000012132	CHST2	1.07626	2.10856	2.41964e-11
ENSOCUG00000006299	ARVCF	-1.01574	0.494576	2.45422e-11
ENSOCUG00000012589	SMPDL3B	1.07923	2.11291	2.52681e-11
ENSOCUG00000036245		-1.04632	0.484203	2.56198e-11
ENSOCUG00000025956	SDC1	1.14796	2.21601	2.63152e-11
ENSOCUG00000024474	LOC100341843	-1.42379	0.372733	2.86966e-11
ENSOCUG00000010918		-1.57426	0.335816	2.87696e-11
ENSOCUG00000016676	MAMLD1	-1.41853	0.374092	3.03898e-11
ENSOCUG00000004497	TAF7L	-4.73345	0.0375916	3.15695e-11
ENSOCUG00000002828	IGFBP4	-1.73702	0.299988	3.31833e-11
ENSOCUG00000013625	PRSS12	-2.15513	0.224513	3.41837e-11
ENSOCUG00000039434		-1.91201	0.265723	3.55814e-11
ENSOCUG00000010109	BIRC3	-1.9218	0.263924	3.95031e-11
ENSOCUG00000022422	COLCA2	2.39673	5.26608	4.05939e-11
ENSOCUG00000029346	CALY	1.73988	3.34008	4.09076e-11
ENSOCUG00000011141	RET	2.08739	4.24979	4.1128e-11
ENSOCUG00000011816	HPD	2.50081	5.66001	4.12502e-11
ENSOCUG00000035654	AOX3	-1.29056	0.408794	4.15355e-11
ENSOCUG00000025680	LRRC75A	-1.34741	0.392997	4.28871e-11
ENSOCUG00000012086	SLC22A16	2.01983	4.05537	4.44298e-11
ENSOCUG00000025188	HDAC10	-1.33011	0.397737	4.57959e-11
ENSOCUG00000011736	CA3	-2.98319	0.126465	4.71612e-11
ENSOCUG00000007001	CPA1	5.75899	54.1536	5.00111e-11
ENSOCUG00000013436	NHS	-1.46263	0.362832	5.05103e-11
ENSOCUG00000010880	ARSK	-1.0694	0.476516	5.23727e-11
ENSOCUG00000016262	ELAVL4	1.70304	3.25586	5.48116e-11
ENSOCUG00000023270	CHST3	-1.06191	0.478997	5.56058e-11
ENSOCUG00000009825	BPHL	1.0493	2.06952	5.65567e-11
ENSOCUG00000015054	UNC5C	-2.09789	0.233599	5.77343e-11
ENSOCUG00000021974		-2.92936	0.131273	5.91474e-11
ENSOCUG00000011278	SCHIP1	1.1598	2.23427	6.07747e-11
ENSOCUG00000004455	GUCY1A1	-1.2337	0.425225	6.22716e-11
ENSOCUG00000002260	ACSS2	-1.2178	0.429937	6.56731e-11
ENSOCUG00000009149	ECHDC3	-1.37466	0.385645	6.84236e-11
ENSOCUG00000009608	SPRY2	1.14655	2.21384	6.95561e-11
ENSOCUG00000012458	FUT9	2.65611	6.30329	7.03633e-11
ENSOCUG00000011745	HSPA2	-1.00261	0.499096	7.17187e-11
ENSOCUG00000007900	RCOR2	1.17675	2.26067	7.31264e-11
ENSOCUG00000007893	GPAM	-1.02485	0.49146	7.63499e-11
ENSOCUG00000002805	AMPD3	1.69666	3.24149	7.66439e-11
ENSOCUG00000011415	TGFB3	-2.42593	0.18609	7.66439e-11
ENSOCUG00000005027	PNP	1.21982	2.32917	7.93037e-11
ENSOCUG00000003734	TRPM6	1.81903	3.52844	7.94747e-11
ENSOCUG00000025123	GCNT4	-2.73294	0.150419	8.3737e-11
ENSOCUG00000029576	CTNNA2	-1.53962	0.343976	8.52962e-11
ENSOCUG00000016107	EFNA5	-1.321	0.400257	8.83336e-11
ENSOCUG00000007190	CYGB	-1.33002	0.397762	9.35447e-11
ENSOCUG00000030703		-1.59059	0.332036	9.55637e-11
ENSOCUG00000000508	OLFM3	1.43169	2.69763	9.69335e-11
ENSOCUG00000033354	APELA	2.88348	7.37927	9.73295e-11
ENSOCUG00000004461	CDH9	5.22839	37.4888	1.0117e-10
ENSOCUG00000004905	PLEKHD1	2.95023	7.72874	1.03813e-10
ENSOCUG00000016266	BID	1.37567	2.59488	1.04677e-10
ENSOCUG00000007642	DEPTOR	-1.78287	0.290604	1.05625e-10
ENSOCUG00000008543	TNN	-2.38162	0.191893	1.09992e-10
ENSOCUG00000030403	TRAIP	3.9158	15.0929	1.14055e-10
ENSOCUG00000016289	HPGD	-1.17311	0.443464	1.14818e-10
ENSOCUG00000011941	HVCN1	-1.41682	0.374536	1.19153e-10
ENSOCUG00000002613	VCAN	-2.02691	0.24538	1.19371e-10
ENSOCUG00000002301	CCNB1IP1	1.27184	2.41469	1.22021e-10
ENSOCUG00000002510	SNCB	-3.90692	0.0666654	1.2625e-10
ENSOCUG00000027997	TESC	-5.07316	0.0297049	1.28442e-10
ENSOCUG00000005671	SLC9B1	1.44226	2.71746	1.33771e-10
ENSOCUG00000014119	HOXD3	-1.33664	0.395941	1.41729e-10
ENSOCUG00000006817	HORMAD2	2.32585	5.01361	1.43749e-10
ENSOCUG00000038763	ATOX1	-1.78839	0.289494	1.54082e-10
ENSOCUG00000024112	LGALS3BP	-1.14615	0.45183	1.56484e-10
ENSOCUG00000003761	PHF11	1.26776	2.40788	1.60369e-10
ENSOCUG00000006248	IL15RA	-2.82047	0.141564	1.63913e-10
ENSOCUG00000002057	AHSG	-3.81888	0.07086	1.68234e-10
ENSOCUG00000002754	ABCC3	-1.12473	0.458588	1.75192e-10
ENSOCUG00000016757	EXPH5	-2.19627	0.218201	1.77088e-10
ENSOCUG00000014454	PARP8	-1.18539	0.439705	1.87978e-10
ENSOCUG00000026978	PROKR1	-2.32547	0.19951	2.01459e-10
ENSOCUG00000032359		-5.50684	0.0219926	2.07528e-10
ENSOCUG00000015347	TMEM108	1.75785	3.38193	2.08161e-10
ENSOCUG00000022248	RUFY4	2.97383	7.85619	2.08647e-10
ENSOCUG00000000798	H6PD	-1.12555	0.458327	2.12902e-10
ENSOCUG00000017015	ZFAT	-1.17515	0.442839	2.15718e-10
ENSOCUG00000008312	STMN2	3.0593	8.33567	2.22282e-10
ENSOCUG00000039099		1.67454	3.19218	2.22282e-10
ENSOCUG00000017871	ACTN2	1.57056	2.97019	2.22801e-10
ENSOCUG00000006860	GLDN	1.99657	3.99049	2.28404e-10
ENSOCUG00000012333	GOT1	-1.00925	0.496806	2.35583e-10
ENSOCUG00000000863	ASTN2	-1.31677	0.401433	2.43697e-10
ENSOCUG00000022273		2.75411	6.74637	2.46285e-10
ENSOCUG00000029611	IL7	-4.26096	0.0521584	2.46514e-10
ENSOCUG00000023070	ZYG11A	1.92919	3.80842	2.57713e-10
ENSOCUG00000006872	EMILIN1	-1.11285	0.462379	2.59928e-10
ENSOCUG00000009047	FCRL2	3.75541	13.5049	2.59932e-10
ENSOCUG00000031409	PCOLCE	-1.43932	0.368741	2.6075e-10
ENSOCUG00000005991	ALPK3	-1.98814	0.252063	2.73283e-10
ENSOCUG00000026551	LPAR5	1.56323	2.95514	2.79327e-10
ENSOCUG00000013806	SORT1	-1.42559	0.372266	2.82282e-10
ENSOCUG00000016197	RHBDL2	-1.43677	0.369394	3.12525e-10
ENSOCUG00000025825		-2.69171	0.15478	3.13553e-10
ENSOCUG00000006310	PPM1J	2.30321	4.93556	3.16711e-10
ENSOCUG00000008926	CNTNAP3C	2.75543	6.75254	3.41704e-10
ENSOCUG00000037357	TRIM16	-1.2135	0.431222	3.50038e-10
ENSOCUG00000015247	ZDHHC14	1.23965	2.36141	3.50038e-10
ENSOCUG00000025314	GABRA4	1.46213	2.75515	3.56989e-10
ENSOCUG00000009702	FMOD	-2.04553	0.242233	3.84328e-10
ENSOCUG00000017461	MYO3A	2.43094	5.39244	3.94076e-10
ENSOCUG00000004261	SLC35G1	-1.1728	0.443559	3.94348e-10
ENSOCUG00000002431	KCNC4	-4.05696	0.0600805	3.98171e-10
ENSOCUG00000003333	LIFR	-1.56352	0.338324	4.22598e-10
ENSOCUG00000000732	FGF9	-1.0957	0.467908	4.35293e-10
ENSOCUG00000010749	PLEKHG4B	2.22337	4.66984	4.4379e-10
ENSOCUG00000035732		-2.22574	0.213789	4.47056e-10
ENSOCUG00000022033	ITLN1	2.1838	4.5435	4.63633e-10
ENSOCUG00000012881	COL1A1	-2.33742	0.197864	4.73511e-10
ENSOCUG00000012034	RBM47	-1.83371	0.280543	5.09615e-10
ENSOCUG00000008102	MTSS1	1.08402	2.11994	5.11406e-10
ENSOCUG00000038697		-2.09512	0.234049	5.27227e-10
ENSOCUG00000028985	DEFB116	-3.76231	0.0736941	5.45719e-10
ENSOCUG00000022810	USP51	-1.04706	0.483955	5.78748e-10
ENSOCUG00000014920	SPRY1	-1.37618	0.385238	5.82229e-10
ENSOCUG00000016177	EPB41L4B	1.17155	2.25254	5.99727e-10
ENSOCUG00000022473		1.73779	3.33524	6.89955e-10
ENSOCUG00000002473	OLFML2A	-1.52345	0.347853	7.1615e-10
ENSOCUG00000011091	GALNT10	-1.4637	0.362563	7.16639e-10
ENSOCUG00000012557	SOX6	-1.99859	0.250245	7.17264e-10
ENSOCUG00000030440		-3.05182	0.12059	7.1819e-10
ENSOCUG00000014499	CLSTN3	1.30442	2.46984	7.46887e-10
ENSOCUG00000022347	HENMT1	2.11279	4.32527	7.69868e-10
ENSOCUG00000007336	TMX4	-1.07984	0.473082	7.71197e-10
ENSOCUG00000007427	FAT3	-2.88649	0.135232	7.83357e-10
ENSOCUG00000005098	STK10	-1.08953	0.469914	7.84841e-10
ENSOCUG00000000973	CALN1	2.65169	6.28405	7.89471e-10
ENSOCUG00000027445	TCIM	1.43101	2.69636	8.19033e-10
ENSOCUG00000001186	ZDHHC8	-1.13128	0.456512	8.19033e-10
ENSOCUG00000006280	CDSN	2.38476	5.22256	8.40611e-10
ENSOCUG00000009041	BOD1L1	-1.28637	0.409982	8.57466e-10
ENSOCUG00000017565	KCP	-1.79345	0.28848	8.57466e-10
ENSOCUG00000025219	OAF	-1.34506	0.393638	8.57466e-10
ENSOCUG00000027943	C19orf38	-1.78444	0.290288	8.69405e-10
ENSOCUG00000034698	CLDN22	-1.27445	0.413384	8.73219e-10
ENSOCUG00000017236	LRRC2	-1.8335	0.280583	8.74584e-10
ENSOCUG00000001316	ESRP1	2.04335	4.122	8.89129e-10
ENSOCUG00000011808	STARD13	-1.85761	0.275934	9.15112e-10
ENSOCUG00000025119	RELT	1.41955	2.67502	9.26843e-10
ENSOCUG00000013642	DOCK11	-1.5635	0.338329	9.34425e-10
ENSOCUG00000007461	NAV1	-1.52255	0.348071	9.41579e-10
ENSOCUG00000014251	WDR31	1.20608	2.3071	9.524e-10
ENSOCUG00000005310	PRMT8	4.05967	16.6757	1.05155e-09
ENSOCUG00000000688	FBXO27	1.08603	2.1229	1.06798e-09
ENSOCUG00000006207	BTBD7	-1.21582	0.430528	1.17385e-09
ENSOCUG00000023878	SYNE1	-2.12306	0.229559	1.18136e-09
ENSOCUG00000013856	OTUD7A	1.51951	2.86693	1.28388e-09
ENSOCUG00000013232	COL4A1	-1.7895	0.289272	1.29004e-09
ENSOCUG00000017120	PDK4	-2.83421	0.140222	1.29307e-09
ENSOCUG00000017147	CDS1	-1.52199	0.348206	1.30512e-09
ENSOCUG00000025543	LOC100359247	3.63715	12.4421	1.35382e-09
ENSOCUG00000022007	ISLR	-1.43904	0.368813	1.43552e-09
ENSOCUG00000016259	DDIT4L	2.13529	4.39325	1.4554e-09
ENSOCUG00000014066	SLC6A15	1.69633	3.24075	1.50782e-09
ENSOCUG00000009469		1.38271	2.60758	1.55938e-09
ENSOCUG00000029183	UBAP1L	-1.94071	0.260488	1.56238e-09
ENSOCUG00000006877	TFCP2L1	2.29407	4.90437	1.60505e-09
ENSOCUG00000004430	LOC100350827	6.24073	75.6219	1.67123e-09
ENSOCUG00000016497	COL11A2	-1.78058	0.291066	1.70331e-09
ENSOCUG00000010987	TMEM26	-1.25526	0.418919	1.83257e-09
ENSOCUG00000002244	AMPH	3.01838	8.10255	1.83459e-09
ENSOCUG00000012389	CCDC126	-1.10677	0.464332	1.84057e-09
ENSOCUG00000011348	CHPF	-1.01	0.496545	1.88986e-09
ENSOCUG00000003831	C4orf19	1.77375	3.41941	1.93801e-09
ENSOCUG00000016904	PLXNC1	-2.04182	0.242858	1.94486e-09
ENSOCUG00000034315		2.40623	5.30088	1.94542e-09
ENSOCUG00000015280	CYP2C2	4.02707	16.303	1.95062e-09
ENSOCUG00000022288	EDARADD	1.50996	2.84803	2.05479e-09
ENSOCUG00000001555	ACE	-2.83454	0.140191	2.09453e-09
ENSOCUG00000015605	PITPNC1	-1.17908	0.441632	2.1378e-09
ENSOCUG00000005904		1.7279	3.31245	2.16687e-09
ENSOCUG00000009724	FAIM	1.10877	2.15662	2.17318e-09
ENSOCUG00000011234	FSHR	-8.31508	0.00313986	2.17508e-09
ENSOCUG00000014646	FEZ1	1.19121	2.28344	2.18166e-09
ENSOCUG00000016829	GPX6	1.6589	3.15775	2.23927e-09
ENSOCUG00000006661	TRIM47	-1.23959	0.423494	2.25709e-09
ENSOCUG00000002204	IGLON5	1.58505	3.00019	2.27621e-09
ENSOCUG00000029212	TTC38	-1.39367	0.380595	2.28111e-09
ENSOCUG00000013919	FGD4	-1.66099	0.316222	2.58895e-09
ENSOCUG00000013769	SH3PXD2A	-2.02747	0.245284	2.68412e-09
ENSOCUG00000009332	MCOLN3	-2.73363	0.150347	2.68604e-09
ENSOCUG00000003973	IFT57	1.20178	2.30023	2.6868e-09
ENSOCUG00000001887	TMEM245	-1.29981	0.40618	2.76112e-09
ENSOCUG00000007262	BEND6	-1.89219	0.269398	2.79169e-09
ENSOCUG00000006822	CCSAP	-1.14082	0.453501	2.82741e-09
ENSOCUG00000003307	BIRC7	-1.58314	0.333756	2.84664e-09
ENSOCUG00000001212	JUN	-1.36104	0.389301	2.86797e-09
ENSOCUG00000008307	CD1A	-1.09308	0.468759	2.87254e-09
ENSOCUG00000013280	ARHGEF3	-1.36027	0.389509	2.87399e-09
ENSOCUG00000027853	PGAM2	-1.26483	0.416148	2.95371e-09
ENSOCUG00000034816		1.75364	3.37209	3.07658e-09
ENSOCUG00000006124	LNP1	-3.46354	0.0906503	3.16055e-09
ENSOCUG00000004278	ROBO2	-2.1095	0.231728	3.1923e-09
ENSOCUG00000001018		4.13859	17.6133	3.25536e-09
ENSOCUG00000011276	TMA16	1.0017	2.00236	3.31694e-09
ENSOCUG00000012786	TMEM47	-1.46301	0.362735	3.43071e-09
ENSOCUG00000006756	SH3BGRL2	1.38654	2.6145	3.49879e-09
ENSOCUG00000017362	NETO2	-1.43789	0.369106	3.60884e-09
ENSOCUG00000035685	PLK2	1.72664	3.30957	3.69584e-09
ENSOCUG00000006953	SLC29A3	-1.06662	0.477435	3.80056e-09
ENSOCUG00000029623	ATP2B3	1.30086	2.46375	3.81693e-09
ENSOCUG00000011186	SRPX2	-1.3681	0.387401	4.20618e-09
ENSOCUG00000023401	ADH4	2.5488	5.85149	4.32899e-09
ENSOCUG00000010747	ZNF385A	1.08757	2.12516	4.34406e-09
ENSOCUG00000017653	CBS	1.50129	2.83096	4.45431e-09
ENSOCUG00000007240	ST8SIA6	4.00373	16.0414	4.45691e-09
ENSOCUG00000033346		2.36652	5.15697	4.45691e-09
ENSOCUG00000005799	CCDC110	-2.76576	0.147036	4.96754e-09
ENSOCUG00000014794	ATP2A3	-1.99388	0.251063	4.98895e-09
ENSOCUG00000003823	SYTL3	-1.61537	0.326382	5.09525e-09
ENSOCUG00000026694	CPEB1	1.6111	3.05486	5.09943e-09
ENSOCUG00000004532	THRB	-3.33015	0.099432	5.23311e-09
ENSOCUG00000003684	BMERB1	1.29544	2.45451	5.51354e-09
ENSOCUG00000002859	ADAMTS5	-2.08437	0.235799	5.55338e-09
DTOCUGCCND1	CCND1	1.09071	2.12978	6.0689e-09
ENSOCUG00000011919	SEMA3A	-1.22747	0.427065	6.18579e-09
ENSOCUG00000015032	RAPGEF4	-1.62285	0.324694	6.24399e-09
ENSOCUG00000002557	CLSTN2	1.75724	3.38052	6.25354e-09
ENSOCUG00000034940		-1.04104	0.485978	6.25876e-09
ENSOCUG00000002522	PTGFR	1.57302	2.97527	6.38354e-09
ENSOCUG00000010097	LOC100346672	-1.8985	0.268222	6.4063e-09
ENSOCUG00000008182	CCDC136	-1.34502	0.393647	6.55417e-09
ENSOCUG00000038704		-1.07862	0.47348	6.91095e-09
ENSOCUG00000031274	BLACAT1	-1.59187	0.331742	7.0995e-09
ENSOCUG00000009694	SRGAP1	-1.48459	0.357351	7.24868e-09
ENSOCUG00000009998	SGMS2	-1.96077	0.256891	7.25473e-09
ENSOCUG00000033265	C4orf54	1.48217	2.79369	7.3091e-09
ENSOCUG00000021996	CDC42EP1	-1.04857	0.483447	7.71641e-09
ENSOCUG00000009777	GAREM2	1.66018	3.16056	7.81051e-09
ENSOCUG00000002111	FOXB2	7.85234	231.094	7.87832e-09
ENSOCUG00000013059	BHLHB9	-1.20454	0.433908	8.03119e-09
ENSOCUG00000014833	PLA2R1	-2.05161	0.241214	8.56151e-09
ENSOCUG00000004480	CSRP3	-8.42416	0.00291121	8.70256e-09
ENSOCUG00000011476	FAIM2	1.12853	2.18636	8.80423e-09
ENSOCUG00000010325	SLAIN1	-1.18076	0.441119	9.01916e-09
ENSOCUG00000022837		3.28209	9.72764	9.01916e-09
ENSOCUG00000015949	CRB1	-2.23438	0.212513	9.1126e-09
ENSOCUG00000012839	ALS2CL	-1.55666	0.339937	9.25583e-09
ENSOCUG00000002924	LGALS3	1.67661	3.19677	9.30056e-09
ENSOCUG00000017852	AQP3	2.70698	6.52954	9.44874e-09
ENSOCUG00000012328	RNF128	-1.00107	0.499629	9.61818e-09
ENSOCUG00000007683	RALGPS1	-1.35092	0.392043	9.92306e-09
ENSOCUG00000002636	FAM160A1	1.79295	3.46522	1.08676e-08
ENSOCUG00000025694	RALYL	-1.54722	0.342169	1.10228e-08
ENSOCUG00000008657	CGREF1	-3.22829	0.106706	1.16486e-08
ENSOCUG00000014161	ABCC8	3.25547	9.54981	1.1942e-08
ENSOCUG00000010594	CASQ2	-2.71237	0.152579	1.26609e-08
ENSOCUG00000014513	IL27RA	-1.71604	0.304383	1.26609e-08
ENSOCUG00000017203	GNAO1	1.6667	3.17487	1.32016e-08
ENSOCUG00000013011	CDC42EP3	-1.69528	0.308796	1.32398e-08
ENSOCUG00000015051	PPP1R3C	1.29908	2.46073	1.39115e-08
ENSOCUG00000013774	CDH8	1.25186	2.38148	1.40967e-08
ENSOCUG00000017466	BRDT	2.06814	4.19346	1.46372e-08
ENSOCUG00000026775	DEFB123	-3.706	0.0766269	1.50641e-08
ENSOCUG00000009176	ABHD3	-1.39414	0.380471	1.56347e-08
ENSOCUG00000003845	GRIK2	2.44514	5.44577	1.5684e-08
ENSOCUG00000012229	DLGAP3	-1.23409	0.42511	1.58874e-08
ENSOCUG00000022431	PRDM7	5.16943	35.9876	1.58874e-08
ENSOCUG00000017345	LOC100341560	2.54739	5.84577	1.58999e-08
ENSOCUG00000006216	SERPINB6	1.22169	2.33219	1.59077e-08
ENSOCUG00000012693	LDB3	-2.14436	0.226195	1.60454e-08
ENSOCUG00000014832	STEAP2	-1.45903	0.363737	1.63493e-08
ENSOCUG00000010547	HLF	-1.38637	0.382527	1.64992e-08
ENSOCUG00000001617	MTMR8	-1.26272	0.416757	1.66018e-08
ENSOCUG00000029626	LOC100356851	-2.22684	0.213626	1.75321e-08
ENSOCUG00000001660	VWCE	1.51106	2.85019	1.78255e-08
ENSOCUG00000010895	SVIL	-1.20837	0.432757	1.91893e-08
ENSOCUG00000001720	HOXB1	3.31481	9.95076	2.02418e-08
ENSOCUG00000003465	PLPP6	1.22411	2.33612	2.04242e-08
ENSOCUG00000010656	TTC39B	-1.10833	0.463831	2.12169e-08
ENSOCUG00000010692	RBKS	1.12003	2.17352	2.12877e-08
ENSOCUG00000010134	ITPRID2	-1.2711	0.414343	2.19863e-08
ENSOCUG00000031765		3.10577	8.60853	2.21747e-08
ENSOCUG00000010338	CARD19	-1.01444	0.495019	2.38271e-08
ENSOCUG00000009797	ABCA4	1.74546	3.35303	2.39173e-08
ENSOCUG00000017905	PCK1	4.70082	26.0069	2.39217e-08
ENSOCUG00000001910	ADGRL3	-1.3078	0.403938	2.50844e-08
ENSOCUG00000001027	NOBOX	2.2037	4.6066	2.51074e-08
ENSOCUG00000029332	CPN2	3.40081	10.562	2.51312e-08
ENSOCUG00000014829	SYT1	-4.34099	0.0493438	2.55874e-08
ENSOCUG00000001903	NOS2	1.47887	2.7873	2.61426e-08
ENSOCUG00000001968		-1.9953	0.250815	2.61426e-08
ENSOCUG00000014460	PODXL2	-1.43535	0.369758	2.63865e-08
ENSOCUG00000038567		2.95034	7.7293	2.65951e-08
ENSOCUG00000001205	RBFOX1	2.12641	4.36629	2.65955e-08
ENSOCUG00000005422	SNAI1	-1.72279	0.302961	2.7441e-08
ENSOCUG00000014697	BTG3	-1.04967	0.48308	2.77614e-08
ENSOCUG00000022474	Y_RNA	1.59491	3.02076	2.81903e-08
ENSOCUG00000000972	SORCS1	-2.23023	0.213125	2.87125e-08
ENSOCUG00000005893	NFIA	-1.34564	0.393479	2.95765e-08
ENSOCUG00000004106	GLDC	1.63345	3.10254	2.96271e-08
ENSOCUG00000006444	CD109	-1.60602	0.328504	3.07456e-08
ENSOCUG00000022659	EFCC1	1.32873	2.51181	3.20198e-08
ENSOCUG00000006338	DDX43	2.04867	4.13724	3.20323e-08
ENSOCUG00000003441	FAAH	-1.15172	0.450088	3.33247e-08
ENSOCUG00000026354	PGF	-2.2956	0.203684	3.33247e-08
ENSOCUG00000033373		-3.49461	0.0887195	3.45388e-08
ENSOCUG00000011455	PTPRQ	1.82147	3.53441	3.46028e-08
ENSOCUG00000005974	LINGO1	-1.46975	0.361044	3.57153e-08
ENSOCUG00000016068	SERPINE1	-1.49848	0.353925	3.623e-08
ENSOCUG00000008562	BTD	-1.09343	0.468647	3.69619e-08
ENSOCUG00000027971	SYT11	-1.18251	0.440585	3.70168e-08
ENSOCUG00000017884	VEGFC	-1.5765	0.335295	3.74456e-08
ENSOCUG00000010709	SPAG4	1.25711	2.39016	3.79874e-08
ENSOCUG00000006983	CPA2	4.00548	16.0609	3.91352e-08
ENSOCUG00000008722	NEXMIF	1.71309	3.27863	3.92819e-08
ENSOCUG00000016435	DPPA4	1.7341	3.32673	3.98336e-08
ENSOCUG00000037996		-4.69705	0.038552	3.99449e-08
ENSOCUG00000026831	LOC100342253	-1.65162	0.318282	4.12419e-08
ENSOCUG00000024509	LOC100343656	1.59357	3.01795	4.17413e-08
ENSOCUG00000003533	RASGRF2	2.03397	4.09529	4.18104e-08
ENSOCUG00000035002		-1.62788	0.323562	4.33114e-08
ENSOCUG00000022143	G3BP1	1.12679	2.18372	4.44909e-08
ENSOCUG00000021320	RRBP1	-1.13473	0.455421	4.56282e-08
ENSOCUG00000013072	UBASH3B	-1.11688	0.461091	4.56941e-08
ENSOCUG00000010167	AVPR1A	-3.25445	0.104788	4.76835e-08
ENSOCUG00000006829	ARHGEF37	1.57492	2.9792	4.78741e-08
ENSOCUG00000000378	SPO11	1.70301	3.25579	4.78741e-08
ENSOCUG00000008805	CDH1	-1.51544	0.34979	4.82266e-08
ENSOCUG00000015617	SLC25A31	2.15478	4.45301	4.82266e-08
ENSOCUG00000014236	NUP210	-1.496	0.354535	5.11979e-08
ENSOCUG00000007131	FAM187B	-4.70502	0.0383397	5.18601e-08
ENSOCUG00000017845	MAB21L1	-4.31686	0.0501759	5.22808e-08
ENSOCUG00000007612	TRIM71	1.77972	3.4336	5.25859e-08
ENSOCUG00000017722	GMPR	-1.47339	0.360136	5.36773e-08
ENSOCUG00000013979	BOLL	2.33787	5.05555	5.58106e-08
ENSOCUG00000013296	GADD45G	1.77608	3.42494	5.7902e-08
ENSOCUG00000034290		2.35968	5.13257	6.08543e-08
ENSOCUG00000015838	COL9A2	-1.38554	0.382746	6.09046e-08
ENSOCUG00000031155		3.30471	9.88133	6.09046e-08
ENSOCUG00000006985	ITLN2	1.9314	3.81425	6.14004e-08
ENSOCUG00000004599	LGI4	-1.38532	0.382804	6.34879e-08
ENSOCUG00000007602	HS3ST1	-2.21538	0.21533	6.51595e-08
ENSOCUG00000007786	LOC100342240	-1.36896	0.38717	6.72893e-08
ENSOCUG00000010383	CD68	-1.58322	0.333736	6.84288e-08
ENSOCUG00000015188	LOC100344284	8.00347	256.616	7.58948e-08
ENSOCUG00000015939	LDHA	1.25254	2.3826	7.68903e-08
ENSOCUG00000013461	CRYL1	1.02536	2.03547	7.85027e-08
ENSOCUG00000010707	PEAR1	-1.41881	0.374022	8.10775e-08
ENSOCUG00000006969	DCN	-1.13362	0.45577	8.1409e-08
ENSOCUG00000013366	CRYBG1	-1.36701	0.387694	8.16997e-08
ENSOCUG00000006811	NLGN3	-1.34804	0.392826	8.16997e-08
ENSOCUG00000030601		4.47252	22.2004	8.34509e-08
ENSOCUG00000004008	CNDP1	1.08357	2.11927	8.47381e-08
ENSOCUG00000016314	TMEM119	-1.73479	0.300453	8.80586e-08
ENSOCUG00000013457	CCKAR	2.23277	4.70035	9.02565e-08
ENSOCUG00000009360	MST1R	2.15015	4.43873	9.79492e-08
ENSOCUG00000038428		2.73253	6.6462	1.01635e-07
ENSOCUG00000007950	CPEB2	-1.4366	0.369438	1.02128e-07
ENSOCUG00000010371	FRZB	-2.32513	0.199557	1.05084e-07
ENSOCUG00000033450		-1.00496	0.498284	1.08106e-07
ENSOCUG00000017310	SLC6A2	2.53085	5.77914	1.11124e-07
ENSOCUG00000008121	RASL11A	-1.57337	0.336024	1.14396e-07
ENSOCUG00000015407	GRAMD1C	1.48265	2.79462	1.15481e-07
ENSOCUG00000027689	ASIC3	2.85079	7.21395	1.16937e-07
ENSOCUG00000021259	CCDC74B	2.3491	5.09505	1.16937e-07
ENSOCUG00000031211		-2.62205	0.162436	1.17864e-07
ENSOCUG00000008330	CSRP2	1.22584	2.33892	1.18216e-07
ENSOCUG00000016740	DPF3	1.23049	2.34647	1.18617e-07
ENSOCUG00000003866	FBN1	-1.69301	0.30928	1.19953e-07
ENSOCUG00000016143	GALNT6	-2.65044	0.159272	1.24083e-07
ENSOCUG00000036859	TRIM6	2.31956	4.9918	1.24083e-07
ENSOCUG00000011766	B3GALT5	1.53703	2.90197	1.24147e-07
ENSOCUG00000009880	DUSP14	1.92858	3.80681	1.25435e-07
ENSOCUG00000036016		1.65271	3.14423	1.27076e-07
ENSOCUG00000015312	PDGFD	1.3226	2.50116	1.27821e-07
ENSOCUG00000014305		-5.0262	0.0306876	1.31249e-07
ENSOCUG00000006637	SLC23A2	1.20231	2.30108	1.33616e-07
ENSOCUG00000007603	CHST15	-1.33847	0.395439	1.34244e-07
ENSOCUG00000001225	METTL24	-1.60449	0.328851	1.39973e-07
ENSOCUG00000036888		-2.53229	0.172864	1.42498e-07
ENSOCUG00000012120	SPARC	-1.7083	0.30602	1.42605e-07
ENSOCUG00000011383	FAM241A	-1.42303	0.372928	1.44199e-07
ENSOCUG00000025617	CDH13	-2.30136	0.202871	1.45594e-07
ENSOCUG00000026389	RASSF10	2.03652	4.10254	1.47055e-07
ENSOCUG00000006791	FAM161B	-1.37717	0.384973	1.50607e-07
ENSOCUG00000005524	TMBIM1	-2.09787	0.233604	1.53371e-07
ENSOCUG00000029449	NUP37	1.09202	2.13173	1.53747e-07
ENSOCUG00000027233	LOC100346308	1.0601	2.08508	1.55028e-07
ENSOCUG00000015699	ASIC1	2.42283	5.36222	1.55835e-07
ENSOCUG00000012989	ADAD1	1.97426	3.92927	1.71634e-07
ENSOCUG00000006290	LRFN5	2.49317	5.63014	1.79817e-07
ENSOCUG00000006448	ABCB9	1.40335	2.64516	1.82823e-07
ENSOCUG00000038550		-1.0296	0.489847	1.83678e-07
ENSOCUG00000032969		2.07528	4.21427	1.87765e-07
ENSOCUG00000001627	SLC6A11	-1.07304	0.475317	1.88847e-07
ENSOCUG00000017547	CACNA1E	1.5485	2.92514	1.88847e-07
ENSOCUG00000003426	WSCD1	-1.41732	0.374407	1.90401e-07
ENSOCUG00000000162	LRRC51	-1.13416	0.455601	1.98425e-07
ENSOCUG00000015248	SHISA2	2.1072	4.30855	2.00413e-07
ENSOCUG00000003579	TEX36	-2.13486	0.22769	2.00903e-07
ENSOCUG00000037851		1.31628	2.49022	2.10964e-07
ENSOCUG00000010754	NIPA1	1.14115	2.20557	2.12996e-07
ENSOCUG00000001012	SLC18A1	3.94529	15.4047	2.25844e-07
ENSOCUG00000016908	PDE8A	-1.25155	0.419996	2.27991e-07
ENSOCUG00000021287	HSPB6	-2.17038	0.222153	2.30949e-07
ENSOCUG00000031212		-3.44605	0.0917561	2.32863e-07
ENSOCUG00000006562	LANCL3	1.18557	2.27454	2.51112e-07
ENSOCUG00000039163		-1.76849	0.293516	2.53024e-07
ENSOCUG00000013047	LAMC1	-1.16926	0.444649	2.59774e-07
ENSOCUG00000008856	HELZ	-1.33961	0.395128	2.65395e-07
ENSOCUG00000011954	UNC13B	-1.22068	0.42908	2.65438e-07
ENSOCUG00000003312	ONECUT1	3.42771	10.7608	2.72057e-07
ENSOCUG00000027653	LSM3	2.12216	4.35346	2.75735e-07
ENSOCUG00000001539	PHYHIPL	1.91824	3.77962	2.7582e-07
ENSOCUG00000011051	TNFSF11	-3.63425	0.0805346	2.76551e-07
ENSOCUG00000000981	INPP5J	-1.33843	0.39545	2.80353e-07
ENSOCUG00000012337	COL21A1	-1.92157	0.263967	2.86771e-07
ENSOCUG00000004500	TACC1	-1.1497	0.450718	2.90056e-07
ENSOCUG00000033841		-1.91135	0.265844	2.90056e-07
ENSOCUG00000008832	CCDC113	1.14356	2.20926	2.90384e-07
ENSOCUG00000036429		7.16074	143.087	3.00956e-07
ENSOCUG00000006220	CLCN3	-1.23766	0.424059	3.08108e-07
ENSOCUG00000000657	KCNH1	1.64104	3.11892	3.1371e-07
ENSOCUG00000001098	DTHD1	-2.86116	0.137627	3.16683e-07
ENSOCUG00000010392	DPEP1	-1.73001	0.30145	3.24432e-07
ENSOCUG00000039353	DPEP1	-1.25516	0.418947	3.24432e-07
ENSOCUG00000001519	RTN4RL1	-1.23117	0.425972	3.39363e-07
ENSOCUG00000016585	SH2D4A	1.38634	2.61414	3.47151e-07
ENSOCUG00000017243	FAR2	-1.56123	0.338863	3.50398e-07
ENSOCUG00000015536	CXXC4	-1.27522	0.413162	3.53024e-07
ENSOCUG00000015559	DRC1	1.25709	2.39014	3.55234e-07
ENSOCUG00000012907	TBX21	4.0273	16.3057	3.55533e-07
ENSOCUG00000016007	NID1	-1.45091	0.365792	3.59356e-07
ENSOCUG00000022327	CEP70	1.06793	2.09642	3.60784e-07
ENSOCUG00000030475		-2.53607	0.172412	3.60943e-07
ENSOCUG00000006273	ASPHD2	1.87988	3.68045	3.64357e-07
ENSOCUG00000006913	TTLL8	2.012	4.03341	3.73584e-07
ENSOCUG00000015020	COL5A2	-1.73159	0.301119	3.86293e-07
ENSOCUG00000003323	ARHGAP28	1.06476	2.09182	4.06744e-07
ENSOCUG00000036024		2.22267	4.66758	4.08409e-07
ENSOCUG00000006579	SPHK1	-2.17735	0.221081	4.14193e-07
ENSOCUG00000035319	LOC103347371	1.92839	3.80631	4.18779e-07
ENSOCUG00000011932	SEL1L	-1.00376	0.498697	4.29395e-07
ENSOCUG00000024820	OR4E1	7.84586	230.059	4.31946e-07
ENSOCUG00000038017		2.80561	6.99156	4.32155e-07
ENSOCUG00000005237	PCDH17	-1.14826	0.451168	4.3285e-07
ENSOCUG00000001597	ADAMDEC1	-3.3246	0.0998148	4.55502e-07
ENSOCUG00000027610	SOX11	1.08928	2.12768	4.55628e-07
ENSOCUG00000023100	CAPN12	-1.07872	0.473448	4.57385e-07
ENSOCUG00000011000	GAS7	-1.30099	0.405847	4.64203e-07
ENSOCUG00000017197	CLDN6	1.87433	3.66631	4.72867e-07
ENSOCUG00000016936	MMRN2	-1.47819	0.35894	4.74248e-07
ENSOCUG00000013809	B3GNT6	-1.8036	0.286459	4.74853e-07
ENSOCUG00000000491	TDRD5	4.74	26.7228	4.87758e-07
ENSOCUG00000010825	EPB41L4A	1.28299	2.43343	4.88148e-07
ENSOCUG00000032015		5.19204	36.5562	4.97124e-07
ENSOCUG00000032311		1.63541	3.10676	5.00297e-07
ENSOCUG00000005623	SCN9A	1.8408	3.58208	5.01861e-07
ENSOCUG00000013289	PACRG	1.26246	2.39905	5.0427e-07
ENSOCUG00000037091		2.9999	7.99943	5.17386e-07
ENSOCUG00000026197	CTSD	-1.31705	0.401355	5.18158e-07
ENSOCUG00000005722	CERS6	1.23815	2.35896	5.37813e-07
ENSOCUG00000029135	ZFP92	-1.27395	0.413527	5.6185e-07
ENSOCUG00000039045		4.51181	22.8133	5.64807e-07
ENSOCUG00000002425	RYR2	1.9101	3.75836	5.69389e-07
ENSOCUG00000011739	RUNX2	1.0493	2.06953	5.73862e-07
ENSOCUG00000022368	CCDC92	1.23765	2.35813	5.76219e-07
ENSOCUG00000008964	HOXD10	-1.14262	0.452937	5.78595e-07
ENSOCUG00000019211	ocu-mir-145	-1.32149	0.400121	5.99201e-07
ENSOCUG00000023091	PKIB	-1.75391	0.296497	5.9967e-07
ENSOCUG00000007502	ELF3	2.00812	4.02258	6.10873e-07
ENSOCUG00000012542	CACNA2D3	-1.68665	0.310647	6.12123e-07
ENSOCUG00000027254	ATP4B	3.52219	11.489	6.12622e-07
ENSOCUG00000017314	MGAT4C	2.18735	4.5547	6.12622e-07
ENSOCUG00000027976		1.3111	2.48131	6.14763e-07
ENSOCUG00000016522	PDE1A	-1.92215	0.263861	6.26955e-07
ENSOCUG00000026897		1.01802	2.02514	6.26955e-07
ENSOCUG00000011451		4.49047	22.4785	6.43101e-07
ENSOCUG00000024788	LOC100351519	1.20251	2.30139	6.43267e-07
ENSOCUG00000006719	LPCAT2	-1.06489	0.47801	6.55885e-07
ENSOCUG00000015140	DACT1	1.10532	2.15147	6.56348e-07
ENSOCUG00000008930	PLPPR4	-1.49902	0.353794	6.61476e-07
ENSOCUG00000027576	FSD1	2.37009	5.16973	6.71423e-07
ENSOCUG00000017411	ADGRV1	2.23493	4.7074	6.74831e-07
ENSOCUG00000015511	ABHD12B	3.07492	8.42642	7.01532e-07
ENSOCUG00000035624		-1.32308	0.399681	7.14807e-07
ENSOCUG00000002744	HS3ST5	2.58544	6.002	7.40364e-07
ENSOCUG00000023987	ETFBKMT	1.15206	2.2223	7.42073e-07
ENSOCUG00000025327	TDRD1	1.63656	3.10923	7.50923e-07
ENSOCUG00000007162	ELL2	-1.58972	0.332235	7.76047e-07
ENSOCUG00000004238	PERP	2.91673	7.55132	7.82543e-07
ENSOCUG00000009952	NDST3	-1.85893	0.275681	7.83137e-07
ENSOCUG00000013333	HS3ST3A1	-1.85361	0.276699	7.96217e-07
ENSOCUG00000014105	GABRG1	1.55418	2.93666	7.9624e-07
ENSOCUG00000038285	GRIN2A	2.60108	6.0674	8.12721e-07
ENSOCUG00000024309	SMAD7	-1.21102	0.431963	8.3393e-07
ENSOCUG00000007540		2.40269	5.28788	8.48775e-07
ENSOCUG00000025851	CPM	-1.45564	0.364592	8.785e-07
ENSOCUG00000015757	PIM2	-1.31357	0.402325	8.8003e-07
ENSOCUG00000015755	DENND2D	1.30604	2.47262	9.10055e-07
ENSOCUG00000013474	CACNA1D	-1.72692	0.302095	9.16078e-07
ENSOCUG00000024495	GTSF1	2.00251	4.00697	9.30797e-07
ENSOCUG00000000672	EPHA7	-1.28029	0.411713	9.32261e-07
ENSOCUG00000017497	FREM3	-7.19121	0.00684275	9.58594e-07
ENSOCUG00000017910	ZFHX3	-1.5191	0.348904	9.74925e-07
ENSOCUG00000001250	EDNRA	-1.11715	0.461003	9.81091e-07
ENSOCUG00000017233	H1-3	-2.03267	0.244402	1.0151e-06
ENSOCUG00000001215	HIPK3	-1.09454	0.468285	1.02365e-06
ENSOCUG00000024082	ANHX	2.0209	4.05836	1.03546e-06
ENSOCUG00000001230	XDH	1.5595	2.94752	1.03546e-06
ENSOCUG00000016034	OIT3	1.71134	3.27465	1.06221e-06
ENSOCUG00000005324	MAP1A	-1.24932	0.420645	1.06462e-06
ENSOCUG00000002674	KCNG3	-2.37032	0.193403	1.10058e-06
ENSOCUG00000002470	KLF6	-1.07491	0.474701	1.10995e-06
ENSOCUG00000026770	FJX1	-1.371	0.386624	1.11185e-06
ENSOCUG00000005658	PDZRN4	-1.80432	0.286316	1.1142e-06
ENSOCUG00000009092	PSMA8	2.30654	4.94695	1.14405e-06
ENSOCUG00000010264	DGKI	2.68528	6.43205	1.15165e-06
ENSOCUG00000025809		-1.81427	0.284348	1.15278e-06
ENSOCUG00000010962	GREB1L	-1.21556	0.430605	1.15461e-06
ENSOCUG00000034824		7.08225	135.51	1.15491e-06
ENSOCUG00000016096	LOC103345701	-7.66096	0.00494109	1.15491e-06
ENSOCUG00000023658	ERICH2	2.59741	6.05198	1.15992e-06
ENSOCUG00000008322	ASB9	1.08318	2.1187	1.1918e-06
ENSOCUG00000027790	NEURL1B	-1.19923	0.435507	1.21686e-06
ENSOCUG00000008985	EBF1	-1.36111	0.389284	1.24095e-06
ENSOCUG00000011296	GLB1L3	-7.28295	0.00642117	1.24095e-06
ENSOCUG00000017882	ANO3	2.54437	5.83351	1.30604e-06
ENSOCUG00000011665	ARHGAP26	1.05055	2.07132	1.30604e-06
ENSOCUG00000012702	SIGLEC1	-1.53019	0.346231	1.30846e-06
ENSOCUG00000007844	SOS1	-1.03595	0.487695	1.32453e-06
ENSOCUG00000010373	SIAH2	-1.16661	0.445466	1.33206e-06
ENSOCUG00000010891		1.06917	2.09822	1.39839e-06
ENSOCUG00000028060	VGLL1	-5.07493	0.0296684	1.40271e-06
ENSOCUG00000002539	SLC22A1	1.24841	2.3758	1.42718e-06
ENSOCUG00000005605	LDLRAD4	-1.00723	0.497501	1.45811e-06
ENSOCUG00000011526	AADAT	1.16844	2.24769	1.46682e-06
ENSOCUG00000023498	TBX2	-1.90844	0.26638	1.49405e-06
ENSOCUG00000015852	KCNQ4	-1.68931	0.310075	1.4942e-06
ENSOCUG00000013106	VIPR1	1.80589	3.49644	1.52797e-06
ENSOCUG00000023769	PTGES	1.32454	2.50454	1.52883e-06
ENSOCUG00000020895	VGLL3	-4.61161	0.040904	1.57422e-06
ENSOCUG00000024741	TMPRSS2	1.17436	2.25693	1.57828e-06
ENSOCUG00000037360		2.03944	4.11086	1.57919e-06
ENSOCUG00000014988	COL3A1	-1.6732	0.313557	1.59249e-06
ENSOCUG00000012959	ADAMTS20	-1.90357	0.267282	1.61559e-06
ENSOCUG00000004647	CSTF2T	2.54913	5.85281	1.62033e-06
ENSOCUG00000023490	PRICKLE1	-1.38904	0.381819	1.62156e-06
ENSOCUG00000006203	DUSP27	-2.36385	0.194272	1.62402e-06
ENSOCUG00000009754	LRRC6	1.63382	3.10334	1.6468e-06
ENSOCUG00000021202	ADGB	2.81	7.01282	1.6629e-06
ENSOCUG00000010996	TFAP2C	1.75788	3.38202	1.68964e-06
ENSOCUG00000030923		2.30515	4.9422	1.69025e-06
ENSOCUG00000027560	CACFD1	1.45774	2.74678	1.75468e-06
ENSOCUG00000030607		3.77192	13.6603	1.84046e-06
ENSOCUG00000017084	HCN1	-2.83133	0.140503	1.92901e-06
ENSOCUG00000029735		1.34597	2.54201	1.92937e-06
ENSOCUG00000027198	SLC38A4	1.09889	2.1419	2.03707e-06
ENSOCUG00000015548	PEAK1	-1.37479	0.385609	2.11934e-06
ENSOCUG00000004282		-1.42866	0.371475	2.1412e-06
ENSOCUG00000022701	LOC103351872	1.88421	3.6915	2.17174e-06
ENSOCUG00000029804		-1.1544	0.449252	2.19933e-06
ENSOCUG00000010919	PABPC5	-1.14491	0.452219	2.22339e-06
ENSOCUG00000003996	KIDINS220	-1.04137	0.485867	2.22401e-06
ENSOCUG00000000724	SLC7A7	-1.61439	0.326603	2.2309e-06
ENSOCUG00000027059		1.16429	2.24123	2.25593e-06
ENSOCUG00000029630	ALKAL2	-4.05144	0.0603108	2.30892e-06
ENSOCUG00000010770	PAK5	2.72759	6.62349	2.31625e-06
ENSOCUG00000001160	HOXC9	1.02426	2.03391	2.38343e-06
ENSOCUG00000031560	TAFA1	5.75201	53.8926	2.49558e-06
ENSOCUG00000032070		-3.50631	0.0880027	2.50096e-06
ENSOCUG00000015159	EVX1	2.56451	5.91553	2.51783e-06
ENSOCUG00000002020	LGI3	-1.89239	0.269361	2.6355e-06
ENSOCUG00000009417	PDE5A	1.11213	2.16164	2.65764e-06
ENSOCUG00000026480	AOX2	1.09876	2.14171	2.65764e-06
ENSOCUG00000037101		1.6217	3.07738	2.81131e-06
ENSOCUG00000032962		-1.26649	0.415669	2.87127e-06
ENSOCUG00000003979	MANSC1	-1.15241	0.449873	2.89523e-06
ENSOCUG00000011697	VCAM1	-1.97157	0.254975	2.98137e-06
ENSOCUG00000017691	UNC5D	1.55283	2.93391	2.99879e-06
ENSOCUG00000025757	TMEM200B	-1.07802	0.47368	3.00597e-06
ENSOCUG00000012713	FGF13	1.29681	2.45684	3.03376e-06
ENSOCUG00000002884	JAG1	-1.00661	0.497713	3.05434e-06
ENSOCUG00000036699	LOC100358731	1.78816	3.45373	3.07978e-06
ENSOCUG00000003639	CREB5	-1.4979	0.354069	3.11144e-06
ENSOCUG00000001172	CCDC138	1.23717	2.35736	3.12036e-06
ENSOCUG00000008357	TMEM200A	-1.19482	0.43684	3.12036e-06
ENSOCUG00000003061	SV2B	2.56458	5.91583	3.12315e-06
ENSOCUG00000015665	NTN4	-2.12056	0.229958	3.1638e-06
ENSOCUG00000014540	RHBDF2	-1.02139	0.492642	3.1638e-06
ENSOCUG00000003052	SLC16A7	1.38194	2.60619	3.18229e-06
ENSOCUG00000001839	PPP2R3A	-1.10291	0.465576	3.21517e-06
ENSOCUG00000023110		-1.4866	0.356852	3.25322e-06
ENSOCUG00000003829	EZR	-1.09324	0.468706	3.29369e-06
ENSOCUG00000012418	FGF5	-2.14808	0.225613	3.29369e-06
ENSOCUG00000026281	PAK6	1.37831	2.59964	3.29824e-06
ENSOCUG00000017018	RNF152	1.47562	2.78102	3.34854e-06
ENSOCUG00000008288	ECM2	-1.47148	0.360613	3.35493e-06
ENSOCUG00000009356	PKDREJ	-1.0202	0.493048	3.40346e-06
ENSOCUG00000026290	SERPINE3	-3.43152	0.092685	3.41619e-06
ENSOCUG00000039374		3.69735	12.9722	3.45467e-06
ENSOCUG00000010159	FADS6	-1.28041	0.411679	3.55672e-06
ENSOCUG00000037930	LOC103348206	-3.02329	0.122998	3.70634e-06
ENSOCUG00000011452	LOC103352261	-1.73312	0.300801	3.72765e-06
ENSOCUG00000016764	MYT1L	-2.40078	0.189362	3.7675e-06
ENSOCUG00000003049	COL17A1	-1.70106	0.30756	3.77496e-06
ENSOCUG00000035541		-1.80842	0.285503	3.78799e-06
ENSOCUG00000011500	TNC	-2.66771	0.157376	3.79778e-06
ENSOCUG00000034152		3.29537	9.8176	3.82987e-06
ENSOCUG00000026087	LOC100339032	-4.77247	0.0365884	3.85992e-06
ENSOCUG00000012591	UCP2	-1.26975	0.414732	4.02277e-06
ENSOCUG00000029978		-1.00521	0.498199	4.06599e-06
ENSOCUG00000008202	FAS	-1.56064	0.339	4.122e-06
ENSOCUG00000012761	LY75	1.97802	3.93952	4.18999e-06
ENSOCUG00000015043	LOC100340535	1.84284	3.58715	4.2e-06
ENSOCUG00000002457	CNPY1	2.4341	5.40426	4.22868e-06
ENSOCUG00000029434	C18orf63	2.80082	6.96835	4.2606e-06
ENSOCUG00000012806	RGS14	-1.32534	0.399056	4.27494e-06
ENSOCUG00000027880	ZEB2	-1.49097	0.355773	4.30368e-06
ENSOCUG00000017694	KRT23	2.1753	4.51681	4.30928e-06
ENSOCUG00000024465	COL8A1	1.86995	3.65521	4.32179e-06
ENSOCUG00000002381	LOC100356734	-1.80874	0.285441	4.43823e-06
ENSOCUG00000004123	PLA2G3	-1.94003	0.260611	4.46049e-06
ENSOCUG00000007086	KIT	1.26771	2.40778	4.53113e-06
ENSOCUG00000015168	PLB1	1.33218	2.51783	4.54416e-06
ENSOCUG00000015953	STK17A	-1.12638	0.458064	4.59301e-06
ENSOCUG00000033934		6.55278	93.8823	4.62916e-06
ENSOCUG00000034453		3.2758	9.68529	4.63892e-06
ENSOCUG00000010677	INSRR	2.32704	5.01775	4.71527e-06
ENSOCUG00000016565	NOTCH2	-1.27273	0.413877	4.71527e-06
ENSOCUG00000013451	RLN3	-3.93078	0.0655718	4.78787e-06
ENSOCUG00000003531	B4GALNT2	2.58036	5.98088	4.94619e-06
ENSOCUG00000016779	SOX3	1.97819	3.93997	5.01989e-06
ENSOCUG00000016527	GABBR2	-1.32329	0.399623	5.0897e-06
ENSOCUG00000003785	HIPK1	-1.23617	0.424497	5.19902e-06
ENSOCUG00000008685	NODAL	1.61806	3.06962	5.51818e-06
ENSOCUG00000017412	RHCG	-1.66979	0.314298	5.53906e-06
ENSOCUG00000017339	KIAA1671	-1.46441	0.362383	5.54329e-06
ENSOCUG00000009279	ABCA1	-1.10461	0.465029	5.58752e-06
ENSOCUG00000016736	MAP7D2	1.10806	2.15555	5.61778e-06
ENSOCUG00000008274	PROX1	-1.89677	0.268543	5.67222e-06
ENSOCUG00000017140	PHF24	1.14086	2.20512	5.68198e-06
ENSOCUG00000012661	PTPRU	1.97447	3.92985	5.6843e-06
ENSOCUG00000027854		1.53109	2.89004	5.69352e-06
ENSOCUG00000002042	NAALADL2	-1.55711	0.339831	5.75804e-06
ENSOCUG00000029019	FZD8	-1.78353	0.290472	5.80028e-06
ENSOCUG00000004511	HSPB8	-1.37019	0.38684	5.83116e-06
ENSOCUG00000003263	SLCO5A1	1.65589	3.15117	5.87077e-06
ENSOCUG00000001105	PLA2G1B	-2.10473	0.232495	6.00383e-06
ENSOCUG00000034906		2.97708	7.87392	6.0311e-06
ENSOCUG00000013420	ADGRA2	-1.25941	0.417714	6.15703e-06
ENSOCUG00000017021	SLC30A3	1.78842	3.45435	6.23816e-06
ENSOCUG00000029312	SLC32A1	3.08301	8.4738	6.27861e-06
ENSOCUG00000008015	LOC100343860	3.06418	8.36395	6.32409e-06
ENSOCUG00000000120	ADCYAP1R1	1.34242	2.53576	6.35474e-06
ENSOCUG00000016758	LOC100346950	6.32464	80.1504	6.39525e-06
ENSOCUG00000008137	MLLT3	1.12635	2.18306	6.39606e-06
ENSOCUG00000005910	CCDC36	-2.79642	0.143944	6.55736e-06
ENSOCUG00000005274	PRLR	-1.3369	0.39587	6.56583e-06
ENSOCUG00000016738	GRIN3A	-1.47993	0.358505	6.67647e-06
ENSOCUG00000032667		-2.60872	0.163945	6.74205e-06
ENSOCUG00000005358	ACOT12	3.73107	13.2789	6.80137e-06
ENSOCUG00000009052	EYA1	1.29707	2.45729	6.82234e-06
ENSOCUG00000003876	FHDC1	-2.23502	0.212419	6.85532e-06
ENSOCUG00000014258		1.81759	3.52493	6.91791e-06
ENSOCUG00000039186		2.42217	5.35977	6.93762e-06
ENSOCUG00000029184		1.58262	2.99513	7.15961e-06
ENSOCUG00000000320	FAM110C	1.32199	2.50011	7.3861e-06
ENSOCUG00000035058	RIDA	1.2457	2.37134	7.40785e-06
ENSOCUG00000000157	ST3GAL1	-1.10124	0.466116	7.49161e-06
ENSOCUG00000001144	SLC6A6	1.08068	2.11503	7.57741e-06
ENSOCUG00000027714	LOC100342535	2.27615	4.84382	7.59732e-06
ENSOCUG00000037720	FKBP1B	1.55535	2.93906	7.64643e-06
ENSOCUG00000008253	TFPI	-1.36477	0.388298	7.75728e-06
ENSOCUG00000037686	LOC103346855	-4.22191	0.0535893	7.78536e-06
ENSOCUG00000033175		2.34723	5.08846	7.85203e-06
ENSOCUG00000039027		2.58305	5.99205	7.86987e-06
ENSOCUG00000021958	RNF212B	3.20173	9.20063	7.95538e-06
ENSOCUG00000016751		1.85679	3.62201	8.09385e-06
ENSOCUG00000033140		-1.30851	0.403739	8.10117e-06
ENSOCUG00000012544	KIRREL3	1.25598	2.38829	8.46605e-06
ENSOCUG00000008291	BIN2	1.0108	2.01503	8.50314e-06
ENSOCUG00000029361		1.5072	2.84257	8.56637e-06
ENSOCUG00000013783	NANOG	1.68035	3.20506	8.79775e-06
ENSOCUG00000016983	TMPRSS4	1.80669	3.4984	8.89259e-06
ENSOCUG00000029733		1.029	2.0406	8.91687e-06
ENSOCUG00000021480	FOXS1	-2.08752	0.235284	8.95502e-06
ENSOCUG00000009532	AFF3	-1.2791	0.412053	9.05814e-06
ENSOCUG00000017108	ASXL2	-1.07203	0.475648	9.20245e-06
ENSOCUG00000000812	CCDC39	1.29118	2.44729	9.30219e-06
ENSOCUG00000016629	SSC4D	-1.21572	0.430558	9.34506e-06
ENSOCUG00000008290	HSP90AB1	-1.62458	0.324303	9.46667e-06
ENSOCUG00000015434	MAP3K5	-1.70228	0.307301	9.65439e-06
ENSOCUG00000033121		-6.07021	0.0148828	1.014e-05
ENSOCUG00000009208	ACVR1C	1.6271	3.08891	1.03284e-05
ENSOCUG00000038430	NSG2	1.69989	3.24875	1.05153e-05
ENSOCUG00000009466	HEPHL1	2.77571	6.84811	1.07151e-05
ENSOCUG00000015922	RNASEL	-1.26375	0.416459	1.07839e-05
ENSOCUG00000031681		-1.74907	0.297493	1.08969e-05
ENSOCUG00000026903	LOC103349295	4.1657	17.9473	1.09795e-05
ENSOCUG00000032767		1.15754	2.23077	1.10461e-05
ENSOCUG00000000861	CD82	-1.43439	0.370004	1.10882e-05
ENSOCUG00000008858	CORIN	-2.47412	0.179977	1.15339e-05
ENSOCUG00000000527	DPYSL4	1.45752	2.74637	1.17563e-05
ENSOCUG00000023520	FLRT1	1.94914	3.86144	1.19983e-05
ENSOCUG00000001980		2.52274	5.74672	1.23962e-05
ENSOCUG00000010024	PLPP3	-1.01064	0.496326	1.24319e-05
ENSOCUG00000007350	TIMM9	1.25299	2.38335	1.26321e-05
ENSOCUG00000017019	CDH11	-1.56474	0.338038	1.27528e-05
ENSOCUG00000029958		-1.21083	0.43202	1.35049e-05
ENSOCUG00000004494	THSD7B	1.5377	2.90331	1.37589e-05
ENSOCUG00000038463	LMLN2	1.41614	2.66871	1.37681e-05
ENSOCUG00000002716	BTBD11	1.28325	2.43386	1.41589e-05
ENSOCUG00000013864	PTHLH	3.68654	12.8753	1.41671e-05
ENSOCUG00000016173	WNT2	-3.45562	0.0911495	1.42412e-05
ENSOCUG00000001891	GPAT2	1.93188	3.81552	1.42819e-05
ENSOCUG00000002496		-1.14802	0.451243	1.45146e-05
ENSOCUG00000027588	NPR1	1.10989	2.1583	1.46327e-05
ENSOCUG00000025701	CRHR1	1.84426	3.59068	1.4643e-05
ENSOCUG00000038033		2.90178	7.47346	1.49284e-05
ENSOCUG00000000968	DES	-1.10032	0.466413	1.50827e-05
ENSOCUG00000005061	LOC100338194	-2.67127	0.156989	1.51147e-05
ENSOCUG00000014732	RIMKLA	1.24771	2.37463	1.51415e-05
ENSOCUG00000035165		-2.54735	0.171069	1.56245e-05
ENSOCUG00000011700	VWA2	1.19772	2.29376	1.56904e-05
ENSOCUG00000008086	LRRC15	2.7141	6.56184	1.69484e-05
ENSOCUG00000007796	NDST4	-2.61835	0.162854	1.69551e-05
ENSOCUG00000017866	NMB	1.47373	2.77738	1.69626e-05
ENSOCUG00000025149	LOC100338723	1.13175	2.19125	1.69746e-05
ENSOCUG00000011018	STARD9	-1.51328	0.350315	1.72047e-05
ENSOCUG00000003060	GCH1	1.86341	3.63867	1.72082e-05
ENSOCUG00000022014	NOTCH3	-1.47077	0.36079	1.73409e-05
ENSOCUG00000025513	IGFBP5	-1.57245	0.336238	1.74596e-05
ENSOCUG00000017064	UPK3A	2.66284	6.33279	1.75145e-05
ENSOCUG00000036240		-1.16179	0.446957	1.758e-05
ENSOCUG00000007349	LOC100356534	1.63583	3.10767	1.77202e-05
ENSOCUG00000003733	SPOCK3	1.49742	2.82338	1.7894e-05
ENSOCUG00000027406		1.24936	2.37735	1.81583e-05
ENSOCUG00000009736	NTRK2	2.08452	4.24135	1.86096e-05
ENSOCUG00000033803	CKS2	1.00654	2.00909	1.89991e-05
ENSOCUG00000001263	TECTA	1.883	3.68841	1.90296e-05
ENSOCUG00000017595	EPHA5	1.23189	2.34874	1.90296e-05
ENSOCUG00000023246	LOC100359206	6.03895	65.7513	1.92393e-05
ENSOCUG00000028187	SLC41A1	-1.06426	0.478216	1.94286e-05
ENSOCUG00000027106	HAS2	-1.21196	0.431681	1.94291e-05
ENSOCUG00000011218	CFAP92	1.38009	2.60285	2.01999e-05
ENSOCUG00000014369	GCNT2	1.17632	2.25999	2.0374e-05
ENSOCUG00000015956	LRMP	-1.52464	0.347566	2.03976e-05
ENSOCUG00000037044	PTMA	-2.38648	0.191249	2.04562e-05
ENSOCUG00000025675	EDN3	1.55929	2.9471	2.05468e-05
ENSOCUG00000002587	TSHZ2	-1.49069	0.355842	2.05661e-05
ENSOCUG00000010933	POU3F3	1.92243	3.79062	2.06785e-05
ENSOCUG00000004661	C8H12orf40	1.71992	3.29418	2.06785e-05
ENSOCUG00000024150	SYN1	-2.04316	0.242631	2.12756e-05
ENSOCUG00000017499	PLPPR5	-1.41215	0.375752	2.16051e-05
ENSOCUG00000007302	CILP	-1.30532	0.404631	2.17908e-05
ENSOCUG00000009563	TMEM263	-1.35111	0.39199	2.20699e-05
ENSOCUG00000025481	APOLD1	1.02096	2.02926	2.24043e-05
ENSOCUG00000014011	GRIP1	1.01609	2.02244	2.29793e-05
ENSOCUG00000015737	SMPD1	-1.62468	0.324281	2.33174e-05
ENSOCUG00000000299	LIN28A	1.83596	3.57009	2.33174e-05
ENSOCUG00000014417		-1.08368	0.471825	2.33381e-05
ENSOCUG00000014857	COL5A3	-4.73002	0.0376809	2.33834e-05
ENSOCUG00000025417		1.12358	2.17888	2.50898e-05
ENSOCUG00000002215	BEX5	-1.1488	0.451001	2.51481e-05
ENSOCUG00000003735	HCAR1	1.33949	2.53062	2.56673e-05
ENSOCUG00000033177		-7.22198	0.00669833	2.58818e-05
ENSOCUG00000024303	ATP6V1B1	3.75068	13.4607	2.58914e-05
ENSOCUG00000002771	TOB1	-1.41978	0.37377	2.58914e-05
ENSOCUG00000012541	SOSTDC1	-2.60785	0.164043	2.61547e-05
ENSOCUG00000013013	L3MBTL4	-1.38097	0.383962	2.6545e-05
ENSOCUG00000015778	SLC25A47	1.25182	2.38142	2.65551e-05
ENSOCUG00000017527	LRRIQ1	1.02934	2.04109	2.6597e-05
ENSOCUG00000033142		-1.58111	0.334225	2.69579e-05
ENSOCUG00000028074	DHRS2	-2.41773	0.18715	2.71885e-05
ENSOCUG00000034716		-1.86305	0.274895	2.75301e-05
ENSOCUG00000001814	GUCY1B1	-1.00767	0.497349	2.77639e-05
ENSOCUG00000034343		3.49835	11.3008	2.84768e-05
ENSOCUG00000002614	IL1RAPL2	-2.82298	0.141319	2.85636e-05
ENSOCUG00000014585	ZDHHC2	-2.6573	0.158516	2.87023e-05
ENSOCUG00000002875	STOX1	1.46774	2.76589	2.87342e-05
ENSOCUG00000000895	PTGER4	2.80457	6.98651	2.87368e-05
ENSOCUG00000021773	OTX1	6.29067	78.2856	2.8904e-05
ENSOCUG00000002466	STAT4	1.39602	2.63175	2.93702e-05
ENSOCUG00000014092	BEST1	-1.95546	0.257839	2.96234e-05
ENSOCUG00000012413	CATIP	1.64477	3.12697	3.01496e-05
ENSOCUG00000012530	NPNT	1.17091	2.25153	3.01654e-05
ENSOCUG00000011599	CACNA1C	-1.41026	0.376245	3.14656e-05
ENSOCUG00000025866	AK8	1.27658	2.42265	3.14781e-05
ENSOCUG00000005309		1.86598	3.64515	3.20661e-05
ENSOCUG00000009843	SPOCK1	-1.19852	0.435723	3.24691e-05
ENSOCUG00000001257	TMEM144	1.48111	2.79163	3.25869e-05
ENSOCUG00000028026	STAB1	-1.40673	0.377165	3.27033e-05
ENSOCUG00000002944	SLC34A2	1.29173	2.44821	3.28625e-05
ENSOCUG00000027081	VRTN	1.99614	3.98931	3.30051e-05
ENSOCUG00000037351	KLK9	-3.44216	0.0920042	3.34508e-05
ENSOCUG00000014953	SYNE3	-1.42828	0.371573	3.36276e-05
ENSOCUG00000004324	ZFP42	1.21446	2.32054	3.48124e-05
ENSOCUG00000017564	ENTPD8	2.16088	4.47188	3.50938e-05
ENSOCUG00000016518	KIAA1217	-1.61538	0.326379	3.58378e-05
ENSOCUG00000011797	SALL4	1.36402	2.57401	3.74414e-05
ENSOCUG00000005947	SCEL	-1.30334	0.405186	3.74414e-05
ENSOCUG00000008031	ETV4	1.41424	2.6652	3.77827e-05
ENSOCUG00000029987		2.2926	4.89938	3.81505e-05
ENSOCUG00000008208	EMX1	3.92646	15.2049	3.86261e-05
ENSOCUG00000019225	MIR31	1.65234	3.14344	3.87858e-05
ENSOCUG00000032791	MIR31	2.34659	5.0862	3.87858e-05
ENSOCUG00000016867	SYT16	3.18425	9.08982	3.95888e-05
ENSOCUG00000033658	PAQR5	2.29913	4.92162	3.99059e-05
ENSOCUG00000008892	RAPSN	1.01354	2.01886	4.00088e-05
ENSOCUG00000004686	TENM4	-1.33716	0.395798	4.07021e-05
ENSOCUG00000005959	ALOX12B	2.21218	4.63376	4.09454e-05
ENSOCUG00000021126	MT1X	1.14787	2.21587	4.15144e-05
ENSOCUG00000037170		1.23767	2.35817	4.21363e-05
ENSOCUG00000014520	CAV1	-1.17381	0.44325	4.38341e-05
ENSOCUG00000001671	LARGE2	1.09481	2.13586	4.41022e-05
ENSOCUG00000007929	STAT6	-1.12722	0.457797	4.45401e-05
ENSOCUG00000005620	NRXN1	-1.45978	0.36355	4.48636e-05
ENSOCUG00000014480	C1R	-1.03201	0.489027	4.5154e-05
ENSOCUG00000002407	MFAP5	-4.2195	0.0536789	4.57799e-05
ENSOCUG00000010852	HSPB7	-1.75934	0.295384	4.61369e-05
ENSOCUG00000005958	ATRNL1	-1.07315	0.47528	4.61518e-05
ENSOCUG00000029452	LOC100352291	3.19698	9.1704	4.67981e-05
ENSOCUG00000011143	FOSL1	-1.48318	0.3577	4.75549e-05
ENSOCUG00000003594	OLFML2B	-2.09053	0.234794	4.85116e-05
ENSOCUG00000003806	KY	1.74737	3.35745	4.87609e-05
ENSOCUG00000005892	ARHGAP33	-1.24578	0.42168	4.93816e-05
ENSOCUG00000005512	RXRG	1.27595	2.42158	5.10279e-05
ENSOCUG00000014548	EVPL	1.24284	2.36664	5.12223e-05
ENSOCUG00000004624	SYT10	4.27486	19.358	5.13335e-05
ENSOCUG00000031603		1.04217	2.05932	5.2373e-05
ENSOCUG00000011787	ANXA13	-3.87157	0.0683191	5.25518e-05
ENSOCUG00000021069	LOC100342660	1.80061	3.48367	5.25518e-05
ENSOCUG00000011179	TNMD	-2.95913	0.128592	5.32753e-05
ENSOCUG00000027672	PPFIA4	1.10303	2.14806	5.333e-05
DTOCUGMSX1	MSX1	1.70528	3.26093	5.39538e-05
ENSOCUG00000023701	OACYL	3.01953	8.10905	5.4477e-05
ENSOCUG00000001109	CAMTA2	-1.00953	0.496708	5.45761e-05
ENSOCUG00000015423	ZDHHC23	1.06209	2.08795	5.50987e-05
ENSOCUG00000035463		-7.30161	0.00633865	5.59519e-05
ENSOCUG00000002973	PTCH1	-1.37718	0.384971	5.73693e-05
ENSOCUG00000005778	CPED1	-2.38256	0.191769	5.90756e-05
ENSOCUG00000005368	AADAC	1.87443	3.66658	6.20892e-05
ENSOCUG00000012739	PIK3CG	-1.18262	0.44055	6.20892e-05
ENSOCUG00000010357	MBOAT1	-1.67892	0.312317	6.30192e-05
ENSOCUG00000026462	LUZP2	2.32062	4.99546	6.4029e-05
ENSOCUG00000011876	SLN	-3.0037	0.12468	6.46089e-05
ENSOCUG00000017834	NBEA	-1.16074	0.447282	6.50858e-05
ENSOCUG00000026094		3.25538	9.54919	6.57541e-05
ENSOCUG00000007852	UGP2	-1.0956	0.467942	6.58892e-05
ENSOCUG00000015622	METTL7A	-2.1418	0.226598	6.59681e-05
ENSOCUG00000004066	LZTS3	-1.23493	0.424862	6.62272e-05
ENSOCUG00000026619	MYO7B	-2.8038	0.14321	6.95972e-05
ENSOCUG00000021095		1.78238	3.43994	7.0741e-05
ENSOCUG00000032613	SLC2A13	1.63206	3.09956	7.0742e-05
ENSOCUG00000002893	C7orf57	1.15303	2.22381	7.30999e-05
ENSOCUG00000031930		-1.14016	0.45371	7.31244e-05
ENSOCUG00000027164	PPP1R36	-2.51064	0.175478	7.32662e-05
ENSOCUG00000013891	LYZ	1.71082	3.27347	7.32895e-05
ENSOCUG00000011396	XIRP1	-2.93753	0.130532	7.367e-05
ENSOCUG00000017782	ACE2	-1.92529	0.263287	7.53008e-05
ENSOCUG00000029364	IP6K3	-3.23602	0.106136	7.54636e-05
ENSOCUG00000022715	ZFHX2	-1.35715	0.390354	7.69664e-05
ENSOCUG00000008418	B4GALNT3	1.17312	2.25498	7.7822e-05
ENSOCUG00000010820	MAML2	-1.1906	0.43812	7.95271e-05
ENSOCUG00000006859	FNIP2	-1.00271	0.499061	8.01692e-05
ENSOCUG00000001387	TDRKH	1.15718	2.23021	8.07451e-05
ENSOCUG00000013084	KRT35	-1.78703	0.289768	8.12148e-05
ENSOCUG00000002687	TMEM225	4.59699	24.2009	8.15365e-05
ENSOCUG00000011959	MAP6D1	-1.24826	0.420957	8.27792e-05
ENSOCUG00000005766	ITPR3	-1.34739	0.393003	8.28158e-05
ENSOCUG00000033172		1.50456	2.83738	8.32651e-05
ENSOCUG00000015234	COL14A1	-2.32092	0.200139	8.43764e-05
ENSOCUG00000006573	SCAMP5	-1.0557	0.481065	8.44456e-05
ENSOCUG00000009939	MYPN	-5.333	0.0248089	8.44835e-05
ENSOCUG00000035379		4.28899	19.5485	8.47625e-05
ENSOCUG00000023263	NDUFA4L2	-1.27709	0.412628	8.56808e-05
ENSOCUG00000026191	LOC100342351	1.01629	2.02272	8.78535e-05
ENSOCUG00000014374	C12orf56	1.9922	3.97844	8.79181e-05
ENSOCUG00000010102	NAA11	1.77881	3.43144	9.07788e-05
ENSOCUG00000016198	LOC100340546	-1.77181	0.292842	9.07801e-05
ENSOCUG00000029203	ZFP37	1.00548	2.0076	9.3061e-05
ENSOCUG00000032619	TRIM60	1.84384	3.58965	9.39548e-05
ENSOCUG00000027526		-5.55874	0.0212155	9.41161e-05
ENSOCUG00000004252	FAM131C	1.39612	2.63193	9.66151e-05
ENSOCUG00000005990	GASK1A	1.6693	3.18061	9.72327e-05
ENSOCUG00000024756	NUDT11	-1.00933	0.496777	9.89907e-05
ENSOCUG00000006774	SPEF2	-1.37148	0.386495	0.000100757
ENSOCUG00000013292	SNCG	-2.07658	0.237076	0.000101331
ENSOCUG00000005180		-4.01182	0.06199	0.000102176
ENSOCUG00000025164	LOC100358248	-1.41068	0.376134	0.000102261
ENSOCUG00000007763	CACNA2D1	-1.4894	0.356161	0.000102392
ENSOCUG00000009172	IRX2	3.03584	8.2012	0.000102762
ENSOCUG00000005346	TDRD15	1.62005	3.07386	0.000103983
ENSOCUG00000015810	TULP1	-1.07992	0.473054	0.000106319
ENSOCUG00000027437	LOC103348520	1.62268	3.07947	0.000107114
ENSOCUG00000013961	DNAH11	1.09266	2.13267	0.000108941
ENSOCUG00000029294		2.02942	4.0824	0.000109768
ENSOCUG00000014968	DDC	2.46509	5.5216	0.000110378
ENSOCUG00000021281	RPS7	2.03503	4.09832	0.000110378
ENSOCUG00000031027		-2.43666	0.184711	0.000110516
ENSOCUG00000008619	TMCC3	1.11875	2.17158	0.000112851
ENSOCUG00000039306		-1.77327	0.292545	0.000113326
ENSOCUG00000015962	ASZ1	2.01409	4.03925	0.000113589
ENSOCUG00000006084	CMBL	1.08442	2.12052	0.000113704
ENSOCUG00000034606		5.83578	57.1143	0.000115036
ENSOCUG00000037526		3.95034	15.4586	0.000119103
ENSOCUG00000025061	CCL24	-6.23268	0.0132977	0.000121376
ENSOCUG00000013515		-1.0891	0.470054	0.000122059
ENSOCUG00000030876		4.75342	26.9725	0.000124376
ENSOCUG00000021033		-2.65572	0.158689	0.000126772
ENSOCUG00000017480	GAD2	4.70535	26.0887	0.000129149
ENSOCUG00000029053		-6.97528	0.0079475	0.000131758
ENSOCUG00000015981	DGKH	-1.20546	0.43363	0.000132158
ENSOCUG00000003120	OPRK1	-1.61261	0.327006	0.000134052
ENSOCUG00000001100	SOX15	1.28738	2.44085	0.000137124
ENSOCUG00000026122		4.04039	16.4543	0.000138313
ENSOCUG00000004152	GDF10	-1.28802	0.409514	0.000139013
ENSOCUG00000001616	PCSK5	-1.17459	0.443008	0.000140441
ENSOCUG00000039673	LOC103347035	1.22922	2.3444	0.000141348
ENSOCUG00000008781	ADAM12	-1.60746	0.328177	0.000141722
ENSOCUG00000008674	MCF2L2	1.13258	2.1925	0.000142219
ENSOCUG00000031234		3.7892	13.8249	0.00014294
ENSOCUG00000001875	TSPAN12	1.05164	2.07289	0.000143928
ENSOCUG00000035831		-1.47558	0.359589	0.000145373
ENSOCUG00000004185	FNDC3B	-1.24415	0.422156	0.000145763
ENSOCUG00000002185	CHRNA4	1.7412	3.34313	0.000148786
ENSOCUG00000001021		6.11302	69.2153	0.000149537
ENSOCUG00000013644	RPE65	-2.02458	0.245777	0.000150688
ENSOCUG00000037919	C20orf204	-1.0954	0.468006	0.000152547
ENSOCUG00000000438	CD3D	-4.75737	0.0369734	0.000153063
ENSOCUG00000000718	SLC1A2	3.55422	11.747	0.000153699
ENSOCUG00000037088		-1.38723	0.382298	0.000154899
ENSOCUG00000013956	CD1E	2.34769	5.09008	0.00015561
ENSOCUG00000032017		4.89547	29.7634	0.00015606
ENSOCUG00000007604	AMER2	-2.29708	0.203474	0.000156789
ENSOCUG00000022990	NXNL2	1.11833	2.17096	0.000156789
ENSOCUG00000029328	OASL	2.19558	4.58075	0.00015969
ENSOCUG00000031735		-1.14413	0.452462	0.000160144
ENSOCUG00000025992		4.25944	19.1522	0.000160291
ENSOCUG00000014957	FRMD3	1.03638	2.05107	0.000162525
ENSOCUG00000025320		1.06932	2.09844	0.000163246
ENSOCUG00000014678	KLHL34	1.39924	2.63764	0.000163999
ENSOCUG00000006355	DDX60	1.04772	2.06727	0.000164158
ENSOCUG00000031505		2.12533	4.36302	0.000164789
ENSOCUG00000002283	LRATD1	-1.0592	0.4799	0.000167626
ENSOCUG00000035257		-1.10516	0.464852	0.000168993
ENSOCUG00000014904	EPAS1	-1.39916	0.37915	0.000169899
ENSOCUG00000027882		1.99846	3.99574	0.000170166
ENSOCUG00000001497	FABP7	1.08552	2.12213	0.00017038
ENSOCUG00000024057	SLC25A4	-1.16389	0.446309	0.00017038
ENSOCUG00000025084		1.1068	2.15368	0.000170381
ENSOCUG00000002911	C16orf78	6.38961	83.8423	0.000171133
ENSOCUG00000016390	CCN4	-2.4138	0.187661	0.000176144
ENSOCUG00000026734	FAM166B	1.88366	3.69009	0.000177619
ENSOCUG00000006995	RAG2	2.90134	7.47121	0.000177705
ENSOCUG00000009115		-1.32941	0.397931	0.000178038
ENSOCUG00000016077	C13H1orf87	3.06481	8.36756	0.000181184
ENSOCUG00000009203	LGR5	2.91394	7.53671	0.00018238
ENSOCUG00000008001	SLC38A5	1.32062	2.49773	0.000183101
ENSOCUG00000014324	TRIML2	1.8557	3.61927	0.000186271
ENSOCUG00000009080	PMFBP1	-2.21843	0.214876	0.000186802
ENSOCUG00000034289		1.16724	2.24581	0.000187813
ENSOCUG00000001190	GFRA2	1.22611	2.33936	0.000189054
ENSOCUG00000029266	CALHM6	3.30207	9.86328	0.000194093
ENSOCUG00000005399	EPO	1.35321	2.5548	0.000196214
ENSOCUG00000007384	RNF17	1.72064	3.29582	0.000197422
ENSOCUG00000003372	ART3	-2.68578	0.155417	0.000197633
ENSOCUG00000001242	ESRP2	1.10768	2.15499	0.000203317
ENSOCUG00000005522	TRIM55	-6.19734	0.0136274	0.000206489
ENSOCUG00000006989	RAG1	1.27595	2.42158	0.000207251
ENSOCUG00000029586	PLA2G2C	-2.98308	0.126474	0.000208207
ENSOCUG00000012087	EFHC1	-1.40192	0.378426	0.000215679
ENSOCUG00000022066	LOC100341088	-1.42157	0.373306	0.000215975
ENSOCUG00000005218	MTUS1	-1.01832	0.493691	0.000217877
ENSOCUG00000035700		-1.16217	0.446841	0.000218029
ENSOCUG00000031833		-1.4037	0.37796	0.000218236
ENSOCUG00000033664		-1.24817	0.420981	0.000220502
ENSOCUG00000004240	DND1	1.86765	3.64938	0.000222963
ENSOCUG00000027622	PRDM14	1.62878	3.09251	0.00022509
ENSOCUG00000003436	SPTBN4	-1.342	0.394473	0.00022753
ENSOCUG00000004745	C14orf39	1.40803	2.65374	0.000228354
ENSOCUG00000004834	F3	-1.7714	0.292924	0.000228742
ENSOCUG00000002658	EYA2	2.11832	4.34187	0.000228924
ENSOCUG00000017726	ITGA11	1.35581	2.55941	0.000228924
ENSOCUG00000037425	CRELD1	-1.09524	0.468058	0.000229375
ENSOCUG00000003850		3.63735	12.4437	0.000230067
ENSOCUG00000013564	TRIM63	-1.46069	0.36332	0.000234143
ENSOCUG00000025031	DNAAF4	1.2406	2.36297	0.000234659
ENSOCUG00000026477	LOC100350027	2.01361	4.03792	0.00024277
ENSOCUG00000011392	ENKUR	1.01252	2.01744	0.000247796
ENSOCUG00000004418	CREB3L1	-1.7026	0.307233	0.000254286
ENSOCUG00000014432	ENPP3	1.61322	3.05934	0.000254286
ENSOCUG00000010723	SLC51B	3.15578	8.91221	0.000259801
ENSOCUG00000030185		5.8839	59.0516	0.000265049
ENSOCUG00000015360	ATXN1	-1.08276	0.472125	0.000268781
ENSOCUG00000029439	HOXA10	1.15885	2.23279	0.000273371
ENSOCUG00000017204	DAB1	1.20935	2.31233	0.000273686
ENSOCUG00000036651		-1.39537	0.380147	0.000277488
ENSOCUG00000030338		-2.71384	0.152424	0.000286582
ENSOCUG00000006175	NUTM1	1.45319	2.73813	0.000292659
ENSOCUG00000000182	LYPD1	1.35072	2.5504	0.000294328
ENSOCUG00000006134	SMAD6	-1.27856	0.412206	0.000296024
ENSOCUG00000013056	ZNF804B	-4.60643	0.0410513	0.000299676
ENSOCUG00000008179	RHBDL3	-1.2021	0.434644	0.000301487
ENSOCUG00000030868		-6.39715	0.011865	0.000305163
ENSOCUG00000006847	CHMP4C	1.91886	3.78123	0.0003087
ENSOCUG00000002896		1.29169	2.44814	0.000310621
ENSOCUG00000013453	HMCN1	-1.23793	0.42398	0.00031178
ENSOCUG00000012248	VSTM2A	2.08618	4.24623	0.00031472
ENSOCUG00000006521	DEPP1	-1.57987	0.334511	0.00031826
ENSOCUG00000026304	ECRG4	-1.11881	0.460472	0.000318599
ENSOCUG00000026982	ADPRHL1	-1.1781	0.441934	0.000318924
ENSOCUG00000012902	LOC100353428	-1.22762	0.427022	0.000321196
ENSOCUG00000028983	U2	1.74549	3.35308	0.000321538
ENSOCUG00000037352		-2.36002	0.194788	0.000328036
ENSOCUG00000011230	MMP16	-1.04014	0.48628	0.000328816
ENSOCUG00000035368		-6.88639	0.00845258	0.000334246
ENSOCUG00000017309	HTR4	1.49381	2.81632	0.000336333
ENSOCUG00000013994	PLA2G4D	-3.54377	0.0857472	0.000338227
ENSOCUG00000021198	POT1	1.17036	2.25067	0.000339931
ENSOCUG00000029475	MYPOP	-1.29106	0.40865	0.000343281
ENSOCUG00000007643	NIPAL1	1.64119	3.11923	0.000344671
ENSOCUG00000036162		1.72206	3.29907	0.00034605
ENSOCUG00000000504	PGC	2.75101	6.73189	0.000348293
ENSOCUG00000015626		2.15448	4.45209	0.000350248
ENSOCUG00000036990		3.90685	14.9995	0.000350651
ENSOCUG00000023359	TINAGL1	-1.24768	0.421124	0.00035194
ENSOCUG00000005730	NOSTRIN	1.21852	2.32708	0.000359761
ENSOCUG00000028053	ASPN	-1.36103	0.389304	0.000360878
ENSOCUG00000004688	PKHD1L1	-1.81826	0.283564	0.000361391
ENSOCUG00000039242		-1.69112	0.309687	0.00036286
ENSOCUG00000025226	BMP5	1.82368	3.53982	0.000369898
ENSOCUG00000029241	ZNF470	1.37698	2.59725	0.000377575
ENSOCUG00000027359	TSPAN11	-1.20168	0.434768	0.000378156
ENSOCUG00000016833	ARMH1	2.65404	6.29429	0.000378431
ENSOCUG00000003247	MRC1	-1.23682	0.424306	0.000379904
ENSOCUG00000033276		1.35027	2.54959	0.000381065
ENSOCUG00000003197	PLAC1	1.51148	2.85102	0.000382299
ENSOCUG00000005716	SLC28A3	1.56053	2.94963	0.000385775
ENSOCUG00000008028	NAP1L5	2.02342	4.06548	0.000387882
ENSOCUG00000017859	RBM46	1.07434	2.10576	0.000389806
ENSOCUG00000033751		2.77228	6.83189	0.000392398
ENSOCUG00000030469		3.00064	8.00354	0.000393248
ENSOCUG00000039489		3.11559	8.66733	0.000393716
ENSOCUG00000014006	APOO	1.11978	2.17314	0.000394024
ENSOCUG00000038237		1.79014	3.45849	0.000395655
ENSOCUG00000023913		-1.07974	0.473115	0.000396408
ENSOCUG00000026167	KPNA2	1.03073	2.04306	0.000405238
ENSOCUG00000038573		1.8709	3.65761	0.000406671
ENSOCUG00000007759	USP2	-1.02647	0.49091	0.000407777
ENSOCUG00000004160	FAM107A	1.04259	2.05992	0.000411406
ENSOCUG00000009547	MYO5B	1.5833	2.99654	0.000413523
ENSOCUG00000012425	LOC100338815	4.07286	16.8287	0.000421412
ENSOCUG00000004490	GUCY1A2	-1.3975	0.379587	0.000423092
ENSOCUG00000030163		1.51323	2.85449	0.000431497
ENSOCUG00000031693	LOC103346468	1.7608	3.38885	0.000435596
ENSOCUG00000016569	CHRM2	-2.13823	0.227159	0.000437045
ENSOCUG00000000828	FLNB	-1.00795	0.497252	0.0004413
ENSOCUG00000011092	FLT4	-1.13311	0.455932	0.000444941
ENSOCUG00000036675		-1.41326	0.375463	0.000447231
ENSOCUG00000033001		5.60334	48.6154	0.000447485
ENSOCUG00000006597	CLGN	1.5915	3.01363	0.000451321
ENSOCUG00000035647		-1.3379	0.395597	0.000452047
ENSOCUG00000030993		1.86977	3.65474	0.000452421
ENSOCUG00000001299	MICAL2	-1.15669	0.448541	0.000459046
ENSOCUG00000009358	ZIC3	1.5756	2.9806	0.000469446
ENSOCUG00000037892	LOC103352048	2.02186	4.06106	0.000469554
ENSOCUG00000014450	ADD2	-2.7827	0.14532	0.000473039
ENSOCUG00000015331	GPRC5D	-2.22917	0.213282	0.000474268
ENSOCUG00000000744	PLTP	-1.03559	0.487815	0.000475356
ENSOCUG00000003660	CCR2	1.31062	2.48047	0.00047914
ENSOCUG00000039234		-2.99555	0.125386	0.000479962
ENSOCUG00000016683	DUSP15	-1.88828	0.27013	0.000481329
ENSOCUG00000034483		-2.49824	0.176992	0.000487691
ENSOCUG00000008435	KCNF1	1.20021	2.29772	0.000495749
ENSOCUG00000036279		-2.03081	0.244718	0.000495749
ENSOCUG00000001603	LRRC14B	1.37903	2.60094	0.000502891
ENSOCUG00000006228	SUSD4	-1.16378	0.446341	0.000505127
ENSOCUG00000006107	GRAMD2A	-1.37552	0.385414	0.000505363
ENSOCUG00000015732	GASK1B	-1.38535	0.382796	0.000514398
ENSOCUG00000022616	LOC103345097	-5.78741	0.0181057	0.000516194
ENSOCUG00000021058	TMEM92	1.28139	2.43073	0.000521191
ENSOCUG00000037775	LOC103345766	1.34973	2.54864	0.000521922
ENSOCUG00000001816	PLCE1	-1.30646	0.404313	0.000522232
ENSOCUG00000036976		6.03094	65.3873	0.000529949
ENSOCUG00000000810	PRICKLE2	-1.31281	0.402536	0.000530994
ENSOCUG00000017875	XKR4	-2.06348	0.239238	0.000530994
ENSOCUG00000017853	SOHLH2	2.31191	4.96541	0.000541114
ENSOCUG00000005248	ZNF804A	-1.8266	0.281928	0.000552322
ENSOCUG00000022911	CBX7	1.05292	2.07473	0.000555162
ENSOCUG00000007194	CSMD2	-1.32158	0.400098	0.000561357
ENSOCUG00000010306	ENTPD3	1.19131	2.2836	0.000566438
ENSOCUG00000012479	CDX1	3.74597	13.4168	0.000569376
ENSOCUG00000004877	ZNF385B	1.20171	2.30011	0.00057236
ENSOCUG00000006208	CIITA	1.21956	2.32876	0.000581859
ENSOCUG00000017169	ASAH2B	-1.43963	0.368662	0.000600369
ENSOCUG00000001075	MORN2	1.15577	2.22803	0.00060101
ENSOCUG00000032142		-1.43408	0.370083	0.000602299
ENSOCUG00000035270		5.87799	58.8102	0.00061887
ENSOCUG00000001222	LOC100357400	1.84696	3.5974	0.00061887
ENSOCUG00000033665		-1.1239	0.458851	0.000623448
ENSOCUG00000014279	KCND3	-1.04759	0.483775	0.000626038
ENSOCUG00000010160	WDR63	1.54969	2.92754	0.000626481
ENSOCUG00000015047	CNTN5	1.18654	2.27607	0.000632715
ENSOCUG00000029251		1.20941	2.31243	0.000634932
ENSOCUG00000035512		5.64501	50.0401	0.00064674
ENSOCUG00000006271	ADGRD2	-3.28337	0.102708	0.000653831
ENSOCUG00000016043	PLA2G12B	5.58749	48.0841	0.00066327
ENSOCUG00000027946	RPL36AL	1.05602	2.07919	0.00066449
ENSOCUG00000030103		-3.42069	0.0933836	0.000664843
ENSOCUG00000024264	IRX1	2.57493	5.95843	0.000668039
ENSOCUG00000002335	LRRC9	1.30164	2.46509	0.000668866
ENSOCUG00000007281	HCN4	1.27709	2.42349	0.000673869
ENSOCUG00000002891	SERPINC1	2.7148	6.56501	0.000675476
ENSOCUG00000033876		1.24422	2.36891	0.000681709
ENSOCUG00000016017	SLC35F3	-1.01058	0.496347	0.000684178
ENSOCUG00000002697	LOC100342847	2.60944	6.10267	0.000686929
ENSOCUG00000008757	MYOF	-1.22643	0.427375	0.000691623
ENSOCUG00000016546	CNTNAP5	1.39304	2.62632	0.000694473
ENSOCUG00000010894	SRSF1	1.54413	2.91629	0.000702297
ENSOCUG00000032959		1.1201	2.17363	0.000704347
ENSOCUG00000007479	PDE3A	-1.17096	0.444125	0.00070951
ENSOCUG00000028055	LOC100358544	1.69846	3.24554	0.00070951
ENSOCUG00000034251		-1.94641	0.259461	0.000712099
ENSOCUG00000003662	PLXNA1	-1.05204	0.482287	0.000713717
ENSOCUG00000017093	TEX15	1.15741	2.23057	0.000713717
ENSOCUG00000033212	HIVEP3	-4.07725	0.0592413	0.000718993
ENSOCUG00000023078	CCDC9B	-1.40878	0.376631	0.000742902
ENSOCUG00000009321	LHX5	2.84297	7.17498	0.000743736
ENSOCUG00000023219	ASPG	2.57544	5.96053	0.000749957
ENSOCUG00000015973	DEFB110	-6.36033	0.0121717	0.000754412
ENSOCUG00000015115	RAPGEF5	-1.52139	0.34835	0.000772199
ENSOCUG00000006190	NCAM1	-1.16074	0.447284	0.000776729
ENSOCUG00000023106	SUN3	1.40976	2.65693	0.000776987
ENSOCUG00000031636		1.90971	3.75732	0.000779825
ENSOCUG00000031285		5.75421	53.9748	0.00078041
ENSOCUG00000000621	INHBA	-1.6324	0.322551	0.000787244
ENSOCUG00000029685	ZPBP2	3.27526	9.68168	0.000792683
ENSOCUG00000011158	FAM131B	1.04553	2.06412	0.000794255
ENSOCUG00000032550		5.036	32.8086	0.000797139
ENSOCUG00000016641	ADGRG3	-1.5003	0.353481	0.000811187
ENSOCUG00000007652	STMN4	3.62017	12.2964	0.000815112
ENSOCUG00000008908	KCNA2	2.66628	6.34792	0.000817974
ENSOCUG00000008553	PRUNE2	1.17111	2.25185	0.00085078
ENSOCUG00000027042	CCDC103	1.01476	2.02056	0.000863222
ENSOCUG00000014502	MC2R	-4.5105	0.0438738	0.000863222
ENSOCUG00000032490	CYBB	-1.2677	0.415321	0.000864875
ENSOCUG00000030290	FAM240A	-1.5391	0.3441	0.000877594
ENSOCUG00000007567	SLC38A11	-1.97525	0.254326	0.000880157
ENSOCUG00000017205	ISX	4.32459	20.037	0.000888432
ENSOCUG00000009976	HTR2A	2.50433	5.67384	0.000892655
ENSOCUG00000001367	TENT5D	2.38902	5.23801	0.000905468
ENSOCUG00000014475	KCNA4	-1.75685	0.295894	0.000906184
ENSOCUG00000006282	GCNT3	1.80057	3.48357	0.000911645
ENSOCUG00000033976		3.29757	9.83258	0.000913589
ENSOCUG00000031526	PMAIP1	1.41053	2.65835	0.000919737
ENSOCUG00000037085		-3.68114	0.0779588	0.000925701
ENSOCUG00000001462	INSYN2A	4.50518	22.7088	0.000934444
ENSOCUG00000021486		2.87341	7.32793	0.000942396
ENSOCUG00000034392		1.29843	2.4596	0.000960358
ENSOCUG00000027912	PRX	-1.01943	0.49331	0.000973756
ENSOCUG00000017315	RNASE11	-6.0339	0.0152621	0.000977638
ENSOCUG00000023033	LOC100352755	-2.18747	0.219536	0.000977638
ENSOCUG00000003146	QRICH2	-3.22307	0.107093	0.000984283
ENSOCUG00000035226		-1.03677	0.487416	0.000984819
ENSOCUG00000007757	LHX2	1.85533	3.61835	0.000985715
ENSOCUG00000026532	SCARA5	-1.05039	0.482839	0.000993165
ENSOCUG00000032226		-1.3252	0.399095	0.000995269
ENSOCUG00000034031		-4.7468	0.0372452	0.000998348
ENSOCUG00000032458		-4.88516	0.0338392	0.00100807
ENSOCUG00000024590	LOC100357686	1.45462	2.74084	0.00101289
ENSOCUG00000010646	FAM163B	5.43077	43.1346	0.00102099
ENSOCUG00000006426	TENT5B	-1.96245	0.256593	0.00102404
ENSOCUG00000009195	CLEC4E	-1.7403	0.299307	0.00102603
ENSOCUG00000012801	CRISP3	-1.63627	0.321687	0.00102603
ENSOCUG00000005848	MAEL	1.73865	3.33723	0.00102964
ENSOCUG00000029636	TGFA	1.98916	3.97005	0.00104776
ENSOCUG00000001102	L1CAM	-1.40237	0.378306	0.00105725
ENSOCUG00000033901	LOC103347276	1.87355	3.66434	0.00106527
ENSOCUG00000005589	ZAN	1.29248	2.44948	0.00106879
ENSOCUG00000002947	SOST	-1.29212	0.408351	0.00107013
ENSOCUG00000038847		-6.42233	0.0116597	0.00107488
ENSOCUG00000007574	KLK7	-1.28706	0.409785	0.00107916
ENSOCUG00000002342	VSIG8	-1.84943	0.277502	0.00108177
ENSOCUG00000000391	WFIKKN2	-1.30602	0.404435	0.00108627
ENSOCUG00000000927	ADAMTSL4	1.16148	2.23686	0.00108734
ENSOCUG00000001554	TANC2	-1.21371	0.431158	0.00108926
ENSOCUG00000020957	LOC100354078	1.45275	2.73729	0.00110631
ENSOCUG00000004988	LOXL4	1.40101	2.64086	0.00110787
ENSOCUG00000010998	IL36RN	2.82275	7.0751	0.00111758
ENSOCUG00000016920	NSUN7	1.29461	2.4531	0.00111962
ENSOCUG00000010551	SLC7A3	1.10382	2.14923	0.00112027
ENSOCUG00000033311		2.38834	5.23555	0.00112027
ENSOCUG00000004590	COL27A1	-1.20391	0.434096	0.00112385
ENSOCUG00000005284	IGSF3	-1.16335	0.446476	0.00112475
ENSOCUG00000037256		3.64675	12.5251	0.0011265
ENSOCUG00000029661	HMGCLL1	1.69348	3.23436	0.00112839
ENSOCUG00000032835		-2.41987	0.186873	0.00113644
ENSOCUG00000030141	TPBGL	1.4713	2.77271	0.00114194
ENSOCUG00000010104	FN1	-1.11115	0.462924	0.00114662
ENSOCUG00000017761	TCF21	-1.34716	0.393065	0.00115249
ENSOCUG00000015848	LOC100338346	2.45924	5.49926	0.00115425
ENSOCUG00000023853	LOC100357467	3.53557	11.5961	0.0011686
ENSOCUG00000021846		3.33382	10.0828	0.00120493
ENSOCUG00000007833	DLX3	1.35737	2.56217	0.00121273
ENSOCUG00000011942	FLNC	-1.01515	0.494777	0.00121763
ENSOCUG00000010210	CFAP47	2.30289	4.93446	0.00121836
ENSOCUG00000016258	FOXR1	2.12049	4.34842	0.00121947
ENSOCUG00000033137		-1.45761	0.364096	0.00122091
ENSOCUG00000004037	SYCP2	1.40879	2.65515	0.00122127
ENSOCUG00000011089	ITIH4	1.46149	2.75393	0.00124963
ENSOCUG00000036405		5.31583	39.8312	0.00125432
ENSOCUG00000037983		-2.28031	0.205853	0.00125983
ENSOCUG00000035937		-1.06617	0.477586	0.00126063
ENSOCUG00000026233	PLAAT2	2.15726	4.46065	0.00126817
ENSOCUG00000026163	OR6Y1	-2.88112	0.135737	0.00126943
ENSOCUG00000032092	STARD13	-1.60687	0.328309	0.00128512
ENSOCUG00000012683	ADAM33	-1.91928	0.264387	0.00130878
ENSOCUG00000030161		1.12888	2.18689	0.00131189
ENSOCUG00000024939	IFIT2	-1.3004	0.406014	0.001326
ENSOCUG00000003317	ZNF215	1.25195	2.38162	0.00133937
ENSOCUG00000013022	RNASE4	-1.23928	0.423583	0.00133937
ENSOCUG00000006901	ANKRD1	-1.23792	0.423985	0.00133986
ENSOCUG00000026736	SGCA	-1.01556	0.494636	0.00136361
ENSOCUG00000037217		-1.31488	0.401958	0.00136975
ENSOCUG00000002487	LGALS2	2.03116	4.08734	0.00136991
ENSOCUG00000017872	RASSF9	1.0307	2.04302	0.00137604
ENSOCUG00000021414	RIIAD1	1.00982	2.01366	0.00137787
ENSOCUG00000010229	MYH8	1.69342	3.23423	0.00138378
ENSOCUG00000003953	C1orf146	2.19958	4.59347	0.00138388
ENSOCUG00000024434	LOC100346274	-1.06074	0.479385	0.00138802
ENSOCUG00000029466	TMEM35B	-1.23419	0.425082	0.00138939
ENSOCUG00000029190	PLAC8	1.87301	3.66295	0.00139057
ENSOCUG00000036010		2.84363	7.17822	0.00139314
ENSOCUG00000014245	METRNL	1.09431	2.13512	0.00140612
ENSOCUG00000031298		-1.8613	0.275229	0.00140612
ENSOCUG00000021240	MLC1	2.84328	7.17649	0.00140737
ENSOCUG00000006723	EPHA4	-1.19072	0.438085	0.00141718
ENSOCUG00000009781	SNX31	-4.2338	0.0531495	0.00142526
DTOCUGDMRTB1	DMRTB1	1.65909	3.15818	0.00142583
ENSOCUG00000008010	P2RX5	-1.27099	0.414374	0.00142968
ENSOCUG00000005933	ACSM2B	1.85994	3.62991	0.00143994
ENSOCUG00000006540	PLCB2	-1.05797	0.480307	0.0014422
ENSOCUG00000019198	MIR760	-1.1201	0.460061	0.0014625
ENSOCUG00000012080	SLC18A2	1.41018	2.65771	0.00146965
ENSOCUG00000039593		-2.21476	0.215423	0.00147627
ENSOCUG00000012863	CDHR3	1.06489	2.09202	0.00151732
ENSOCUG00000000829	CYP2S1	1.00115	2.0016	0.00151942
ENSOCUG00000026663	NPFF	-1.13682	0.45476	0.00151942
ENSOCUG00000004579	NRP1	-1.26931	0.414858	0.0015495
ENSOCUG00000004900	PALLD	-1.00838	0.497104	0.00155086
ENSOCUG00000007303	CHRNA10	-2.8729	0.136512	0.0015561
ENSOCUG00000026700	LOC100337825	-1.75966	0.295318	0.00155878
ENSOCUG00000008469	MOXD1	1.38896	2.6189	0.00156463
ENSOCUG00000005396	PINLYP	-2.09284	0.234418	0.00156463
ENSOCUG00000024754	GNAT3	-2.49295	0.177643	0.00156852
ENSOCUG00000026544	CYP2A11	3.56045	11.7978	0.00157237
ENSOCUG00000007386	CLEC1B	1.45301	2.73779	0.00158161
ENSOCUG00000002453	EN2	2.65524	6.29952	0.00158514
ENSOCUG00000009285	C11orf53	2.55958	5.89535	0.00158755
ENSOCUG00000017160	POU5F1	1.85477	3.61695	0.00159612
ENSOCUG00000009322	MCOLN2	1.55533	2.93901	0.00161046
ENSOCUG00000005311	IL17RE	1.64223	3.12148	0.00161074
ENSOCUG00000008802	SPX	-1.55181	0.341082	0.00162921
ENSOCUG00000035827		5.36227	41.1344	0.00164667
ENSOCUG00000014684		2.89971	7.46276	0.00166247
ENSOCUG00000017832	TRPC6	1.06916	2.09821	0.00166725
ENSOCUG00000009679	THEM5	-1.09096	0.469447	0.00167116
ENSOCUG00000027985	TNFRSF12A	-1.30188	0.405598	0.00167275
ENSOCUG00000033788		1.41088	2.659	0.00170905
ENSOCUG00000037286		3.37151	10.3497	0.00171445
ENSOCUG00000005590	CBLB	-1.1058	0.464645	0.00172003
ENSOCUG00000000974	RASGRP2	-1.20344	0.434238	0.00172472
ENSOCUG00000023717	CNKSR1	1.32461	2.50464	0.00172552
ENSOCUG00000011191	CARD11	-1.09676	0.467566	0.00174395
ENSOCUG00000014125	PGM5	-2.23311	0.2127	0.00175786
ENSOCUG00000025295	NTF4	-1.23304	0.42542	0.00177819
ENSOCUG00000002935	TENT5C	-1.48187	0.358024	0.00178125
ENSOCUG00000005141	CHST11	-1.07715	0.473965	0.00179205
ENSOCUG00000014747	IL13RA2	-1.22368	0.428189	0.00179336
[truncated: 767 more rows]

## Sheet: KO-XY vs KO-XX
Table S1: List of DEGs in DMRT1-/- gonads (XY and XX) compared to control gonads (XY and XX) (adjusted p-value < 0.05 and |log2FC|>1)
KO-XY vs KO-XY
Rabbit gene ID	Gene name	log2FC	FC	adj pValue
ENSOCUG00000025290		-3.88956	0.0674724	7.56132e-24
ENSOCUG00000039581		-2.94886	0.12951	2.75452e-20
ENSOCUG00000027803	SH3GL3	-1.56195	0.338694	1.01322e-12
ENSOCUG00000014028	RAMACL	-4.97269	0.0318472	5.3459e-11
ENSOCUG00000026894	TM6SF1	-3.15398	0.112346	1.22303e-08
ENSOCUG00000029602	PNLIP	1.79409	3.46796	1.05806e-06
ENSOCUG00000011451		4.50084	22.6406	6.97641e-05
ENSOCUG00000027653	LSM3	2.02641	4.0739	9.44318e-05
ENSOCUG00000000527	DPYSL4	-1.45168	0.365594	0.000428912
ENSOCUG00000029681	NRXN3	-1.66594	0.315138	0.000661642
ENSOCUG00000012353	SDSL	1.71564	3.28442	0.00127826
ENSOCUG00000037044	PTMA	-2.40471	0.188846	0.0013428
ENSOCUG00000010101	IRF5	1.55366	2.9356	0.00211606
ENSOCUG00000001387	TDRKH	1.20036	2.29798	0.00279981
ENSOCUG00000021184		1.5131	2.85423	0.00290314
ENSOCUG00000031212		-2.74148	0.149532	0.0043006
ENSOCUG00000010392	DPEP1	1.40812	2.6539	0.00446367
ENSOCUG00000003917	COL24A1	-1.49955	0.353665	0.00460181
ENSOCUG00000000378	SPO11	1.21292	2.31806	0.00499611
ENSOCUG00000008670	SSTR1	-1.57331	0.336037	0.00547928
ENSOCUG00000014105	GABRG1	-1.17291	0.443526	0.00608596
ENSOCUG00000004688	PKHD1L1	-1.92567	0.263218	0.00653906
ENSOCUG00000022168	SDS	1.96389	3.90112	0.00800627
ENSOCUG00000007772	TMC3	1.33256	2.51848	0.00800627
ENSOCUG00000009115		-1.30578	0.404504	0.0100182
ENSOCUG00000031681		-1.47497	0.35974	0.0124893
ENSOCUG00000012458	FUT9	-1.35015	0.392252	0.014828
ENSOCUG00000016034	OIT3	1.27762	2.42439	0.0166334
ENSOCUG00000024715		-2.87708	0.136117	0.01875
ENSOCUG00000008290	HSP90AB1	-1.30651	0.404298	0.0192096
ENSOCUG00000015949	CRB1	-1.43008	0.371111	0.019506
ENSOCUG00000029659	PASD1	1.19918	2.2961	0.0196901
ENSOCUG00000011613	ALDH8A1	3.94722	15.4252	0.0202531
ENSOCUG00000037025		1.22559	2.33851	0.0251381
ENSOCUG00000011128	GLI1	1.41344	2.66371	0.0251381
ENSOCUG00000000703	MOCOS	-1.48351	0.357619	0.0251381
ENSOCUG00000017729	SCN7A	-1.26037	0.417438	0.0253723
ENSOCUG00000007440	ITGAD	3.91664	15.1017	0.0280435
ENSOCUG00000007196	C1orf127	-1.48339	0.357648	0.0296281
ENSOCUG00000024754	GNAT3	-2.56633	0.168833	0.0297143
ENSOCUG00000032969		1.26448	2.40241	0.0351567
ENSOCUG00000009048	SERPIND1	4.81013	28.0539	0.0351567
ENSOCUG00000008064	TRDN	-1.5144	0.350042	0.0351567
ENSOCUG00000014421	MPZ	1.85789	3.62478	0.0356403
ENSOCUG00000007502	ELF3	1.31297	2.48452	0.0358542
ENSOCUG00000009512	PLA1A	3.48246	11.177	0.0382957
ENSOCUG00000006175	NUTM1	1.27209	2.41511	0.0393967
ENSOCUG00000025226	BMP5	1.61705	3.06747	0.0433291
ENSOCUG00000006258	WDR72	-1.04992	0.482995	0.0433291
ENSOCUG00000002028	USH1C	3.52353	11.4997	0.0441267
ENSOCUG00000028983	U2	-1.32313	0.399667	0.0446993

## Sheet: KO-XX vs Control-XX
Supplementary File 1: List of DEGs in DMRT1-/- gonads (XY and XX) compared to control gonads (XY and XX) (adjusted p-value < 0.05 and |log2FC|>1)
KO-XX vs Control-XX
Rabbit gene ID	Gene name	log2FC	FC	adj pValue
ENSOCUG00000005249	DDAH1	1.9098	3.75757	6.85662e-25
ENSOCUG00000004582	DMRT3	2.27404	4.83675	1.33092e-17
ENSOCUG00000002877	PLCXD3	4.26494	19.2254	1.11185e-16
ENSOCUG00000002467	ZP4	-1.49531	0.354706	6.27563e-16
ENSOCUG00000017021	SLC30A3	3.16468	8.96734	3.45474e-13
ENSOCUG00000000653	NDRG2	-1.26024	0.417475	3.45474e-13
ENSOCUG00000002530	PTGS1	1.87607	3.67073	5.93199e-13
ENSOCUG00000014250	LOC103351160	-1.67264	0.31368	3.04769e-10
ENSOCUG00000016497	COL11A2	-1.88072	0.271548	1.20219e-08
ENSOCUG00000008620	DAPL1	1.50712	2.84242	2.2498e-08
ENSOCUG00000004635	AQP2	-1.51203	0.350617	7.32731e-08
ENSOCUG00000001373	BRINP1	1.15793	2.23138	7.32731e-08
ENSOCUG00000016904	PLXNC1	2.09352	4.26787	7.48143e-08
ENSOCUG00000013284	ST18	2.82783	7.10005	7.48143e-08
ENSOCUG00000002909	GRB14	-1.21865	0.429684	2.38878e-07
ENSOCUG00000013003	SCN3A	2.96431	7.80451	2.38878e-07
ENSOCUG00000011487	DKK1	1.54263	2.91326	3.59992e-07
ENSOCUG00000001864	AQP8	-1.88326	0.271071	3.60626e-07
ENSOCUG00000001353	UCHL1	1.48509	2.79935	1.12934e-06
ENSOCUG00000006913	TTLL8	2.12845	4.37246	1.26012e-06
ENSOCUG00000011736	CA3	-2.38114	0.191958	1.42813e-06
ENSOCUG00000016603	ANGPTL4	-1.02614	0.491024	4.73458e-06
ENSOCUG00000008954	GADD45A	1.38484	2.61143	4.88107e-06
ENSOCUG00000004688	PKHD1L1	2.56656	5.92396	6.82213e-06
ENSOCUG00000011455	PTPRQ	1.58773	3.00576	6.82213e-06
ENSOCUG00000025022	NUPR1	3.62426	12.3314	7.8503e-06
ENSOCUG00000015312	PDGFD	1.26062	2.39598	1.32702e-05
ENSOCUG00000001508	CUZD1	-1.9381	0.26096	1.57152e-05
ENSOCUG00000017051	BPIFB1	-3.09319	0.117181	1.74103e-05
ENSOCUG00000025172	KCNK3	-1.00516	0.498214	2.01904e-05
ENSOCUG00000010728	APOA1	-1.19085	0.438045	2.1225e-05
ENSOCUG00000029312	SLC32A1	3.07525	8.42836	3.51014e-05
ENSOCUG00000006239	CSMD3	1.84505	3.59266	4.32412e-05
ENSOCUG00000034782	OAS1	-1.25059	0.420275	4.32412e-05
ENSOCUG00000012544	KIRREL3	1.33725	2.52669	4.32412e-05
ENSOCUG00000014466		-1.11388	0.462049	4.55212e-05
ENSOCUG00000011021	MYBPH	-1.34989	0.392321	5.47655e-05
ENSOCUG00000023100	CAPN12	-1.00032	0.499888	7.13618e-05
ENSOCUG00000026600	ASIC4	2.26287	4.79947	0.00011187
ENSOCUG00000007424	PCYT1B	1.00831	2.01155	0.000114303
ENSOCUG00000029297	LMO3	1.3057	2.47203	0.000165951
ENSOCUG00000008178	PNLIPRP1	1.4302	2.69484	0.000188809
ENSOCUG00000006341	CALB1	3.34021	10.1275	0.000191368
ENSOCUG00000021148	SHISA9	1.3314	2.51647	0.000199971
ENSOCUG00000009760	ETV3	1.36884	2.58263	0.000202012
ENSOCUG00000034716		-1.92054	0.264156	0.000248158
ENSOCUG00000002112	MYBPC3	-1.44134	0.368225	0.000283842
ENSOCUG00000029804		-1.06517	0.477916	0.000291573
ENSOCUG00000025897	RNF2	1.37146	2.58733	0.000299322
ENSOCUG00000021297	TRIM29	1.20997	2.31333	0.00032107
ENSOCUG00000022782	CHRDL2	-1.26277	0.416744	0.000342304
ENSOCUG00000001903	NOS2	-1.07984	0.473083	0.000405961
ENSOCUG00000011780	CYFIP2	1.25153	2.38094	0.0004173
ENSOCUG00000027865	CYP11A1	-1.1229	0.459171	0.000501393
ENSOCUG00000015699	ASIC1	1.89764	3.72602	0.0005412
ENSOCUG00000008288	ECM2	-1.28818	0.409466	0.000715782
ENSOCUG00000033137		-1.80137	0.286902	0.000729175
ENSOCUG00000030607		3.11713	8.67662	0.000729175
ENSOCUG00000004511	HSPB8	1.35041	2.54985	0.0008655
ENSOCUG00000007427	FAT3	1.98116	3.9481	0.00140296
ENSOCUG00000024465	COL8A1	1.61235	3.0575	0.00143888
ENSOCUG00000005358	ACOT12	-1.77725	0.291739	0.00146351
ENSOCUG00000009515	POPDC2	1.48255	2.79442	0.00146351
ENSOCUG00000014093	GNRH1	-1.37603	0.385278	0.00152081
ENSOCUG00000024536	SPTSSB	1.01375	2.01915	0.00169672
ENSOCUG00000027106	HAS2	1.14088	2.20515	0.00191013
ENSOCUG00000014678	KLHL34	-1.10068	0.466297	0.00195325
ENSOCUG00000007538	BPIFA1	-2.44162	0.184077	0.00225819
ENSOCUG00000014876	ARL5B	1.00555	2.00771	0.00237306
ENSOCUG00000034885		1.21376	2.31941	0.00257431
ENSOCUG00000014204	FUT4	1.14552	2.21226	0.00266664
ENSOCUG00000001012	SLC18A1	2.34557	5.0826	0.00306296
ENSOCUG00000022248	RUFY4	-1.29651	0.407111	0.0030977
ENSOCUG00000005519	ARMC12	-1.12727	0.457782	0.00337122
ENSOCUG00000017691	UNC5D	1.20994	2.31328	0.00361157
ENSOCUG00000027634	LOC100351380	1.37571	2.59496	0.00386738
ENSOCUG00000006557	LOC100349757	-1.13087	0.456641	0.00386738
ENSOCUG00000002947	SOST	1.47568	2.78114	0.00414852
ENSOCUG00000014089	PLD1	1.20569	2.30648	0.00431201
ENSOCUG00000036560		1.69363	3.23469	0.00450105
ENSOCUG00000017872	RASSF9	1.09603	2.13766	0.00467498
ENSOCUG00000009050	RELN	1.91404	3.76862	0.00480026
ENSOCUG00000028331	SNORD113-4	-1.16119	0.447145	0.00508243
ENSOCUG00000033787		1.08946	2.12794	0.00550434
ENSOCUG00000014522	RAB38	1.20792	2.31004	0.00641799
ENSOCUG00000011554		1.00433	2.00601	0.00673319
ENSOCUG00000015811	PIP5K1B	1.74254	3.34624	0.00815892
ENSOCUG00000034795		2.15703	4.45995	0.00822487
ENSOCUG00000001309	ISM1	-1.16631	0.445558	0.00824495
ENSOCUG00000026663	NPFF	-1.20591	0.433495	0.00824495
ENSOCUG00000033442	0	-1.12231	0.459357	0.00841991
ENSOCUG00000039375	0	-1.85043	0.27731	0.0088489
ENSOCUG00000006833	DNAH12	-1.13337	0.455851	0.0091111
ENSOCUG00000027662	C16orf71	1.57746	2.98445	0.00911409
ENSOCUG00000012708	C9	-1.86922	0.273721	0.00912503
ENSOCUG00000002935	TENT5C	1.57094	2.97098	0.00930734
ENSOCUG00000011944	ENPP6	-1.30295	0.405296	0.00934262
ENSOCUG00000004647	CSTF2T	1.91734	3.77725	0.0100561
ENSOCUG00000012349	COL7A1	-1.00295	0.498979	0.0104996
ENSOCUG00000002135	TAP1	-1.10629	0.464487	0.0109479
ENSOCUG00000026567	HLA-DMB	-1.0606	0.479431	0.0111111
ENSOCUG00000030212		1.50954	2.8472	0.0111841
ENSOCUG00000033029		1.38395	2.60981	0.011839
ENSOCUG00000008908	KCNA2	2.49043	5.61944	0.0125292
ENSOCUG00000034290		1.24998	2.37838	0.012897
ENSOCUG00000023526	LOC100342857	3.70853	13.0731	0.0129735
ENSOCUG00000006783	VWF	-1.13506	0.455315	0.0131638
ENSOCUG00000003905	CCN1	1.15797	2.23143	0.0143852
ENSOCUG00000021240	MLC1	2.7077	6.53278	0.0143997
ENSOCUG00000032916		1.38719	2.61568	0.0147232
ENSOCUG00000031765		-1.34409	0.393904	0.0152431
ENSOCUG00000011691	STK17B	1.29856	2.45983	0.0152914
ENSOCUG00000032782	RPSA	4.4142	21.3209	0.0154449
ENSOCUG00000039071		1.70612	3.26282	0.0161215
ENSOCUG00000036916		1.05076	2.07162	0.0162639
ENSOCUG00000011101		1.38261	2.6074	0.0170128
ENSOCUG00000038906		1.50943	2.84697	0.0170827
ENSOCUG00000010548	ARHGAP5	1.13371	2.19423	0.017249
ENSOCUG00000024837	TMEM151B	1.54514	2.91832	0.0174263
ENSOCUG00000022632	TMEM170B	1.09157	2.13105	0.0189083
ENSOCUG00000003312	ONECUT1	-1.58167	0.334094	0.0196491
ENSOCUG00000005808	PDLIM3	1.09181	2.13141	0.0199613
ENSOCUG00000034936	PDLIM3	1.5814	2.99259	0.0199613
ENSOCUG00000001277	NECAB1	1.51355	2.85512	0.0204884
ENSOCUG00000037167		1.42406	2.68339	0.0221636
ENSOCUG00000038723		1.24591	2.37168	0.0222077
ENSOCUG00000005721	ADRA1B	1.93984	3.83663	0.0222077
ENSOCUG00000012080	SLC18A2	-1.15794	0.448152	0.0222499
ENSOCUG00000010651	TEX101	-1.25897	0.417841	0.0222908
ENSOCUG00000023252		-1.04795	0.483656	0.0230726
ENSOCUG00000005558	PXDNL	1.35927	2.56555	0.025271
ENSOCUG00000007033	PAK3	1.18365	2.2715	0.0276979
ENSOCUG00000007266	SCN1A	2.18797	4.55663	0.030408
ENSOCUG00000030668		1.15509	2.22699	0.0317155
ENSOCUG00000013503	FAM189A2	-1.02587	0.491115	0.0340459
ENSOCUG00000024444	CRHR2	-1.25419	0.419229	0.0359584
ENSOCUG00000025236	LOC100009166	-1.34426	0.393855	0.0366081
ENSOCUG00000033012		8.81283	449.702	0.038477
ENSOCUG00000036479		-3.12184	0.114877	0.0401696
ENSOCUG00000013209	PTPRZ1	-1.02766	0.490506	0.0434941
ENSOCUG00000013482	CYTL1	1.32992	2.51389	0.0436655
ENSOCUG00000013076	APOBR	-1.04084	0.486043	0.043735
ENSOCUG00000015511	ABHD12B	1.56327	2.95523	0.0438666
ENSOCUG00000001986	PLCD4	-1.60408	0.328944	0.0438666
ENSOCUG00000009404	KIF19	2.89436	7.43513	0.0446973
ENSOCUG00000023549		-4.2339	0.053146	0.0447107
ENSOCUG00000013304	HLA-E	-1.14787	0.45129	0.045886
ENSOCUG00000005061	LOC100338194	-2.04319	0.242626	0.0463675
ENSOCUG00000026122		2.94905	7.72243	0.0464157
ENSOCUG00000007278	LOC103352512	1.26533	2.40383	0.04667
ENSOCUG00000033208		1.63057	3.09636	0.0472011
ENSOCUG00000009952	NDST3	1.11356	2.1638	0.0478268

## Sheet: Control-XY vs Control-XX
Table S1: List of DEGs in DMRT1-/- gonads (XY and XX) compared to control gonads (XY and XX) (adjusted p-value < 0.05 and |log2FC|>1)
Control-XY vs Control-XX
Rabbit gene ID	Gene name	log2FC	FC	adj pValue
ENSOCUG00000017210	NPTX2	9.24792	607.997	9.4377e-254
ENSOCUG00000002566	SHBG	6.40081	84.4957	7.51171e-240
ENSOCUG00000021430	NEFM	6.61354	97.9205	1.26227e-203
DTOCUGAMH	AMH	8.26729	308.108	3.80806e-194
ENSOCUG00000024805	COL28A1	7.25094	152.318	7.69213e-181
ENSOCUG00000023705	TM7SF2	3.77741	13.7124	1.30458e-180
ENSOCUG00000033942		5.43604	43.2923	4.17915e-159
ENSOCUG00000000271	MAMDC2	-3.12619	0.114531	4.51642e-155
DTOCUGRSPO1	RSPO1	-4.35738	0.0487861	6.52133e-144
ENSOCUG00000005007	KCNE5	5.02421	32.5416	6.88286e-135
ENSOCUG00000014516	CCDC68	5.35312	40.8742	6.7747e-118
ENSOCUG00000021311		4.40189	21.1399	1.45879e-117
ENSOCUG00000023697	LRRN1	-2.80189	0.143399	4.16855e-112
ENSOCUG00000033850		-4.60574	0.041071	7.79286e-111
ENSOCUG00000002024	SFTPC	8.39136	335.778	1.19596e-108
ENSOCUG00000000134	NTNG2	-6.28569	0.0128179	8.36929e-106
ENSOCUG00000016966	UNC80	-5.10485	0.0290594	9.7948e-106
ENSOCUG00000001151	DAPP1	6.62973	99.0257	1.08508e-103
ENSOCUG00000015860	KIAA1210	3.75958	13.544	8.79555e-101
ENSOCUG00000006499	MGARP	4.89521	29.7581	8.79555e-101
ENSOCUG00000009346	CHRM3	-3.79146	0.0722197	4.98282e-99
ENSOCUG00000000670	SLITRK6	4.60091	24.2668	1.38313e-97
ENSOCUG00000029219	DHH	3.75292	13.4816	1.02699e-96
ENSOCUG00000004635	AQP2	-6.15595	0.014024	1.54695e-96
ENSOCUG00000010649	MKX	-4.72636	0.0377768	6.14912e-96
DTOCUGFOXL2	FOXL2	-7.98431	0.00394898	8.82263e-94
ENSOCUG00000005789	LOC100339773	9.02662	521.535	2.30718e-92
ENSOCUG00000005244	LRRTM1	-2.98191	0.126577	3.93973e-91
ENSOCUG00000022950	PHLDA1	-3.50641	0.0879964	3.83656e-90
ENSOCUG00000005094	INHBB	3.99907	15.9897	4.89121e-89
ENSOCUG00000032261		4.88167	29.4801	1.51045e-87
ENSOCUG00000007492	LMOD1	2.93772	7.66199	7.11197e-87
ENSOCUG00000014250	LOC103351160	-6.36272	0.0121515	2.60796e-84
ENSOCUG00000002909	GRB14	3.38185	10.4241	6.41559e-84
ENSOCUG00000026120	FOLH1	3.33186	10.0691	2.82122e-82
ENSOCUG00000001546	TOX3	-2.82451	0.141169	2.14741e-79
ENSOCUG00000005190	DHCR24	2.73698	6.66675	4.11216e-79
ENSOCUG00000006938	CSDC2	2.28618	4.87761	3.28312e-77
ENSOCUG00000004228	PRSS33	6.17702	72.3549	6.4398e-76
ENSOCUG00000013186	TNFRSF13C	-4.68215	0.0389523	1.81889e-75
ENSOCUG00000000171	GREM2	2.94961	7.72541	2.58925e-75
ENSOCUG00000008959	MYOZ2	9.48649	717.326	1.78764e-73
ENSOCUG00000013230	MTCL1	2.65337	6.29137	6.06482e-73
ENSOCUG00000024977	ACSBG1	3.63388	12.4138	7.82563e-71
ENSOCUG00000008531	HSD17B3	3.76572	13.6018	4.24397e-70
ENSOCUG00000023836	NEFL	3.68382	12.8511	6.5337e-70
ENSOCUG00000012303	CYP19A1	-5.14522	0.0282575	3.00872e-69
ENSOCUG00000012344	KHDRBS2	-4.38643	0.0478137	1.79069e-68
ENSOCUG00000014215	MOGAT2	-4.36745	0.0484471	3.62267e-68
ENSOCUG00000015136	NIBAN1	5.50954	45.555	2.66891e-66
ENSOCUG00000022218	SPRY3	3.06123	8.34686	4.86312e-65
ENSOCUG00000016506	PLXNB3	3.69626	12.9624	7.95991e-65
ENSOCUG00000011021	MYBPH	-6.49541	0.0110837	1.18726e-64
ENSOCUG00000009796	AQP9	-5.18725	0.0274463	1.35459e-63
ENSOCUG00000024690	KCTD8	4.06918	16.786	2.60718e-63
ENSOCUG00000005263	TOX	3.31273	9.93648	2.74905e-63
ENSOCUG00000016033	WNT10A	-7.14013	0.00708937	1.17568e-62
ENSOCUG00000012811	SMOC1	-1.75413	0.296453	2.13101e-62
ENSOCUG00000012217	APCDD1	-2.61743	0.162958	4.56885e-62
ENSOCUG00000009581	TACR3	-5.6108	0.0204635	1.48729e-61
ENSOCUG00000027192	NPY5R	-3.61814	0.0814385	1.95244e-60
ENSOCUG00000013530	CCDC170	-3.93886	0.0652058	3.2687e-60
ENSOCUG00000008623	TMEM229B	3.04161	8.2341	9.37392e-60
ENSOCUG00000026348	KCNIP2	3.74507	13.4085	1.381e-59
ENSOCUG00000013731	RUNX1	-3.57965	0.0836408	1.82005e-59
ENSOCUG00000008784	NALCN	-4.0205	0.0616183	2.72019e-59
ENSOCUG00000025335	SYNPO2L	4.76061	27.1073	1.20653e-58
ENSOCUG00000025494	SCG3	3.5791	11.9514	1.97848e-57
ENSOCUG00000004491	CCDC73	-2.87021	0.136767	2.23933e-56
ENSOCUG00000006696		-7.11173	0.00723027	2.48636e-56
ENSOCUG00000020990		3.13968	8.81329	3.40766e-56
ENSOCUG00000005085	CASR	-7.80725	0.00446462	2.72753e-55
ENSOCUG00000008378	DPP10	-2.84537	0.139142	4.12609e-55
ENSOCUG00000005043	LIPH	4.29321	19.6058	1.14068e-54
ENSOCUG00000007830	IL31RA	-4.48998	0.0445021	1.31306e-54
ENSOCUG00000009428	RAB6B	-2.59561	0.165441	4.98657e-53
ENSOCUG00000005253	GNAL	-2.64798	0.159543	2.15212e-52
ENSOCUG00000009941	RUBCNL	3.02983	8.16712	2.28369e-51
ENSOCUG00000014275	LOC100353214	4.72701	26.4833	4.67926e-51
ENSOCUG00000024610	CLPS	-5.05402	0.0301016	7.61139e-51
ENSOCUG00000017790	CYP17A1	3.4838	11.1874	1.12187e-50
ENSOCUG00000024647	KCNE2	-5.18682	0.0274544	1.63982e-50
ENSOCUG00000015299	ARHGAP36	-3.58179	0.083517	2.2135e-50
DTOCUGHSD3Bbeta	HSD3Bbeta	13.1735	9239.01	5.62877e-50
ENSOCUG00000004364	SALL1	-6.33585	0.01238	2.00853e-49
ENSOCUG00000024881		-4.9966	0.0313237	3.17597e-49
ENSOCUG00000013016	MAPK4	-2.76061	0.147562	5.47674e-49
ENSOCUG00000024221	INMT	4.6518	25.138	5.088e-48
ENSOCUG00000007622	ADGRG1	2.06113	4.17314	8.66103e-48
ENSOCUG00000025884	RCAN2	2.18301	4.541	6.70973e-47
ENSOCUG00000010372	MAP3K21	3.28785	9.76653	8.04853e-47
ENSOCUG00000011639	SOX9	2.69181	6.46124	9.41952e-47
ENSOCUG00000002507	STAR	3.14015	8.81615	1.44096e-46
ENSOCUG00000039586		-5.89643	0.016788	1.58828e-46
ENSOCUG00000008628	PNPLA1	-3.6925	0.0773478	1.5982e-46
ENSOCUG00000015307	SLC35F1	-2.34111	0.197358	1.65922e-46
ENSOCUG00000035803		-4.62946	0.0404012	2.44249e-46
ENSOCUG00000008316	STRIP2	2.74706	6.71349	3.51126e-46
ENSOCUG00000012233	GGT5	3.72773	13.2482	1.86838e-45
ENSOCUG00000014102	JCAD	2.86335	7.27701	2.07685e-45
ENSOCUG00000038903		-3.0227	0.123049	6.97183e-45
ENSOCUG00000025015	EDAR	-2.43492	0.184934	9.00244e-45
ENSOCUG00000027072		-2.78547	0.145041	1.86302e-44
ENSOCUG00000010286	DOCK3	3.41478	10.6648	5.2963e-44
ENSOCUG00000000266	WNT2B	-2.36611	0.193967	7.11153e-44
ENSOCUG00000023746	LOC100347786	-1.56877	0.337096	9.82359e-44
ENSOCUG00000008631	AGFG2	2.51619	5.7207	1.48432e-43
ENSOCUG00000010196	REEP1	-2.30308	0.20263	3.7193e-43
ENSOCUG00000004783	NKAIN1	2.58075	5.98249	4.5767e-43
ENSOCUG00000000706	FHOD3	3.96182	15.5821	1.08464e-42
ENSOCUG00000007855	PXYLP1	-1.63901	0.321076	1.54879e-42
ENSOCUG00000033778		-2.89604	0.13434	3.44899e-42
ENSOCUG00000001863	VAT1L	-2.61468	0.163269	7.54603e-41
ENSOCUG00000011657	DRD2	-3.33794	0.0988963	1.07521e-40
ENSOCUG00000023590		3.06922	8.39319	1.27728e-40
ENSOCUG00000006386	ATP10A	-1.58134	0.334172	2.02765e-40
ENSOCUG00000012489	PTCH2	2.03574	4.10032	2.08309e-40
ENSOCUG00000012556	NFATC2	2.51133	5.70144	3.86005e-40
ENSOCUG00000005228	NKD1	-2.34063	0.197424	3.96512e-40
ENSOCUG00000017322	ERBB3	3.4115	10.6405	2.9481e-39
ENSOCUG00000010524	RBP4	4.33852	20.2314	1.52679e-38
ENSOCUG00000014979	MBNL3	2.53869	5.81059	4.36965e-38
ENSOCUG00000006839	PGBD5	2.37377	5.18293	4.73175e-38
ENSOCUG00000021324	NDP	2.38714	5.2312	5.66016e-38
ENSOCUG00000002701	CHADL	3.31245	9.93453	7.43607e-38
ENSOCUG00000008823	P2RX7	1.82165	3.53486	7.9696e-38
DTOCUGHSD3Balpha	HSD3Balpha	9.20453	589.984	9.25128e-38
ENSOCUG00000025172	KCNK3	-2.49511	0.177377	1.94006e-37
ENSOCUG00000004598	TNIK	3.46985	11.0797	2.56507e-37
ENSOCUG00000008325	ALDH2	1.75563	3.37674	2.64689e-37
ENSOCUG00000011172	OPCML	4.70414	26.0668	2.87866e-37
ENSOCUG00000009197	DCAF13	-1.64613	0.319495	3.36944e-37
ENSOCUG00000012007	PRR5L	1.84762	3.59906	3.41474e-37
ENSOCUG00000003569	HMGCS1	2.5869	6.00808	5.6247e-37
ENSOCUG00000003371	SELENBP1	2.35169	5.1042	1.41427e-36
ENSOCUG00000006729	GRK3	-1.93492	0.261536	2.61535e-36
ENSOCUG00000012022	EOGT	-1.44012	0.368537	7.20635e-36
ENSOCUG00000003040	ADAMTS3	2.83613	7.14102	7.98291e-36
ENSOCUG00000000508	OLFM3	-2.63721	0.160738	1.09415e-35
ENSOCUG00000028213	PIFO	-5.97328	0.0159171	1.53428e-35
ENSOCUG00000016605	AKR1B1	2.26526	4.80741	2.1827e-35
ENSOCUG00000024593	AOX4	-1.89358	0.269138	3.24191e-35
ENSOCUG00000008489	SLC30A8	-2.05702	0.240312	3.69713e-35
ENSOCUG00000021648	KCNK12	-3.67927	0.0780601	3.98119e-35
ENSOCUG00000016496	MLPH	5.48618	44.8235	4.81398e-35
ENSOCUG00000000252	DIRAS2	-3.77143	0.0732295	5.37764e-35
ENSOCUG00000002719	EPN3	2.00204	4.00567	7.32075e-35
ENSOCUG00000004959	HHIP	5.75797	54.1154	8.04677e-35
ENSOCUG00000021736		2.25347	4.76827	1.40154e-34
ENSOCUG00000013534	ENPP2	1.83575	3.56958	1.43463e-34
ENSOCUG00000008177	MGAM	-4.4235	0.046601	1.89087e-34
ENSOCUG00000010280	PGRMC1	1.2607	2.39612	2.06135e-34
ENSOCUG00000025013	SLC45A3	3.73676	13.3314	2.07394e-34
ENSOCUG00000036212	PCP4	3.76146	13.5616	4.19911e-34
ENSOCUG00000005165	ADRA2A	3.08343	8.47628	5.24871e-34
ENSOCUG00000016904	PLXNC1	4.02197	16.2455	6.21608e-34
ENSOCUG00000021803		3.06295	8.35681	7.11397e-34
ENSOCUG00000003240	IRX5	-4.9146	0.0331558	8.64156e-34
ENSOCUG00000001457	MYF6	-3.4501	0.0914991	1.26071e-33
ENSOCUG00000013514	MGST1	2.77458	6.84277	1.3068e-33
ENSOCUG00000017729	SCN7A	-4.71282	0.0381329	1.4858e-33
ENSOCUG00000006661	TRIM47	2.41623	5.33773	2.02627e-33
ENSOCUG00000016211	SNTB1	2.24884	4.75302	2.23909e-33
ENSOCUG00000033625		4.65905	25.2647	2.5504e-33
ENSOCUG00000013507	NMUR2	-7.88227	0.00423838	3.06299e-33
ENSOCUG00000008996	SLC41A3	1.72057	3.29566	3.64799e-33
ENSOCUG00000003769	MSMO1	2.08335	4.23791	4.36151e-33
ENSOCUG00000033275	MMD2	3.63553	12.4281	4.39837e-33
ENSOCUG00000004549	CYP51A1	1.30556	2.47179	8.08713e-33
ENSOCUG00000000802	WIPF3	1.86876	3.65218	8.43174e-33
ENSOCUG00000005836	NRG1	3.11175	8.64431	1.20343e-32
ENSOCUG00000002433		-3.44533	0.0918022	2.02547e-32
ENSOCUG00000000778	DENND5B	1.29759	2.45818	3.01033e-32
ENSOCUG00000005937	SCD5	-2.08979	0.234916	3.71927e-32
ENSOCUG00000034018		-2.62213	0.162428	3.99277e-32
ENSOCUG00000012115	AXIN2	-1.91954	0.264339	4.41126e-32
ENSOCUG00000023043	TLE3	-1.55876	0.339443	4.42005e-32
ENSOCUG00000029521	ASH2L	1.57267	2.97456	6.66398e-32
ENSOCUG00000002137	UGP2	1.63471	3.10525	9.37e-32
ENSOCUG00000023456		-1.70526	0.306666	1.07028e-31
ENSOCUG00000009395	CNTN1	3.20125	9.19758	1.17014e-31
ENSOCUG00000017082	IGSF11	2.24072	4.72634	1.4208e-31
ENSOCUG00000023010	KLHDC8A	3.58436	11.995	1.63868e-31
ENSOCUG00000001145	GRIP2	-2.84016	0.139645	1.64028e-31
ENSOCUG00000011514	MFAP3L	2.24049	4.72556	1.83302e-31
ENSOCUG00000000815	GPR75	-3.07101	0.118997	2.05662e-31
ENSOCUG00000000108	ARL4A	-2.87533	0.136282	2.51636e-31
ENSOCUG00000012561	SLC43A3	1.66691	3.17534	2.89601e-31
ENSOCUG00000006702	GPR37	4.46094	22.0231	3.26335e-31
ENSOCUG00000003153	TRIB2	1.80643	3.49775	3.96469e-31
ENSOCUG00000016645	LRP8	2.50999	5.69617	4.89819e-31
ENSOCUG00000001920	GPRC5B	1.1545	2.22607	7.42666e-31
ENSOCUG00000005882	WT1	-1.064	0.478303	7.42666e-31
ENSOCUG00000007866	G6PD	1.54703	2.92216	7.45515e-31
ENSOCUG00000002345	CA10	2.669	6.35986	8.37154e-31
ENSOCUG00000002580	CHRNA7	-2.54948	0.170816	1.11921e-30
ENSOCUG00000011843	HSD11B2	-2.49637	0.177222	1.606e-30
ENSOCUG00000009616	CRISPLD1	1.67962	3.20345	2.08622e-30
ENSOCUG00000016632	PDE7B	-2.30805	0.201933	2.21404e-30
ENSOCUG00000006705	GPR156	-1.70157	0.307451	5.80958e-30
ENSOCUG00000009657	SDR16C5	-4.41671	0.0468207	7.27539e-30
ENSOCUG00000008043	ERC2	-2.75104	0.148544	1.28365e-29
ENSOCUG00000029644	ICAM1	4.10094	17.1596	2.52383e-29
ENSOCUG00000000280	TAFA3	-3.87489	0.0681619	2.65369e-29
ENSOCUG00000014317	PIGR	7.4004	168.944	2.86441e-29
ENSOCUG00000024474	LOC100341843	2.40687	5.30321	3.6143e-29
ENSOCUG00000003633	GFRA1	3.29828	9.8374	3.76332e-29
ENSOCUG00000007668	PTK2B	3.76353	13.5811	7.00568e-29
ENSOCUG00000004829	ESR1	-2.81621	0.141983	9.67989e-29
ENSOCUG00000008298	FAXC	-1.98435	0.252727	1.07609e-28
ENSOCUG00000005835	STXBP5L	-3.0534	0.120458	1.07609e-28
ENSOCUG00000030642	SMIM32	-3.40199	0.0946016	1.12064e-28
ENSOCUG00000008204	SOAT1	1.30157	2.46498	1.20966e-28
ENSOCUG00000021234	LOC100346323	-3.78974	0.072306	1.28795e-28
ENSOCUG00000030606	DEFB119	4.22159	18.6563	1.39661e-28
ENSOCUG00000000527	DPYSL4	-3.38705	0.0955866	1.88607e-28
ENSOCUG00000017458	NEB	-2.74878	0.148776	3.07849e-28
ENSOCUG00000000651	LDLR	1.76979	3.41004	4.26579e-28
ENSOCUG00000013062	ACSL6	2.57165	5.94489	4.67456e-28
ENSOCUG00000001655	LIX1	-2.82995	0.140637	5.09224e-28
ENSOCUG00000009839	HDAC11	1.41644	2.66926	6.02802e-28
ENSOCUG00000025190	LRRC58	-2.15854	0.223984	6.99727e-28
ENSOCUG00000017588	KLHDC8B	1.47948	2.78849	9.28639e-28
ENSOCUG00000005824	GLB1	1.5096	2.84731	1.47798e-27
ENSOCUG00000022981	ATP6V1C2	-2.5064	0.175994	1.55227e-27
ENSOCUG00000013725	FAM20A	-2.27835	0.206133	1.61349e-27
ENSOCUG00000008644	LOC100339305	2.24617	4.74423	2.10999e-27
ENSOCUG00000021140		4.31391	19.8892	2.17374e-27
ENSOCUG00000002685	ADCY8	5.07544	33.7179	2.69895e-27
ENSOCUG00000010425	FABP5	-2.07923	0.23664	3.18061e-27
ENSOCUG00000005660	PDGFA	1.7267	3.30969	3.34201e-27
ENSOCUG00000011128	GLI1	3.98679	15.8542	3.73994e-27
ENSOCUG00000014076	DGKB	-2.37765	0.192423	4.8747e-27
ENSOCUG00000002907	CNTNAP4	4.68236	25.6763	5.29604e-27
ENSOCUG00000017667	ATP1A2	-2.10934	0.231753	7.05974e-27
ENSOCUG00000002824	PITPNM3	3.55313	11.7381	1.01119e-26
ENSOCUG00000013287	B4GALT6	-1.90123	0.267716	1.06944e-26
ENSOCUG00000003033	GDNF	5.34231	40.569	1.28114e-26
ENSOCUG00000029602	PNLIP	-5.0345	0.0305116	1.88789e-26
ENSOCUG00000011780	CYFIP2	2.89946	7.46145	2.23955e-26
ENSOCUG00000014466		-2.38519	0.19142	2.63472e-26
ENSOCUG00000024308	MMP11	1.21535	2.32197	3.57357e-26
ENSOCUG00000013017	ELOVL2	1.68804	3.2222	6.85108e-26
ENSOCUG00000002204	IGLON5	-2.68064	0.155972	6.89221e-26
ENSOCUG00000026384	HR	3.19583	9.16304	7.17764e-26
ENSOCUG00000013688	TNFAIP6	3.72219	13.1975	7.4812e-26
ENSOCUG00000004008	CNDP1	-2.0049	0.249152	8.4408e-26
ENSOCUG00000022873	LOC100357183	-2.57815	0.167455	8.67556e-26
ENSOCUG00000009597	CEL	5.94175	61.4675	1.05985e-25
ENSOCUG00000003249	FZD1	2.60965	6.10355	1.19913e-25
ENSOCUG00000000715	CD44	3.21586	9.29118	1.39723e-25
ENSOCUG00000008587	TNFSF4	1.87779	3.67512	1.4438e-25
ENSOCUG00000008140	TTLL7	-1.61422	0.326642	2.34937e-25
ENSOCUG00000004622	PAPSS1	1.10449	2.15022	2.86845e-25
ENSOCUG00000006957	IL1R1	2.41846	5.34602	3.54752e-25
ENSOCUG00000008629	KCNK2	1.68207	3.20889	4.09885e-25
ENSOCUG00000013019	TJP2	-2.01055	0.248178	4.26861e-25
ENSOCUG00000017227	SPATS1	3.79777	13.9073	4.88488e-25
ENSOCUG00000017373	PLEKHA7	3.12954	8.75158	5.14057e-25
ENSOCUG00000016029	IQCD	-2.09879	0.233454	5.29939e-25
ENSOCUG00000010292	EFHC2	-1.80293	0.286592	6.81842e-25
ENSOCUG00000005341	HEXB	1.46896	2.76822	6.81842e-25
ENSOCUG00000022837		-5.6024	0.0205831	6.8604e-25
ENSOCUG00000010773	MRVI1	-2.00239	0.249586	7.81843e-25
ENSOCUG00000014705	NEU2	-4.92197	0.0329868	8.46983e-25
ENSOCUG00000003743	KLHL21	1.25374	2.38459	9.5662e-25
ENSOCUG00000009958	NPY1R	-1.7935	0.288471	9.85014e-25
ENSOCUG00000003720	DUSP4	-2.04776	0.241859	1.06673e-24
ENSOCUG00000010696	NTRK1	-2.79491	0.144095	1.18171e-24
ENSOCUG00000001264	CMYA5	3.83357	14.2567	1.41681e-24
ENSOCUG00000034789		-3.71237	0.0762895	1.46304e-24
ENSOCUG00000013115	C10orf82	3.27667	9.69117	1.65696e-24
ENSOCUG00000012043	CAMKK1	2.07635	4.21738	1.76578e-24
ENSOCUG00000010729	RASL12	3.06845	8.38872	2.61052e-24
ENSOCUG00000024206	KCNJ3	-1.9437	0.259948	2.69947e-24
ENSOCUG00000013801	SHCBP1	-1.50332	0.35274	2.75379e-24
ENSOCUG00000023355	MYO7A	2.80249	6.97644	2.93102e-24
ENSOCUG00000012272	PRRX1	-2.58916	0.166182	3.98778e-24
ENSOCUG00000022383	OSR2	3.29285	9.80048	4.73187e-24
ENSOCUG00000012608	PTGER2	-5.29148	0.0255333	6.20803e-24
ENSOCUG00000014077	LTBP2	2.55439	5.87419	6.21255e-24
ENSOCUG00000007990	OSBPL3	2.15743	4.46119	6.64098e-24
ENSOCUG00000001380		4.41347	21.3102	6.98776e-24
ENSOCUG00000005808	PDLIM3	3.2253	9.35217	7.38259e-24
ENSOCUG00000008597	DDX4	-3.14387	0.113136	1.14841e-23
ENSOCUG00000015755	DENND2D	-2.46129	0.181584	1.27467e-23
ENSOCUG00000024509	LOC100343656	-2.69756	0.154154	1.27467e-23
ENSOCUG00000011227	LHCGR	3.1495	8.87346	1.38589e-23
ENSOCUG00000005839		2.05449	4.15395	1.51866e-23
ENSOCUG00000000934	LRRC4B	1.94375	3.84703	1.54718e-23
ENSOCUG00000004492	KCNQ1	3.06863	8.38975	2.0666e-23
ENSOCUG00000025091	AARD	2.13348	4.38776	2.10897e-23
ENSOCUG00000013504	C15orf39	1.53759	2.90309	2.26618e-23
ENSOCUG00000004294	NKX3-1	3.33028	10.0581	2.82689e-23
ENSOCUG00000025111	GALNT15	-4.03755	0.0608941	3.14168e-23
ENSOCUG00000002112	MYBPC3	2.73586	6.66158	4.26147e-23
ENSOCUG00000003312	ONECUT1	-6.18465	0.0137478	4.27513e-23
ENSOCUG00000016823	COBL	2.00643	4.01786	4.4066e-23
ENSOCUG00000012016	SEMA3D	2.48186	5.58618	4.47752e-23
ENSOCUG00000005740	ARL6IP1	1.19891	2.29566	4.5586e-23
ENSOCUG00000033970		2.01139	4.03172	5.52011e-23
ENSOCUG00000011714	CLPTM1	1.5711	2.97131	6.63321e-23
ENSOCUG00000008068	BCHE	-2.08854	0.235118	7.21051e-23
ENSOCUG00000010458	NECTIN1	-2.0948	0.234101	7.3187e-23
ENSOCUG00000013134	ST8SIA1	1.84085	3.58221	8.40192e-23
ENSOCUG00000002486	COL6A6	2.45998	5.5021	9.02446e-23
ENSOCUG00000009794	HTR1A	-3.32595	0.0997217	1.14211e-22
ENSOCUG00000016883	FERMT1	-2.86344	0.13741	1.18291e-22
ENSOCUG00000013967	MVK	1.49567	2.81995	1.40713e-22
ENSOCUG00000015363	NFASC	2.92808	7.61094	1.68777e-22
ENSOCUG00000010379	FREM1	2.55695	5.88461	1.71456e-22
ENSOCUG00000014561	CDH20	-2.29205	0.204185	1.74769e-22
ENSOCUG00000023226	TTYH1	4.21999	18.6356	1.85192e-22
ENSOCUG00000012367	COL9A1	8.19946	293.957	2.44567e-22
ENSOCUG00000014744	WNT16	-5.98604	0.0157769	2.93513e-22
ENSOCUG00000010300	LGALS12	-2.44854	0.183196	2.95031e-22
ENSOCUG00000011332	PACSIN1	-1.5574	0.339762	3.61976e-22
ENSOCUG00000036869	SMIM41	3.12511	8.72475	4.74721e-22
ENSOCUG00000008754	CAMKV	-2.55335	0.170359	5.82855e-22
ENSOCUG00000016955	TMEM164	1.43404	2.70202	6.13268e-22
ENSOCUG00000032489		-3.42615	0.0930304	8.98538e-22
ENSOCUG00000010891		-1.99123	0.251524	9.62626e-22
ENSOCUG00000027209	ST6GAL1	-1.53189	0.345823	9.66144e-22
ENSOCUG00000008464	PRKG2	-3.52738	0.0867269	1.03112e-21
ENSOCUG00000007427	FAT3	4.46658	22.1093	1.05006e-21
ENSOCUG00000001304	AGAP2	2.31062	4.96098	1.26051e-21
ENSOCUG00000015958	GALNT2	1.21423	2.32016	1.2836e-21
ENSOCUG00000006943	UNC5B	1.77779	3.42901	2.50669e-21
ENSOCUG00000025956	SDC1	-1.59277	0.331534	2.59443e-21
ENSOCUG00000033536	FDPS	1.25494	2.38657	2.88057e-21
ENSOCUG00000012442	TBC1D1	-1.09309	0.468756	2.99116e-21
ENSOCUG00000003087	SLITRK3	-2.33433	0.198288	3.04047e-21
ENSOCUG00000022761	IL3RA	-4.26378	0.0520563	3.04947e-21
ENSOCUG00000017882	ANO3	-4.68319	0.038924	3.58281e-21
ENSOCUG00000001596	B3GALT2	6.95381	123.967	4.52004e-21
ENSOCUG00000016757	EXPH5	3.41707	10.6817	4.94272e-21
ENSOCUG00000012238	NWD2	3.15688	8.91899	5.09043e-21
ENSOCUG00000006519	ABHD1	4.01195	16.1331	5.63605e-21
ENSOCUG00000024485	RAP1GAP	-1.39611	0.379953	5.63605e-21
ENSOCUG00000014409	CCDC15	1.50651	2.84122	8.19229e-21
ENSOCUG00000010012	AK4	-2.2749	0.206627	8.68342e-21
ENSOCUG00000011749	AHCYL2	1.38747	2.61619	1.02312e-20
ENSOCUG00000015565	KCNJ5	-1.57386	0.335909	1.24729e-20
ENSOCUG00000003367	TLR2	-1.58527	0.333263	1.3286e-20
ENSOCUG00000015430	TRIM72	4.1424	17.6598	1.47467e-20
ENSOCUG00000001903	NOS2	-2.34822	0.196389	1.57473e-20
ENSOCUG00000027359	TSPAN11	2.93586	7.65215	1.74465e-20
ENSOCUG00000038584	EFNA4	-1.35819	0.390071	1.8106e-20
ENSOCUG00000001212	JUN	2.06678	4.1895	1.86727e-20
ENSOCUG00000026416	CYP4F2	-2.80139	0.143449	1.87059e-20
ENSOCUG00000024555	KCTD12	1.27912	2.4269	1.88934e-20
ENSOCUG00000010436	LEF1	-1.37467	0.385641	1.95569e-20
ENSOCUG00000014916	SEMA4B	-1.41449	0.375143	1.95931e-20
ENSOCUG00000013363	STIM1	1.10582	2.15221	2.10655e-20
ENSOCUG00000013795	INSIG1	1.84928	3.60319	2.32334e-20
ENSOCUG00000016256	HAND2	1.60971	3.05191	2.86148e-20
ENSOCUG00000010126	ST3GAL5	1.21643	2.3237	2.97416e-20
ENSOCUG00000009404	KIF19	8.36149	328.897	3.11181e-20
ENSOCUG00000006416	NR0B2	3.11958	8.69136	3.14472e-20
ENSOCUG00000016119	SNAP25	-1.40687	0.377129	3.99301e-20
ENSOCUG00000003684	BMERB1	-1.93018	0.262396	4.25271e-20
ENSOCUG00000014421	MPZ	3.92757	15.2166	4.30643e-20
ENSOCUG00000008930	PLPPR4	2.78318	6.88368	4.61273e-20
ENSOCUG00000024481	CAPN3	-2.4405	0.184219	4.65872e-20
ENSOCUG00000012201	PPAT	1.58544	3.001	5.83238e-20
ENSOCUG00000009858	KLHL30	2.63358	6.20562	5.88188e-20
ENSOCUG00000007885	KCNAB1	-1.80154	0.286868	6.22592e-20
ENSOCUG00000009427	LAMA2	3.68744	12.8834	6.57296e-20
ENSOCUG00000012432	HS3ST3B1	1.47838	2.78636	7.08527e-20
DTOCUGWNT4	WNT4	-1.89959	0.26802	7.7485e-20
ENSOCUG00000007599	NR6A1	-2.02948	0.244943	8.64575e-20
ENSOCUG00000006739	NAGA	1.59333	3.01745	9.25497e-20
ENSOCUG00000009228	ENC1	1.38503	2.61178	1.16549e-19
ENSOCUG00000038032	DEFB125	4.24395	18.9476	1.17136e-19
ENSOCUG00000002798	ABHD12	1.31815	2.49347	1.21013e-19
ENSOCUG00000016262	ELAVL4	-2.26982	0.207356	1.21019e-19
ENSOCUG00000014678	KLHL34	-2.96272	0.128272	1.31377e-19
ENSOCUG00000009155	MAP3K1	1.33821	2.52837	1.75562e-19
ENSOCUG00000013498	ADAMTS4	1.8661	3.64545	1.85813e-19
ENSOCUG00000009150	TSKS	1.91594	3.77358	1.99146e-19
ENSOCUG00000014800	PLP1	1.67602	3.19544	2.39279e-19
ENSOCUG00000001436	MAOB	-1.55476	0.340385	2.6472e-19
ENSOCUG00000017423	PCSK6	1.48866	2.80629	3.01275e-19
ENSOCUG00000007042	DCX	-2.59781	0.16519	3.09084e-19
ENSOCUG00000003254	CDKL2	-1.76817	0.29358	3.24645e-19
ENSOCUG00000027792	TMEM52	2.15222	4.44511	3.48581e-19
ENSOCUG00000021847	RMDN2	1.83162	3.55936	3.50645e-19
ENSOCUG00000033927	LOC103350399	-5.83278	0.0175452	4.09909e-19
ENSOCUG00000007053	CYP21A2	3.98354	15.8185	4.21154e-19
ENSOCUG00000029837		1.38138	2.60518	4.85082e-19
ENSOCUG00000017881	MAPK15	-1.86762	0.274025	5.28181e-19
ENSOCUG00000005415	PXMP4	1.2041	2.30394	5.3173e-19
ENSOCUG00000015935	TCF7	-1.83453	0.280382	5.33509e-19
ENSOCUG00000025301	CCDC24	3.16163	8.94841	5.51349e-19
ENSOCUG00000005496	SLC7A9	2.07573	4.21558	5.51349e-19
ENSOCUG00000012521	RADX	-2.2522	0.209904	5.76523e-19
ENSOCUG00000037357	TRIM16	1.70482	3.25987	5.7819e-19
ENSOCUG00000026897		-1.73667	0.300061	5.83414e-19
ENSOCUG00000005826	PCDH10	2.43229	5.39751	5.9471e-19
ENSOCUG00000015995	SLC17A8	4.87094	29.2616	6.44011e-19
ENSOCUG00000023790	ROR1	-2.04254	0.242736	6.57773e-19
ENSOCUG00000002344	SEMA3B	1.17593	2.25939	7.56075e-19
ENSOCUG00000015071	ALDH1L1	2.2329	4.70078	7.60306e-19
ENSOCUG00000002998	PKDCC	1.59324	3.01725	7.88874e-19
ENSOCUG00000009825	BPHL	-1.38666	0.382449	8.79947e-19
ENSOCUG00000015838	COL9A2	2.24172	4.72962	8.96236e-19
ENSOCUG00000006753	OPTC	3.03862	8.21703	9.80093e-19
ENSOCUG00000010456	RASGEF1B	-1.10704	0.464246	1.09012e-18
ENSOCUG00000025680	LRRC75A	1.77603	3.42483	1.48549e-18
ENSOCUG00000013920	KRT80	3.29526	9.81685	1.52795e-18
ENSOCUG00000016829	GPX6	-2.35245	0.195813	1.60015e-18
ENSOCUG00000008267	CYP4X1	1.75843	3.38329	1.69125e-18
ENSOCUG00000026770	FJX1	2.40758	5.30583	1.83246e-18
ENSOCUG00000006719	LPCAT2	1.86709	3.64796	2.29441e-18
ENSOCUG00000014352	GATM	1.64149	3.11988	2.46932e-18
ENSOCUG00000007237	HSD17B11	1.47641	2.78256	2.46932e-18
ENSOCUG00000012088	EMX2	-1.95389	0.25812	2.50611e-18
ENSOCUG00000033613	PON3	-2.56861	0.168566	3.45755e-18
ENSOCUG00000027106	HAS2	2.38526	5.22437	3.99622e-18
ENSOCUG00000011017	ADORA1	-1.86187	0.27512	4.69934e-18
ENSOCUG00000006264		-2.18417	0.220038	5.46903e-18
ENSOCUG00000013457	CCKAR	-3.46258	0.090711	5.58279e-18
ENSOCUG00000001405	ABTB2	1.87578	3.66999	5.58532e-18
ENSOCUG00000012419	KCNJ6	-5.2586	0.0261218	6.1552e-18
ENSOCUG00000007504	VSTM4	2.40249	5.28714	6.25666e-18
ENSOCUG00000022248	RUFY4	-3.88898	0.0674993	6.38412e-18
ENSOCUG00000008620	DAPL1	2.00475	4.01319	6.85913e-18
ENSOCUG00000013429	NHSL1	1.50053	2.82947	6.96221e-18
ENSOCUG00000009850	NPC1	1.62569	3.0859	7.48738e-18
ENSOCUG00000012458	FUT9	-3.411	0.0940129	7.83885e-18
ENSOCUG00000033346		-3.33171	0.0993243	7.99833e-18
ENSOCUG00000016118	TSPYL4	-1.02017	0.493059	8.24923e-18
ENSOCUG00000016069	RNF144A	1.09895	2.14199	8.62361e-18
ENSOCUG00000008691	B3GNT5	-1.40773	0.376905	9.30771e-18
ENSOCUG00000005293	DYNC2LI1	-1.77928	0.291328	1.16661e-17
ENSOCUG00000013760	NEURL1	2.96076	7.78536	1.24235e-17
ENSOCUG00000003963	BCAT1	2.58109	5.98393	1.25997e-17
ENSOCUG00000009360	MST1R	-3.24186	0.105707	1.26955e-17
ENSOCUG00000006579	SPHK1	3.63619	12.4338	1.43352e-17
ENSOCUG00000024443	LOC100356307	1.3803	2.60322	1.53965e-17
ENSOCUG00000027853	PGAM2	1.78474	3.44556	1.60069e-17
ENSOCUG00000011096	MGAT5	1.9111	3.76096	1.71231e-17
ENSOCUG00000016688	MTM1	1.04866	2.06861	1.82647e-17
ENSOCUG00000015211	ATP8A2	2.40025	5.27896	1.97095e-17
ENSOCUG00000026022	DERL3	3.4757	11.1247	2.28312e-17
ENSOCUG00000010111	P4HA3	-1.63754	0.321403	2.43879e-17
ENSOCUG00000016311	GLS2	2.37656	5.19296	2.53887e-17
ENSOCUG00000001085	ALK	4.18139	18.1436	2.77977e-17
ENSOCUG00000014548	EVPL	-2.41298	0.187768	2.85478e-17
ENSOCUG00000010392	DPEP1	2.78143	6.87534	3.23379e-17
ENSOCUG00000000832	ABHD6	1.13596	2.19765	3.35876e-17
ENSOCUG00000029657	SERPINA9	-5.1218	0.0287201	3.63139e-17
ENSOCUG00000030403	TRAIP	-4.98397	0.0315992	3.71441e-17
ENSOCUG00000008746	TRAIP	-1.53125	0.345977	3.71441e-17
ENSOCUG00000029756	SIAH3	-1.74942	0.297422	4.19574e-17
ENSOCUG00000007899	NSDHL	1.31796	2.49313	4.3119e-17
ENSOCUG00000034003		3.08086	8.46121	4.68588e-17
ENSOCUG00000003773	DTNA	1.78398	3.44374	4.93743e-17
ENSOCUG00000007332	WDR66	-1.52473	0.347545	5.01959e-17
ENSOCUG00000007886	CYRIA	1.5061	2.84041	5.15023e-17
ENSOCUG00000011339	SC5D	1.03682	2.05171	5.15023e-17
ENSOCUG00000004511	HSPB8	2.57187	5.9458	5.3901e-17
ENSOCUG00000024229	SOWAHD	-2.35326	0.195703	6.14758e-17
ENSOCUG00000013125	ACSS1	1.71973	3.29374	7.27554e-17
ENSOCUG00000009777	GAREM2	-2.31828	0.200506	7.33723e-17
ENSOCUG00000028983	U2	-3.633	0.0806044	7.56082e-17
ENSOCUG00000001864	AQP8	2.46414	5.51799	7.56836e-17
ENSOCUG00000009724	FAIM	-1.5054	0.352231	7.7056e-17
ENSOCUG00000025973	POPDC3	3.17628	9.03975	7.88321e-17
ENSOCUG00000029817		-2.39227	0.190482	7.93954e-17
ENSOCUG00000011330	SKAP2	1.74005	3.34048	8.00571e-17
ENSOCUG00000011944	ENPP6	2.82599	7.09101	9.39394e-17
ENSOCUG00000025219	OAF	1.79891	3.47956	9.46824e-17
ENSOCUG00000021996	CDC42EP1	1.47241	2.77485	9.59786e-17
ENSOCUG00000015032	RAPGEF4	2.27747	4.84826	1.12546e-16
ENSOCUG00000007472		2.64552	6.2572	1.13969e-16
ENSOCUG00000012747	PRKAR2B	1.56881	2.96659	1.17681e-16
ENSOCUG00000035654	AOX3	1.60798	3.04826	1.68087e-16
ENSOCUG00000013280	ARHGEF3	1.84761	3.59903	1.71035e-16
ENSOCUG00000015550	ASTN1	-2.48653	0.178435	1.71035e-16
ENSOCUG00000013668	PLPPR1	-1.81078	0.285037	1.71052e-16
ENSOCUG00000037644	PRCD	1.69297	3.23321	1.72246e-16
ENSOCUG00000008102	MTSS1	-1.40631	0.377275	1.79919e-16
ENSOCUG00000007901	SEMA6D	1.98263	3.95214	1.8371e-16
ENSOCUG00000001660	VWCE	-2.13811	0.227178	1.86605e-16
ENSOCUG00000007014	SH3D19	1.52401	2.8759	2.62253e-16
ENSOCUG00000008355	ARSA	1.20461	2.30474	2.66105e-16
ENSOCUG00000014794	ATP2A3	2.75444	6.74791	2.7299e-16
ENSOCUG00000004197		-2.4803	0.179207	2.94225e-16
ENSOCUG00000031765		-4.33225	0.0496435	3.19692e-16
ENSOCUG00000005614	TTC9	1.50646	2.84112	3.383e-16
ENSOCUG00000038015		-2.07939	0.236615	3.42366e-16
ENSOCUG00000010987	TMEM26	1.6696	3.18127	3.64726e-16
ENSOCUG00000013544	ATP6V0A4	-2.67578	0.156498	3.84902e-16
ENSOCUG00000026994	TUBA4A	-2.69338	0.154601	3.86307e-16
ENSOCUG00000015292	NEDD9	1.82176	3.53512	3.96969e-16
ENSOCUG00000016314	TMEM119	2.60776	6.09557	4.09398e-16
ENSOCUG00000000560	HEYL	1.98734	3.96506	4.77921e-16
ENSOCUG00000014585	ZDHHC2	5.22948	37.5173	4.95262e-16
ENSOCUG00000008954	GADD45A	2.05397	4.15248	5.77779e-16
ENSOCUG00000009149	ECHDC3	1.68378	3.21269	5.96096e-16
ENSOCUG00000004035	IRF6	-1.71236	0.30516	6.38072e-16
ENSOCUG00000002037	PTPN21	1.08654	2.12365	6.50667e-16
ENSOCUG00000025780	CCL25	2.51585	5.71934	6.75017e-16
ENSOCUG00000010145	VAMP2	1.37567	2.59488	8.11535e-16
ENSOCUG00000008497	TOX2	2.20821	4.62101	8.45423e-16
ENSOCUG00000010134	ITPRID2	1.77672	3.42645	1.02227e-15
ENSOCUG00000001765	DKK2	1.8886	3.70277	1.02598e-15
ENSOCUG00000016171	CDH23	3.06423	8.36424	1.07747e-15
ENSOCUG00000015162	MFAP4	1.41464	2.66592	1.2294e-15
ENSOCUG00000014902	UPP1	-1.82034	0.283154	1.38111e-15
ENSOCUG00000012937	PRKACB	-1.18304	0.440421	1.41935e-15
ENSOCUG00000013072	UBASH3B	1.59106	3.01271	1.56649e-15
ENSOCUG00000005927	ACSM5	-3.29361	0.101982	1.69621e-15
ENSOCUG00000027943	C19orf38	2.3098	4.95813	1.73401e-15
ENSOCUG00000016660	SFRP2	-2.19314	0.218675	1.76574e-15
ENSOCUG00000021812	LOC100340803	1.00779	2.01083	2.01674e-15
ENSOCUG00000021297	TRIM29	-2.87032	0.136756	2.21229e-15
ENSOCUG00000001968		2.77631	6.85098	2.43345e-15
ENSOCUG00000014482	PLXDC2	2.39014	5.24209	2.45695e-15
ENSOCUG00000037331		3.18283	9.08086	2.54269e-15
ENSOCUG00000013003	SCN3A	3.87818	14.7045	2.89405e-15
ENSOCUG00000010825	EPB41L4A	-1.92458	0.263418	3.39695e-15
ENSOCUG00000017601	CDH19	1.94054	3.83851	3.77219e-15
ENSOCUG00000022857	EFNB2	-1.1372	0.454642	3.8056e-15
ENSOCUG00000010728	APOA1	-1.84305	0.278733	3.86372e-15
ENSOCUG00000013309	TRHDE	1.64211	3.12123	3.87418e-15
ENSOCUG00000016945	ITIH5	1.31073	2.48067	4.02929e-15
ENSOCUG00000027810	ZFAND4	-1.84394	0.27856	4.06535e-15
ENSOCUG00000004791	PCED1B	1.65078	3.14004	4.08607e-15
ENSOCUG00000027014	MFRP	8.89853	477.227	4.71772e-15
ENSOCUG00000014946	RASD1	-2.73233	0.150482	4.75008e-15
ENSOCUG00000024536	SPTSSB	-2.78346	0.145243	4.84368e-15
ENSOCUG00000026004	SLC43A1	-1.32218	0.399929	5.05995e-15
ENSOCUG00000001375	SCD	-1.42138	0.373355	5.10463e-15
ENSOCUG00000025825		3.46989	11.08	5.13115e-15
ENSOCUG00000013238	ELF4	1.35758	2.56255	5.60396e-15
ENSOCUG00000016659	EMB	4.95406	30.9971	5.65312e-15
ENSOCUG00000015208	MB21D2	1.25101	2.38009	6.1643e-15
ENSOCUG00000015335	SLC35C1	1.05104	2.07202	6.29695e-15
ENSOCUG00000001030	GEM	-1.72166	0.303199	6.87241e-15
ENSOCUG00000007001	CPA1	-6.71528	0.00951699	6.96821e-15
ENSOCUG00000000371	TTC38	1.31601	2.48977	7.13433e-15
ENSOCUG00000001035	ADAMTS2	1.73556	3.33009	7.22885e-15
ENSOCUG00000011278	SCHIP1	-1.36011	0.389553	7.26742e-15
ENSOCUG00000011091	GALNT10	1.8166	3.52251	7.93823e-15
ENSOCUG00000022473		-2.14462	0.226155	8.29514e-15
ENSOCUG00000038381		3.52163	11.4846	9.20901e-15
ENSOCUG00000001539	PHYHIPL	-2.77824	0.145769	9.83897e-15
ENSOCUG00000000566	XPR1	1.12524	2.18138	1.1286e-14
ENSOCUG00000001555	ACE	3.74862	13.4415	1.19503e-14
ENSOCUG00000004459	KCNA1	10.0394	1052.34	1.19698e-14
ENSOCUG00000012786	TMEM47	1.89701	3.72441	1.20551e-14
ENSOCUG00000012005	ME3	1.56073	2.95003	1.23638e-14
ENSOCUG00000015248	SHISA2	-3.02362	0.12297	1.29904e-14
ENSOCUG00000001386	CTTNBP2	-1.75209	0.296871	1.31118e-14
ENSOCUG00000016815	ICA1	-1.65561	0.317403	1.32039e-14
ENSOCUG00000030225		3.54793	11.6959	1.53853e-14
ENSOCUG00000002822	EFNB3	-1.18713	0.439176	1.57159e-14
ENSOCUG00000014953	SYNE3	2.63667	6.21893	1.61222e-14
ENSOCUG00000012034	RBM47	2.24039	4.72526	1.68285e-14
ENSOCUG00000015778	SLC25A47	-2.11678	0.230561	1.72417e-14
ENSOCUG00000001938	LSS	1.28007	2.42851	1.97007e-14
ENSOCUG00000017272	COBLL1	1.63563	3.10724	2.10606e-14
ENSOCUG00000022848	SNX33	1.20182	2.3003	2.10606e-14
ENSOCUG00000009837	RMC1	1.17462	2.25734	2.18174e-14
ENSOCUG00000002057	AHSG	5.10515	34.4193	2.29405e-14
ENSOCUG00000011353	INHA	1.66667	3.17481	2.39847e-14
ENSOCUG00000014622	AKR7A3	2.30419	4.9389	2.42529e-14
ENSOCUG00000010167	AVPR1A	4.78445	27.5589	2.4386e-14
ENSOCUG00000004110	FITM2	1.00502	2.00697	2.477e-14
ENSOCUG00000002000	SGCD	2.8979	7.45341	2.91468e-14
ENSOCUG00000010677	INSRR	-3.61257	0.0817537	2.96197e-14
ENSOCUG00000008178	PNLIPRP1	-5.2611	0.0260767	3.02997e-14
ENSOCUG00000004773	MACROH2A2	-1.02019	0.493052	3.21327e-14
ENSOCUG00000027865	CYP11A1	1.92697	3.80257	3.26057e-14
ENSOCUG00000006562	LANCL3	-1.67114	0.314005	3.36162e-14
ENSOCUG00000004569	ANXA11	1.09696	2.13903	3.49007e-14
ENSOCUG00000015536	CXXC4	1.86173	3.63444	3.50825e-14
ENSOCUG00000038568		1.52623	2.88032	3.82883e-14
ENSOCUG00000038633		8.61934	393.261	3.82883e-14
ENSOCUG00000024996	CLIC6	-2.65297	0.158992	3.86034e-14
ENSOCUG00000011476	FAIM2	-1.44854	0.366391	3.96078e-14
ENSOCUG00000009967	PLAT	1.80277	3.48889	4.17372e-14
ENSOCUG00000001373	BRINP1	-1.46091	0.363264	4.46059e-14
ENSOCUG00000011941	HVCN1	1.66072	3.16175	4.65477e-14
ENSOCUG00000012806	RGS14	2.11087	4.31952	4.66286e-14
ENSOCUG00000015054	UNC5C	2.38683	5.23008	5.67613e-14
ENSOCUG00000012659	TUFT1	-1.32725	0.398527	6.32734e-14
ENSOCUG00000004177	ZSWIM5	1.04994	2.07044	6.71116e-14
ENSOCUG00000000875	FAM124A	2.07411	4.21085	6.98784e-14
ENSOCUG00000004476	DDX25	-1.04671	0.484072	7.92273e-14
ENSOCUG00000015376	S1PR3	-1.23086	0.426062	8.14314e-14
ENSOCUG00000010747	ZNF385A	-1.35254	0.391601	8.32885e-14
ENSOCUG00000017109	TTC39C	1.05308	2.07495	8.77633e-14
ENSOCUG00000015771	SQLE	1.24308	2.36704	8.83309e-14
ENSOCUG00000007900	RCOR2	-1.33219	0.397165	9.04955e-14
ENSOCUG00000032007	SLITRK4	1.17687	2.26086	9.93204e-14
ENSOCUG00000009653	SLITRK4	-1.91429	0.265302	9.93204e-14
ENSOCUG00000001018		-5.06259	0.0299232	1.0375e-13
ENSOCUG00000014105	GABRG1	-2.24385	0.211123	1.05257e-13
ENSOCUG00000007555	PGLYRP2	2.44123	5.43106	1.10432e-13
ENSOCUG00000002671	IDH1	1.22204	2.33276	1.14659e-13
ENSOCUG00000031211		3.63738	12.444	1.34284e-13
ENSOCUG00000007772	TMC3	-5.22894	0.0266645	1.37628e-13
ENSOCUG00000024756	NUDT11	1.8437	3.58928	1.45363e-13
ENSOCUG00000006316	PLEKHO1	1.32642	2.5078	1.46953e-13
ENSOCUG00000022327	CEP70	-1.49028	0.355942	1.52487e-13
ENSOCUG00000004461	CDH9	-5.87417	0.0170489	1.91328e-13
ENSOCUG00000017587	LRRC4C	1.61177	3.05626	1.97283e-13
ENSOCUG00000009208	ACVR1C	-2.56724	0.168726	2.04236e-13
ENSOCUG00000029183	UBAP1L	2.39584	5.26282	2.16156e-13
ENSOCUG00000004222	SLC22A3	1.55505	2.93844	2.22327e-13
ENSOCUG00000010266	MYO3B	-2.83538	0.140109	2.59676e-13
ENSOCUG00000025123	GCNT4	3.06168	8.34945	2.73455e-13
ENSOCUG00000029637	OASL	-1.44068	0.368393	3.49577e-13
ENSOCUG00000004645	WHRN	1.20438	2.30438	3.53174e-13
ENSOCUG00000006833	DNAH12	-2.65493	0.158776	3.57543e-13
ENSOCUG00000017905	PCK1	-5.98588	0.0157787	3.64484e-13
ENSOCUG00000000960	SDK2	1.76525	3.39934	3.69413e-13
ENSOCUG00000002399	PNCK	3.26299	9.5997	3.96361e-13
ENSOCUG00000009788	WDR49	-2.84226	0.139442	4.21488e-13
ENSOCUG00000004261	SLC35G1	1.352	2.55266	4.7218e-13
ENSOCUG00000016585	SH2D4A	-1.89387	0.269084	4.84949e-13
ENSOCUG00000016573	CPVL	-1.74369	0.298606	4.91289e-13
ENSOCUG00000022810	USP51	1.2159	2.32286	4.99233e-13
ENSOCUG00000017504	SYT9	1.69771	3.24385	5.06902e-13
ENSOCUG00000008197	PCDH8	-3.67734	0.0781647	5.66441e-13
ENSOCUG00000027689	ASIC3	-3.72737	0.0755005	6.13483e-13
ENSOCUG00000012993	PCGF5	-1.12767	0.457655	6.15477e-13
ENSOCUG00000010435	SUSD1	1.44213	2.71722	6.42559e-13
ENSOCUG00000011124	FGF18	-1.83969	0.279382	6.48806e-13
ENSOCUG00000017382	MAGI3	1.18789	2.27819	6.54665e-13
ENSOCUG00000001205	RBFOX1	-2.65896	0.158333	6.55062e-13
ENSOCUG00000007358	STK26	-1.18108	0.441022	6.78989e-13
ENSOCUG00000012761	LY75	-2.92867	0.131336	7.26095e-13
ENSOCUG00000015168	PLB1	-1.99154	0.25147	7.40344e-13
ENSOCUG00000008341	ADHFE1	1.22238	2.33331	7.43012e-13
ENSOCUG00000014920	SPRY1	1.577	2.98348	7.60762e-13
ENSOCUG00000029143	DSC3	2.95588	7.75906	7.87122e-13
ENSOCUG00000011037	MYH7	2.76291	6.78764	8.26014e-13
ENSOCUG00000013948	ARHGAP20	1.51356	2.85515	8.60639e-13
ENSOCUG00000012033	OC90	2.92339	7.58625	9.42836e-13
ENSOCUG00000007344	DSE	-1.27896	0.412093	9.6738e-13
ENSOCUG00000004165	IRF1	-1.12945	0.45709	9.69431e-13
ENSOCUG00000006723	EPHA4	2.48325	5.59155	1.018e-12
ENSOCUG00000008121	RASL11A	2.07469	4.21254	1.02146e-12
ENSOCUG00000014258		-2.72796	0.15094	1.05679e-12
ENSOCUG00000035685	PLK2	-2.0509	0.241334	1.06676e-12
ENSOCUG00000007089	PLK2	1.11069	2.15948	1.06676e-12
ENSOCUG00000026941	MEOX2	-2.26565	0.207955	1.0699e-12
ENSOCUG00000005512	RXRG	-2.12279	0.229602	1.10993e-12
ENSOCUG00000004278	ROBO2	2.50246	5.6665	1.1838e-12
ENSOCUG00000009515	POPDC2	-2.78705	0.144882	1.28459e-12
ENSOCUG00000005900	FBLN2	1.89661	3.72336	1.35986e-12
ENSOCUG00000003511	GPR85	-1.12554	0.458331	1.35986e-12
ENSOCUG00000029070	ZNF385D	1.32731	2.50935	1.40897e-12
ENSOCUG00000011415	TGFB3	2.62643	6.17497	1.41022e-12
ENSOCUG00000029611	IL7	4.9597	31.1186	1.4194e-12
ENSOCUG00000015037	UGT8	2.11198	4.32284	1.42558e-12
ENSOCUG00000023987	ETFBKMT	-1.57942	0.334616	1.61555e-12
ENSOCUG00000009790	ERBB4	2.40756	5.30577	1.67471e-12
ENSOCUG00000002805	AMPD3	-1.82466	0.282307	1.7172e-12
ENSOCUG00000010918		1.66043	3.16111	1.88181e-12
ENSOCUG00000022368	CCDC92	-1.68407	0.311204	1.99172e-12
ENSOCUG00000008500	GRIA2	-2.40451	0.188873	2.05296e-12
ENSOCUG00000005991	ALPK3	2.19795	4.58826	2.06265e-12
ENSOCUG00000022288	EDARADD	-1.74532	0.298267	2.12509e-12
ENSOCUG00000009954	CHST4	-2.267	0.207761	2.13084e-12
ENSOCUG00000002537	ROBO1	1.57045	2.96998	2.3043e-12
ENSOCUG00000002296	MYZAP	2.45346	5.47729	2.49989e-12
ENSOCUG00000022273		-3.01201	0.123964	2.59322e-12
ENSOCUG00000029623	ATP2B3	-1.52163	0.348293	2.77155e-12
ENSOCUG00000004825	DRD1	-2.07641	0.237104	2.77155e-12
ENSOCUG00000001734	LARGE1	-1.00254	0.49912	2.79668e-12
ENSOCUG00000025314	GABRA4	-1.61178	0.327195	2.83593e-12
ENSOCUG00000004978	CRTAC1	-2.20833	0.216385	2.83717e-12
ENSOCUG00000014914	AEBP1	1.71283	3.27803	2.86641e-12
ENSOCUG00000006167		8.73079	424.843	3.16504e-12
ENSOCUG00000003973	IFT57	-1.38759	0.382203	3.48194e-12
ENSOCUG00000014499	CLSTN3	-1.45883	0.363787	3.57443e-12
ENSOCUG00000033265	C4orf54	-1.74199	0.298956	3.59087e-12
ENSOCUG00000012713	FGF13	-1.84954	0.277482	4.1619e-12
ENSOCUG00000024112	LGALS3BP	1.23374	2.35176	4.33024e-12
ENSOCUG00000023110		2.1534	4.44874	4.33537e-12
ENSOCUG00000008261	NXT2	1.32149	2.49924	4.37552e-12
ENSOCUG00000004957	GALNT3	-1.6261	0.323963	4.45013e-12
ENSOCUG00000001519	RTN4RL1	1.6445	3.12639	4.46785e-12
ENSOCUG00000002510	SNCB	4.48845	22.447	4.47307e-12
ENSOCUG00000010579	ABAT	1.04765	2.06716	4.60825e-12
ENSOCUG00000024309	SMAD7	1.66103	3.16241	4.86014e-12
ENSOCUG00000022009	HSD17B1	-1.82451	0.282336	4.88024e-12
ENSOCUG00000026354	PGF	2.82952	7.10837	4.90517e-12
ENSOCUG00000014610	ABCC4	-1.37999	0.384221	5.02248e-12
ENSOCUG00000003426	WSCD1	1.8434	3.58856	5.19406e-12
ENSOCUG00000031504		-2.0997	0.233307	5.64686e-12
ENSOCUG00000017726	ITGA11	-2.37266	0.193089	5.67309e-12
ENSOCUG00000011665	ARHGAP26	-1.44618	0.366992	5.86643e-12
ENSOCUG00000022422	COLCA2	-2.48306	0.178864	6.12793e-12
ENSOCUG00000003829	EZR	1.56521	2.95921	6.13012e-12
ENSOCUG00000011878	SLC35F2	1.54564	2.91933	6.33668e-12
ENSOCUG00000001439	FAT1	1.55011	2.92839	7.32797e-12
ENSOCUG00000004694	MINDY1	1.26668	2.40607	7.58466e-12
ENSOCUG00000002470	KLF6	1.46775	2.7659	8.20585e-12
ENSOCUG00000006273	ASPHD2	-2.44124	0.184126	8.43691e-12
ENSOCUG00000004633	PTGER3	1.86002	3.63014	8.54299e-12
ENSOCUG00000005358	ACOT12	-5.35096	0.024502	9.13978e-12
ENSOCUG00000009797	ABCA4	-2.06972	0.238205	9.24734e-12
ENSOCUG00000016822	PDCD4	-1.22712	0.427169	9.44896e-12
ENSOCUG00000015752	ACSS3	1.04735	2.06673	9.46928e-12
ENSOCUG00000012067	SOX10	4.00916	16.1019	9.63199e-12
ENSOCUG00000005827		1.60745	3.04713	1.00401e-11
ENSOCUG00000016402	CARMIL3	-1.84519	0.278319	1.00401e-11
ENSOCUG00000009998	SGMS2	2.3019	4.93106	1.00621e-11
ENSOCUG00000010534	DLG2	1.84029	3.58083	1.0121e-11
ENSOCUG00000026390	TRIM77	3.42123	10.7126	1.0121e-11
ENSOCUG00000002744	HS3ST5	-3.40898	0.0941446	1.02461e-11
ENSOCUG00000005722	CERS6	-1.63463	0.322053	1.0368e-11
ENSOCUG00000004513	DACH2	-2.16402	0.223133	1.06087e-11
ENSOCUG00000028985	DEFB116	5.10695	34.4624	1.07645e-11
ENSOCUG00000009467	CFAP91	-1.50936	0.351267	1.1103e-11
ENSOCUG00000037671		1.17595	2.25942	1.25174e-11
ENSOCUG00000006539	ATP2B4	1.64679	3.13135	1.26499e-11
ENSOCUG00000010306	ENTPD3	-2.13648	0.227434	1.39786e-11
ENSOCUG00000003431	BMP6	1.78546	3.44729	1.41621e-11
ENSOCUG00000002706	MYCBPAP	-1.36614	0.387928	1.46609e-11
ENSOCUG00000035533		-2.99745	0.125221	1.48997e-11
ENSOCUG00000001337	PARM1	-1.2911	0.40864	1.48997e-11
ENSOCUG00000007642	DEPTOR	1.85729	3.62327	1.51413e-11
ENSOCUG00000007635	NGFR	2.56946	5.93587	1.56906e-11
ENSOCUG00000003810	NYAP1	1.65885	3.15764	1.60227e-11
ENSOCUG00000013806	SORT1	1.5144	2.85679	1.67401e-11
ENSOCUG00000008183	HS6ST2	-1.00154	0.499465	1.79647e-11
ENSOCUG00000009279	ABCA1	1.57998	2.98965	1.87492e-11
ENSOCUG00000015665	NTN4	2.96752	7.82193	1.8844e-11
ENSOCUG00000009718	STOX2	2.21583	4.64548	1.91193e-11
ENSOCUG00000010383	CD68	1.94095	3.8396	1.95094e-11
ENSOCUG00000002251	RCSD1	1.26271	2.39946	2.00203e-11
ENSOCUG00000006860	GLDN	-2.09891	0.233435	2.10617e-11
ENSOCUG00000006069	DMRTA1	-3.60946	0.0819301	2.15801e-11
ENSOCUG00000021327	STARD10	-1.62297	0.324666	2.1857e-11
ENSOCUG00000001725	PDGFRB	1.93325	3.81914	2.48197e-11
ENSOCUG00000006637	SLC23A2	-1.49013	0.35598	2.54214e-11
ENSOCUG00000009838	FIGN	1.69543	3.23874	2.5908e-11
ENSOCUG00000005524	TMBIM1	2.61571	6.12925	2.70719e-11
ENSOCUG00000017559	DENND11	-1.67332	0.313532	2.70719e-11
ENSOCUG00000014910	TIPARP	-1.27726	0.412577	2.73958e-11
ENSOCUG00000007190	CYGB	1.3643	2.57451	2.84316e-11
ENSOCUG00000013771	UNC119	1.10704	2.15403	2.86613e-11
ENSOCUG00000007043	TAOK3	1.25972	2.39449	3.13053e-11
ENSOCUG00000001525	ADAMTS6	-1.41762	0.37433	3.33284e-11
ENSOCUG00000022282	EDA2R	1.33851	2.5289	3.52369e-11
ENSOCUG00000007262	BEND6	2.12263	4.35487	3.66959e-11
ENSOCUG00000002185	CHRNA4	-2.80764	0.142829	3.66959e-11
ENSOCUG00000007916	GCNT1	-1.50892	0.351373	3.68467e-11
ENSOCUG00000016995	RPE	-1.05958	0.47977	3.70913e-11
ENSOCUG00000013992	TSPAN15	-1.78465	0.290246	3.72505e-11
ENSOCUG00000010338	CARD19	1.18816	2.27861	3.79208e-11
ENSOCUG00000002587	TSHZ2	2.24326	4.73464	3.94273e-11
ENSOCUG00000002260	ACSS2	1.23054	2.34655	4.09659e-11
ENSOCUG00000011739	RUNX2	-1.3415	0.394609	4.10704e-11
ENSOCUG00000017547	CACNA1E	-1.91656	0.264885	4.28675e-11
ENSOCUG00000002973	PTCH1	2.16103	4.47233	4.3296e-11
ENSOCUG00000007359	GRM3	2.25357	4.76863	4.3401e-11
ENSOCUG00000023350		1.38764	2.61651	4.34487e-11
ENSOCUG00000007833	DLX3	-2.53689	0.172313	4.34773e-11
ENSOCUG00000006048	MICAL1	1.26726	2.40704	4.39168e-11
ENSOCUG00000009070	SEMA3C	1.05173	2.07301	4.57543e-11
ENSOCUG00000014066	SLC6A15	-1.83211	0.280853	4.6299e-11
ENSOCUG00000024789	LPAR3	2.09005	4.25762	4.74265e-11
ENSOCUG00000002896		-2.20128	0.217445	4.96499e-11
ENSOCUG00000008417	SLC25A29	-1.25069	0.420248	5.06853e-11
ENSOCUG00000006438	SHC4	2.01818	4.05073	5.08412e-11
ENSOCUG00000016266	BID	-1.39625	0.379916	5.12331e-11
ENSOCUG00000017019	CDH11	2.26634	4.81102	5.35331e-11
ENSOCUG00000014454	PARP8	1.21776	2.32585	5.47571e-11
ENSOCUG00000027759	LOC100356569	1.64527	3.12806	5.64228e-11
ENSOCUG00000028187	SLC41A1	1.57134	2.97181	5.67257e-11
ENSOCUG00000014646	FEZ1	-1.29125	0.408597	6.09132e-11
ENSOCUG00000029019	FZD8	2.5136	5.71042	6.38176e-11
ENSOCUG00000001177	IL10RB	1.47645	2.78263	6.53489e-11
ENSOCUG00000023702		1.10334	2.14852	7.00093e-11
ENSOCUG00000023854	LOC100356924	2.22193	4.66518	7.10344e-11
ENSOCUG00000006290	LRFN5	-3.03186	0.12227	7.3038e-11
ENSOCUG00000016527	GABBR2	1.87638	3.67152	7.68362e-11
ENSOCUG00000007786	LOC100342240	1.62839	3.09169	7.98629e-11
ENSOCUG00000001913	LDHD	1.13624	2.19807	8.03316e-11
ENSOCUG00000008182	CCDC136	1.50102	2.83043	8.10115e-11
ENSOCUG00000016003	KCNK1	-1.63088	0.322891	8.14503e-11
ENSOCUG00000011186	SRPX2	1.50223	2.83279	8.21081e-11
ENSOCUG00000036497		1.64358	3.12441	8.79525e-11
ENSOCUG00000000597	RAD51B	-1.00715	0.49753	8.90177e-11
ENSOCUG00000004939	ATP2B2	-2.55726	0.169897	9.04257e-11
ENSOCUG00000001980		-3.5269	0.0867554	9.25167e-11
ENSOCUG00000027880	ZEB2	2.0393	4.11046	9.25167e-11
ENSOCUG00000015559	DRC1	-1.55818	0.339579	9.39525e-11
ENSOCUG00000013644	RPE65	4.14425	17.6825	9.62283e-11
ENSOCUG00000014725	SLC22A24	-4.87975	0.0339663	9.73406e-11
ENSOCUG00000026260	SLC6A8	1.57419	2.97767	9.96492e-11
ENSOCUG00000005010	ACSL4	1.21919	2.32816	1.12956e-10
ENSOCUG00000004532	THRB	3.675	12.7727	1.16067e-10
ENSOCUG00000029073	STUM	2.13643	4.39674	1.21071e-10
ENSOCUG00000026658	ADAMTS10	-1.0593	0.479863	1.21071e-10
ENSOCUG00000022007	ISLR	1.52354	2.87496	1.23488e-10
ENSOCUG00000012229	DLGAP3	1.40889	2.65533	1.23999e-10
ENSOCUG00000005985	CLU	1.47738	2.78442	1.30915e-10
ENSOCUG00000036274		1.73786	3.33541	1.36048e-10
ENSOCUG00000008496	GHR	1.62939	3.09382	1.37669e-10
ENSOCUG00000032359		8.94387	492.464	1.37693e-10
ENSOCUG00000013333	HS3ST3A1	2.37981	5.20469	1.41445e-10
ENSOCUG00000014829	SYT1	4.98053	31.5711	1.52612e-10
ENSOCUG00000012086	SLC22A16	-1.96869	0.255485	1.53416e-10
ENSOCUG00000010749	PLEKHG4B	-2.27396	0.206762	1.62784e-10
ENSOCUG00000015247	ZDHHC14	-1.26046	0.417411	1.67564e-10
ENSOCUG00000005507	GNA14	1.4477	2.72773	1.71924e-10
ENSOCUG00000011627	HRH2	-1.94937	0.258929	1.72841e-10
ENSOCUG00000009736	NTRK2	-2.97596	0.1271	1.73728e-10
ENSOCUG00000014161	ABCC8	-3.60044	0.0824438	1.75616e-10
ENSOCUG00000003761	PHF11	-1.26524	0.416029	1.76998e-10
ENSOCUG00000002875	STOX1	-2.14193	0.226576	1.79375e-10
ENSOCUG00000005959	ALOX12B	-3.24693	0.105336	1.80924e-10
ENSOCUG00000039375		-3.4285	0.0928795	1.81876e-10
ENSOCUG00000011224	RNF24	1.44359	2.71998	1.8376e-10
ENSOCUG00000006124	LNP1	4.00482	16.0535	1.88393e-10
ENSOCUG00000035319	LOC103347371	-2.34672	0.196593	1.9032e-10
ENSOCUG00000027507	VDR	-2.44503	0.183642	1.9032e-10
ENSOCUG00000001360	GAB3	-1.3087	0.403685	1.94339e-10
ENSOCUG00000022669	LOC100358819	-1.14917	0.450885	2.01909e-10
ENSOCUG00000000310	IGDCC3	-1.28269	0.41103	2.02349e-10
ENSOCUG00000011452	LOC103352261	2.36917	5.16643	2.05712e-10
ENSOCUG00000005513	FKBP5	1.57272	2.97464	2.13067e-10
ENSOCUG00000000852	CCDC181	-1.10696	0.464272	2.18905e-10
ENSOCUG00000000688	FBXO27	-1.12528	0.458412	2.27808e-10
ENSOCUG00000013296	GADD45G	-2.04409	0.242475	2.39173e-10
ENSOCUG00000002431	KCNC4	4.1556	17.8221	2.39248e-10
ENSOCUG00000033664		2.15838	4.46415	2.59764e-10
ENSOCUG00000013769	SH3PXD2A	2.14348	4.41827	2.60866e-10
ENSOCUG00000027790	NEURL1B	1.5308	2.88945	2.63952e-10
ENSOCUG00000010594	CASQ2	3.02873	8.16089	2.75846e-10
ENSOCUG00000025617	CDH13	2.74028	6.68201	2.97483e-10
ENSOCUG00000012443	FAM189A1	-1.36057	0.389429	3.0111e-10
ENSOCUG00000038704		1.16446	2.24149	3.04549e-10
ENSOCUG00000029212	TTC38	1.4637	2.75815	3.11786e-10
ENSOCUG00000009258	AMIGO2	-1.39653	0.379842	3.27907e-10
ENSOCUG00000005816	SORBS2	2.5119	5.7037	3.29909e-10
ENSOCUG00000000973	CALN1	-2.70256	0.15362	3.37378e-10
ENSOCUG00000017147	CDS1	1.57291	2.97504	3.50676e-10
ENSOCUG00000016630	KIF21A	-1.23843	0.423833	3.62828e-10
ENSOCUG00000005671	SLC9B1	-1.41147	0.375928	3.71933e-10
ENSOCUG00000001799	EPB41L2	1.2993	2.46109	3.72173e-10
ENSOCUG00000013625	PRSS12	2.04405	4.12402	3.78821e-10
ENSOCUG00000025995	ASB2	1.53452	2.89693	4.01154e-10
ENSOCUG00000011697	VCAM1	2.57778	5.97021	4.15624e-10
ENSOCUG00000029346	CALY	-1.65365	0.317835	4.28809e-10
ENSOCUG00000007837	LRRC39	3.27314	9.66749	4.49729e-10
ENSOCUG00000005274	PRLR	1.82035	3.53166	4.56895e-10
ENSOCUG00000014818	KCNN2	1.10285	2.14779	4.75941e-10
ENSOCUG00000023931	BGN	1.59982	3.03105	5.08237e-10
ENSOCUG00000029630	ALKAL2	6.48506	89.577	5.0991e-10
ENSOCUG00000037200		3.23879	9.44005	5.29041e-10
ENSOCUG00000007365	KCNS3	1.81717	3.52388	5.34745e-10
ENSOCUG00000017084	HCN1	4.06624	16.7518	5.60061e-10
ENSOCUG00000036699	LOC100358731	-2.29258	0.20411	5.67418e-10
ENSOCUG00000033140		1.78707	3.45113	5.68664e-10
ENSOCUG00000017595	EPHA5	-1.7062	0.306465	5.77977e-10
ENSOCUG00000004497	TAF7L	4.17577	18.0731	5.93946e-10
ENSOCUG00000005422	SNAI1	1.93327	3.81919	6.10378e-10
ENSOCUG00000010264	DGKI	-3.31288	0.100629	6.38152e-10
ENSOCUG00000022161		-1.18743	0.439083	6.41829e-10
ENSOCUG00000006461	GALK2	1.10347	2.14871	6.72473e-10
ENSOCUG00000036016		-1.89441	0.268983	6.95421e-10
ENSOCUG00000006280	CDSN	-2.39561	0.190042	6.97174e-10
ENSOCUG00000001050	ZFAND6	1.04598	2.06477	6.97174e-10
ENSOCUG00000005106	CFAP57	-1.67163	0.313899	7.37761e-10
ENSOCUG00000021480	FOXS1	2.83024	7.11193	7.51191e-10
ENSOCUG00000013809	B3GNT6	2.24255	4.73232	7.62138e-10
ENSOCUG00000001839	PPP2R3A	1.42204	2.67963	8.0262e-10
ENSOCUG00000015669	ARAP2	1.45376	2.7392	8.19281e-10
ENSOCUG00000038697		2.07266	4.20663	8.38484e-10
ENSOCUG00000027150		8.43813	346.841	8.53659e-10
ENSOCUG00000001508	CUZD1	-2.41389	0.187649	9.14105e-10
ENSOCUG00000014832	STEAP2	1.57444	2.97819	9.36029e-10
ENSOCUG00000019211	ocu-mir-145	1.59529	3.02155	9.3712e-10
ENSOCUG00000008220	KIF26B	1.70609	3.26276	9.74347e-10
ENSOCUG00000015546	SLC24A4	-1.19168	0.437792	9.97441e-10
ENSOCUG00000002828	IGFBP4	1.60969	3.05186	1.02962e-09
ENSOCUG00000016197	RHBDL2	1.39538	2.63058	1.05116e-09
ENSOCUG00000011766	B3GALT5	-1.74638	0.298049	1.06193e-09
ENSOCUG00000008307	CD1A	1.11926	2.17235	1.12322e-09
ENSOCUG00000016703	TRERF1	1.04309	2.06064	1.14993e-09
ENSOCUG00000011533	RHOBTB1	1.13358	2.19402	1.22027e-09
ENSOCUG00000025543	LOC100359247	-3.6433	0.080031	1.28489e-09
ENSOCUG00000014063		1.4754	2.78061	1.2903e-09
ENSOCUG00000026619	MYO7B	4.30058	19.7062	1.3602e-09
ENSOCUG00000010770	PAK5	-3.39838	0.094839	1.39555e-09
ENSOCUG00000017334	PRDX3	-1.06833	0.47687	1.40489e-09
ENSOCUG00000012003	CCDC173	-1.45197	0.365523	1.41197e-09
ENSOCUG00000010843	PRKCD	1.11279	2.16264	1.51906e-09
ENSOCUG00000016560	ACKR4	-2.35972	0.194829	1.51952e-09
ENSOCUG00000005520	CLDN11	2.14377	4.41916	1.57753e-09
ENSOCUG00000004905	PLEKHD1	-2.77302	0.146298	1.59567e-09
ENSOCUG00000025433	CRY2	1.2037	2.3033	1.59689e-09
ENSOCUG00000015732	GASK1B	2.27782	4.84943	1.63942e-09
ENSOCUG00000008722	NEXMIF	-1.86012	0.275454	1.66423e-09
ENSOCUG00000016107	EFNA5	1.23448	2.35297	1.66996e-09
ENSOCUG00000016908	PDE8A	1.44087	2.71484	1.69931e-09
ENSOCUG00000004282		1.78063	3.43575	1.73667e-09
ENSOCUG00000038788		1.05202	2.07343	1.74824e-09
ENSOCUG00000030475		3.22405	9.34409	1.76577e-09
ENSOCUG00000026197	CTSD	1.55401	2.93632	1.81905e-09
ENSOCUG00000033029		2.37862	5.20039	1.93556e-09
ENSOCUG00000003831	C4orf19	-1.77232	0.292737	2.04376e-09
ENSOCUG00000038285	GRIN2A	-3.09633	0.116926	2.04376e-09
ENSOCUG00000007757	LHX2	-3.09725	0.116852	2.0653e-09
ENSOCUG00000011089	ITIH4	-2.4634	0.181318	2.10058e-09
ENSOCUG00000017565	KCP	1.75409	3.37313	2.15251e-09
ENSOCUG00000010024	PLPP3	1.34435	2.53916	2.16608e-09
ENSOCUG00000003436	SPTBN4	2.17882	4.52783	2.23721e-09
ENSOCUG00000005163	MAP2	-1.46317	0.362696	2.24263e-09
ENSOCUG00000015705	MAST4	1.50643	2.84107	2.39387e-09
ENSOCUG00000030993		-2.92793	0.131403	2.4201e-09
ENSOCUG00000003845	GRIK2	-2.56166	0.169381	2.51365e-09
ENSOCUG00000016177	EPB41L4B	-1.13274	0.456048	2.55047e-09
ENSOCUG00000005778	CPED1	3.40503	10.5929	2.61344e-09
ENSOCUG00000032015		-6.04325	0.0151636	2.83137e-09
ENSOCUG00000017826	FDX1	1.03859	2.05422	2.84666e-09
ENSOCUG00000002530	PTGS1	1.47017	2.77054	2.88908e-09
ENSOCUG00000027535	PEG10	-1.12235	0.459344	2.89118e-09
ENSOCUG00000030923		-2.78561	0.145027	2.90996e-09
ENSOCUG00000007516	PFKFB3	-1.11796	0.460744	3.12377e-09
ENSOCUG00000014513	IL27RA	1.78465	3.44534	3.18306e-09
ENSOCUG00000039306		2.70569	6.52371	3.28237e-09
ENSOCUG00000001627	SLC6A11	1.20406	2.30387	3.88061e-09
ENSOCUG00000006983	CPA2	-4.24972	0.0525662	4.00636e-09
ENSOCUG00000012959	ADAMTS20	2.33023	5.02885	4.00929e-09
ENSOCUG00000005112	FBXO32	1.02671	2.03737	4.18217e-09
ENSOCUG00000015939	LDHA	-1.35817	0.390077	4.30451e-09
ENSOCUG00000001169	RGS5	-1.01642	0.494341	4.36994e-09
ENSOCUG00000000409	COL6A2	1.1682	2.24731	4.41333e-09
ENSOCUG00000009041	BOD1L1	1.23402	2.35221	4.69544e-09
ENSOCUG00000000724	SLC7A7	1.96137	3.89431	4.79877e-09
ENSOCUG00000000721	PAMR1	1.68196	3.20863	4.81042e-09
ENSOCUG00000012517	AVIL	-2.84008	0.139654	4.83012e-09
ENSOCUG00000029538	FLVCR2	-1.52919	0.346472	5.00241e-09
ENSOCUG00000006497	PXDN	1.06486	2.09196	5.00241e-09
ENSOCUG00000006310	PPM1J	-2.15564	0.224434	5.06809e-09
ENSOCUG00000009676	LOC100357403	1.1093	2.15741	5.15908e-09
ENSOCUG00000022347	HENMT1	-2.01918	0.246698	5.2058e-09
ENSOCUG00000004245	CLCNKA	-2.78927	0.14466	5.20975e-09
ENSOCUG00000025675	EDN3	-2.05969	0.239867	5.60785e-09
ENSOCUG00000014767	PAG1	1.42128	2.67823	5.62231e-09
ENSOCUG00000007336	TMX4	1.0279	2.03905	5.67947e-09
ENSOCUG00000038463	LMLN2	-1.83581	0.280134	5.81806e-09
ENSOCUG00000014833	PLA2R1	2.0695	4.19742	6.43082e-09
ENSOCUG00000016642	PROM1	-1.07575	0.474425	6.97875e-09
ENSOCUG00000025149	LOC100338723	-1.46673	0.361801	7.04543e-09
ENSOCUG00000016712	DNER	1.30133	2.46455	7.05703e-09
ENSOCUG00000029332	CPN2	-3.51443	0.0875085	7.37194e-09
ENSOCUG00000009694	SRGAP1	1.48487	2.79891	7.42392e-09
ENSOCUG00000007904	ADCY9	2.01385	4.03859	7.42898e-09
ENSOCUG00000014595	TBX3	-1.03866	0.48678	7.44804e-09
ENSOCUG00000009952	NDST3	2.19037	4.56423	7.45764e-09
ENSOCUG00000000829	CYP2S1	-1.70152	0.307462	7.58407e-09
ENSOCUG00000037425	CRELD1	1.64798	3.13394	7.69624e-09
ENSOCUG00000008001	SLC38A5	-1.94423	0.259853	7.75406e-09
ENSOCUG00000030601		-4.76694	0.0367288	8.26515e-09
ENSOCUG00000026462	LUZP2	-3.20026	0.1088	8.3442e-09
ENSOCUG00000029263	RARRES1	-2.0947	0.234117	8.94881e-09
ENSOCUG00000008674	MCF2L2	-1.61216	0.327109	9.14672e-09
ENSOCUG00000011000	GAS7	1.46859	2.76751	9.26101e-09
ENSOCUG00000006817	HORMAD2	-2.10925	0.231767	9.41672e-09
ENSOCUG00000017018	RNF152	-1.78352	0.290474	9.64233e-09
ENSOCUG00000002924	LGALS3	-1.67574	0.313005	9.79245e-09
ENSOCUG00000013209	PTPRZ1	-2.05762	0.240213	1.02563e-08
ENSOCUG00000008832	CCDC113	-1.26089	0.417285	1.03275e-08
ENSOCUG00000004455	GUCY1A1	1.09012	2.12892	1.10059e-08
ENSOCUG00000016068	SERPINE1	1.55252	2.9333	1.11302e-08
ENSOCUG00000012353	SDSL	2.16679	4.49024	1.12954e-08
ENSOCUG00000017411	ADGRV1	-2.53119	0.172995	1.15898e-08
ENSOCUG00000000629	ARHGEF28	-1.16887	0.444771	1.15898e-08
ENSOCUG00000005605	LDLRAD4	1.17608	2.25961	1.16191e-08
ENSOCUG00000038906		2.59601	6.04613	1.17479e-08
ENSOCUG00000011141	RET	-1.82848	0.281561	1.17705e-08
ENSOCUG00000017243	FAR2	1.74582	3.35386	1.19971e-08
ENSOCUG00000016522	PDE1A	2.17984	4.53104	1.20278e-08
ENSOCUG00000025757	TMEM200B	1.29477	2.45338	1.20278e-08
ENSOCUG00000006248	IL15RA	2.43715	5.41571	1.33159e-08
ENSOCUG00000012279	ARMH4	1.13914	2.2025	1.38624e-08
ENSOCUG00000003372	ART3	4.03229	16.3622	1.38625e-08
ENSOCUG00000025961		-1.58855	0.332506	1.44336e-08
ENSOCUG00000013856	OTUD7A	-1.43012	0.371101	1.49023e-08
ENSOCUG00000017347	LEPR	-3.20266	0.108618	1.5094e-08
ENSOCUG00000004870	IL1RAP	1.33548	2.52359	1.56143e-08
ENSOCUG00000016135	ZCCHC12	-1.76531	0.294163	1.60402e-08
ENSOCUG00000035342		1.05383	2.07604	1.74268e-08
ENSOCUG00000009200	CYTIP	1.18908	2.28007	1.75504e-08
ENSOCUG00000026978	PROKR1	2.06108	4.17299	1.75837e-08
ENSOCUG00000007510	LRIG1	-1.04941	0.483164	1.79518e-08
ENSOCUG00000025671		-3.15638	0.112159	1.8148e-08
ENSOCUG00000001603	LRRC14B	-2.09794	0.233591	1.90139e-08
ENSOCUG00000011779	TNFRSF19	1.03018	2.04228	1.91229e-08
ENSOCUG00000023498	TBX2	2.19823	4.58917	1.95245e-08
ENSOCUG00000005747	COL16A1	1.9632	3.89926	1.96926e-08
ENSOCUG00000017871	ACTN2	-1.40969	0.376393	2.04269e-08
ENSOCUG00000004266	FAM222A	1.30868	2.47715	2.06079e-08
ENSOCUG00000007950	CPEB2	1.50808	2.84431	2.1461e-08
ENSOCUG00000013011	CDC42EP3	1.67319	3.18919	2.17918e-08
ENSOCUG00000001250	EDNRA	1.26294	2.39984	2.18472e-08
ENSOCUG00000012403	GDA	-1.06483	0.478029	2.20998e-08
ENSOCUG00000030703		1.3828	2.60775	2.25011e-08
ENSOCUG00000021202	ADGB	-3.20266	0.108619	2.26123e-08
ENSOCUG00000016490	CATSPER1	-1.58515	0.333291	2.29032e-08
ENSOCUG00000010109	BIRC3	1.63585	3.1077	2.32697e-08
ENSOCUG00000038574		2.12337	4.3571	2.34759e-08
ENSOCUG00000024788	LOC100351519	-1.3347	0.396473	2.3486e-08
ENSOCUG00000017761	TCF21	2.18334	4.54204	2.51043e-08
ENSOCUG00000016173	WNT2	4.83557	28.5529	2.61543e-08
ENSOCUG00000021287	HSPB6	2.329	5.02457	2.62599e-08
ENSOCUG00000037257	PAQR7	-1.66773	0.314748	2.64156e-08
ENSOCUG00000008610	DPYD	-1.02077	0.492853	2.82618e-08
ENSOCUG00000015613	TPST1	1.27665	2.42275	2.8917e-08
ENSOCUG00000004185	FNDC3B	1.7504	3.36453	2.93849e-08
ENSOCUG00000008645	S100A4	-2.10522	0.232417	2.98042e-08
ENSOCUG00000014732	RIMKLA	-1.55009	0.341489	3.22245e-08
ENSOCUG00000001215	HIPK3	1.22417	2.33621	3.37176e-08
ENSOCUG00000007162	ELL2	1.76348	3.39517	3.37989e-08
ENSOCUG00000006989	RAG1	-1.80396	0.286387	3.44298e-08
ENSOCUG00000008064	TRDN	-2.51779	0.174611	3.46416e-08
ENSOCUG00000037912		-1.89186	0.26946	3.47252e-08
ENSOCUG00000022033	ITLN1	-1.95619	0.257708	3.48433e-08
ENSOCUG00000025148	COL5A1	1.11763	2.1699	3.49473e-08
ENSOCUG00000015835	MYO1E	1.25827	2.39208	3.5079e-08
ENSOCUG00000000120	ADCYAP1R1	-1.60701	0.328278	3.51485e-08
ENSOCUG00000020895	VGLL3	5.24407	37.8985	3.53487e-08
ENSOCUG00000017845	MAB21L1	4.53022	23.1064	3.69594e-08
ENSOCUG00000008071	CST3	1.32155	2.49935	3.8109e-08
ENSOCUG00000027997	TESC	4.3537	20.4454	3.81407e-08
ENSOCUG00000013420	ADGRA2	1.50409	2.83645	3.84857e-08
ENSOCUG00000017064	UPK3A	-3.27598	0.103236	3.9874e-08
ENSOCUG00000014236	NUP210	1.50706	2.8423	4.09284e-08
ENSOCUG00000011234	FSHR	5.89069	59.33	4.20984e-08
ENSOCUG00000012907	TBX21	-4.30223	0.0506873	4.26526e-08
ENSOCUG00000012056	RNF43	1.90693	3.75009	4.46082e-08
ENSOCUG00000009729	RNF43	-1.43198	0.370622	4.46082e-08
ENSOCUG00000002557	CLSTN2	-1.66527	0.315285	4.54672e-08
ENSOCUG00000014237	GK5	1.21224	2.31696	4.57031e-08
ENSOCUG00000004430	LOC100350827	-5.72274	0.0189358	4.67936e-08
ENSOCUG00000006220	CLCN3	1.31372	2.48582	4.68107e-08
ENSOCUG00000027560	CACFD1	-1.63815	0.321267	4.75697e-08
ENSOCUG00000039099		-1.46313	0.362706	4.80481e-08
ENSOCUG00000003733	SPOCK3	-1.85754	0.275946	4.95123e-08
ENSOCUG00000015434	MAP3K5	2.06214	4.17606	5.15685e-08
ENSOCUG00000013864	PTHLH	-4.48003	0.04481	5.21639e-08
ENSOCUG00000021259	CCDC74B	-2.40526	0.188775	5.27705e-08
ENSOCUG00000003970	TAGLN3	-1.81483	0.284238	5.33317e-08
ENSOCUG00000002716	BTBD11	-1.5564	0.339999	5.44798e-08
ENSOCUG00000003823	SYTL3	1.51024	2.84858	5.50184e-08
ENSOCUG00000007196	C1orf127	-2.34563	0.196741	5.59668e-08
ENSOCUG00000002026	TBX18	4.14965	17.7488	5.59997e-08
ENSOCUG00000007694	CNIH3	-1.39559	0.380088	5.72673e-08
ENSOCUG00000027714	LOC100342535	-2.69059	0.1549	5.77724e-08
ENSOCUG00000002083	TMC7	1.1207	2.17452	5.94702e-08
ENSOCUG00000002947	SOST	2.11482	4.33136	6.23756e-08
ENSOCUG00000016758	LOC100346950	-7.42646	0.00581318	6.26719e-08
ENSOCUG00000015115	RAPGEF5	2.33102	5.03162	6.39308e-08
ENSOCUG00000006208	CIITA	-1.80468	0.286244	6.47264e-08
ENSOCUG00000017866	NMB	-1.79901	0.287373	6.89538e-08
ENSOCUG00000011954	UNC13B	1.27367	2.41775	7.05362e-08
ENSOCUG00000023246	LOC100359206	-7.36618	0.00606119	7.14025e-08
ENSOCUG00000025866	AK8	-1.6012	0.329603	7.16911e-08
ENSOCUG00000002301	CCNB1IP1	-1.08655	0.470885	7.65816e-08
ENSOCUG00000036240		1.42984	2.69417	7.68376e-08
ENSOCUG00000005770	MFSD13A	-1.27439	0.4134	7.7535e-08
ENSOCUG00000033934		-7.52668	0.00542306	7.86609e-08
ENSOCUG00000026526	PPM1E	-1.17332	0.443401	8.20134e-08
ENSOCUG00000016569	CHRM2	3.15887	8.93131	8.22884e-08
ENSOCUG00000001309	ISM1	-1.80514	0.286154	8.28376e-08
ENSOCUG00000015595	CDK8	-1.0143	0.495069	8.31874e-08
ENSOCUG00000012542	CACNA2D3	1.81688	3.5232	8.54113e-08
ENSOCUG00000011218	CFAP92	-1.68852	0.310245	8.63536e-08
ENSOCUG00000023878	SYNE1	1.88838	3.70218	8.86452e-08
ENSOCUG00000032226		2.16641	4.48906	9.02931e-08
ENSOCUG00000002859	ADAMTS5	1.92512	3.79769	9.06372e-08
ENSOCUG00000008028	NAP1L5	-2.87119	0.136674	9.18978e-08
ENSOCUG00000037799		-1.54668	0.342297	9.18978e-08
ENSOCUG00000013461	CRYL1	-1.02009	0.493085	9.4361e-08
ENSOCUG00000016027	SLC11A1	-1.72805	0.301859	9.58643e-08
ENSOCUG00000008312	STMN2	-2.62574	0.162022	9.8432e-08
ENSOCUG00000009176	ABHD3	1.31635	2.49035	1.00758e-07
ENSOCUG00000013292	SNCG	2.8013	6.97068	1.02507e-07
ENSOCUG00000001717	SKAP1	-1.54744	0.342116	1.04011e-07
ENSOCUG00000035603		1.14494	2.21137	1.04989e-07
ENSOCUG00000009702	FMOD	1.75059	3.36495	1.05428e-07
ENSOCUG00000039242		2.45021	5.46497	1.06045e-07
ENSOCUG00000017722	GMPR	1.44181	2.71662	1.09323e-07
ENSOCUG00000013276	COL4A2	1.21567	2.32248	1.09356e-07
ENSOCUG00000014644	PLA2G4A	1.10179	2.14621	1.09722e-07
ENSOCUG00000005284	IGSF3	1.79856	3.47874	1.11912e-07
ENSOCUG00000035647		2.05714	4.16159	1.12056e-07
ENSOCUG00000019293	ocu-mir-148a	-1.20632	0.433373	1.12128e-07
ENSOCUG00000011191	CARD11	1.82448	3.5418	1.12213e-07
ENSOCUG00000008137	MLLT3	-1.30269	0.40537	1.1406e-07
ENSOCUG00000017461	MYO3A	-2.10402	0.232609	1.1543e-07
ENSOCUG00000006774	SPEF2	1.85597	3.61996	1.16786e-07
ENSOCUG00000010692	RBKS	-1.06501	0.47797	1.19637e-07
ENSOCUG00000032092	STARD13	2.54368	5.83073	1.21991e-07
ENSOCUG00000011808	STARD13	1.62289	3.0799	1.21991e-07
ENSOCUG00000004187	PAX8	-1.99548	0.250785	1.24591e-07
ENSOCUG00000003307	BIRC7	1.41443	2.66555	1.24752e-07
ENSOCUG00000011526	AADAT	-1.27065	0.414473	1.2485e-07
ENSOCUG00000003186	HPRT1	1.00952	2.01324	1.26566e-07
ENSOCUG00000016103	HTR7	3.13368	8.77669	1.28043e-07
ENSOCUG00000021508	INAVA	1.36143	2.56939	1.29984e-07
ENSOCUG00000000744	PLTP	1.50728	2.84273	1.30862e-07
ENSOCUG00000027254	ATP4B	-3.69644	0.0771367	1.33744e-07
ENSOCUG00000027198	SLC38A4	-1.20514	0.433728	1.33757e-07
ENSOCUG00000017203	GNAO1	-1.56088	0.338944	1.34939e-07
ENSOCUG00000008856	HELZ	1.36855	2.58212	1.38167e-07
ENSOCUG00000007131	FAM187B	4.14395	17.6788	1.40406e-07
ENSOCUG00000013366	CRYBG1	1.34297	2.53674	1.42786e-07
ENSOCUG00000002988	ATP1B2	1.21355	2.31908	1.44012e-07
ENSOCUG00000036560		2.37789	5.19777	1.49954e-07
ENSOCUG00000016227	SVEP1	1.85325	3.61313	1.50047e-07
ENSOCUG00000001277	NECAB1	2.4494	5.46188	1.51432e-07
ENSOCUG00000015617	SLC25A31	-2.08169	0.236238	1.53381e-07
ENSOCUG00000008858	CORIN	2.93716	7.659	1.57443e-07
ENSOCUG00000011895	HYDIN	-1.55627	0.340029	1.63462e-07
ENSOCUG00000011051	TNFSF11	3.75336	13.4857	1.64012e-07
ENSOCUG00000027406		-1.48857	0.356366	1.65341e-07
ENSOCUG00000002630	HAPLN1	-1.14914	0.450893	1.68205e-07
ENSOCUG00000033373		3.2557	9.55135	1.81429e-07
ENSOCUG00000006003	ERP27	-1.87121	0.273344	1.82404e-07
ENSOCUG00000006573	SCAMP5	1.36868	2.58233	1.84526e-07
ENSOCUG00000027445	TCIM	-1.23526	0.424765	1.86962e-07
ENSOCUG00000026775	DEFB123	3.24007	9.44838	1.88015e-07
ENSOCUG00000000650	RERG	1.17595	2.25941	1.90436e-07
ENSOCUG00000036429		-7.25051	0.0065672	2.04923e-07
ENSOCUG00000022537		-1.11001	0.463292	2.11616e-07
ENSOCUG00000008757	MYOF	1.7983	3.4781	2.18198e-07
ENSOCUG00000030033	MYOF	1.08173	2.11657	2.18198e-07
ENSOCUG00000007763	CACNA2D1	1.93175	3.81518	2.20876e-07
ENSOCUG00000008202	FAS	1.74649	3.35541	2.22024e-07
ENSOCUG00000016683	DUSP15	2.73524	6.65868	2.22814e-07
ENSOCUG00000008015	LOC100343860	-3.45297	0.0913172	2.23078e-07
ENSOCUG00000002553	EMILIN2	1.38906	2.61909	2.23109e-07
ENSOCUG00000007538	BPIFA1	-6.48514	0.011163	2.24571e-07
ENSOCUG00000000504	PGC	-3.75395	0.074122	2.31476e-07
ENSOCUG00000026477	LOC100350027	-2.6969	0.154225	2.31632e-07
ENSOCUG00000030161		-1.70054	0.307672	2.34736e-07
ENSOCUG00000006139	SEMA5B	-1.10011	0.466482	2.35652e-07
ENSOCUG00000002893	C7orf57	-1.45322	0.365206	2.38973e-07
ENSOCUG00000012557	SOX6	1.69798	3.24446	2.40743e-07
ENSOCUG00000000157	ST3GAL1	1.2528	2.38304	2.44535e-07
ENSOCUG00000001105	PLA2G1B	2.42668	5.37655	2.48042e-07
ENSOCUG00000035434		1.29895	2.46049	2.48161e-07
ENSOCUG00000025320		-1.40464	0.377712	2.60044e-07
ENSOCUG00000016143	GALNT6	2.57248	5.94832	2.83134e-07
ENSOCUG00000026389	RASSF10	-1.99571	0.250744	2.84596e-07
ENSOCUG00000027985	TNFRSF12A	2.04134	4.11627	2.88945e-07
ENSOCUG00000002473	OLFML2A	1.28782	2.44159	2.91374e-07
ENSOCUG00000013774	CDH8	-1.14386	0.452549	2.91669e-07
ENSOCUG00000027183	NTN1	2.66284	6.33277	3.02864e-07
ENSOCUG00000038723		-2.81519	0.142083	3.03462e-07
ENSOCUG00000017236	LRRC2	1.53624	2.90037	3.03969e-07
ENSOCUG00000023679	RBP5	-1.08168	0.472478	3.15719e-07
ENSOCUG00000009707	PRELP	1.50552	2.83926	3.19225e-07
ENSOCUG00000012185	CRACD	-1.0678	0.477045	3.26375e-07
ENSOCUG00000015193	SLC45A4	1.01815	2.02532	3.27878e-07
ENSOCUG00000014121	B4GALNT1	-1.0432	0.485249	3.55665e-07
ENSOCUG00000023769	PTGES	-1.39445	0.38039	3.59245e-07
ENSOCUG00000003785	HIPK1	1.36629	2.57806	3.61299e-07
ENSOCUG00000028053	ASPN	1.86937	3.65374	3.65224e-07
ENSOCUG00000039353		1.25007	2.37854	3.69638e-07
ENSOCUG00000012080	SLC18A2	-2.08146	0.236275	3.92296e-07
ENSOCUG00000008619	TMCC3	-1.42383	0.372723	4.01679e-07
ENSOCUG00000004599	LGI4	1.30107	2.46412	4.01926e-07
ENSOCUG00000026567	HLA-DMB	-1.58903	0.332395	4.07031e-07
ENSOCUG00000006239	CSMD3	1.94374	3.847	4.19073e-07
ENSOCUG00000002877	PLCXD3	2.56393	5.91316	4.33693e-07
ENSOCUG00000007683	RALGPS1	1.20175	2.30019	4.37942e-07
ENSOCUG00000011396	XIRP1	3.87714	14.6938	4.47113e-07
ENSOCUG00000008805	CDH1	1.411	2.65921	4.57754e-07
ENSOCUG00000009332	MCOLN3	2.23733	4.71522	4.75141e-07
ENSOCUG00000001102	L1CAM	2.08698	4.24858	4.84564e-07
ENSOCUG00000011816	HPD	-1.95732	0.257506	5.04369e-07
ENSOCUG00000007540		-2.44746	0.183333	5.0537e-07
ENSOCUG00000009461	ESYT3	-1.56584	0.337781	5.0537e-07
ENSOCUG00000002935	TENT5C	2.27905	4.85357	5.14432e-07
ENSOCUG00000016740	DPF3	-1.17381	0.44325	5.1592e-07
ENSOCUG00000017497	FREM3	4.97874	31.5318	5.19904e-07
ENSOCUG00000014305		7.23612	150.761	5.24243e-07
ENSOCUG00000005317	CRACR2A	1.58632	3.00283	5.49154e-07
ENSOCUG00000008330	CSRP2	-1.16616	0.445607	5.50403e-07
ENSOCUG00000011273	KIF5A	1.46852	2.76738	5.87301e-07
ENSOCUG00000014011	GRIP1	-1.17742	0.44214	5.87742e-07
ENSOCUG00000013686	WNT5B	-1.12005	0.460076	5.92146e-07
ENSOCUG00000003979	MANSC1	1.22413	2.33614	5.92431e-07
ENSOCUG00000026610	TMEM100	-1.06156	0.479114	5.96342e-07
ENSOCUG00000016736	MAP7D2	-1.20533	0.43367	6.06914e-07
ENSOCUG00000001597	ADAMDEC1	3.28648	9.75728	6.12194e-07
ENSOCUG00000016983	TMPRSS4	-1.99522	0.250829	6.18047e-07
ENSOCUG00000011584	GABRG3	-1.86944	0.27368	6.2472e-07
ENSOCUG00000035831		1.88619	3.69657	6.29158e-07
ENSOCUG00000005218	MTUS1	1.33038	2.51469	6.59803e-07
ENSOCUG00000017719	NEK5	-1.44794	0.366543	6.669e-07
ENSOCUG00000021271	NCAN	-1.04914	0.483258	6.77704e-07
ENSOCUG00000022431	PRDM7	-4.61243	0.0408807	6.80658e-07
ENSOCUG00000022782	CHRDL2	-1.46742	0.361628	6.97827e-07
ENSOCUG00000003405	MFSD6	1.16842	2.24765	6.98737e-07
ENSOCUG00000033751		-3.69371	0.0772825	7.20528e-07
ENSOCUG00000033457		1.15805	2.23155	7.23906e-07
ENSOCUG00000007602	HS3ST1	2.04715	4.13288	7.28514e-07
ENSOCUG00000012972	CRYAB	2.14287	4.41641	7.76869e-07
ENSOCUG00000004688	PKHD1L1	2.45915	5.49891	8.01731e-07
ENSOCUG00000010340	ALOX15B	-4.16667	0.055681	8.07092e-07
ENSOCUG00000011230	MMP16	1.38058	2.60373	8.44783e-07
ENSOCUG00000026544	CYP2A11	-5.1754	0.0276726	8.56488e-07
ENSOCUG00000017653	CBS	-1.28233	0.411132	8.62914e-07
ENSOCUG00000014187	MINAR1	2.91685	7.55193	8.79992e-07
ENSOCUG00000000810	PRICKLE2	1.79878	3.47925	8.79992e-07
ENSOCUG00000004834	F3	2.31976	4.99249	8.9036e-07
ENSOCUG00000006105	CDHR1	-1.33855	0.395417	9.04176e-07
ENSOCUG00000010159	FADS6	1.35054	2.55008	9.17387e-07
ENSOCUG00000008253	TFPI	1.48431	2.79783	9.47591e-07
ENSOCUG00000001617	MTMR8	1.10923	2.15731	9.53884e-07
ENSOCUG00000002020	LGI3	1.97383	3.92809	9.92781e-07
ENSOCUG00000000968	DES	1.23015	2.34591	9.94591e-07
ENSOCUG00000027452		1.73076	3.31903	9.98914e-07
ENSOCUG00000003052	SLC16A7	-1.4443	0.367469	1.00181e-06
ENSOCUG00000003735	HCAR1	-1.52721	0.346948	1.03177e-06
ENSOCUG00000007967	FHL2	1.43899	2.71131	1.06877e-06
ENSOCUG00000004123	PLA2G3	2.07438	4.21162	1.07062e-06
ENSOCUG00000026691	SLC31A2	1.08415	2.12012	1.11059e-06
ENSOCUG00000015494	NIN	-1.15044	0.450489	1.13925e-06
ENSOCUG00000002457	CNPY1	-2.5617	0.169376	1.14262e-06
ENSOCUG00000001816	PLCE1	1.76865	3.40736	1.15144e-06
ENSOCUG00000002674	KCNG3	2.36908	5.1661	1.15426e-06
ENSOCUG00000011383	FAM241A	1.32335	2.50247	1.16418e-06
ENSOCUG00000015499	LDB2	-1.10931	0.463516	1.18722e-06
ENSOCUG00000014125	PGM5	3.30953	9.91445	1.19654e-06
ENSOCUG00000013059	BHLHB9	1.03033	2.0425	1.20102e-06
ENSOCUG00000011787	ANXA13	5.04638	33.0454	1.22005e-06
ENSOCUG00000002539	SLC22A1	-1.25607	0.418683	1.25296e-06
ENSOCUG00000006203	DUSP27	2.39478	5.25896	1.26465e-06
ENSOCUG00000022990	NXNL2	-1.38593	0.382641	1.2871e-06
ENSOCUG00000017937	HSD17B10	-1.07878	0.47343	1.30776e-06
ENSOCUG00000006829	ARHGEF37	-1.4203	0.373634	1.32192e-06
ENSOCUG00000016546	CNTNAP5	-1.90356	0.267283	1.3256e-06
ENSOCUG00000006969	DCN	1.03296	2.04622	1.33551e-06
ENSOCUG00000000672	EPHA7	1.26505	2.40335	1.33639e-06
ENSOCUG00000037996		3.81229	14.0479	1.35581e-06
ENSOCUG00000013751	MCUB	-1.1855	0.439672	1.36823e-06
ENSOCUG00000014805	WNT3	-1.59337	0.331397	1.3719e-06
ENSOCUG00000010325	SLAIN1	1.0018	2.0025	1.37711e-06
ENSOCUG00000022679	PSD3	-1.08268	0.472152	1.3926e-06
ENSOCUG00000012248	VSTM2A	-2.67617	0.156456	1.3941e-06
ENSOCUG00000004480	CSRP3	4.34966	20.3882	1.41344e-06
ENSOCUG00000014480	C1R	1.2011	2.29915	1.43229e-06
ENSOCUG00000039045		-4.37424	0.0482193	1.4387e-06
ENSOCUG00000026831	LOC100342253	1.4496	2.73132	1.49806e-06
ENSOCUG00000009203	LGR5	-3.64096	0.0801608	1.5289e-06
ENSOCUG00000029266	CALHM6	-4.11607	0.0576686	1.53925e-06
ENSOCUG00000001685	SLC7A8	1.78325	3.44202	1.54665e-06
ENSOCUG00000003715	LAX1	4.24371	18.9446	1.55537e-06
ENSOCUG00000013917	CFAP54	-1.59798	0.33034	1.55962e-06
ENSOCUG00000034906		-3.13275	0.114011	1.56864e-06
ENSOCUG00000007929	STAT6	1.30615	2.47282	1.57028e-06
ENSOCUG00000017943	LCP1	1.77557	3.42372	1.57413e-06
ENSOCUG00000031721	HSBP1L1	3.53857	11.6202	1.58446e-06
ENSOCUG00000031535		1.23436	2.35277	1.58446e-06
ENSOCUG00000001814	GUCY1B1	1.13961	2.20321	1.61323e-06
ENSOCUG00000024751	FCGRT	1.33418	2.52132	1.65187e-06
ENSOCUG00000006216	SERPINB6	-1.05311	0.481929	1.67106e-06
ENSOCUG00000005399	EPO	-1.67634	0.312875	1.69559e-06
ENSOCUG00000014888	IFNAR1	1.18731	2.27728	1.75101e-06
ENSOCUG00000025164	LOC100358248	1.70212	3.25379	1.76241e-06
ENSOCUG00000032959		-1.50621	0.352035	1.78719e-06
ENSOCUG00000028060	VGLL1	5.49634	45.1403	1.78916e-06
ENSOCUG00000006985	ITLN2	-1.72876	0.301711	1.80529e-06
ENSOCUG00000005101	LAMB2	1.03864	2.05429	1.80838e-06
ENSOCUG00000031274	BLACAT1	1.33479	2.52239	1.92718e-06
ENSOCUG00000000403	ITGA6	-1.05321	0.481893	1.94274e-06
ENSOCUG00000026094		-3.7998	0.0718038	2.00039e-06
ENSOCUG00000000674	KCNA5	3.035	8.19646	2.0066e-06
ENSOCUG00000014093	GNRH1	-1.67937	0.31222	2.01103e-06
ENSOCUG00000010782	LRRC8C	1.01366	2.01903	2.02015e-06
ENSOCUG00000022823	ID3	1.93838	3.83276	2.02355e-06
ENSOCUG00000039434		1.40944	2.65633	2.0622e-06
ENSOCUG00000015634	TNNT2	4.3285	20.0913	2.07524e-06
ENSOCUG00000003247	MRC1	1.60491	3.04176	2.13758e-06
ENSOCUG00000017120	PDK4	2.25955	4.78843	2.13989e-06
ENSOCUG00000015423	ZDHHC23	-1.22624	0.427429	2.14157e-06
ENSOCUG00000007580	RAB30	1.15318	2.22403	2.15552e-06
ENSOCUG00000029251		-1.61571	0.326305	2.16966e-06
ENSOCUG00000029398	SALL3	-3.72206	0.0757788	2.17906e-06
ENSOCUG00000025477	MYF5	-2.417	0.187245	2.21519e-06
ENSOCUG00000007978	NRP2	-1.02491	0.491442	2.36166e-06
ENSOCUG00000004494	THSD7B	-1.64718	0.319263	2.5017e-06
ENSOCUG00000021974		2.11065	4.31885	2.5109e-06
ENSOCUG00000001473	S100B	1.57634	2.98211	2.52606e-06
ENSOCUG00000038763	ATOX1	1.35373	2.55572	2.53323e-06
ENSOCUG00000023490	PRICKLE1	1.36703	2.5794	2.54851e-06
ENSOCUG00000001969	RAB3B	-1.85263	0.276887	2.54851e-06
ENSOCUG00000022659	EFCC1	-1.15181	0.45006	2.56683e-06
ENSOCUG00000014367	SGK1	1.3332	2.51961	2.61796e-06
ENSOCUG00000015188	LOC100344284	-7.10838	0.00724708	2.71817e-06
ENSOCUG00000011392	ENKUR	-1.25081	0.420213	2.73918e-06
ENSOCUG00000000834	INSYN2B	-1.99612	0.250674	2.74018e-06
ENSOCUG00000030141	TPBGL	-2.03037	0.244792	2.78294e-06
ENSOCUG00000014231	TPBGL	1.35977	2.56644	2.78294e-06
ENSOCUG00000013919	FGD4	1.33287	2.51903	2.78943e-06
ENSOCUG00000002771	TOB1	1.56616	2.96115	2.80993e-06
ENSOCUG00000031234		-4.53061	0.0432663	2.84337e-06
ENSOCUG00000007349	LOC100356534	-1.76444	0.294342	2.85069e-06
ENSOCUG00000003594	OLFML2B	2.37904	5.20192	2.87848e-06
ENSOCUG00000014540	RHBDF2	1.02636	2.03688	2.88715e-06
ENSOCUG00000019393	SNORA74	-1.01869	0.493564	2.90251e-06
ENSOCUG00000013717		-2.1295	0.228536	2.91159e-06
ENSOCUG00000036919		1.93248	3.81712	2.9157e-06
ENSOCUG00000008985	EBF1	1.31752	2.49238	2.98638e-06
ENSOCUG00000012120	SPARC	1.53511	2.89811	3.01125e-06
ENSOCUG00000038322		-1.19354	0.43723	3.04343e-06
ENSOCUG00000013629	COL2A1	1.44645	2.72536	3.05745e-06
ENSOCUG00000015956	LRMP	1.67519	3.19362	3.11556e-06
ENSOCUG00000008657	CGREF1	2.5516	5.86285	3.16687e-06
ENSOCUG00000007852	UGP2	1.27571	2.42118	3.18661e-06
ENSOCUG00000037930	LOC103348206	3.04395	8.24745	3.28045e-06
ENSOCUG00000008408	ATF7IP2	-1.03545	0.487863	3.39386e-06
ENSOCUG00000005365	SSBP2	1.18091	2.2672	3.39826e-06
ENSOCUG00000037336		1.44569	2.72393	3.42311e-06
ENSOCUG00000010895	SVIL	1.01642	2.02289	3.47986e-06
ENSOCUG00000039581		-1.44488	0.367322	3.48427e-06
ENSOCUG00000017345	LOC100341560	-2.14753	0.225699	3.48532e-06
ENSOCUG00000035361		-1.22826	0.426833	3.50926e-06
ENSOCUG00000010097	LOC100346672	1.51305	2.85413	3.57877e-06
ENSOCUG00000023658	ERICH2	-2.49482	0.177413	3.59952e-06
ENSOCUG00000009469		-1.09233	0.469003	3.60499e-06
ENSOCUG00000002285	SLITRK2	-1.10327	0.465459	3.69537e-06
ENSOCUG00000010754	NIPA1	-1.03168	0.489142	3.73946e-06
ENSOCUG00000008543	TNN	1.7252	3.30627	3.90247e-06
ENSOCUG00000004211	TMEM102	1.2163	2.32351	3.91504e-06
ENSOCUG00000013289	PACRG	-1.17285	0.443544	3.94892e-06
ENSOCUG00000014861	MAPRE3	1.20457	2.30469	3.98966e-06
ENSOCUG00000001075	MORN2	-1.49357	0.355134	4.05363e-06
ENSOCUG00000014433	NYAP2	-3.90655	0.0666825	4.09192e-06
ENSOCUG00000009813	KLF7	1.77365	3.41917	4.09427e-06
ENSOCUG00000009754	LRRC6	-1.58175	0.334077	4.10398e-06
ENSOCUG00000009092	PSMA8	-2.20434	0.216984	4.10398e-06
ENSOCUG00000000174	EXOC6	1.06258	2.08867	4.24926e-06
ENSOCUG00000034137		-2.41085	0.188045	4.41215e-06
ENSOCUG00000000974	RASGRP2	1.71165	3.27536	4.48129e-06
ENSOCUG00000032142		1.92394	3.79458	4.50359e-06
ENSOCUG00000016641	ADGRG3	2.076	4.21638	4.54929e-06
ENSOCUG00000026087	LOC100339032	5.19419	36.6105	4.65325e-06
ENSOCUG00000022868	AMY2A	-2.29201	0.204191	4.84301e-06
ENSOCUG00000029735		-1.30039	0.406016	4.85604e-06
ENSOCUG00000015047	CNTN5	-1.52763	0.346846	4.94085e-06
ENSOCUG00000003103	CXADR	1.21568	2.3225	4.94958e-06
ENSOCUG00000012693	LDB3	1.69026	3.22714	4.96549e-06
ENSOCUG00000004252	FAM131C	-1.59755	0.330439	5.01552e-06
ENSOCUG00000009185	GALNT5	-1.71822	0.303924	5.15392e-06
ENSOCUG00000000136	BNC1	-1.89246	0.269348	5.27674e-06
ENSOCUG00000030876		-5.50623	0.0220019	5.28695e-06
ENSOCUG00000002751	SFXN3	1.68978	3.22608	5.33639e-06
ENSOCUG00000029626	LOC100356851	1.74274	3.34671	5.37318e-06
ENSOCUG00000032835		3.65764	12.62	5.38291e-06
ENSOCUG00000034453		-3.26128	0.104293	5.39222e-06
ENSOCUG00000029958		1.26276	2.39954	5.45395e-06
ENSOCUG00000001887	TMEM245	1.02002	2.02795	5.4716e-06
ENSOCUG00000002636	FAM160A1	-1.46635	0.361898	5.51639e-06
ENSOCUG00000036990		-4.77814	0.0364449	5.78599e-06
ENSOCUG00000001299	MICAL2	1.45461	2.74083	6.094e-06
ENSOCUG00000008781	ADAM12	1.87757	3.67456	6.14701e-06
ENSOCUG00000017694	KRT23	-2.14597	0.225943	6.35887e-06
ENSOCUG00000002042	NAALADL2	1.55025	2.92868	6.63895e-06
ENSOCUG00000026982	ADPRHL1	1.45876	2.74872	6.70921e-06
ENSOCUG00000010709	SPAG4	-1.05997	0.479643	6.75315e-06
ENSOCUG00000030469		-3.66112	0.0790482	6.89478e-06
ENSOCUG00000002658	EYA2	-2.51609	0.174816	7.00507e-06
ENSOCUG00000009358	ZIC3	-1.95684	0.257592	7.09404e-06
ENSOCUG00000031027		2.94434	7.69722	7.18094e-06
ENSOCUG00000014520	CAV1	1.27844	2.42577	7.19956e-06
ENSOCUG00000015952	TIMP4	1.77031	3.41126	7.19984e-06
ENSOCUG00000013753	SYTL2	1.59628	3.02363	7.30686e-06
ENSOCUG00000031930		1.27741	2.42404	7.3526e-06
ENSOCUG00000009679	THEM5	1.4965	2.82158	7.42919e-06
ENSOCUG00000016779	SOX3	-1.94854	0.259078	7.49994e-06
ENSOCUG00000025094	USP26	-1.61207	0.327128	7.65832e-06
ENSOCUG00000004500	TACC1	1.01715	2.02392	7.74668e-06
ENSOCUG00000007603	CHST15	1.15416	2.22555	7.83019e-06
ENSOCUG00000002335	LRRC9	-1.64101	0.320631	8.02484e-06
ENSOCUG00000001720	HOXB1	-2.72856	0.150876	8.21348e-06
ENSOCUG00000015600	CDH7	3.38027	10.4127	8.39584e-06
ENSOCUG00000010371	FRZB	1.98141	3.94879	8.46266e-06
ENSOCUG00000016750	SLC41A2	1.17211	2.25341	8.52288e-06
ENSOCUG00000022474	Y_RNA	-1.30831	0.403792	8.63814e-06
ENSOCUG00000008131	TRIM62	1.3101	2.47959	8.63814e-06
ENSOCUG00000036675		1.78053	3.43552	8.81641e-06
ENSOCUG00000034343		-3.68443	0.0777812	8.88629e-06
ENSOCUG00000006357	ADAMTS12	3.15253	8.89214	8.89703e-06
ENSOCUG00000012339	PEG3	-1.01835	0.493681	8.97224e-06
ENSOCUG00000037892	LOC103352048	-2.47446	0.179934	8.97391e-06
ENSOCUG00000017051	BPIFB1	-2.70984	0.152847	9.22609e-06
ENSOCUG00000004160	FAM107A	-1.27468	0.413316	9.26999e-06
ENSOCUG00000017314	MGAT4C	-1.97918	0.253634	9.30542e-06
ENSOCUG00000037851		-1.14766	0.451355	9.47862e-06
ENSOCUG00000014417		1.1312	2.19041	9.53329e-06
ENSOCUG00000038988		-6.87616	0.00851276	9.61015e-06
ENSOCUG00000023091	PKIB	1.56514	2.95906	9.78759e-06
ENSOCUG00000036276		1.11581	2.16716	9.99158e-06
ENSOCUG00000004106	GLDC	-1.33471	0.396473	1.02474e-05
ENSOCUG00000010551	SLC7A3	-1.44066	0.3684	1.04628e-05
ENSOCUG00000015347	TMEM108	-1.27966	0.411892	1.06649e-05
ENSOCUG00000009984	DEFB124	-2.63481	0.161006	1.08621e-05
ENSOCUG00000023853	LOC100357467	-4.57276	0.0420206	1.09579e-05
ENSOCUG00000007240	ST8SIA6	-3.12628	0.114524	1.11331e-05
ENSOCUG00000004877	ZNF385B	-1.49103	0.355759	1.11644e-05
ENSOCUG00000023701	OACYL	-3.24663	0.105358	1.1188e-05
ENSOCUG00000016833	ARMH1	-3.16631	0.11139	1.13314e-05
ENSOCUG00000026551	LPAR5	-1.13446	0.455505	1.13539e-05
ENSOCUG00000012196	TRIM50	1.56402	2.95676	1.14913e-05
ENSOCUG00000016936	MMRN2	1.30389	2.46893	1.20757e-05
ENSOCUG00000005073	USP18	-1.01302	0.495506	1.21662e-05
ENSOCUG00000017569	SLC5A1	2.97902	7.88452	1.21906e-05
ENSOCUG00000017113	ASB4	1.16424	2.24115	1.22612e-05
ENSOCUG00000007652	STMN4	-4.5438	0.0428725	1.22612e-05
ENSOCUG00000000861	CD82	1.42925	2.69307	1.26194e-05
ENSOCUG00000035379		-4.68983	0.0387454	1.3145e-05
ENSOCUG00000006084	CMBL	-1.20926	0.43249	1.3145e-05
ENSOCUG00000015020	COL5A2	1.51259	2.85321	1.3145e-05
ENSOCUG00000015280	CYP2C2	-3.03355	0.122127	1.36543e-05
ENSOCUG00000006444	CD109	1.29003	2.44533	1.36975e-05
ENSOCUG00000015928	WNK4	-1.06949	0.476486	1.39766e-05
ENSOCUG00000012207	NEBL	1.81479	3.51808	1.40724e-05
ENSOCUG00000006134	SMAD6	1.50918	2.84648	1.43562e-05
ENSOCUG00000003263	SLCO5A1	-1.59639	0.330704	1.46644e-05
ENSOCUG00000037497		-1.02355	0.491906	1.55759e-05
ENSOCUG00000009050	RELN	2.28938	4.88847	1.65605e-05
ENSOCUG00000004438		1.50883	2.84579	1.65722e-05
ENSOCUG00000016751		-1.80305	0.286569	1.69108e-05
ENSOCUG00000007895	DNAH1	-1.60416	0.328928	1.75118e-05
ENSOCUG00000004074	ACTC1	-1.99175	0.251433	1.75955e-05
ENSOCUG00000004231	BACH2	-1.61485	0.3265	1.7724e-05
ENSOCUG00000001027	NOBOX	-1.75963	0.295323	1.80775e-05
ENSOCUG00000024303	ATP6V1B1	-3.82005	0.070803	1.82117e-05
ENSOCUG00000001144	SLC6A6	-1.04233	0.485541	1.82225e-05
ENSOCUG00000015757	PIM2	1.15702	2.22997	1.84712e-05
ENSOCUG00000010374	CER1	1.97008	3.9179	1.8552e-05
ENSOCUG00000034638		1.49238	2.81353	1.88382e-05
ENSOCUG00000027029	ARID5B	1.04693	2.06613	1.8898e-05
ENSOCUG00000000981	INPP5J	1.12155	2.17581	1.91367e-05
ENSOCUG00000011540	LINGO2	-1.54972	0.341576	1.93272e-05
ENSOCUG00000024150	SYN1	2.05585	4.15788	2.02966e-05
ENSOCUG00000000255	ARHGEF6	1.58275	2.99541	2.06921e-05
ENSOCUG00000015622	METTL7A	2.27684	4.84617	2.07174e-05
ENSOCUG00000021885		1.38807	2.61728	2.11527e-05
ENSOCUG00000034829		-2.95238	0.129195	2.14502e-05
ENSOCUG00000023927		-1.1866	0.439337	2.26549e-05
ENSOCUG00000034824		-6.30685	0.0126314	2.31279e-05
ENSOCUG00000022715	ZFHX2	1.45223	2.7363	2.37826e-05
ENSOCUG00000033354	APELA	-1.99524	0.250826	2.40127e-05
ENSOCUG00000008181	CPE	-1.02379	0.491822	2.40127e-05
ENSOCUG00000034315		-1.77275	0.292651	2.46372e-05
ENSOCUG00000024272	NEXN	1.78443	3.44482	2.47464e-05
ENSOCUG00000001183	SH3GL2	-1.24622	0.42155	2.48742e-05
ENSOCUG00000021436	LOC103349708	2.86029	7.26162	2.49208e-05
ENSOCUG00000005899	PDPN	-1.09622	0.467741	2.49797e-05
ENSOCUG00000030440		2.10752	4.30949	2.51563e-05
ENSOCUG00000033142		1.58987	3.01021	2.59141e-05
ENSOCUG00000014006	APOO	-1.2966	0.407084	2.59349e-05
ENSOCUG00000011158	FAM131B	-1.27575	0.41301	2.70949e-05
ENSOCUG00000022701	LOC103351872	-1.69752	0.308315	2.71386e-05
ENSOCUG00000033177		7.22159	149.251	2.75896e-05
ENSOCUG00000033276		-1.55223	0.340982	2.89868e-05
ENSOCUG00000004045	MFSD6L	2.10933	4.3149	2.93118e-05
ENSOCUG00000016096	LOC103345701	6.69877	103.88	3.05575e-05
DTOCUGWNT6	WNT6	-1.11959	0.460225	3.19722e-05
ENSOCUG00000032427		-2.73926	0.149762	3.21931e-05
ENSOCUG00000035165		2.43743	5.41677	3.24185e-05
ENSOCUG00000001748	TMTC1	3.21045	9.25638	3.25626e-05
ENSOCUG00000004750	GRHL2	-2.16448	0.223062	3.25626e-05
ENSOCUG00000010231	CHRNE	1.41764	2.67148	3.2648e-05
ENSOCUG00000005799	CCDC110	1.89406	3.71679	3.28673e-05
ENSOCUG00000031833		1.58101	2.9918	3.29991e-05
ENSOCUG00000010707	PEAR1	1.1288	2.18677	3.30249e-05
ENSOCUG00000015737	SMPD1	1.60115	3.03386	3.38024e-05
ENSOCUG00000032755	LOC103350039	2.43195	5.39623	3.48786e-05
ENSOCUG00000032951		-5.74661	0.0186251	3.50093e-05
ENSOCUG00000025341	ADSS1	-1.58555	0.333198	3.57452e-05
ENSOCUG00000002341	CAPG	-1.10774	0.46402	3.63341e-05
ENSOCUG00000008469	MOXD1	-1.75932	0.295386	3.69771e-05
ENSOCUG00000029297	LMO3	-1.34758	0.392949	3.72436e-05
ENSOCUG00000027526		6.45568	87.7716	3.74312e-05
ENSOCUG00000005790	FAM81A	1.24253	2.36614	3.96309e-05
ENSOCUG00000003662	PLXNA1	1.25298	2.38333	4.00537e-05
ENSOCUG00000031367		-5.95157	0.0161584	4.16818e-05
ENSOCUG00000006811	NLGN3	1.05894	2.08339	4.17709e-05
ENSOCUG00000015407	GRAMD1C	-1.19242	0.437569	4.21965e-05
ENSOCUG00000007574	KLK7	1.57971	2.98909	4.29603e-05
ENSOCUG00000009583	GRIK1	-3.35916	0.0974524	4.29997e-05
ENSOCUG00000033658	PAQR5	-2.29897	0.203208	4.32292e-05
ENSOCUG00000006859	FNIP2	1.03949	2.0555	4.35013e-05
ENSOCUG00000024820	OR4E1	-6.54653	0.0106979	4.37445e-05
ENSOCUG00000014444	HDAC9	1.14839	2.21666	4.41355e-05
ENSOCUG00000017205	ISX	-5.15378	0.0280904	4.54499e-05
ENSOCUG00000002911	C16orf78	-6.86721	0.00856571	4.68684e-05
ENSOCUG00000015811	PIP5K1B	2.06578	4.18659	4.74345e-05
ENSOCUG00000012413	CATIP	-1.61543	0.326367	4.7473e-05
ENSOCUG00000032613	SLC2A13	-1.6711	0.314013	4.8118e-05
ENSOCUG00000001178	FAM78B	1.54242	2.91283	4.85619e-05
ENSOCUG00000029987		-2.27341	0.206841	4.93909e-05
ENSOCUG00000021958	RNF212B	-2.96447	0.128116	4.98482e-05
ENSOCUG00000013354	SLC1A6	-1.00087	0.499699	5.02481e-05
ENSOCUG00000038567		-2.2665	0.207833	5.03897e-05
ENSOCUG00000033841		1.53008	2.88802	5.04723e-05
ENSOCUG00000001353	UCHL1	-1.13796	0.454402	5.13386e-05
ENSOCUG00000014515	CAV2	1.56222	2.95308	5.13386e-05
ENSOCUG00000001046	IBSP	6.73056	106.194	5.13386e-05
ENSOCUG00000016518	KIAA1217	1.59217	3.01503	5.14465e-05
ENSOCUG00000008926	CNTNAP3C	-1.8807	0.271552	5.31316e-05
ENSOCUG00000004467	KCNC2	-3.58425	0.0833744	5.33926e-05
ENSOCUG00000037726		-4.58492	0.0416679	5.48376e-05
ENSOCUG00000029361		-1.39377	0.380568	5.49066e-05
ENSOCUG00000012505	LIPM	-6.57675	0.0104761	5.55176e-05
ENSOCUG00000023219	ASPG	-3.00072	0.124937	5.6256e-05
ENSOCUG00000012621		1.04723	2.06656	5.63893e-05
ENSOCUG00000015575	GABBR1	-1.2828	0.410998	5.64507e-05
ENSOCUG00000021929	CCRL2	3.3886	10.473	5.73402e-05
ENSOCUG00000025031	DNAAF4	-1.34504	0.393643	5.73402e-05
ENSOCUG00000024363		1.11685	2.16874	5.74898e-05
ENSOCUG00000038132		-2.03298	0.24435	5.88146e-05
ENSOCUG00000007620	CYP26B1	1.09885	2.14183	5.88146e-05
ENSOCUG00000021058	TMEM92	-1.45567	0.364585	5.91846e-05
ENSOCUG00000039374		-3.2865	0.102486	5.99091e-05
ENSOCUG00000037686	LOC103346855	3.67061	12.734	6.01277e-05
ENSOCUG00000001098	DTHD1	2.20342	4.60569	6.02139e-05
ENSOCUG00000006437	RUNDC3A	-1.58747	0.332754	6.02242e-05
ENSOCUG00000035463		7.30122	157.72	6.03455e-05
ENSOCUG00000029526	LOC103348242	1.06069	2.08593	6.19091e-05
ENSOCUG00000021773	OTX1	-6.08429	0.0147383	6.31035e-05
ENSOCUG00000027078		1.53344	2.89475	6.62812e-05
ENSOCUG00000038428		-2.14685	0.225806	6.66013e-05
ENSOCUG00000001063	STRA8	-4.17533	0.0553477	6.72795e-05
ENSOCUG00000000438	CD3D	6.23777	75.4669	6.75538e-05
ENSOCUG00000010894	SRSF1	-1.78167	0.290846	6.84801e-05
ENSOCUG00000003163	VCL	1.40141	2.6416	6.92936e-05
ENSOCUG00000012479	CDX1	-4.23232	0.053204	7.01528e-05
ENSOCUG00000010888	RSPO1	-3.91296	0.0663867	7.11512e-05
ENSOCUG00000003080	INSC	-1.93121	0.262209	7.24611e-05
ENSOCUG00000006791	FAM161B	1.0698	2.09915	7.35864e-05
ENSOCUG00000004490	GUCY1A2	1.55941	2.94734	7.36578e-05
DTOCUGDMRT1	DMRT1	1.24676	2.37308	7.39862e-05
ENSOCUG00000034782	OAS1	-1.05321	0.481895	7.39993e-05
ENSOCUG00000029605	LOC103347146	1.99382	3.98291	7.48776e-05
ENSOCUG00000000631	TAGAP	2.27826	4.85092	7.55388e-05
ENSOCUG00000007106		-1.19059	0.438123	7.68719e-05
ENSOCUG00000005967	NCOA2	1.07706	2.10973	7.83487e-05
ENSOCUG00000024590	LOC100357686	-1.71201	0.305235	7.86945e-05
ENSOCUG00000013284	ST18	-3.73328	0.0751917	8.03616e-05
ENSOCUG00000008179	RHBDL3	1.30612	2.47275	8.03933e-05
ENSOCUG00000004988	LOXL4	-1.65712	0.317071	8.21671e-05
ENSOCUG00000013232	COL4A1	1.21684	2.32437	8.2792e-05
ENSOCUG00000034816		-1.2274	0.427088	8.34108e-05
ENSOCUG00000023860	ADRA2B	2.70662	6.5279	8.46239e-05
ENSOCUG00000022066	LOC100341088	1.51248	2.85299	8.67208e-05
ENSOCUG00000009244	THBS4	-1.7146	0.304687	9.17016e-05
ENSOCUG00000004510	CASP10	1.49143	2.81168	9.23602e-05
ENSOCUG00000006493	STMN1	-1.2756	0.413055	9.32167e-05
ENSOCUG00000011179	TNMD	2.83624	7.14155	9.39612e-05
ENSOCUG00000002407	MFAP5	4.03997	16.4494	9.63163e-05
ENSOCUG00000006282	GCNT3	-2.06754	0.238567	9.79534e-05
ENSOCUG00000029355	LOC103345231	-1.8174	0.283731	9.79534e-05
ENSOCUG00000002614	IL1RAPL2	2.6117	6.11224	9.82523e-05
ENSOCUG00000016629	SSC4D	1.08276	2.11809	9.93212e-05
ENSOCUG00000012661	PTPRU	-1.73015	0.301421	0.000101095
ENSOCUG00000013994	PLA2G4D	4.34085	20.264	0.000101484
ENSOCUG00000004297	OTOA	-2.69156	0.154796	0.000105896
ENSOCUG00000008153	MATN1	1.47064	2.77144	0.000111992
ENSOCUG00000005848	MAEL	-2.00535	0.249075	0.000112647
ENSOCUG00000009403	PRR15	1.91736	3.7773	0.000112843
ENSOCUG00000003049	COL17A1	1.43081	2.69599	0.000113167
ENSOCUG00000004152	GDF10	1.31002	2.47946	0.000113486
ENSOCUG00000003579	TEX36	1.59648	3.02404	0.000115845
ENSOCUG00000001082	CLIP4	1.0566	2.08003	0.000115845
ENSOCUG00000016840	HDC	-1.6199	0.325358	0.000115922
ENSOCUG00000002215	BEX5	1.06623	2.09395	0.000116205
ENSOCUG00000008010	P2RX5	1.53343	2.89474	0.000116321
ENSOCUG00000012968	BHLHE22	-1.03939	0.486532	0.000116685
ENSOCUG00000033121		3.60956	12.2063	0.000120204
ENSOCUG00000004418	CREB3L1	1.78607	3.44875	0.000122808
ENSOCUG00000029466	TMEM35B	1.46904	2.76838	0.000124776
ENSOCUG00000017867	FRAS1	-1.22104	0.428975	0.000124855
ENSOCUG00000029460	PNLIPRP2	1.40193	2.64255	0.000126143
ENSOCUG00000001415	SOAT2	3.37413	10.3685	0.000127805
ENSOCUG00000000345	VXN	-2.02169	0.246269	0.000129666
ENSOCUG00000000109	ADAMTS9	1.29328	2.45084	0.00012996
ENSOCUG00000016390	CCN4	2.4678	5.53199	0.000130712
ENSOCUG00000014768	NRCAM	-1.55294	0.340814	0.00013452
ENSOCUG00000009285	C11orf53	-3.00805	0.124304	0.000137455
ENSOCUG00000026630	ITGA9	1.66061	3.16149	0.000138295
ENSOCUG00000014425	FILIP1L	1.84521	3.59304	0.000138361
ENSOCUG00000012455	MDFIC	1.04087	2.05746	0.000139361
ENSOCUG00000012863	CDHR3	-1.25185	0.41991	0.000140151
ENSOCUG00000029053		6.97489	125.792	0.000142728
ENSOCUG00000039263		-2.50395	0.176293	0.000142747
ENSOCUG00000015852	KCNQ4	1.35291	2.55427	0.000144896
ENSOCUG00000030338		2.88774	7.40113	0.000145498
ENSOCUG00000032969		-1.58758	0.332729	0.000151528
ENSOCUG00000031560	TAFA1	-4.79042	0.036136	0.000155239
ENSOCUG00000033525	LOC103349690	-1.27374	0.413587	0.000157383
ENSOCUG00000002310	TNFAIP3	1.09315	2.13339	0.000158154
ENSOCUG00000011487	DKK1	1.07408	2.10538	0.000158399
ENSOCUG00000033001		-5.97807	0.0158643	0.000159399
ENSOCUG00000010277	LOC100357271	-6.11917	0.0143862	0.000165166
ENSOCUG00000016083	TGFBR3	2.50452	5.67461	0.000165382
ENSOCUG00000006448	ABCB9	-1.06237	0.478844	0.000165482
ENSOCUG00000015865	PCDH19	1.19315	2.28651	0.00016596
ENSOCUG00000005904		-1.14782	0.451308	0.000168119
ENSOCUG00000023401	ADH4	-1.73713	0.299967	0.000170917
ENSOCUG00000002697	LOC100342847	-2.8619	0.137557	0.000170917
ENSOCUG00000025557	AGTR1	2.51378	5.71115	0.000172739
ENSOCUG00000002381	LOC100356734	1.51413	2.85626	0.00017274
ENSOCUG00000017884	VEGFC	1.11934	2.17248	0.000178955
ENSOCUG00000005623	SCN9A	-1.43772	0.36915	0.000185355
ENSOCUG00000003850		-3.69822	0.0770417	0.000187031
ENSOCUG00000001497	FABP7	-1.08499	0.471394	0.0001877
ENSOCUG00000017499	PLPPR5	1.25191	2.38157	0.000188129
ENSOCUG00000011014	P3H2	1.43664	2.70689	0.000190839
ENSOCUG00000003866	FBN1	1.2438	2.36822	0.000191271
ENSOCUG00000034344		-4.20943	0.0540551	0.000203583
ENSOCUG00000037351	KLK9	3.03197	8.17928	0.000204921
ENSOCUG00000012688	DNAH2	-1.67314	0.313571	0.000205083
ENSOCUG00000026944		-2.67964	0.15608	0.000205111
ENSOCUG00000001573	PTPRT	3.15251	8.89201	0.000205539
ENSOCUG00000031298		2.23064	4.69344	0.000207229
ENSOCUG00000001305	PHETA2	1.16541	2.24297	0.000210838
ENSOCUG00000003406	TPK1	-1.24733	0.421228	0.000217745
ENSOCUG00000022573	HLA-DMA	-1.03575	0.487764	0.00021979
ENSOCUG00000039594	HLA-DMA	-1.72443	0.302618	0.00021979
ENSOCUG00000001890	MROH6	-2.29684	0.203509	0.000220369
ENSOCUG00000012977	C11orf52	-2.21517	0.215361	0.000224534
ENSOCUG00000016101	MMP9	1.30043	2.46303	0.000224667
ENSOCUG00000005522	TRIM55	6.19695	73.3617	0.000225093
ENSOCUG00000029586	PLA2G2C	2.97857	7.88202	0.000231464
ENSOCUG00000003660	CCR2	-1.37669	0.3851	0.000234013
ENSOCUG00000032741		-3.06133	0.119798	0.000237413
ENSOCUG00000014354	CSMD1	-3.6762	0.0782265	0.000239723
ENSOCUG00000036976		-6.36301	0.0121491	0.000242707
ENSOCUG00000009840	SLC46A2	-1.72226	0.303074	0.000245977
ENSOCUG00000016254	STAB2	3.33472	10.0891	0.000247366
ENSOCUG00000005766	ITPR3	1.27177	2.41458	0.000247753
ENSOCUG00000017021	SLC30A3	1.62995	3.09503	0.000251264
ENSOCUG00000001136	TMEM204	1.36523	2.57618	0.000255056
ENSOCUG00000003541	SLC25A53	-1.40482	0.377665	0.000256037
ENSOCUG00000029452	LOC100352291	-2.93468	0.13079	0.000259448
ENSOCUG00000008274	PROX1	1.56086	2.95029	0.000261677
ENSOCUG00000014475	KCNA4	1.92569	3.79918	0.000262844
ENSOCUG00000001228	EHD3	2.30668	4.94743	0.000264082
ENSOCUG00000006182	TAC1	-5.06776	0.0298161	0.000264493
ENSOCUG00000038017		-2.14403	0.226247	0.00026699
ENSOCUG00000011700	VWA2	-1.03908	0.486637	0.00027
ENSOCUG00000012683	ADAM33	2.1643	4.48248	0.00027362
ENSOCUG00000009976	HTR2A	-2.70917	0.152918	0.000284651
ENSOCUG00000031568	LOC103350038	2.13388	4.38897	0.000289201
ENSOCUG00000007056	TNXB	1.39611	2.63192	0.000295343
ENSOCUG00000021846		-3.69404	0.077265	0.000296822
ENSOCUG00000004863	IQSEC3	3.06708	8.38074	0.000297373
ENSOCUG00000036851		-2.42518	0.186186	0.000299755
ENSOCUG00000033796		2.81123	7.01882	0.000299755
ENSOCUG00000012989	ADAD1	-1.43787	0.369111	0.000303629
ENSOCUG00000008386	GPA1	-3.61152	0.0818136	0.00030433
ENSOCUG00000029652	MYH4	-3.41883	0.093504	0.00030492
ENSOCUG00000001891	GPAT2	-1.65268	0.318048	0.000306674
ENSOCUG00000024434	LOC100346274	1.20078	2.29865	0.000307028
ENSOCUG00000015922	RNASEL	1.0588	2.0832	0.000307666
ENSOCUG00000039234		3.10103	8.58031	0.00030785
ENSOCUG00000016259	DDIT4L	-1.35153	0.391875	0.000309333
ENSOCUG00000015875	RFTN1	1.68567	3.21691	0.000310163
ENSOCUG00000027797	PRDM11	1.29741	2.45787	0.000312725
ENSOCUG00000005137	ABCA3	1.46093	2.75285	0.000312872
ENSOCUG00000000718	SLC1A2	-3.42908	0.0928416	0.000313121
ENSOCUG00000025350	LOC100349163	-4.45444	0.0456121	0.000319774
ENSOCUG00000034606		-5.5416	0.0214691	0.000320788
ENSOCUG00000016105	COLQ	-2.08409	0.235844	0.000322278
ENSOCUG00000011296	GLB1L3	3.63872	12.4555	0.000322817
ENSOCUG00000027576	FSD1	-1.81596	0.284014	0.000324668
ENSOCUG00000012839	ALS2CL	1.02293	2.03204	0.000326236
ENSOCUG00000025992		-4.10203	0.0582327	0.000328043
DTOCUGDMRTB1	DMRTB1	-1.85101	0.277199	0.000328849
ENSOCUG00000003217	COL23A1	1.172	2.25323	0.000329019
ENSOCUG00000016043	PLA2G12B	-5.874	0.017051	0.00033345
ENSOCUG00000001616	PCSK5	1.11939	2.17256	0.000338061
ENSOCUG00000007302	CILP	1.12494	2.18093	0.000338692
ENSOCUG00000007663	MRO	-1.11897	0.460422	0.000344927
ENSOCUG00000021468	BARX2	-3.2261	0.106868	0.000349295
ENSOCUG00000026233	PLAAT2	-2.36147	0.194593	0.000352115
ENSOCUG00000011018	STARD9	1.2896	2.44459	0.000352115
ENSOCUG00000007232	HSD17B13	-2.96059	0.128462	0.000354451
ENSOCUG00000010820	MAML2	1.09558	2.13699	0.000354666
ENSOCUG00000037275		-1.08508	0.471367	0.000356023
ENSOCUG00000032667		2.00655	4.01819	0.000356965
ENSOCUG00000013194	PPARG	2.30479	4.94095	0.000357818
ENSOCUG00000039321	LOC103346424	6.28	77.7087	0.000358931
ENSOCUG00000003531	B4GALNT2	-2.10972	0.231692	0.000361016
ENSOCUG00000005481		1.69297	3.23322	0.000365057
ENSOCUG00000001316	ESRP1	-1.26639	0.4157	0.000365924
ENSOCUG00000030888	C5orf58	-2.58419	0.166756	0.000367275
ENSOCUG00000009843	SPOCK1	1.04741	2.06681	0.000374326
ENSOCUG00000032458		5.78445	55.118	0.000375424
ENSOCUG00000032550		-5.316	0.025103	0.000376615
ENSOCUG00000030185		-5.79067	0.0180648	0.000376999
ENSOCUG00000005396	PINLYP	2.42403	5.36669	0.000382993
ENSOCUG00000022791	ART1	4.20673	18.4651	0.000393313
ENSOCUG00000025061	CCL24	4.78392	27.5489	0.000395398
ENSOCUG00000009466	HEPHL1	-2.3211	0.200115	0.000395398
ENSOCUG00000025701	CRHR1	-1.55429	0.340495	0.000395542
ENSOCUG00000015548	PEAK1	1.06377	2.09039	0.000407865
ENSOCUG00000017564	ENTPD8	-1.90786	0.266487	0.000408485
ENSOCUG00000029826		1.17658	2.26041	0.000411236
ENSOCUG00000013078	FAXDC2	1.01305	2.01818	0.00041154
ENSOCUG00000014292	TC2N	1.41975	2.67539	0.000412086
ENSOCUG00000004852	MALL	1.85399	3.61499	0.000430055
ENSOCUG00000008369	MORC1	-2.97991	0.126753	0.000447357
ENSOCUG00000002466	STAT4	-1.20816	0.43282	0.000448532
ENSOCUG00000038517	KCNJ9	-4.72666	0.0377689	0.000462003
ENSOCUG00000004037	SYCP2	-1.51387	0.350171	0.000469429
ENSOCUG00000011107	TMEM163	-1.18501	0.439823	0.000472172
ENSOCUG00000013675	FGL2	1.92158	3.78837	0.000472822
ENSOCUG00000037720	FKBP1B	-1.26426	0.416313	0.000473493
ENSOCUG00000006190	NCAM1	1.2068	2.30826	0.000483438
ENSOCUG00000022530	ACVRL1	1.51381	2.85563	0.000484441
ENSOCUG00000009253	ASL	1.20664	2.308	0.000493276
ENSOCUG00000033314		3.67026	12.7309	0.000495097
ENSOCUG00000039326		2.20153	4.59967	0.000495097
ENSOCUG00000003535	CP	-1.90381	0.267237	0.000496832
ENSOCUG00000030067		1.42327	2.68193	0.000499913
ENSOCUG00000024939	IFIT2	1.40715	2.65213	0.000499913
ENSOCUG00000010357	MBOAT1	1.4881	2.8052	0.000505331
ENSOCUG00000006341	CALB1	2.73531	6.65901	0.000505561
ENSOCUG00000038328	CELA3A	-1.08177	0.472448	0.000505561
ENSOCUG00000032619	TRIM60	-1.67583	0.312987	0.000507316
ENSOCUG00000034154		1.2615	2.39745	0.000509888
ENSOCUG00000025327	TDRD1	-1.20641	0.433347	0.000510654
ENSOCUG00000030919	SMIM5	4.57905	23.9018	0.000514246
ENSOCUG00000038430	NSG2	-1.38963	0.381662	0.000514792
ENSOCUG00000011691	STK17B	1.43996	2.71314	0.00051481
ENSOCUG00000012400	PTH1R	1.3949	2.62971	0.000516837
ENSOCUG00000014668	PPARGC1A	1.15192	2.22209	0.00051693
ENSOCUG00000009245	TRPC5	-1.94667	0.259413	0.000518001
ENSOCUG00000012113		-1.99567	0.250752	0.000530402
ENSOCUG00000033218		-5.71593	0.0190253	0.000532608
ENSOCUG00000035827		-5.83406	0.0175296	0.000536528
ENSOCUG00000005141	CHST11	1.19613	2.29125	0.000537194
ENSOCUG00000004579	NRP1	1.38109	2.60465	0.000539545
ENSOCUG00000005947	SCEL	1.11192	2.16133	0.000541671
ENSOCUG00000007567	SLC38A11	2.07271	4.20676	0.000542137
ENSOCUG00000003917	COL24A1	-1.34193	0.394493	0.000544722
ENSOCUG00000014198	CAT	1.0039	2.00542	0.000548112
ENSOCUG00000017310	SLC6A2	-1.75497	0.296279	0.000558717
ENSOCUG00000007870	SCN5A	1.84116	3.58298	0.000560013
ENSOCUG00000032490	CYBB	1.31565	2.48915	0.000562005
ENSOCUG00000008998	KCNJ14	-1.13303	0.455956	0.000569061
ENSOCUG00000005739	HCRTR1	2.50316	5.66926	0.000586151
ENSOCUG00000015352	ENHO	1.10561	2.1519	0.000590919
ENSOCUG00000015981	DGKH	1.1013	2.14548	0.000605876
ENSOCUG00000003120	OPRK1	1.46214	2.75516	0.000606273
ENSOCUG00000008779	SPINK5	-2.20333	0.217135	0.000615135
ENSOCUG00000037085		3.95	15.455	0.000624307
ENSOCUG00000019159	MIR199A2	1.38834	2.61777	0.000628183
ENSOCUG00000009929	C14H3orf52	-2.38772	0.191084	0.000633659
ENSOCUG00000031605		1.18069	2.26685	0.000641337
ENSOCUG00000014826	CLTB	1.16284	2.23898	0.000644159
ENSOCUG00000037163		-5.58173	0.02088	0.000645729
ENSOCUG00000005590	CBLB	1.19959	2.29675	0.000646064
ENSOCUG00000012157	RSAD2	-1.44695	0.366796	0.000651274
ENSOCUG00000000391	WFIKKN2	1.36401	2.574	0.00065199
ENSOCUG00000019225	MIR31	-1.41908	0.37395	0.000663777
ENSOCUG00000000894	LSMEM1	-3.97694	0.0635068	0.000685746
ENSOCUG00000033787		1.07319	2.10408	0.000693833
ENSOCUG00000005180		3.16291	8.95634	0.000703109
ENSOCUG00000005061	LOC100338194	2.10396	4.29886	0.000722201
ENSOCUG00000013482	CYTL1	1.63349	3.10263	0.00072827
ENSOCUG00000025022	NUPR1	2.51462	5.71447	0.000740738
ENSOCUG00000021033		2.32005	4.99349	0.000759369
ENSOCUG00000007797	CCKBR	-3.69026	0.0774679	0.000760025
ENSOCUG00000008104	GDF6	2.59129	6.02637	0.000763771
ENSOCUG00000004651	TESMIN	-3.50009	0.0883829	0.000770358
ENSOCUG00000015043	LOC100340535	-1.41515	0.374971	0.000777709
ENSOCUG00000010149	IL12A	-1.04129	0.485894	0.000777971
ENSOCUG00000006258	WDR72	-1.12392	0.458845	0.000783637
ENSOCUG00000000495	IL26	-5.91321	0.0165938	0.000784174
ENSOCUG00000021619	MAFB	2.68851	6.44648	0.000806969
ENSOCUG00000005248	ZNF804A	1.7829	3.44117	0.000818243
ENSOCUG00000037118		-1.31407	0.402186	0.000824471
ENSOCUG00000006790	DPPA5	-1.79386	0.288399	0.00083492
ENSOCUG00000002868	GCA	1.2709	2.41311	0.000846028
ENSOCUG00000001103	CASP1	-1.81076	0.28504	0.000853333
ENSOCUG00000034457		1.10548	2.15171	0.000857777
ENSOCUG00000017853	SOHLH2	-2.25624	0.209317	0.000860733
ENSOCUG00000007194	CSMD2	1.28677	2.4398	0.000872372
ENSOCUG00000003734	TRPM6	-1.02149	0.492608	0.000874681
ENSOCUG00000004997	MST1	1.36317	2.57251	0.000880065
ENSOCUG00000014040	ENDOD1	1.79452	3.46899	0.000903152
ENSOCUG00000022123		1.514	2.856	0.000911306
ENSOCUG00000015320	COL12A1	2.74822	6.71889	0.000927947
ENSOCUG00000005990	GASK1A	-1.46525	0.362174	0.00095437
ENSOCUG00000029470		-2.48282	0.178894	0.000954393
ENSOCUG00000032778		3.472	11.0963	0.000955347
ENSOCUG00000014502	MC2R	4.49891	22.6103	0.000956453
ENSOCUG00000023232	NME5	-2.2569	0.209221	0.000956453
ENSOCUG00000017770	PIR	1.00338	2.00469	0.000956608
ENSOCUG00000004066	LZTS3	1.05211	2.07356	0.000962405
ENSOCUG00000000585	RRAD	1.15682	2.22966	0.000979406
ENSOCUG00000003953	C1orf146	-2.2655	0.207977	0.00103839
ENSOCUG00000015234	COL14A1	1.99084	3.9747	0.00105778
ENSOCUG00000024082	ANHX	-1.43081	0.370922	0.00106108
ENSOCUG00000010933	POU3F3	-1.55158	0.341136	0.00107381
ENSOCUG00000013013	L3MBTL4	1.09606	2.1377	0.00108617
ENSOCUG00000002660	CALHM5	-1.58302	0.333782	0.00108631
ENSOCUG00000028074	DHRS2	1.88912	3.70409	0.00109218
ENSOCUG00000001158	ELL3	2.28809	4.88409	0.00110644
ENSOCUG00000001802	COPZ2	1.32125	2.49883	0.00110767
ENSOCUG00000015159	EVX1	-1.88478	0.270785	0.00112715
ENSOCUG00000017803		-1.85537	0.276361	0.00113477
ENSOCUG00000000927	ADAMTSL4	-1.16543	0.445831	0.00114906
ENSOCUG00000025295	NTF4	1.29257	2.44963	0.00115142
ENSOCUG00000001029	CDH17	1.80602	3.49675	0.00115142
ENSOCUG00000036279		1.91633	3.77461	0.00115436
ENSOCUG00000009592	COL19A1	3.72992	13.2684	0.00116384
ENSOCUG00000015111	GRIN2B	-1.95363	0.258166	0.00116921
ENSOCUG00000009437	TMC1	-2.04914	0.241628	0.00117851
ENSOCUG00000038847		6.42194	85.7427	0.00118313
ENSOCUG00000013056	ZNF804B	3.84453	14.3654	0.00118468
ENSOCUG00000004745	C14orf39	-1.27123	0.414307	0.00119059
ENSOCUG00000009206	LOC100343422	-1.41885	0.37401	0.00120171
ENSOCUG00000000533	RPP25	1.50234	2.83301	0.00121657
ENSOCUG00000029286	LOC100344331	-3.97375	0.0636478	0.00121729
ENSOCUG00000009047	FCRL2	-2.12535	0.229195	0.0012218
ENSOCUG00000015848	LOC100338346	-2.4645	0.181181	0.00123856
ENSOCUG00000039206		1.11799	2.17045	0.00124828
ENSOCUG00000007362	PRKCA	1.0205	2.02862	0.00127114
ENSOCUG00000002626	LMO1	-1.32107	0.400238	0.0012878
ENSOCUG00000013813	IL33	1.98733	3.96501	0.00129117
ENSOCUG00000011768	FRMPD2	-2.15591	0.224392	0.00131948
ENSOCUG00000022385	LOC103347221	1.51361	2.85524	0.00132146
ENSOCUG00000014596	LOXL2	1.15624	2.22876	0.00132792
ENSOCUG00000038033		-2.28117	0.20573	0.00133855
ENSOCUG00000024179		1.70177	3.25301	0.00134306
ENSOCUG00000026618	LOC100357811	-1.19221	0.437633	0.0013605
ENSOCUG00000001462	INSYN2A	-4.4132	0.0469348	0.00136565
ENSOCUG00000022094	C1QTNF5	2.59289	6.03306	0.00138509
ENSOCUG00000015387		1.03055	2.04281	0.00138528
ENSOCUG00000012702	SIGLEC1	1.06535	2.09268	0.00138859
ENSOCUG00000005910	CCDC36	1.9255	3.79868	0.00140122
ENSOCUG00000035706		-5.80349	0.017905	0.00142631
ENSOCUG00000017466	BRDT	-1.26727	0.415445	0.00144052
ENSOCUG00000003146	QRICH2	3.12135	8.70203	0.00144542
ENSOCUG00000017910	ZFHX3	1.04295	2.06044	0.00145275
ENSOCUG00000005336	ABI3BP	2.80777	7.00204	0.00146108
ENSOCUG00000009880	DUSP14	-1.2502	0.42039	0.00148461
ENSOCUG00000009939	MYPN	2.87333	7.32753	0.0014951
ENSOCUG00000028055	LOC100358544	-1.61956	0.325434	0.00150314
ENSOCUG00000001230	XDH	-1.08789	0.470448	0.00151097
ENSOCUG00000013224	LHFPL4	-3.6673	0.0787104	0.00151926
ENSOCUG00000005382	ZNF575	1.2695	2.41078	0.00151926
ENSOCUG00000015962	ASZ1	-1.71015	0.305629	0.00152603
ENSOCUG00000027080	NRIP2	1.56293	2.95454	0.00154703
ENSOCUG00000012283	CYP7A1	1.03772	2.05298	0.00154703
ENSOCUG00000034104		-5.50966	0.0219496	0.00154703
ENSOCUG00000034029		-1.68834	0.310283	0.00154935
ENSOCUG00000023063	LOC100338404	1.0336	2.04713	0.00157255
ENSOCUG00000023102	LOC100349173	1.32388	2.50338	0.00157565
ENSOCUG00000033745	LOC103346024	-1.01949	0.49329	0.00158666
ENSOCUG00000011869	ELMOD1	-1.22704	0.427193	0.00160178
ENSOCUG00000015927	CITED4	1.55971	2.94794	0.00160252
ENSOCUG00000007303	CHRNA10	2.89352	7.43083	0.00161839
ENSOCUG00000009781	SNX31	4.20391	18.4291	0.00164275
ENSOCUG00000006995	RAG2	-2.52951	0.173198	0.0016615
ENSOCUG00000022616	LOC103345097	4.89648	29.7842	0.00166387
ENSOCUG00000009330	FMO5	1.09504	2.13619	0.0016885
ENSOCUG00000005346	TDRD15	-1.36279	0.38883	0.00169042
ENSOCUG00000021148	SHISA9	-1.03348	0.48853	0.00170692
ENSOCUG00000003905	CCN1	1.16903	2.24861	0.00171476
ENSOCUG00000024437		1.30511	2.47103	0.00174504
ENSOCUG00000000378	SPO11	-1.06566	0.477752	0.00175394
ENSOCUG00000006524	BMF	1.21591	2.32288	0.00179657
ENSOCUG00000000569	TERB1	-2.64846	0.159491	0.00179785
ENSOCUG00000028210	LOC103351868	-1.49014	0.355979	0.00181183
ENSOCUG00000039008		-2.4537	0.182542	0.00181317
ENSOCUG00000008865	THSD7A	2.29138	4.89525	0.00182749
ENSOCUG00000030668		1.26465	2.40268	0.00183168
ENSOCUG00000001554	TANC2	1.17355	2.25567	0.0018346
ENSOCUG00000013451	RLN3	2.30649	4.94678	0.00184915
ENSOCUG00000005451	ZNF641	-1.32422	0.399364	0.00185321
ENSOCUG00000022068	GBX2	-5.1537	0.0280919	0.00187496
ENSOCUG00000013057	GBX2	-2.50369	0.176325	0.00187496
ENSOCUG00000007281	HCN4	-1.19284	0.437441	0.0018767
ENSOCUG00000032017		-4.18659	0.0549174	0.00188029
ENSOCUG00000014419	PKD2L2	-1.50417	0.352533	0.00192124
ENSOCUG00000012615	BMPER	-2.06818	0.23846	0.00192124
ENSOCUG00000025135		-1.1416	0.453256	0.0019263
ENSOCUG00000012541	SOSTDC1	1.87722	3.67365	0.00194025
ENSOCUG00000035633		1.34639	2.54274	0.00194907
ENSOCUG00000002687	TMEM225	-3.78037	0.0727773	0.00199102
ENSOCUG00000024119	GPR183	1.82148	3.53443	0.0020027
ENSOCUG00000017197	CLDN6	-1.22703	0.427197	0.0020045
ENSOCUG00000027882		-1.7	0.307786	0.00200657
ENSOCUG00000000534	LCP2	1.60746	3.04715	0.00200885
ENSOCUG00000000431	CRABP1	3.08489	8.48484	0.00201034
ENSOCUG00000002111	FOXB2	-4.70096	0.0384476	0.00204274
ENSOCUG00000023958	IL1B	-3.73656	0.0750209	0.0020473
ENSOCUG00000010941	CPXM2	3.82616	14.1836	0.00204775
ENSOCUG00000031777		2.78056	6.87119	0.00207257
ENSOCUG00000006930	SPHKAP	2.42353	5.36484	0.00207563
ENSOCUG00000035541		1.27148	2.4141	0.00208411
ENSOCUG00000027250	SYNGR2	1.10488	2.15081	0.00209705
ENSOCUG00000031636		-1.7856	0.290055	0.00210636
ENSOCUG00000017330	DAW1	-2.17844	0.220915	0.00213623
ENSOCUG00000011674	BMP2	1.71939	3.29297	0.00213628
ENSOCUG00000001235	ADAM19	1.03967	2.05576	0.00213628
ENSOCUG00000002425	RYR2	-1.25386	0.419324	0.00214875
ENSOCUG00000017412	RHCG	1.17406	2.25646	0.00216666
ENSOCUG00000037983		2.18684	4.55306	0.00217451
ENSOCUG00000000448	LRRC55	2.15165	4.44337	0.00218168
ENSOCUG00000030078		-2.49127	0.17785	0.00220499
ENSOCUG00000011655	COL13A1	1.11368	2.16397	0.00220499
ENSOCUG00000011455	PTPRQ	-1.10712	0.46422	0.00221646
ENSOCUG00000027044	TNFRSF25	-1.02026	0.493029	0.00221701
ENSOCUG00000031053		-5.38612	0.023912	0.00222212
ENSOCUG00000012527	SLC26A7	1.02255	2.03151	0.00222349
ENSOCUG00000004590	COL27A1	1.14749	2.21528	0.00223983
ENSOCUG00000023359	TINAGL1	1.09469	2.13567	0.00225426
ENSOCUG00000027867	LOC100350700	3.69294	12.9326	0.00225617
ENSOCUG00000024640		-1.26385	0.416432	0.00228948
ENSOCUG00000030327	MYOCOS	-5.39194	0.0238158	0.00231742
ENSOCUG00000017764	VEGFD	1.04235	2.05958	0.00232273
ENSOCUG00000003616		1.99713	3.99205	0.00233959
ENSOCUG00000002613	VCAN	1.04337	2.06103	0.00235064
ENSOCUG00000017480	GAD2	-3.9014	0.0669208	0.00237654
ENSOCUG00000000660	TBXT	-4.49917	0.0442195	0.0024033
ENSOCUG00000035512		-5.16927	0.0277905	0.00240565
ENSOCUG00000033948		5.75884	54.1481	0.00242149
ENSOCUG00000016836	GPX5	-1.24035	0.42327	0.00242291
ENSOCUG00000032975		1.70047	3.25006	0.0024231
ENSOCUG00000007604	AMER2	1.84297	3.58748	0.00242477
ENSOCUG00000013819	RPS6KL1	1.16091	2.23599	0.002431
ENSOCUG00000029659	PASD1	-1.09736	0.467372	0.00243353
ENSOCUG00000029880		-5.20772	0.0270596	0.00246003
ENSOCUG00000021172	HIP1R	-1.12184	0.459509	0.00248088
ENSOCUG00000023252		1.06468	2.09171	0.0025638
ENSOCUG00000038632		-1.71784	0.304003	0.00257983
ENSOCUG00000008146	RBP2	-3.95434	0.0645096	0.00259884
ENSOCUG00000024350	TMEM200C	1.12155	2.17581	0.00260292
ENSOCUG00000012125	SERTM1	2.68501	6.43086	0.00261652
ENSOCUG00000005589	ZAN	-1.21221	0.431607	0.00261652
ENSOCUG00000033175		-1.69487	0.308882	0.00264526
ENSOCUG00000022014	NOTCH3	1.08167	2.11649	0.00264604
ENSOCUG00000034847		-1.04039	0.486197	0.00265731
ENSOCUG00000004238	PERP	-1.90715	0.26662	0.00266465
ENSOCUG00000009198	ERMN	6.22214	74.6534	0.0027198
ENSOCUG00000005371	THBS2	2.22856	4.68665	0.00272077
ENSOCUG00000009172	IRX2	-2.47353	0.18005	0.00272773
ENSOCUG00000023070	ZYG11A	-1.00017	0.49994	0.00276395
ENSOCUG00000039392		4.87754	29.3958	0.0027686
ENSOCUG00000001021		-5.07165	0.0297359	0.00276983
ENSOCUG00000016704	GXYLT2	-1.17162	0.443923	0.00278237
ENSOCUG00000011729	BRINP3	2.5452	5.8369	0.00279002
ENSOCUG00000033083		5.17878	36.2216	0.00281048
ENSOCUG00000016944	BVES	1.24087	2.36341	0.00282876
ENSOCUG00000023106	SUN3	-1.28427	0.410578	0.00282876
ENSOCUG00000003896	CAPS2	-1.11914	0.460369	0.00283099
ENSOCUG00000021042		3.43003	10.7781	0.00286253
ENSOCUG00000016234	SVOP	-4.68285	0.0389334	0.00286485
ENSOCUG00000029685	ZPBP2	-2.99575	0.125369	0.00286954
ENSOCUG00000008008		-5.17511	0.0276781	0.00288539
ENSOCUG00000014857	COL5A3	3.3493	10.1916	0.00290453
ENSOCUG00000029328	OASL	-1.81053	0.285087	0.00291572
ENSOCUG00000023182	ARHGEF10L	1.57584	2.98108	0.00294401
ENSOCUG00000012041	HNF4G	-1.81286	0.284627	0.00297857
ENSOCUG00000033468		-1.96318	0.256462	0.00298397
ENSOCUG00000035732		1.11462	2.16537	0.00298458
ENSOCUG00000009909	PHYHIP	-1.67418	0.313345	0.00301354
ENSOCUG00000039363		6.01038	64.4622	0.00304354
ENSOCUG00000013555	PPP1R1A	-1.20631	0.433376	0.00305341
ENSOCUG00000009897	ADM	-1.0002	0.499929	0.00312512
ENSOCUG00000016181	MYO15B	1.88601	3.69613	0.00312512
ENSOCUG00000011881	RGS7	1.03669	2.05152	0.00313524
ENSOCUG00000010123	CD9	1.16471	2.24189	0.0031942
ENSOCUG00000033666		1.45964	2.7504	0.0031942
ENSOCUG00000011508		1.72182	3.29853	0.00320661
ENSOCUG00000020966		-1.19221	0.437633	0.00321317
ENSOCUG00000006877	TFCP2L1	-1.22663	0.427314	0.00322741
ENSOCUG00000025016	XKR7	4.9891	31.7592	0.00328819
ENSOCUG00000032665		-1.12306	0.45912	0.00328905
ENSOCUG00000015782	ACTL7B	1.27765	2.42444	0.00332658
ENSOCUG00000005879	P2RY14	-1.60841	0.32796	0.00333019
ENSOCUG00000007888	GABRQ	1.2544	2.38568	0.00335745
[truncated: 570 more rows]
