# Supplementary material for: DMRT1 is a testis-determining gene in rabbits and is also essential for female fertility
Source: eLife. 2023 Oct 17;12:RP89284. doi: 10.7554/eLife.89284 (PMC10581690; doi:10.7554/eLife.89284)
Supplement: Supplementary file 2. — Cluster membership of the 3460 DEGs with their expression data (TPM) according to the four genotypes (XY control, XY DMRT1−/−, XX DMRT1−/−, XX control). [file elife-89284-supp2.xlsx]

## Sheet: TPM
Supplementary File 2: Clustering and expression values (TPM,Transcripts per million) of the 3460 DEGs
Geneid	Cluster number	XY Control			XY DMRT1-/-			XX DMRT1-/-			XX Control			Gene name
DTOCUGAMH	1	574.859	878.802	977.958	3.0698	5.13766	3.72726	2.95815	1.89908	2.03938	2.02397	2.23565	3.28194	AMH
DTOCUGHSD3Balpha	1	41.5388	30.8763	74.1561	0.147586	0.122573	0.0812844	0.152625	0.148788	0.29037	0.128444	0	0.121091	HSD3Balpha
DTOCUGHSD3Bbeta	1	419.326	446.536	262.928	0.10652	0.0786368	0.195555	0.514063	0.107387	0.0798373	0.0824034	0.0367023	0	HSD3Bbeta
ENSOCUG00000000055	1	0.226224	0.164126	0.235361	0	0.0292328	0.0290787	0.0273	0.0266137	0.0890373	0.122532	0.191014	0.0866383	PPP1R32
ENSOCUG00000000098	1	4.29685	4.36627	7.52827	1.662	2.07567	2.2712	1.96428	8.3399	2.47264	2.98713	3.83638	2.14628	SLC16A1
ENSOCUG00000000162	1	17.2236	14.1813	13.8116	5.17271	7.38433	6.86486	5.67157	6.4086	5.32502	9.9799	8.89005	8.04504	LRRC51
ENSOCUG00000000171	1	76.43	85.9703	82.4463	7.40433	6.0873	6.44359	7.19305	8.11092	7.11718	8.94531	12.0769	9.4852	GREM2
ENSOCUG00000000174	1	24.188	21.533	24.9266	8.04612	7.06763	7.92999	5.8496	8.47758	8.53583	13.0222	10.4902	9.28204	EXOC6
ENSOCUG00000000371	1	20.0125	21.9846	16.137	6.40649	9.07589	7.09628	7.88363	7.25246	6.599	7.18488	8.657	6.53867
ENSOCUG00000000391	1	23.786	22.0112	18.6951	6.40722	13.5347	4.63462	5.73258	6.91099	5.49472	12.8463	6.62299	4.91789	WFIKKN2
ENSOCUG00000000409	1	293.221	312.21	270.69	55.4671	64.5871	47.1574	58.3762	58.8445	65.4014	167.721	111.332	97.8222
ENSOCUG00000000438	1	6.47765	4.72142	1.97029	0.140632	0.15573	0.154909	0.145433	0.141777	0.158107	0	0.145368	0
ENSOCUG00000000531	1	58.4586	69.8131	53.9038	20.8813	25.5415	21.8569	22.5032	20.4338	24.4942	36.9022	30.5322	30.6523
ENSOCUG00000000535	1	0.696026	0.755825	0.533928	0.104802	0.208895	0.230882	0.195084	0.316966	0.164955	0.41348	0.411659	0.435671	ADTRP
ENSOCUG00000000560	1	37.7584	38.074	38.3742	4.91926	9.27658	8.45358	7.79808	6.85983	7.95093	12.944	7.94447	7.07774	HEYL
ENSOCUG00000000566	1	27.3231	25.1765	26.6465	10.2833	11.7341	10.3117	12.2234	13.1197	11.4083	13.558	12.7678	8.92859	XPR1
ENSOCUG00000000585	1	10.6623	15.6774	10.6566	3.72184	8.53034	4.7035	3.55054	5.17739	2.98417	4.95492	5.01028	5.77597	RRAD
ENSOCUG00000000611	1	160.117	178.235	165.422	64.4073	79.2952	75.0838	81.4772	67.2884	76.3761	108.256	106.639	94.3877	FKBP1
ENSOCUG00000000621	1	11.0528	16.5099	9.80646	1.60623	7.89767	1.88468	3.13256	2.9394	2.50264	7.00976	5.70285	5.07096	INHBA
ENSOCUG00000000650	1	22.2158	22.0624	22.9803	8.15453	14.9077	9.31241	9.60602	9.32138	10.6356	10.1331	9.00436	9.48276	RERG
ENSOCUG00000000651	1	72.8535	77.212	70.9966	12.7431	18.2236	17.5059	19.8991	12.6634	16.0868	22.2018	23.3149	17.127	LDLR
ENSOCUG00000000670	1	44.918	38.6919	38.108	0.927521	1.49095	0.790978	1.16031	1.52327	1.48007	1.57972	1.91751	1.342	SLITRK6
ENSOCUG00000000672	1	28.5126	23.9079	21.2169	8.54626	13.246	6.68132	9.1197	11.3839	11.0896	12.2746	9.48083	7.82737	EPHA7
ENSOCUG00000000674	1	4.84143	3.79407	3.08474	0.743747	2.2596	0.609186	0.532481	0.538321	0.750406	0.995818	0.197127	0.208625	KCNA5
ENSOCUG00000000706	1	55.1279	57.1079	46.4156	2.69664	7.58235	3.15662	4.77315	3.75832	3.39287	3.30574	3.70495	2.78358	FHOD3
ENSOCUG00000000715	1	11.6715	10.6947	8.87634	1.17907	2.36649	1.54229	1.79633	1.7724	2.17775	1.68581	0.903202	0.679485	CD44
ENSOCUG00000000721	1	10.198	10.6377	7.90677	2.28135	1.72466	1.03901	1.92823	2.4105	2.51551	3.13091	3.12912	2.35175	PAMR1
ENSOCUG00000000724	1	77.0323	95.7884	95.5296	18.3978	45.8308	19.0009	20.5479	11.2473	19.4925	23.2615	20.3257	22.574	SLC7A7
ENSOCUG00000000736	1	4.60907	3.69796	3.65352	0.938596	2.7327	1.39399	1.91947	1.64795	1.56506	2.3129	2.07122	1.10756	ADAM11
ENSOCUG00000000744	1	9.32666	8.48378	7.5416	2.7722	5.51373	3.37974	3.85493	3.44599	2.32994	3.95079	2.60126	2.0905	PLTP
ENSOCUG00000000778	1	23.7671	22.9972	19.5909	6.60267	6.41036	7.51063	8.77898	7.12879	7.08351	9.24271	9.5971	7.17592	DENND5B
ENSOCUG00000000798	1	23.7785	21.7534	16.165	8.53271	8.68115	9.16259	10.821	9.75028	8.12715	13.0039	10.2702	7.74568	H6PD
ENSOCUG00000000802	1	73.4924	74.4175	67.9015	14.9552	19.9001	24.2292	26.4584	20.7584	17.5653	19.6657	20.0429	17.1517	WIPF3
ENSOCUG00000000821	1	40.904	47.5228	34.243	14.0467	18.1379	19.9012	21.5926	14.6281	15.9595	23.2688	22.5235	22.0273
ENSOCUG00000000827	1	40.8983	39.9028	40.5791	15.7236	17.1244	15.5212	19.2006	19.909	19.416	24.7101	23.1932	18.0523	SLMAP
ENSOCUG00000000828	1	41.5695	31.2485	23.5253	12.359	18.4063	14.0558	18.195	14.54	14.3015	27.1672	19.1979	11.0773	FLNB
ENSOCUG00000000832	1	23.4337	23.6641	22.3334	10.4745	13.5828	14.6487	12.5322	11.091	10.4966	10.8829	9.82515	9.66045	ABHD6
ENSOCUG00000000861	1	34.4458	37.9003	28.825	9.06787	16.9606	9.14905	9.77148	18.2066	10.5373	12.8213	13.863	9.50318	CD82
ENSOCUG00000000863	1	12.5075	12.5603	12.9485	3.64478	5.37662	5.39128	6.60959	4.33062	4.39038	10.1052	9.17661	6.02364	ASTN2
ENSOCUG00000000875	1	5.46334	5.47707	3.79829	1.16969	1.5053	0.684843	1.36219	1.21109	1.23211	1.32062	0.925873	1.09516	FAM124A
ENSOCUG00000000934	1	59.9415	75.6149	63.6929	17.8931	23.0384	16.9204	22.7372	13.912	13.8538	17.0414	20.2405	12.7881	LRRC4B
ENSOCUG00000000960	1	14.0753	10.2958	8.56708	2.31327	2.00091	2.36219	3.00314	2.63738	2.74582	4.09559	3.45848	1.86812	SDK2
ENSOCUG00000000968	1	95.4086	139.664	98.8676	38.1314	70	38.0619	40.127	29.8971	41.0416	50.0027	43.5967	42.5152	DES
ENSOCUG00000000972	1	18.2663	15.1631	14.0075	5.01457	2.34263	1.98506	5.66458	4.89025	3.20323	8.34813	8.8796	2.96887	SORCS1
ENSOCUG00000000974	1	5.74127	4.99194	5.11327	1.46927	3.71232	1.34489	1.21983	1.04312	1.11674	1.80099	1.68988	1.19984
ENSOCUG00000000981	1	3.36588	3.08789	2.3238	1.18255	1.12243	0.930425	1.08316	1.02187	1.17755	1.54865	1.20491	1.12734
ENSOCUG00000001028	1	1.34101	2.67634	1.93016	1.25189	0.875549	0.919318	0.976651	0.575688	1.13584	1.09589	1.15783	0.552618	MFSD2A
ENSOCUG00000001029	1	1.59501	2.66282	1.47031	0.518644	1.33391	1.05044	1.15921	0.286734	0.526663	0.679488	0.345877	0.530776	CDH17
ENSOCUG00000001035	1	69.8211	60.9553	52.861	12.6123	17.3838	10.3622	17.5572	15.489	14.096	22.8159	19.2789	11.5115	ADAMTS2
ENSOCUG00000001046	1	0.320589	1.00478	0.686135	0	0.0331413	0.0659332	0.0928505	0.0301721	0.0336473	0	0	0	IBSP
ENSOCUG00000001047	1	108.329	107.51	103.272	39.0398	39.3291	38.4601	48.8061	44.7265	38.3389	59.38	67.2024	53.4403	SMARCA1
ENSOCUG00000001050	1	157.807	171.181	175.611	91.5906	99.5119	109.387	88.8889	95.1422	78.8131	69.2874	76.3227	87.904	ZFAND6
ENSOCUG00000001082	1	3.49352	3.79901	3.61339	1.12753	0.792109	0.974899	1.21618	1.73563	1.52662	1.6601	2.14302	1.27328	CLIP4
ENSOCUG00000001085	1	4.28077	3.39534	2.89573	0.187509	0.10382	0.296908	0.242389	0.165407	0.0922292	0.176788	0.339192	0.0512824	ALK
ENSOCUG00000001098	1	2.09584	0.996313	1.77999	0.260874	0.28888	0.0821021	0.501021	0.319356	0.335189	0.454076	0.404489	0.183464	DTHD1
ENSOCUG00000001105	1	12.8652	14.3286	20.2581	2.43451	2.87559	5.18452	3.52467	1.63622	2.55455	2.63666	2.68426	3.19593	PLA2G1B
ENSOCUG00000001109	1	12.7674	9.62759	7.51914	3.30234	5.86223	4.79042	5.85293	4.38434	3.88405	6.09587	5.06256	3.91279	CAMTA2
ENSOCUG00000001151	1	41.6925	40.6085	36.2522	0.873993	0.967821	0.54554	0.331405	0.323074	0.425792	0.608507	0.240914	0.318708	DAPP1
ENSOCUG00000001158	1	1.47251	1.77767	1.61077	0.439889	0.426224	0.787386	0.17059	0.27717	0.370913	0.319029	0.397865	0.240613	ELL3
ENSOCUG00000001177	1	22.2145	29.4474	23.0288	4.81982	7.70295	8.03541	6.06208	5.56823	7.64481	9.06957	8.29458	8.32238
ENSOCUG00000001178	1	6.07158	6.17473	6.13314	2.2572	3.44379	2.48635	3.2161	1.36535	2.08654	1.45514	2.02212	2.52419	FAM78B
ENSOCUG00000001181	1	0.41803	0.363939	0.338895	0.168517	0.216073	0.214933	0.137582	0.169889	0.0797714	0.144087	0.201696	0.17465	FRK
ENSOCUG00000001186	1	32.0746	32.2736	31.8728	12.9111	14.6284	13.7459	20.0364	13.7533	14.0671	20.4966	17.4854	11.0341	ZDHHC8
ENSOCUG00000001212	1	84.7005	110.967	120.173	27.8929	52.1293	36.6863	43.0855	29.4144	29.0381	26.1447	25.8917	21.0679	JUN
ENSOCUG00000001225	1	2.7789	1.66882	2.76938	0.832251	0.672517	0.735043	1.49647	1.42106	1.07897	1.74878	1.85231	0.967875	METTL24
ENSOCUG00000001250	1	69.5228	53.418	60.1549	24.4233	33.81	21.3563	24.7977	27.77	25.2521	32.3219	22.0439	19.6574	EDNRA
ENSOCUG00000001264	1	6.48274	4.71346	3.34615	0.229879	0.161047	0.279055	0.417237	0.359452	0.126585	0.457288	0.32976	0.200159	CMYA5
ENSOCUG00000001304	1	20.1804	18.9689	14.2297	2.92763	3.86706	3.38391	3.65211	3.21618	2.70104	4.84446	3.66404	1.95324	AGAP2
ENSOCUG00000001380	1	7.5538	10.8398	6.01131	0.721838	0.368922	0.244651	0.401952	0.30788	0.249703	0.547674	0.344376	0.212603
ENSOCUG00000001405	1	8.34245	9.36881	8.92153	1.82028	2.94701	2.43655	2.23986	2.11386	1.73562	3.14164	2.19121	1.71406	ABTB2
ENSOCUG00000001415	1	0.987908	1.21048	1.14201	0.179328	0.36879	0.112876	0.18545	0.0516537	0	0.208091	0.0529619	0.0560512	SOAT2
ENSOCUG00000001439	1	115.686	77.7197	79.4307	22.9943	26.6462	26.3559	33.9276	26.577	26.8407	39.7215	32.5776	18.6041	FAT1
ENSOCUG00000001473	1	11.2789	15.0966	13.8214	6.12424	6.3058	7.21936	6.66667	5.52421	5.55652	3.11691	3.77608	5.87697	S1B
ENSOCUG00000001519	1	9.89684	11.1959	9.67077	3.2757	5.30153	3.75627	3.07484	3.47173	3.04062	4.34691	2.70881	2.46252	RTN4RL1
ENSOCUG00000001555	1	2.56121	2.93252	3.32217	0.173891	0.698027	0.311259	0.280981	0.273917	0.219936	0.327897	0.235918	0.0832263	ACE
ENSOCUG00000001596	1	12.0722	12.3518	13.2193	0.0890903	0.5426	0.0490672	0.092132	0.0898158	0.250402	0.0516901	0.0920906	0.146193	B3GALT2
ENSOCUG00000001597	1	4.69358	4.89892	5.06489	0.51549	0.366963	0.486704	0.228467	0.63105	0.869319	1.06817	0.304486	0.120842	ADAMDEC1
ENSOCUG00000001616	1	6.09117	5.18465	4.78729	1.54698	2.97778	2.18994	2.13723	1.93729	1.88868	3.2817	2.69845	1.25604	PCSK5
ENSOCUG00000001617	1	5.53901	3.98952	5.07042	1.98115	1.62123	2.1205	2.88634	2.3176	2.03121	2.53025	2.53729	1.54029	MTMR8
ENSOCUG00000001627	1	8.36008	9.30137	8.14596	3.26642	3.52045	4.72412	5.56974	3.53183	3.8265	4.45583	3.26044	3.08237	SLC6A11
ENSOCUG00000001659	1	6.07133	5.82196	5.02186	0.492857	0.818652	1.08578	0.509684	0	0.27705	0.57191	0	1.8871	SPINK1
ENSOCUG00000001685	1	60.1188	52.3138	51.3039	16.912	34.5031	17.4206	19.6864	7.40504	17.0466	21.3487	11.0372	13.4582	SLC7A8
ENSOCUG00000001725	1	215.061	189.485	169.915	27.5549	56.6607	27.5503	32.279	35.1252	30.2725	69.1824	44.5628	32.417	PDGFRB
ENSOCUG00000001765	1	26.2387	15.9338	19.0831	4.63286	5.38491	5.39271	4.38328	5.71402	5.63335	6.3482	5.40022	4.2954	DKK2
ENSOCUG00000001799	1	154.783	130.059	130.34	47.959	57.6837	41.9283	39.0551	53.6845	45.6462	67.946	51.8286	43.5247	EPB41L2
ENSOCUG00000001814	1	25.6757	24.2564	26.7099	10.4587	16.5817	8.98439	10.3175	11.2276	9.37056	13.8967	11.0323	8.86426	GUCY1B1
ENSOCUG00000001864	1	42.0425	55.4119	53.9989	1.39005	0.950733	2.83716	3.00186	1.85476	2.02242	7.40088	10.0581	8.90043	AQP8
ENSOCUG00000001887	1	37.0799	27.4167	32.9744	12.7816	11.6991	12.748	16.8215	21.2645	14.4699	19.0817	16.9596	10.8845	TMEM245
ENSOCUG00000001910	1	23.528	16.2606	19.412	7.109	6.94155	8.4523	12.1633	9.77415	9.6584	13.7802	9.90419	6.42238	ADGRL3
ENSOCUG00000001913	1	9.70462	8.82213	7.22924	3.18363	3.90816	3.56694	4.89145	3.503	3.96783	3.88426	4.40033	3.00515	LDHD
ENSOCUG00000001920	1	63.1247	64.0707	51.5839	16.1984	16.3947	17.7625	19.4821	16.0549	16.9828	28.9292	26.3441	21.9639	GPRC5B
ENSOCUG00000001938	1	97.8639	82.2112	75.3499	25.6644	29.4923	30.0182	36.6307	24.1203	24.576	38.611	38.4721	24.8587	LSS
ENSOCUG00000001968	1	55.8501	69.5709	55.1744	8.62515	25.6842	8.54	9.18688	7.68582	7.00939	10.1585	6.9455	8.1281
ENSOCUG00000002000	1	28.6514	18.651	20.115	2.09421	2.92026	1.1764	2.48038	3.34433	2.47517	3.8771	3.79907	1.24014	SGCD
ENSOCUG00000002020	1	4.05494	4.40655	3.6246	0.69803	1.5162	0.85761	0.9995	0.703715	0.784768	1.37076	1.19331	0.440552	LGI3
ENSOCUG00000002024	1	113.002	154.108	91.5905	0.127201	0.18781	0.420344	0.526177	0.299221	0.190677	0.34441	0.394456	0.278309
ENSOCUG00000002026	1	3.35407	1.57134	1.28762	0.266782	1.30608	0.139199	0.27589	0.254799	0.410434	0.0977599	0.14514	0.0921636	TBX18
ENSOCUG00000002037	1	16.5846	14.1593	12.1517	5.80313	6.57465	5.60922	7.59173	7.36482	6.26789	7.37724	6.79344	5.30179	PTPN21
ENSOCUG00000002042	1	2.88328	1.94831	2.22374	0.867377	0.780789	0.597915	0.920139	1.39346	0.905954	1.11689	0.809821	0.434651	NAALADL2
ENSOCUG00000002057	1	5.0453	7.34198	6.12937	0.853263	0.113384	0.225572	0.176479	0.309676	0.23023	0.15842	0.246959	0.112013	AHSG
ENSOCUG00000002083	1	5.55861	5.21072	4.16053	2.33328	2.26338	3.04305	2.65424	1.86301	1.65787	2.62089	2.34433	1.66426	TMC7
ENSOCUG00000002112	1	11.8331	10.3237	7.06163	0.47603	1.14729	0.694	0.579156	0.451677	0.440739	1.41345	1.30252	1.45507	MYBPC3
ENSOCUG00000002137	1	38.9012	40.4117	41.961	13.5894	15.6117	14.5019	14.3164	13.3581	13.0375	10.9965	13.543	12.9414
ENSOCUG00000002215	1	831.394	1329.45	1375.63	505.282	444.293	551.611	504.662	469.63	419.822	392.774	558.801	658.796	BEX5
ENSOCUG00000002251	1	102.547	100.915	104.577	25.9286	44.1755	31.3049	26.7964	24.1751	26.6356	39.0941	40.8509	43.1225	RCSD1
ENSOCUG00000002260	1	14.9823	12.2299	11.7412	4.61858	6.60526	4.53133	5.31771	3.86446	4.12036	5.94524	5.5086	4.56166	ACSS2
ENSOCUG00000002342	1	3.07351	2.14065	1.51801	0.52971	0.635459	0.583485	0.776043	0.489522	0.347394	0.973234	0.410662	0.869231	VSIG8
ENSOCUG00000002344	1	40.8527	39.8588	31.0825	10.9811	14.569	13.3674	15.5954	12.3089	12.6118	18.0832	16.445	13.0815	SEMA3B
ENSOCUG00000002345	1	24.325	19.7384	22.951	1.90727	1.93602	2.80119	3.14349	1.58231	1.96558	3.43506	3.22423	3.4775	CA1
ENSOCUG00000002381	1	5.96635	3.91227	4.07505	1.25428	1.10644	1.3699	1.57191	2.32538	1.14723	2.30654	1.81293	0.686073
ENSOCUG00000002399	1	2.65348	2.64459	2.83635	0.350303	0.166247	0.330741	0.284635	0.151352	0.168785	0.319385	0.310371	0.191611	PNCK
ENSOCUG00000002407	1	1.24362	6.11562	0.161311	0.105543	0.140248	0.116257	0.130976	0.148964	0.166121	0.293933	0.0654585	0.0692766	MFAP5
ENSOCUG00000002431	1	6.11949	4.62708	5.14006	0.104822	0.696453	0.115464	0.596206	0.211352	0.294619	0.364907	0.270881	0.229345	KCNC4
ENSOCUG00000002467	1	174.964	213.767	224.265	81.089	113.486	120.623	80.2636	57.0056	62.554	212.135	192.336	184.546	ZP4
ENSOCUG00000002470	1	48.0493	44.9997	35.933	15.5837	25.1807	16.6986	16.0884	18.1153	20.3061	17.6835	15.4236	11.8438	KLF6
ENSOCUG00000002473	1	27.4248	19.1249	19.4178	5.8244	7.38937	8.37012	8.36674	6.21209	8.78146	11.8947	7.40607	6.84644	OLFML2A
ENSOCUG00000002486	1	28.5574	21.44	16.3908	6.1273	4.37908	5.67264	6.93723	5.08479	6.36121	3.97959	2.9099	4.50946	COL6A6
ENSOCUG00000002507	1	974.587	1317.33	937.557	51.9366	66.6986	73.1035	102.35	49.4704	68.9887	100.523	125.431	122.435	STAR
ENSOCUG00000002510	1	3.5966	5.65939	4.22891	0.0746131	0.578363	0.205469	0.231482	0.0752208	0.209712	0.173162	0.154252	0.244874
ENSOCUG00000002537	1	42.2432	30.3988	33.5439	9.73501	10.4673	9.28521	13.9879	11.8581	10.5072	15.1567	12.8851	6.94882	ROBO1
ENSOCUG00000002566	1	220.27	286.677	230.828	2.66874	2.57145	2.25247	2.58065	1.88683	1.3638	2.37287	2.72279	3.22285	SHBG
ENSOCUG00000002574	1	0.78872	0.753983	0.570037	0.332059	0.367708	0.222642	0.179163	0.11644	0.227239	0.402074	0.238777	0.189529	STEAP4
ENSOCUG00000002613	1	59.7542	38.0998	34.6804	10.3704	11.9367	8.09309	15.285	14.645	10.3344	29.7782	22.9489	10.2126	VCAN
ENSOCUG00000002614	1	1.7616	1.54263	1.58012	0.115406	0.415335	0.127122	0.477384	0.174519	0.291929	0.200875	0.447346	0.126251	IL1RAPL2
ENSOCUG00000002671	1	185.299	218.89	194.927	77.4755	95.2565	74.6174	72.7674	68.9028	79.26	79.7773	76.4676	88.8293	IDH1
ENSOCUG00000002674	1	1.02999	1.23989	1.29271	0.178062	0.27605	0.196139	0.276213	0.215415	0.100094	0.289272	0.184059	0.194795	KCNG3
ENSOCUG00000002685	1	3.2371	3.38188	3.10878	0.0464919	0.180191	0.0256058	0.132218	0.140612	0.196009	0.107898	0.120144	0.0508608	ADCY8
ENSOCUG00000002701	1	13.1088	18.2126	17.7134	1.93225	1.45288	2.68022	1.85021	1.49105	1.36778	1.46711	1.62745	1.64409	CHADL
ENSOCUG00000002719	1	25.7368	23.548	20.531	3.76823	3.6378	4.68292	7.02771	4.87041	4.3089	5.62464	6.35872	4.79177	EPN3
ENSOCUG00000002754	1	4.24525	4.54528	3.95501	1.6785	1.78642	2.01325	1.93832	1.50415	1.2266	2.23989	2.4194	1.5812	ABCC3
ENSOCUG00000002771	1	31.5438	28.7699	24.9969	9.26173	12.1908	8.44557	6.66597	9.69628	10.0503	7.61758	6.22462	13.1383	TOB1
ENSOCUG00000002798	1	101.895	113.501	113.842	45.0612	59.54	44.0242	42.0019	33.6626	36.2902	43.1531	42.2703	41.5441	ABHD12
ENSOCUG00000002824	1	6.77332	7.15022	4.28403	0.425953	0.26837	0.53391	0.797448	0.355383	0.305494	0.485752	0.622489	0.377604	PITPNM3
ENSOCUG00000002826	1	0.317932	0.474502	0.445532	0.106001	0.152595	0.0233524	0.175392	0.106865	0.0715039	0.196806	0.33967	0.0579811
ENSOCUG00000002828	1	1144.41	1384.68	1329.89	269.175	569.731	257.089	292.114	260.228	277.46	460.332	372.01	384.474	IGFBP4
ENSOCUG00000002859	1	8.80567	7.46312	7.3018	1.12023	2.93096	1.2158	1.81721	1.64974	1.30264	2.72088	2.27049	1.08733	ADAMTS5
ENSOCUG00000002868	1	3.46192	3.48554	3.31824	1.02232	2.37371	1.38039	0.989019	1.26338	1.29766	1.45418	1.53399	1.11839
ENSOCUG00000002883	1	1.86321	1.70189	1.27113	0.31366	0.789394	0.722413	0.707714	0.689923	1.08997	0.761029	0.589497	0.561494	TLL2
ENSOCUG00000002884	1	35.7321	33.0761	28.7542	11.5064	20.4814	13.729	13.812	13.4086	13.8662	27.9551	21.1362	17.5597	JAG1
ENSOCUG00000002907	1	3.43872	4.32755	5.53099	0.0623339	0.149556	0.205986	0.290079	0.157104	0.128479	0.204941	0.236255	0.0681915
ENSOCUG00000002909	1	48.9948	47.7494	57.2079	1.31191	1.35425	1.46958	1.88558	2.06234	1.87491	4.33478	5.35539	4.57314	GRB14
ENSOCUG00000002913	1	15.0759	13.69	10.5299	3.43302	4.62575	4.66783	7.00339	5.46862	5.12605	8.57423	7.53392	4.51849	BCORL1
ENSOCUG00000002935	1	34.2163	32.7053	30.1573	9.94014	12.8624	9.84201	11.2613	33.779	8.66401	7.06327	8.60089	3.84874
ENSOCUG00000002956	1	1.25221	0.520683	0.82223	0.488535	0.25117	0.345941	0.649562	0.721181	0.313852	0.708619	0.937834	0.534443	CPNE4
ENSOCUG00000002988	1	47.0231	41.1167	41.4615	8.26179	14.0514	12.7146	14.3897	11.039	10.6439	23.5775	18.9392	11.9572	ATP1B2
ENSOCUG00000002998	1	197.639	212.181	184.938	47.4041	77.8854	49.2948	52.9124	44.6058	44.5116	61.4708	59.9421	66.7094	PKDCC
ENSOCUG00000003033	1	15.676	13.9633	15.1172	0.0752401	0.68737	0.248635	0.389045	0.303411	0.359506	0.632986	0.311096	0.144043	GDNF
ENSOCUG00000003040	1	24.4657	22.9096	21.7725	2.64218	4.8993	2.69555	4.02523	3.39667	2.81102	3.96108	3.02444	2.39579	ADAMTS3
ENSOCUG00000003049	1	1.23568	1.4218	0.889278	0.333925	0.392184	0.289801	0.481363	0.22443	0.386795	0.551873	0.428848	0.287815	COL17A1
ENSOCUG00000003120	1	1.25122	0.904785	0.621915	0.315952	0.275656	0.25311	0.405949	0.33783	0.592021	0.42218	0.287005	0.26185	OPRK1
ENSOCUG00000003146	1	0.545075	0.186706	0.15937	0.0333673	0.00923738	0.0459434	0.0172533	0.0420489	0.0187568	0.0387194	0.0517366	0.00912573	QRICH2
ENSOCUG00000003153	1	52.9144	55.1323	52.6059	11.1569	18.2628	13.8239	15.642	13.182	14.6856	15.9353	14.8607	13.4417	TRIB2
ENSOCUG00000003157	1	13.6516	14.9146	13.2054	5.14866	6.45323	5.46879	5.6755	7.51495	6.02697	6.95929	7.8661	6.40617	DCBLD1
ENSOCUG00000003186	1	121.211	139.536	138.04	50.4385	40.3673	48.2324	55.9965	54.5888	56.8498	55.2633	62.4058	71.4565	HPRT1
ENSOCUG00000003214	1	0.324147	0.332005	0.272059	0.0356007	0.118268	0.0980369	0.128857	0.0897266	0.18011	0.123933	0.0367996	0.0778922	BTC
ENSOCUG00000003217	1	11.8205	12.6722	10.448	3.88438	10.0458	4.50875	4.96726	3.64653	3.71905	6.39764	5.06001	3.56401	COL23A1
ENSOCUG00000003247	1	13.0222	7.78752	5.80961	2.85981	4.97158	2.74366	3.21186	3.69947	4.30995	3.53262	2.86076	2.04085	MRC1
ENSOCUG00000003249	1	78.7033	85.2079	68.8429	12.0928	24.2256	13.6837	12.5815	13.669	12.2359	16.2011	10.1137	10.3829	FZD1
ENSOCUG00000003271	1	27.0515	22.0281	22.8043	7.90855	10.7551	9.42289	11.0541	11.9039	10.4765	16.3341	14.1595	10.8319	GAB1
ENSOCUG00000003307	1	3.94561	3.14395	2.23968	0.811596	1.0946	1.0086	1.34504	0.996533	0.666788	1.13496	1.21537	1.00169	BIRC7
ENSOCUG00000003333	1	51.4264	34.2561	37.6633	12.8683	13.048	13.2551	16.6624	15.5281	13.6227	29.6503	21.4319	12.1727	LIFR
ENSOCUG00000003371	1	60.2678	80.3209	55.2502	14.4498	15.4448	11.5551	14.2709	8.87754	10.6641	11.7613	12.0652	12.672	SELENBP1
ENSOCUG00000003372	1	11.7813	16.5394	12.4405	0.595581	4.70458	0.743515	0.533793	0.760547	0.401754	0.967555	0.246255	1.12935	ART3
ENSOCUG00000003405	1	9.60765	10.7537	8.7678	4.73187	6.83846	4.87359	6.01311	4.00229	2.82524	5.02552	3.91022	3.53876	MFSD6
ENSOCUG00000003426	1	17.0082	25.1061	20.2716	6.56489	7.14287	8.1773	6.5522	9.92754	5.25657	4.49544	7.21996	4.98968	WSCD1
ENSOCUG00000003431	1	10.3686	11.0902	9.7747	1.75154	3.72602	2.03089	2.02584	2.55576	2.15056	3.15569	3.0493	2.52122	BMP6
ENSOCUG00000003436	1	1.1493	1.24914	0.600582	0.31436	0.348108	0.436605	0.261488	0.172239	0.184395	0.253762	0.247242	0.13457	SPTBN4
ENSOCUG00000003439	1	193.2	166.227	158.213	56.121	81.6395	66.1476	78.595	66.6716	70.06	112.782	86.0756	72.5852	DAG1
ENSOCUG00000003441	1	19.4359	15.8549	10.5852	6.06234	7.04409	6.12913	8.50626	8.12026	7.9836	8.68607	10.7384	6.86554	FAAH
ENSOCUG00000003499	1	268.099	272.137	232.095	116.784	94.6826	92.7641	127.304	130.129	128.379	177.795	170.032	151.936	FADS2
ENSOCUG00000003569	1	114.564	90.1179	91.6896	12.8476	16.2203	11.4698	13.0451	14.7409	18.7394	15.9002	17.6512	14.0194	HMGCS1
ENSOCUG00000003576	1	1.72837	1.34197	0.660071	0.277823	0.337231	0.782723	0.569092	0.883348	0.919019	1.30194	0.88363	0.847499	TENM2
ENSOCUG00000003579	1	3.07283	4.50733	3.45436	0.469411	1.03961	0.861773	1.3754	1.05163	0.52774	1.39202	0.835655	1.25527	TEX36
ENSOCUG00000003594	1	25.7553	17.6125	15.337	3.74939	7.99627	1.22371	4.82111	4.39991	3.65772	5.31762	3.6911	1.99661	OLFML2B
ENSOCUG00000003633	1	13.0654	13.338	11.9094	0.760357	1.70485	1.09366	0.766821	0.912257	0.861905	1.87401	0.902884	0.989921	GFRA1
ENSOCUG00000003715	1	1.59719	1.90855	2.17836	0.350834	0.388498	0.483062	0.408163	0.0442114	0.0986073	0.152665	0.0453311	0.0959505
ENSOCUG00000003743	1	27.2385	27.2961	24.4543	9.09305	11.2455	11.4521	11.434	11.2277	8.59453	11.1865	10.647	9.98275
ENSOCUG00000003769	1	68.7399	58.207	54.9301	12.3145	15.2841	11.373	10.8813	10.8697	12.4542	12.9377	13.2758	14.7463	MSMO1
ENSOCUG00000003773	1	8.77113	8.38997	9.26529	1.99142	1.32312	2.02584	2.26535	2.52726	2.33106	2.66426	2.26433	2.46048	DTNA
ENSOCUG00000003785	1	82.046	71.432	73.9361	24.9051	43.9361	22.3418	28.4093	33.524	24.2891	36.497	30.1463	19.3475	HIPK1
ENSOCUG00000003810	1	16.3333	16.8181	14.3871	3.66667	4.91449	5.61022	7.11382	4.10134	3.84906	5.43191	6.13851	3.07489	NYAP1
ENSOCUG00000003823	1	6.7483	9.48334	7.5126	2.66489	2.95098	1.62123	2.27157	1.36016	1.76753	2.10899	2.95057	2.87871	SYTL3
ENSOCUG00000003829	1	54.5089	68.0834	43.8443	26.2634	28.2756	17.9555	26.2177	15.4944	16.505	18.4923	21.601	13.9559	EZR
ENSOCUG00000003866	1	81.0722	47.3061	51.1362	18.5405	20.702	12.7823	19.3474	22.0137	24.3039	35.5759	24.662	13.908	FBN1
ENSOCUG00000003876	1	4.18456	3.32029	3.3506	0.771405	0.678995	0.708096	0.797742	3.14066	0.78943	1.35418	1.55388	0.865533	FHDC1
ENSOCUG00000003963	1	37.5111	27.9191	30.8075	4.11376	1.83869	3.07229	5.93274	5.92466	4.52007	5.94264	6.70147	3.10227	BCAT1
ENSOCUG00000003979	1	14.6402	14.8218	14.5031	4.99011	8.69047	4.99106	5.86488	4.7919	6.04302	7.57749	6.22959	4.4709	MANSC1
ENSOCUG00000003996	1	47.7888	38.0652	29.8067	15.1039	19.6097	17.8531	23.4458	21.0231	14.9988	28.6673	25.6927	15.8196	KIDINS22
ENSOCUG00000004045	1	2.24299	2.3049	1.96743	0.720863	1.17837	0.718419	0.638978	0.38067	0.463108	0.716989	0.212897	0.525735	MFSD6L
ENSOCUG00000004110	1	19.2636	20.1594	15.6328	8.1979	10.3459	8.64336	9.44082	7.64905	7.94652	9.58368	8.2215	8.45054	FITM2
ENSOCUG00000004123	1	2.22798	2.09364	1.33717	0.554646	0.263224	0.545493	0.778433	0.698954	0.623567	0.321805	0.614277	0.346724	PLA2G3
ENSOCUG00000004152	1	5.09795	9.98913	7.27387	2.43669	3.71014	2.43243	2.2049	1.76564	1.969	2.96007	2.36133	3.24878	GDF1
ENSOCUG00000004177	1	10.8571	9.02146	10.0021	4.35677	4.91476	4.91878	4.73969	4.25528	3.97147	5.22375	4.99036	3.77529	ZSWIM5
ENSOCUG00000004211	1	7.68705	10.2741	6.62744	3.85971	5.41382	3.81063	4.25758	4.00644	3.82503	2.81998	3.07354	4.0973	TMEM12
ENSOCUG00000004222	1	12.3298	12.1052	10.2337	3.68109	4.63495	3.33439	3.28502	4.06899	3.73936	4.83528	3.68916	2.88227	SLC22A3
ENSOCUG00000004228	1	30.5263	34.7412	32.2213	0.260422	0.411972	0.49176	0.307787	0.412568	0.460088	0.690728	0.461473	0.162797	PRSS33
ENSOCUG00000004261	1	4.28614	4.45793	3.28201	1.56051	1.49763	1.92167	1.9862	1.63776	1.38554	1.77366	1.6296	1.1381	SLC35G1
ENSOCUG00000004266	1	19.6381	23.8815	20.8279	7.87829	13.6991	13.58	14.3788	9.25189	9.21634	7.46181	8.25366	9.0612	FAM222A
ENSOCUG00000004278	1	18.3951	10.1682	11.5045	1.87894	4.87329	2.04906	2.91141	3.18434	2.70895	2.89743	2.49068	1.50236	ROBO2
ENSOCUG00000004282	1	15.3285	14.0237	13.1258	3.44554	7.68816	3.78392	3.53107	3.17109	3.78063	5.43898	3.52949	3.01093
ENSOCUG00000004294	1	27.1394	26.4614	25.7386	3.55238	2.00399	2.54715	2.46066	5.77741	4.55897	2.48886	3.08311	2.05309	NKX3-1
ENSOCUG00000004418	1	20.2134	18.4195	16.7534	3.5343	9.68223	2.89443	3.16234	5.09677	5.78747	7.79228	5.05112	2.85779	CREB3L1
ENSOCUG00000004438	1	12.0611	15.4244	13.2471	3.8168	8.24178	7.46257	7.00612	3.55929	4.1838	4.53973	5.0303	4.17547
ENSOCUG00000004455	1	18.5983	17.2665	17.6221	5.63868	9.14676	6.68887	7.10534	7.7379	6.12026	9.49735	8.68762	6.20293	GUCY1A1
ENSOCUG00000004459	1	9.91089	7.51428	9.97944	0	0.0461511	0	0.0861995	0	0.0468557	0	0	0	KCNA1
ENSOCUG00000004480	1	5.37353	10.0936	4.53055	0	0	0	0.0943218	0.183901	0.307625	0.317512	0	0.598672	CSRP3
ENSOCUG00000004490	1	2.44044	1.26604	1.59572	0.577689	0.859606	0.461342	0.728096	1.20119	1.18935	0.729004	0.697911	0.335736	GUCY1A2
ENSOCUG00000004492	1	5.90564	6.35931	4.33653	0.470116	0.788766	0.721838	0.987065	0.847356	0.400404	0.826547	0.544851	0.529878	KCNQ1
ENSOCUG00000004497	1	2.42297	2.94444	8.14772	0.176715	0.195687	0.116793	0.182749	0.178154	0.278144	0.20506	0.2192	0.309314	TAF7L
ENSOCUG00000004500	1	31.4784	25.4769	23.8485	9.69222	13.7609	10.78	12.266	12.9761	9.27611	16.6788	13.7504	8.42198	TACC1
ENSOCUG00000004532	1	4.23356	3.58005	3.24357	0.136023	0.669447	0.241395	0.140667	0.3733	0.297355	0.394601	0.367132	0.0909363	THRB
ENSOCUG00000004549	1	87.0848	76.95	76.48	22.9333	24.6187	21.9705	25.6745	23.0069	24.6792	30.8924	33.6373	29.1086	CYP51A1
ENSOCUG00000004569	1	62.8614	67.5682	63.6973	24.4259	34.2039	28.5913	27.6899	30.142	22.9769	28.0208	30.6018	28.497	ANXA11
ENSOCUG00000004590	1	35.5161	25.8367	13.8815	8.87143	9.56334	11.8449	13.3445	12.6476	8.42485	14.5057	13.1069	5.31819
ENSOCUG00000004598	1	9.51866	8.09567	6.84848	0.761202	1.05814	0.517358	0.815105	0.511601	0.807235	0.927149	0.602684	0.596497	TNIK
ENSOCUG00000004599	1	4.53906	5.42095	4.04777	1.44642	2.18825	1.3913	1.4326	1.47874	1.21389	2.22214	1.53725	1.69378	LGI4
ENSOCUG00000004622	1	248.622	271.359	236.146	111.914	111.273	105.762	113.88	100.726	105.177	103.786	125.098	108.333	PAPSS1
ENSOCUG00000004633	1	9.25442	10.2434	11.6706	1.2741	2.47386	1.26886	1.89517	1.93551	2.35466	3.05818	2.92266	2.3485	PTGER3
ENSOCUG00000004645	1	10.7703	10.9644	9.19224	3.95781	4.12489	4.72823	5.67293	3.65265	3.54987	4.72771	4.70777	3.50199	WHRN
ENSOCUG00000004686	1	39.8592	23.9377	23.386	7.24847	14.4799	10.8091	14.4591	13.2102	11.0543	22.57	14.4526	8.98007	TENM4
ENSOCUG00000004694	1	17.2544	18.2768	15.4076	6.7206	10.827	8.40582	9.46104	7.16874	6.04457	7.59731	7.37271	5.45481	MINDY1
ENSOCUG00000004703	1	23.1092	21.1493	19.6036	8.46422	10.1349	10.3847	12.3233	9.55066	8.09763	15.4515	14.0605	11.4804	SCMH1
ENSOCUG00000004730	1	1.11803	1.32326	0.75591	0.491167	0.407923	0.518486	0.867725	0.474536	0.483176	0.90242	0.846181	0.268661	SYBU
ENSOCUG00000004783	1	25.2369	23.6078	20.6643	4.09923	2.89082	4.32525	4.35074	3.37134	4.31753	3.83042	4.03656	3.30432
ENSOCUG00000004791	1	58.2091	63.7186	42.1792	18.499	17.4214	21.1502	21.3511	23.0207	16.2018	15.2851	14.5976	19.4694	PCED1B
ENSOCUG00000004834	1	7.15515	8.41177	8.399	1.30751	4.28067	1.09583	1.14638	1.63337	1.34215	1.55021	1.26339	1.77242	F3
ENSOCUG00000004847	1	2.79736	2.26788	1.90064	1.45081	1.74427	1.32413	1.67181	0.58505	1.16506	1.29871	0.771258	0.997633
ENSOCUG00000004863	1	0.514081	0.316642	0.187118	0.0293827	0.0976114	0.118674	0.0607718	0.029622	0.0550565	0.0340956	0.0607445	0.0214292	IQSEC3
ENSOCUG00000004900	1	29.0177	23.9947	23.1487	7.73683	19.2364	8.86558	11.9334	11.5706	14.157	17.6502	13.9399	11.9797	PALLD
ENSOCUG00000004936	1	3.68868	1.87209	1.42658	0.474074	1.54606	0.464816	0.700371	0.798309	0.737977	1.60803	0.915458	0.883369	NAV3
ENSOCUG00000004959	1	11.0581	9.79836	11.1681	0.222109	0.609537	0.265931	0.329558	0.0389423	0.151997	0.212911	0.259535	0.105644	HHIP
ENSOCUG00000004997	1	2.82061	3.85557	3.04032	1.27967	1.41705	1.08429	1.78144	0.570617	1.05134	1.48492	1.42451	0.753803	MST1
ENSOCUG00000005007	1	140.852	188.291	143.474	4.78456	6.36715	4.3919	5.03472	4.23117	5.89814	5.11368	3.94788	4.82095	KCNE5
ENSOCUG00000005043	1	38.4086	39.7206	38.9275	3.09609	2.4787	2.67302	1.86051	1.0545	1.78745	2.8159	1.18932	1.76217	LIPH
ENSOCUG00000005061	1	5.50744	8.52409	5.7089	0.922822	1.02189	0.943897	0.74983	0.0664527	0.22232	1.75924	0.545086	2.01908
ENSOCUG00000005094	1	83.6355	86.3183	85.6386	6.58563	5.37981	6.0174	9.49	4.68013	6.31158	4.68539	5.80304	4.8896	INHBB
ENSOCUG00000005098	1	20.1036	19.2979	14.8083	6.85535	8.99711	7.99411	8.48978	6.36725	5.59011	11.5887	9.43736	7.03662	STK1
ENSOCUG00000005101	1	121.428	113.11	82.279	43.4773	64.0476	53.5065	58.0324	46.5757	37.4061	58.9116	57.7876	32.6206	LAMB2
ENSOCUG00000005112	1	10.0866	9.71436	8.05115	3.12312	3.70766	4.59722	5.02405	4.76538	4.17549	4.67972	3.83906	4.53495	FBXO32
ENSOCUG00000005141	1	126.6	166.044	162.26	53.7214	57.789	91.2987	82.5397	83.5595	60.397	73.0248	66.6367	52.0531
ENSOCUG00000005165	1	14.637	18.911	16.0925	1.31028	1.19185	1.85566	2.08091	1.65119	1.42049	2.22636	1.88649	1.53579
ENSOCUG00000005180	1	1.62999	3.12608	1.4325	0	0.219786	0.145751	0.205255	0.0666982	0.223141	0.153542	0.205162	0.289506
ENSOCUG00000005190	1	270.624	249.472	197.891	20.719	24.8539	22.8525	30.0649	22.7515	25.2334	40.0439	38.4454	25.5572	DHCR24
ENSOCUG00000005237	1	5.31794	4.2984	4.18342	1.62613	2.40292	1.83272	3.30761	3.27331	3.03892	4.34874	3.27829	2.20305	PCDH17
ENSOCUG00000005248	1	1.14582	0.654481	1.05965	0.186769	0.357233	0.224431	0.438966	0.239641	0.343598	0.216726	0.386117	0.204319	ZNF84A
ENSOCUG00000005263	1	7.52444	8.01066	8.37384	0.780489	0.71779	0.743149	1.53219	1.33364	1.16005	0.844275	0.724728	0.75253	TOX
ENSOCUG00000005274	1	8.99345	6.08579	6.77576	3.1726	1.97082	2.94064	2.92082	2.53535	2.1749	2.64887	2.11964	1.26978	PRLR
ENSOCUG00000005324	1	16.9551	11.3182	8.81346	4.28344	4.8901	5.39232	7.18768	5.78347	4.23094	7.90544	6.59937	4.32893	MAP1A
ENSOCUG00000005336	1	10.394	6.92862	5.31721	0.777306	3.03682	0.394436	0.686429	1.37356	0.883714	2.02693	0.640981	0.487279	ABI3BP
ENSOCUG00000005341	1	56.1446	69.9451	64.5979	20.4026	28.5961	20.9667	21.1081	19.0333	19.0585	22.9862	22.673	20.6254	HEXB
ENSOCUG00000005382	1	7.03037	8.83297	5.28599	2.89551	2.97123	3.21072	2.81471	1.01195	2.0617	2.75516	4.2501	1.49933	ZNF575
ENSOCUG00000005396	1	0.737502	0.642073	0.487169	0.114749	0.105889	0.189596	0.0988885	0.134964	0.0645037	0.133154	0.118613	0.0836877
ENSOCUG00000005415	1	20.0715	20.3907	19.7853	7.14421	7.99564	7.42139	7.59847	7.15113	7.48888	9.2342	7.88414	8.03807	PXMP4
ENSOCUG00000005422	1	6.09251	7.79049	5.43308	1.82182	1.91899	1.71309	1.51641	0.985523	1.29886	1.28904	1.56165	1.94441	SNAI1
ENSOCUG00000005432	1	2.93737	3.71968	0.476261	0.623218	0.414075	0.137297	0.773395	1.63356	0.840793	1.30173	1.15957	0.545426
ENSOCUG00000005496	1	10.1127	7.55147	7.66231	1.36986	1.50428	1.40833	1.5701	1.18537	0.85988	2.43736	2.13579	1.2738	SLC7A9
ENSOCUG00000005507	1	9.61963	7.46394	7.11559	2.43888	2.93099	2.51986	2.83497	3.12584	4.09165	3.43337	2.77506	2.35782	GNA14
ENSOCUG00000005520	1	67.6294	87.9699	86.4075	7.61223	25.3527	10.1132	13.5509	10.8669	15.0911	20.4984	16.8784	15.5427
ENSOCUG00000005522	1	0.334429	1.19235	0.511254	0	0	0.0245642	0.13837	0.0224819	0.0250714	0.0258772	0	0	TRIM55
ENSOCUG00000005524	1	70.9608	77.3222	62.0662	9.51672	28.6974	8.26334	8.20671	13.8444	9.58405	12.482	9.77313	10.5806	TMBIM1
ENSOCUG00000005533	1	0.988694	0.580925	0.529735	0.284873	0.29022	0.382827	0.512603	1.08559	0.57649	0.760303	0.588934	0.367739	SCN2A
ENSOCUG00000005585	1	0.557957	0.23552	0.452333	0	0.104872	0	0.122423	0.0716073	0.0266183	0.0274739	0.171315	0	SLC7A14
ENSOCUG00000005605	1	25.8644	23.3345	22.1215	7.98542	14.6707	10.8327	10.8777	8.21191	8.96134	12.5437	9.40559	8.52081	LDLRAD4
ENSOCUG00000005614	1	6.12862	5.44521	6.75102	1.93365	2.40575	2.07983	2.34079	1.86913	1.93096	2.37579	1.95174	1.91627	TTC9
ENSOCUG00000005620	1	5.70272	3.66949	4.26985	1.99493	1.71891	0.923188	2.002	2.29084	1.50627	2.9724	2.6295	1.2849	NRXN1
ENSOCUG00000005658	1	1.8722	2.31052	1.35908	0.404751	0.509321	0.567432	0.742009	1.24269	0.74462	1.25957	1.29318	0.885571	PDZRN4
ENSOCUG00000005660	1	67.2957	62.6837	54.1546	25.8423	30.5902	30.7794	27.1854	18.1599	17.3892	17.3572	17.304	18.5222	PDGFA
ENSOCUG00000005669	1	4.11939	4.54273	4.24497	1.19642	1.5851	1.32964	2.18731	2.0354	1.78945	2.85102	3.22429	1.97496	ADGRD1
ENSOCUG00000005692	1	6.95182	4.86745	5.34	0.885914	2.64648	0.306371	0.735059	1.49547	0.972837	1.56593	0.841211	0.191579	ST6GALNAC5
ENSOCUG00000005739	1	1.58633	1.33345	1.69106	0.561726	0.62203	0.675001	0.792142	0.257409	1.03341	0.296284	0.211143	0.279324	HCRTR1
ENSOCUG00000005740	1	582.276	640.321	626.847	245.473	227.209	241.118	233.087	207.348	221.688	257.49	253.659	261.746	ARL6IP1
ENSOCUG00000005747	1	116.707	132.648	82.1931	12.8597	26.2802	9.98972	17.6193	18.029	21.6407	38.7131	27.4598	16.1527	COL16A1
ENSOCUG00000005766	1	31.0022	19.8101	16.9533	6.82786	7.83817	10.2548	10.4505	6.19905	5.12379	13.4504	8.89272	5.00401	ITPR3
ENSOCUG00000005778	1	34.2683	31.2856	37.9173	2.66674	12.361	3.99669	2.40922	3.59794	2.07305	4.60145	2.90001	2.07142	CPED1
ENSOCUG00000005789	1	69.4536	64.8152	69.4729	0	0.0883496	0.117178	0.137514	0.134057	0.0896984	0.185163	0.164942	0.0290939
ENSOCUG00000005799	1	1.70726	1.42172	1.67692	0.259859	0.211021	0.190826	0.2329	0.27944	0.447962	0.361847	0.322332	0.549604
ENSOCUG00000005808	1	14.2133	18.1312	17.8774	3.0698	3.17571	2.20238	2.63158	2.5247	5.13147	1.73422	1.60746	1.8117	PDLIM3
ENSOCUG00000005816	1	27.9256	21.4796	25.5719	1.24654	4.54048	1.53339	1.97618	2.95992	3.25105	4.94153	4.07486	3.71031	SORBS2
ENSOCUG00000005824	1	100.711	107.858	97.1353	34.9316	49.6207	38.6553	38.6484	32.5697	32.1789	40.9353	34.9179	27.9112	GLB1
ENSOCUG00000005826	1	1.97225	2.3336	1.72031	0.348333	0.637632	0.328881	0.566068	0.537504	0.58343	0.35471	0.404153	0.311074	PCDH1
ENSOCUG00000005827	1	154.748	198.396	187.042	24.4714	42.862	24.2407	34.6442	31.7956	31.8667	74.7125	54.7247	42.7566
ENSOCUG00000005836	1	11.3741	12.6382	11.48	1.5462	2.35326	2.70408	2.77361	1.62529	1.12045	1.5221	1.46193	0.994058	NRG1
ENSOCUG00000005839	1	33.0151	26.4326	22.1758	4.05798	4.42158	3.51145	4.81885	6.46038	4.80908	7.63421	6.65762	4.6973
ENSOCUG00000005892	1	11.8076	10.4492	10.626	3.48251	4.29231	5.28706	8.23625	4.19778	4.13654	6.50088	7.93518	3.42878	ARHGAP33
ENSOCUG00000005900	1	50.7246	59.4936	48.3559	10.9303	11.401	6.74909	10.8622	9.68464	10.2958	19.4505	14.1145	7.95964	FBLN2
ENSOCUG00000005910	1	1.95235	1.07649	0.783468	0.113913	0.126142	0.27605	0.376967	0.390459	0.307364	0.42299	0.376798	0.174465	IHO1
ENSOCUG00000005947	1	2.4328	1.84715	2.27409	0.885597	0.680142	0.928298	0.723803	0.662407	0.38541	1.12709	1.12213	0.703174	SCEL
ENSOCUG00000005958	1	17.5502	11.4189	15.6968	6.09913	7.08149	6.88469	9.64656	10.248	8.89502	14.0672	12.6546	6.41061	ATRNL1
ENSOCUG00000005974	1	12.1838	10.1222	12.9468	5.23014	3.47186	3.22125	8.273	4.87586	4.93165	6.73794	7.12117	4.69112	LINGO1
ENSOCUG00000005985	1	64.2049	108.495	62.9842	35.7306	62.0268	42.0554	26.3978	23.0753	25.5213	29.3656	27.2622	24.1124	CLU
ENSOCUG00000005991	1	56.411	33.4053	33.9265	7.50621	9.42436	12.3822	15.0528	6.95974	6.41647	10.4162	9.90168	5.89395	ALPK3
ENSOCUG00000006048	1	22.9898	23.9784	19.5542	7.09203	10.6036	6.52462	9.33938	6.641	6.24127	10.3717	9.06062	7.20637	MICAL1
ENSOCUG00000006107	1	2.8855	2.88312	6.21039	1.17638	1.51035	1.74652	1.60443	1.25471	1.55257	1.46399	2.1324	1.58535	GRAMD2A
ENSOCUG00000006124	1	6.00951	8.03283	6.27931	0.680018	0.847149	0.187263	0.351618	0.514167	0.764518	0.394546	0.35146	0.46495	LNP1
ENSOCUG00000006134	1	49.7323	67.951	66.9482	14.125	39.36	18.8748	25.3831	15.6407	21.0869	20.4211	24.175	18.1122
ENSOCUG00000006167	1	4.57243	5.14588	14.52	0.208223	0.230576	0.0286701	0.0807494	0	0.0877863	0.0302026	0.0269044	0
ENSOCUG00000006190	1	43.518	37.3673	32.2626	11.5709	25.7708	10.3823	14.5449	13.9542	12.7944	22.4875	15.4052	9.80487	NCAM1
ENSOCUG00000006203	1	1.0271	1.08388	0.532906	0.104601	0.193051	0.182432	0.180287	0.0439388	0.107799	0.192183	0.144165	0.143038	STYXL2
ENSOCUG00000006205	1	0.502226	0.449058	0.25016	0.19641	0.112256	0.181454	0.209668	0.0958113	0.163832	0.279379	0.183377	0.166349	OTOG
ENSOCUG00000006207	1	38.1724	29.812	22.9931	11.9315	11.5343	13.0407	17.2798	16.0582	15.1327	20.9791	19.5431	11.9161	BTBD7
ENSOCUG00000006220	1	88.1184	47.7482	57.2103	25.655	24.5483	26.6378	31.3082	34.7098	24.3569	30.1858	26.6691	18.6258	CLCN3
ENSOCUG00000006228	1	9.45231	14.5273	6.8333	3.77674	4.1431	4.8211	4.56271	2.38413	4.20636	6.22563	4.15932	4.32471	SUSD4
ENSOCUG00000006248	1	2.96768	4.03884	2.79856	0.318444	0.599471	0.385848	0.493974	0.642074	0.25061	0.480377	0.724169	0.522552
ENSOCUG00000006266	1	1.86971	2.89383	2.47014	0.727276	1.44963	1.17496	1.35379	0.391039	1.03569	1.23776	0.551297	0.42433	MAFF
ENSOCUG00000006271	1	1.74245	1.52995	0.292178	0.0834184	0.0692803	0.183773	0.237233	0.0630733	0	0.241996	0.237126	0.114072	ADGRD2
ENSOCUG00000006299	1	38.8691	41.6235	30.258	16.6806	19.3908	15.0484	19.4552	12.8026	14.7015	19.0496	18.7638	16.8857	ARVCF
ENSOCUG00000006316	1	169.959	215.099	154.543	60.2937	75.5475	68.5392	59.5819	54.267	56.0599	61.7165	61.4012	80.3003	PLEKHO1
ENSOCUG00000006336	1	3.38939	3.26199	2.13959	0.770901	2.39535	0.899856	1.09469	1.20637	1.0866	2.42998	1.21313	1.42235	CALHM2
ENSOCUG00000006416	1	43.849	46.0961	37.0233	2.85165	4.99135	3.85043	3.13927	2.96761	3.51626	3.62928	3.04277	7.04431	NRB2
ENSOCUG00000006426	1	2.58632	2.31421	1.12116	0.201204	0.55701	0.692592	0.416147	0.659238	0.98965	0.904721	0.727929	0.412708
ENSOCUG00000006438	1	2.58617	3.37153	3.13809	0.643815	0.57583	0.381863	0.435328	0.436866	0.584621	0.761449	0.588709	0.799127	SHC4
ENSOCUG00000006444	1	9.16433	5.28134	5.89838	2.08666	2.34794	1.83879	2.06045	2.78904	2.1719	3.65547	2.72748	1.73047	CD19
ENSOCUG00000006461	1	47.5553	62.6856	51.1265	17.5816	27.2846	19.644	20.1694	20.8059	20.1559	24.204	23.8733	23.7836	GALK2
ENSOCUG00000006497	1	191.254	163.53	150.837	45.5568	52.7551	48.5095	63.0701	53.5432	53.8736	102.955	78.5376	53.3457	PXDN
ENSOCUG00000006499	1	61.0774	69.5684	63.5789	1.80759	1.69739	1.6088	1.63003	2.17219	1.75582	1.39275	2.24215	2.56277	MGARP
ENSOCUG00000006519	1	13.6048	8.66462	6.86573	0.315544	0.757076	0.521366	0.543863	0.212076	0.325192	0.671288	0.326171	0.719159	ABHD1
ENSOCUG00000006521	1	48.063	107.512	53.5953	11.3991	33.5715	20.571	27.4643	19.5608	34.0841	63.7454	42.3687	29.1858	DEPP1
ENSOCUG00000006539	1	24.2631	21.7312	19.3357	5.22777	7.43733	5.49179	5.36917	7.48516	4.49625	8.67803	7.09079	4.50263
ENSOCUG00000006540	1	3.07409	2.42315	2.07454	0.824097	1.64262	0.961154	1.06278	0.791712	0.632201	1.66505	1.00218	1.26215	PLCB2
ENSOCUG00000006573	1	10.2752	13.4339	9.30855	3.85285	6.66362	4.37524	4.92914	2.90316	4.33161	4.24038	3.59255	4.32354	SCAMP5
ENSOCUG00000006579	1	7.87899	11.2093	10.1811	1.62744	2.73857	1.73993	1.155	2.58972	0.77133	1.05532	0.478286	0.733094	SPHK1
ENSOCUG00000006661	1	78.8821	111.749	93.4365	29.6683	45.7534	37.7883	23.1698	16.9264	18.185	15.7547	15.3915	19.4676	TRIM47
ENSOCUG00000006702	1	17.4803	20.488	22.9569	0.211017	0.75943	0.832906	0.636479	0.567295	0.751255	1.08148	1.21786	0.423219	GPR37
ENSOCUG00000006714	1	236.667	244.112	225.219	80.3281	114.638	81.3424	85.5698	74.2764	74.1218	145.683	107.851	88.939	MMP2
ENSOCUG00000006719	1	6.06646	5.66939	5.99057	2.51169	3.06478	2.39661	1.7206	1.56445	1.7986	2.02349	1.50485	1.19009	LPCAT2
ENSOCUG00000006739	1	42.8391	46.096	35.1466	11.8917	17.1491	12.4979	12.0488	8.95503	11.6825	13.7153	11.9604	13.5008	NAGA
ENSOCUG00000006753	1	19.5606	22.9927	21.8483	1.66006	1.68509	1.727	1.95517	3.44014	0.933172	2.62195	3.05061	1.91695	OPTC
ENSOCUG00000006791	1	18.8315	12.6174	13.4559	4.92742	5.61825	5.70362	6.58548	5.72531	3.70879	8.31015	8.22276	4.33977	FAM161B
ENSOCUG00000006811	1	7.61213	6.86125	6.10374	2.25922	2.74435	2.57906	3.07265	2.86427	2.60922	4.63147	3.20573	1.80496	NLGN3
ENSOCUG00000006822	1	13.5375	10.7286	13.6231	5.67864	5.45139	5.05266	6.8169	7.46035	7.52897	6.79655	7.32379	4.99508	CCSAP
ENSOCUG00000006839	1	23.4213	26.3049	21.2027	2.00546	1.65083	2.56093	3.35866	3.27423	2.09504	4.30416	4.95318	3.88303	PGBD5
ENSOCUG00000006845	1	0.587201	0.908834	0.387885	0.121817	0	0	0.0629882	0	0	0	0	0	GPR55
ENSOCUG00000006859	1	7.54425	5.8619	5.6103	2.86601	3.35402	2.68162	3.69641	4.25195	3.26792	3.83591	3.40859	1.78144	FNIP2
ENSOCUG00000006861	1	2.82728	4.35357	2.67563	1.05935	1.80932	1.068	0.315657	1.43	1.97824	1.56262	2.00445	2.08208	PPP2R2B
ENSOCUG00000006872	1	163.431	186.72	168.479	63.5599	96.5635	65.6262	67.9603	61.7024	71.775	103.384	85.3367	81.076	EMILIN1
ENSOCUG00000006885	1	1.9822	1.00666	0.515565	0.173481	0.320176	0.127395	0.0598015	0.116596	0.0650129	0.26841	0.119549	0.126522	SLC3A2
ENSOCUG00000006888	1	1.34094	2.71289	1.95884	1.00146	0.712914	1.06373	0.998669	1.08174	0.844431	1.12059	0.887307	1.1347	CFAP157
ENSOCUG00000006938	1	52.2795	60.7205	51.0373	7.11342	7.99874	8.47087	10.1965	8.61116	9.32509	10.2622	11.0721	10.8466	CSDC2
ENSOCUG00000006943	1	64.7621	60.2893	53.7748	15.9855	22.2097	16.7073	21.5574	13.9036	16.9657	21.3303	16.8124	12.3814	UNC5B
ENSOCUG00000006953	1	4.35854	3.72236	3.50606	1.77208	1.92421	1.48767	2.35744	2.61906	2.05998	2.15613	2.39195	2.14563	SLC29A3
ENSOCUG00000006957	1	27.6738	22.871	22.8758	5.08042	9.96498	5.84126	6.05921	5.24641	5.78121	5.16377	3.75656	4.27318	IL1R1
ENSOCUG00000006969	1	826.162	861.37	898.745	347.311	436.883	326.449	293.915	420.386	420.398	461.993	414.356	347.24	DCN
ENSOCUG00000007014	1	42.2626	35.789	35.3144	11.315	14.7398	13.6446	15.8633	12.4215	10.8666	15.7329	14.0659	8.57095	SH3D19
ENSOCUG00000007039	1	19.3657	17.0999	11.8914	6.07906	5.82169	6.20542	8.03743	6.97698	7.8919	11.1097	10.316	10.9069
ENSOCUG00000007043	1	23.9398	27.8185	26.0531	8.76655	10.9762	9.57925	9.47684	13.2687	8.67319	10.4982	10.8741	9.87167
ENSOCUG00000007053	1	5.47274	5.43981	4.13031	0.0917792	0.101632	0.0336988	0.221463	0.0925267	0.206368	0.390501	0.18974	0.334679	CYP21A2
ENSOCUG00000007056	1	7.75497	7.09977	4.28073	0.811269	1.11226	0.544686	0.99877	1.26965	0.946824	3.49661	2.42792	1.14108
ENSOCUG00000007089	1	97.5079	101.312	68.8477	28.669	32.8354	29.6455	29.5389	27.752	32.7644	44.2072	37.8189	36.3565	PLK2
ENSOCUG00000007104	1	0.465957	0.591593	0.45015	0.231089	0.286003	0.194655	0.379555	0.178154	0.305653	0.189286	0.210769	0.104096	RTL9
ENSOCUG00000007131	1	2.63323	4.10041	3.97097	0	0.265575	0.132087	0.186012	0.241781	0.0674073	0.139148	0.309881	0.131182	FAM187B
ENSOCUG00000007162	1	20.6059	19.4345	23.7164	5.3956	7.76081	6.91237	7.06575	11.9729	6.29684	6.15896	8.54783	3.72122	ELL2
ENSOCUG00000007190	1	27.1242	27.2929	23.7796	7.88884	13.4291	7.95703	9.22993	7.67239	6.76488	9.17214	9.44964	10.3562
ENSOCUG00000007194	1	0.368668	0.389047	0.209214	0.0938639	0.129926	0.137857	0.190093	0.126171	0.131909	0.108919	0.157666	0.111241	CSMD2
ENSOCUG00000007237	1	86.9788	89.9601	88.7254	22.4573	16.8226	23.1365	29.0984	31.3412	26.5846	30.9136	29.1763	31.4562	HSD17B11
ENSOCUG00000007262	1	8.30446	7.16811	11.2034	1.83875	2.42137	2.57283	2.62103	3.05615	2.23485	2.07602	2.26027	1.63098	BEND6
ENSOCUG00000007302	1	5.20422	5.98318	4.1714	1.31936	1.82196	2.68434	1.86202	2.08123	1.39606	2.97192	2.32648	1.51127	CILP
ENSOCUG00000007303	1	1.54585	1.04193	1.66017	0.139657	0.05155	0.358948	0.240709	0.234658	0.52337	0.324115	0.19248	0.0509269
ENSOCUG00000007336	1	40.3743	31.146	39.6575	16.5845	15.6759	17.3087	20.8265	21.1278	18.586	20.3268	19.5257	13.3305	TMX4
ENSOCUG00000007359	1	3.39372	3.42561	2.98254	0.64938	0.501187	0.281786	0.671551	0.575315	0.464592	0.890546	0.650908	0.452074	GRM3
ENSOCUG00000007362	1	9.20039	6.98885	5.00535	2.51668	4.35179	3.09914	3.26326	3.31785	2.95999	4.91218	3.10171	2.10371	PRKCA
ENSOCUG00000007392	1	1.09264	1.37404	1.1909	0.170005	0	0.561789	0.791139	0.342778	0.573389	0.197273	0.17573	0.18598	CLEC12B
ENSOCUG00000007442	1	0.752167	0.306159	0.476207	0.264458	0.222161	0.050225	0.405515	0.312579	0.246058	0.486769	0.461891	0.169595	KCNG4
ENSOCUG00000007460	1	3.38207	7.96904	5.64189	0.376992	8.45366	0.207632	0.292398	0.522586	0.582778	1.14834	0.584533	0.360866
ENSOCUG00000007461	1	44.7404	32.0944	29.4247	10.1454	12.9678	11.5728	16.1569	13.2563	11.2638	24.236	17.38	10.2068	NAV1
ENSOCUG00000007471	1	3.87327	4.33553	1.97374	0.774828	0.572007	1.28023	0.534188	0.650949	0.29037	0.449554	0.400461	1.13019
ENSOCUG00000007472	1	332.921	300.31	260.601	16.9681	35.8005	18.4483	23.078	27.6896	26.6479	69.9485	44.0195	25.5206
ENSOCUG00000007492	1	19.5161	19.7201	16.9084	2.06976	2.21897	1.91684	2.53579	2.08661	1.88231	2.0346	2.45289	2.50943	LMOD1
ENSOCUG00000007495	1	6.57665	14.1778	10.054	1.5349	3.39936	1.44919	3.62812	2.21057	0.493036	1.52665	4.75977	3.83802	RNASE1
ENSOCUG00000007504	1	13.9818	17.3261	14.62	2.18243	5.36793	3.74467	2.84288	2.64448	1.8874	3.48217	2.73315	2.18091	VSTM4
ENSOCUG00000007555	1	4.36893	4.12679	3.74327	0.879696	0.332092	0.506523	0.868379	0.806237	0.696801	0.719198	0.74399	0.699899	PGLYRP2
ENSOCUG00000007567	1	2.03467	2.10513	1.94592	0.743263	0.182902	0.500327	0.469724	0.541173	0.835623	0.479156	0.554879	0.361382	SLC38A11
ENSOCUG00000007574	1	18.7286	40.18	29.5446	15.6952	7.92331	9.91548	13.3668	11.8091	8.69301	7.16454	14.1361	7.25941	KLK7
ENSOCUG00000007602	1	6.8352	8.86553	6.77922	0.742693	2.93331	0.913532	1.04967	1.01704	1.23855	1.98936	1.50982	1.69945	HS3ST1
ENSOCUG00000007603	1	32.6703	29.3301	19.603	7.26507	13.8306	9.13284	9.61093	9.32176	10.0374	15.0132	10.9111	9.27671	CHST15
ENSOCUG00000007604	1	0.458176	0.207215	0.233477	0.055549	0.0861175	0.0305941	0.0861683	0.162404	0.137394	0.0902425	0.0918715	0.060769	AMER2
ENSOCUG00000007622	1	147.658	149.84	137.703	24.6651	37.1627	27.3632	37.7221	30.6341	29.1174	32.3407	38.9973	29.192	ADGRG1
ENSOCUG00000007635	1	26.1671	27.5829	19.9596	2.13314	6.26797	2.84436	2.72843	4.2633	3.59731	6.01452	3.70397	2.34383	NGFR
ENSOCUG00000007642	1	19.6054	15.2744	16.9536	3.00133	7.24655	4.0514	4.74215	4.35808	4.57363	5.57053	4.9622	3.38788	DEPTOR
ENSOCUG00000007668	1	13.6783	11.5171	10.032	0.848456	1.34668	0.623059	1.21377	1.19751	0.604128	1.23068	0.833178	0.464093	PTK2B
ENSOCUG00000007683	1	6.54403	5.22249	4.8518	1.48289	2.54671	2.1127	3.10377	2.37225	2.26613	2.78204	2.6618	1.57367	RALGPS1
ENSOCUG00000007759	1	5.45075	5.49746	4.40924	1.89777	2.93287	2.25123	4.27019	2.8383	2.60251	3.36375	3.9018	1.80233	USP2
ENSOCUG00000007786	1	40.6829	42.5709	36.0342	9.504	21.9832	12.126	11.5361	9.35944	8.99354	13.3704	11.9482	11.6817
ENSOCUG00000007796	1	0.890477	0.899428	1.34756	0.183534	0.0717308	0.22595	0.0893176	0.0217681	0.182065	0.33825	0.323631	0.236213	NDST4
ENSOCUG00000007817	1	1.13711	1.46138	0.965743	0.511813	0.671714	0.730814	0.705716	0.43954	0.426231	0.6379	0.587833	0.456222	KIRREL2
ENSOCUG00000007837	1	3.40731	3.42786	3.15105	0.023562	0.0521831	0.25954	0.292398	0.261293	0.10596	0.437461	0.194844	0.360866	LRRC39
ENSOCUG00000007844	1	33.3332	21.3049	24.5443	12.1937	10.9845	13.0644	17.7121	17.2998	14.9064	19.6622	18.1162	11.4666	SOS1
ENSOCUG00000007852	1	5.66465	6.0015	6.20082	2.60213	2.23083	3.00498	2.21354	2.24252	1.79303	2.7273	2.03901	2.3416
ENSOCUG00000007866	1	87.637	93.7669	86.4525	23.8127	32.5841	33.5906	32.9605	23.4748	24.1522	29.5707	31.0069	27.5413	G6PD
ENSOCUG00000007886	1	11.6881	10.7725	9.99549	3.16301	3.3704	2.41039	3.4973	3.07847	3.19821	4.61679	3.56769	2.87265	CYRIA
ENSOCUG00000007893	1	25.3272	27.1712	19.9184	12.1525	10.076	10.8679	14.586	12.2131	11.6815	17.2129	15.4823	10.9347	GPAM
ENSOCUG00000007899	1	104.272	112.632	104.891	38.4888	43.613	34.859	35.7594	35.3943	41.0736	38.8019	42.4373	42.373	NSDHL
ENSOCUG00000007901	1	39.8999	27.3373	25.9872	6.55602	12.0501	7.631	8.57909	8.20397	7.13952	9.72744	7.19372	5.88302	SEMA6D
ENSOCUG00000007929	1	29.1627	26.7659	23.7084	9.33814	17.2859	7.71033	10.746	11.0223	8.54855	12.4533	10.9653	7.75916	STAT6
ENSOCUG00000007942	1	2.11177	5.51554	1.56933	0	0	0	0	0	0	0	0.509455	0.539171	LY6G5C
ENSOCUG00000007950	1	5.24139	4.36075	4.33641	1.08838	2.19413	1.58825	1.70274	1.9319	1.80929	2.08334	1.36543	1.29242	CPEB2
ENSOCUG00000007967	1	101.415	140.795	120.078	44.6206	111.052	54.26	41.9408	43.0688	41.5229	42.5499	39.593	45.4305	FHL2
ENSOCUG00000007990	1	11.665	10.2975	10.3605	2.67021	3.5311	4.7913	4.10604	2.88702	3.33267	2.87397	2.0801	2.04056	OSBPL3
ENSOCUG00000008010	1	1.64993	1.52438	1.5214	0.691557	0.678777	0.450132	0.568884	0.744725	0.406416	0.729528	0.357423	0.481437
ENSOCUG00000008071	1	107.377	169.023	149.525	79.3775	83.5012	72.7366	65.1662	51.2495	51.4074	44.8258	47.6211	68.9074
ENSOCUG00000008117	1	1.69987	1.21875	1.20874	0.700106	0.637441	0.411295	0.482672	1.0195	0.787102	0.722134	1.19006	0.578676	CD274
ENSOCUG00000008121	1	32.1926	51.2114	41.2581	11.1321	15.6958	12.5199	9.67987	7.85254	8.19324	8.26263	6.46187	13.0924	RASL11A
ENSOCUG00000008131	1	12.4661	13.0091	10.4805	4.76087	5.92284	6.21532	5.95672	5.45145	4.22911	7.02498	3.40231	3.60077	TRIM62
ENSOCUG00000008179	1	5.37071	8.55586	3.87372	2.07779	2.5176	2.57067	1.82175	1.48755	2.01436	2.60325	1.55635	2.60247	RHBDL3
ENSOCUG00000008182	1	5.6453	5.52257	3.70804	1.48754	2.1767	1.81411	2.10971	1.28542	1.51709	2.00972	1.47174	1.54596	CCDC136
ENSOCUG00000008204	1	91.6789	78.5341	74.1399	28.8671	30.9211	29.4216	29.3606	29.0223	29.0751	36.1845	31.9215	27.4588	SOAT1
ENSOCUG00000008210	1	0.484799	0.53462	0.345861	0.0905163	0.32576	0.149558	0.0468033	0.0456267	0.076323	0.0525174	0.0467823	0.148533	CCR9
ENSOCUG00000008220	1	43.6676	32.5164	23.7544	5.19284	8.08541	5.48817	9.86966	7.2182	5.69705	13.4887	10.0368	6.14573	KIF26B
ENSOCUG00000008253	1	170.951	116.724	165.013	48.8552	78.678	39.2731	46.3378	64.4726	56.0274	69.1032	51.6293	37.6337	TFPI
ENSOCUG00000008261	1	56.6586	48.0337	64.3096	21.0331	18.6834	22.7351	26.2685	30.137	24.0424	20.1068	23.6246	21.6281	NXT2
ENSOCUG00000008267	1	38.9686	36.0245	34.7427	8.94936	10.554	11.6679	14.3791	10.9847	8.38452	11.7049	12.857	6.99705	CYP4X1
ENSOCUG00000008274	1	2.99338	1.99093	1.59682	0.385181	0.752704	0.524115	0.835716	1.18018	1.20573	1.17437	0.601133	0.39659	PROX1
ENSOCUG00000008307	1	42.7677	53.9733	50.1718	17.0215	22.0866	25.7661	21.4303	17.6163	15.1318	19.2804	22.2842	23.1144
ENSOCUG00000008316	1	21.436	15.2931	16.3023	2.19626	2.03612	2.45297	2.61985	2.05967	1.76861	3.10565	2.66091	1.89976	STRIP2
ENSOCUG00000008325	1	272.79	328.288	216.964	63.9766	78.8035	62.8617	71.0197	56.9058	59.7457	74.7361	78.9936	76.7714
ENSOCUG00000008341	1	6.10538	6.19507	5.58416	1.68066	2.69969	2.36349	2.45937	2.36405	1.83723	2.77504	2.54753	2.07115
ENSOCUG00000008355	1	30.9071	37.3369	31.5732	8.52273	11.3877	10.6438	11.3819	8.77423	9.15028	15.4437	12.2053	13.8064	ARSA
ENSOCUG00000008357	1	7.69335	8.38407	7.32852	3.7215	2.7068	3.10094	3.70654	5.13624	5.61976	6.13502	7.5801	4.80734	TMEM2A
ENSOCUG00000008497	1	4.62246	6.18428	6.80037	0.914252	0.728929	0.745227	0.945466	0.534585	0.740058	1.35795	1.22855	1.10018	TOX2
ENSOCUG00000008531	1	182.718	232.849	169.826	12.0059	7.9431	14.4015	11.7319	10.6677	8.92228	12.751	12.9887	15.1376	HSD17B3
ENSOCUG00000008543	1	3.79909	2.7685	3.19968	0.354662	0.796383	0.629406	0.876174	1.05279	0.686707	1.49758	0.824863	0.571207	TNN
ENSOCUG00000008551	1	81.5479	93.8454	73.3102	34.3563	40.0481	37.7783	32.6713	29.9658	32.3443	43.6506	42.7886	47.764	ALAS1
ENSOCUG00000008562	1	10.6965	11.6947	11.3874	4.41228	5.87172	4.6044	6.12392	5.50174	4.52542	6.10807	7.56144	6.98631	BTD
ENSOCUG00000008587	1	7.60678	7.90413	8.18405	2.41305	3.16072	2.76434	2.79489	1.98787	1.65875	2.28808	2.08097	1.85541	TNFSF4
ENSOCUG00000008623	1	37.3486	38.0584	35.0258	4.52346	3.12483	4.29581	5.80366	5.29549	4.93109	5.1877	4.87245	2.97144
ENSOCUG00000008629	1	5.53533	5.96519	5.46311	2.03941	2.03332	2.55823	2.01897	1.34629	1.4932	1.82753	1.59795	1.65146	KCNK2
ENSOCUG00000008631	1	33.5558	35.1589	40.3074	5.31796	8.6222	6.32203	7.18051	5.7659	5.79829	6.72983	6.01564	5.68597	AGFG2
ENSOCUG00000008635	1	41.5583	40.3462	37.756	16.5328	17.4707	15.8799	24.0897	19.4385	19.3907	28.9604	27.4599	15.9215
ENSOCUG00000008644	1	8.6422	8.2498	7.07611	1.23997	1.72974	1.08204	1.04916	0.990317	0.995753	1.81259	1.43154	1.60313
ENSOCUG00000008657	1	6.60168	4.47589	5.20986	0.272698	0.966314	0.420533	0.676819	1.09967	0.919751	0.569588	1.52216	0.596646
ENSOCUG00000008662	1	54.3957	50.5907	51.0935	18.3899	20.753	16.921	20.9241	16.9468	14.9512	22.4092	37.2926	21.8466	KHK
ENSOCUG00000008699	1	10.7617	9.10474	8.98316	3.30577	3.36256	3.80742	4.63241	2.6705	3.32916	5.06053	5.65435	3.66353
ENSOCUG00000008710	1	17.3554	7.36646	7.96826	4.63806	4.48618	4.84774	7.85814	7.70541	6.29725	10.8121	9.01564	3.99428	FAT4
ENSOCUG00000008757	1	8.33858	5.73295	5.41483	2.78539	3.23864	1.76823	1.82684	1.82525	1.90363	2.70481	1.90178	0.882066	MYOF
ENSOCUG00000008781	1	21.2995	15.6906	13.6368	3.3365	9.34882	3.0145	4.47391	3.52997	4.17257	6.61229	4.3944	2.43609	ADAM12
ENSOCUG00000008802	1	2.90368	3.294	2.27553	0.924107	0.955094	0.814336	0.637105	0.310544	0.5541	1.2868	1.01891	1.34793	SPX
ENSOCUG00000008805	1	20.4516	16.8143	14.7018	5.66216	5.18678	6.13555	4.43921	3.24861	6.11991	8.56015	5.80526	4.55755	CDH1
ENSOCUG00000008823	1	13.0941	13.0033	11.8684	2.72639	2.96239	3.49664	3.95785	2.98087	2.74859	3.93606	3.46653	2.95459	P2RX7
ENSOCUG00000008858	1	3.19834	4.03982	3.39492	0.205917	1.24146	0.378035	0.366742	0.172995	0.167198	0.50444	0.62673	0.225267	CORIN
ENSOCUG00000008865	1	8.42376	5.48108	6.5465	0.786946	4.29011	0.709228	0.944706	0.848834	0.754807	1.8902	1.41073	0.794673	THSD7A
ENSOCUG00000008930	1	4.69835	3.77684	4.31613	1.49604	1.33034	1.4232	1.20722	0.891223	0.522421	0.881152	0.55062	0.384359	PLPPR4
ENSOCUG00000008953	1	2.87647	2.13344	1.86202	0.304572	1.07364	0.117422	0.414711	0.788102	0.525042	0.977808	0.388289	0.266554	SYNPO2
ENSOCUG00000008959	1	120.654	166.234	167.003	0.223374	0.0618386	0.184538	0.519751	0.0562983	0	0.259203	0.173172	0.183273	MYOZ2
ENSOCUG00000008964	1	8.21173	6.12522	5.45518	2.32453	3.32988	2.76753	3.92807	2.71244	3.22503	3.31721	5.01013	3.51687	HOXD1
ENSOCUG00000008971	1	7.88518	5.82086	9.23595	2.70046	4.13643	2.76321	3.45893	10.6894	3.14391	4.39819	4.21545	2.39937	CPEB4
ENSOCUG00000008985	1	9.00431	7.72028	7.63308	2.01075	4.19256	2.7659	2.37356	2.82809	2.5363	4.27956	2.64625	2.53234	EBF1
ENSOCUG00000008996	1	14.0038	16.5859	13.1081	3.84357	4.52221	5.27827	4.56317	3.9386	4.26432	4.72415	4.1429	3.85896	SLC41A3
ENSOCUG00000009041	1	46.7763	35.1762	32.6469	15.9952	13.1821	14.6747	18.6021	16.0245	12.9507	18.7015	18.3158	10.3582	BOD1L1
ENSOCUG00000009080	1	0.637121	1.1886	0.892825	0.148695	0.258749	0.140392	0.263609	0.278397	0.095527	0.492987	0.592853	0.348575	PMFBP1
ENSOCUG00000009149	1	60.3059	61.4862	59.0339	17.5483	28.6427	19.5813	18.9233	12.8245	11.4413	16.7295	17.0941	19.911	ECHDC3
ENSOCUG00000009150	1	10.8598	11.0791	8.51958	1.98581	2.199	2.27375	1.86446	1.73857	1.55693	2.75913	2.05269	2.88703	TSKS
ENSOCUG00000009176	1	6.36322	7.32807	7.47628	1.76097	3.32804	2.5346	1.9425	2.01202	1.9798	2.8608	2.64547	2.67135
ENSOCUG00000009198	1	0.510296	0.546788	0.653424	0	0.0405789	0.121095	0.18948	0	0	0	0	0	ERMN
ENSOCUG00000009200	1	44.9388	46.6898	45.7852	10.755	8.74747	7.4961	9.90782	13.6944	11.9714	20.3459	18.3723	19.152	CYTIP
ENSOCUG00000009228	1	44.4733	44.735	34.9374	18.7077	19.9668	25.0854	24.6101	18.1349	16.9547	16.0567	13.8496	15.4176	ENC1
ENSOCUG00000009235	1	3.3397	3.13122	2.74913	0.239828	0.929511	0.264174	0.992064	0.120891	0.134815	0.556591	0.619761	0	LEMD1
ENSOCUG00000009332	1	1.9212	1.73164	1.93498	0.168803	0.373849	0.255666	0.523697	0.29781	0.355834	0.51418	0.23992	0.392413	MCOLN3
ENSOCUG00000009356	1	9.13437	5.78895	6.32294	3.29375	3.05992	3.47114	4.094	3.7596	3.86327	5.02564	4.65688	3.07491	PKDREJ
ENSOCUG00000009395	1	18.9314	16.3677	16.5889	1.31306	1.35468	1.49128	1.53501	1.93219	2.88827	2.46059	1.76194	1.26693	CNTN1
ENSOCUG00000009404	1	6.82514	5.74937	5.2415	0.127114	0.10557	0.0700089	0.115022	0.128149	0.125045	0.0368756	0.0164243	0	KIF19
ENSOCUG00000009427	1	41.1881	27.6997	28.708	1.72723	5.41497	1.54978	2.31851	2.04689	2.09618	3.68335	2.22879	1.48285	LAMA2
ENSOCUG00000009532	1	6.04146	3.73007	4.63445	1.72203	2.14585	1.72907	2.4459	2.41853	1.70769	3.22075	2.55851	1.34693	AFF3
ENSOCUG00000009592	1	0.456073	0.373703	0.143544	0.0626124	0.0416005	0.0275874	0.0518001	0	0.0422356	0.0145311	0.0129442	0.0410977	COL19A1
ENSOCUG00000009597	1	8.7983	9.58219	6.34143	0.126851	0.0702346	0.209593	0.295159	0.0639421	0.320881	0.147198	0.0655615	0.173464	CEL
ENSOCUG00000009616	1	83.0751	82.9027	91.2178	24.2976	30.8067	23.6766	27.3438	27.155	27.2494	29.7602	25.6116	22.383	CRISPLD1
ENSOCUG00000009676	1	329.721	404.407	383.723	173.506	207.407	155.135	147.147	144.912	149.36	190.384	150.083	158.043
ENSOCUG00000009679	1	175.041	216.883	163.098	87.3146	58.5329	96.5208	103.435	41.3502	37.1465	51.441	64.8809	70.2894	THEM5
ENSOCUG00000009694	1	21.4829	14.417	15.8433	4.42115	7.09097	5.94302	7.58729	6.6205	5.60621	8.33179	5.87275	3.83799	SRGAP1
ENSOCUG00000009702	1	20.3859	20.6199	19.7091	4.61921	5.78007	3.40905	4.06038	4.09801	3.68717	9.48741	3.91531	4.14369	FMOD
ENSOCUG00000009707	1	50.4517	47.1549	34.159	6.78725	11.6934	5.77052	6.83158	8.40369	7.24171	21.1044	12.5161	11.1015	PRELP
ENSOCUG00000009718	1	26.8092	19.5742	18.8559	2.0089	5.39458	2.9566	3.8145	3.30793	2.911	6.44945	4.59727	2.66164	STOX2
ENSOCUG00000009732	1	2.02329	2.34864	2.96706	0.865713	1.72557	0.780216	1.96959	1.42816	1.22103	1.69864	2.11514	1.61862	NR1D1
ENSOCUG00000009781	1	1.17128	0.768488	2.05874	0	0.21058	0	0.196657	0.0479283	0.160346	0.110333	0	0.104017	SNX31
ENSOCUG00000009790	1	3.64565	2.48369	3.51184	0.441347	0.780956	0.340807	0.710501	0.550442	0.813341	0.781406	0.634931	0.368337	ERBB4
ENSOCUG00000009809	1	4.77975	6.71643	5.60843	3.99241	2.40555	3.75099	2.48938	3.55141	2.6403	3.40646	3.58066	1.22035
ENSOCUG00000009837	1	30.7293	39.2741	31.8542	10.7638	14.7778	12.9026	13.8007	12.2999	9.50034	16.4747	14.4742	12.4679	RMC1
ENSOCUG00000009838	1	9.90809	6.57122	8.42608	1.82654	2.94144	2.18985	2.39568	2.2737	2.26637	3.19865	2.75725	1.57783	FIGN
ENSOCUG00000009839	1	56.7352	67.4367	52.3819	17.9397	22.6765	21.1858	23.1208	18.9224	19.0713	18.9195	23.7916	20.5333	HDAC11
ENSOCUG00000009843	1	5.73115	3.56244	5.20242	1.93301	1.5162	2.50946	2.9747	2.07634	2.06972	2.80382	2.31923	1.72445	SPOCK1
ENSOCUG00000009850	1	29.7185	23.9447	23.5972	6.59159	8.64177	7.72751	8.38689	7.1318	7.01367	10.5582	8.22495	5.56277	NPC1
ENSOCUG00000009858	1	9.82186	9.25684	6.69951	1.66712	2.89645	1.55141	1.45651	1.39092	0.969453	1.33415	1.51528	1.132	KLHL3
ENSOCUG00000009877	1	1.92289	2.96931	2.91563	1.43279	0.838897	1.17915	1.29437	0.564502	0.685067	1.12752	0.73201	1.27917
ENSOCUG00000009885	1	0.912997	0.99747	0.606642	0.501367	0.305355	0.138066	0.31109	0.353815	0.197284	0.261803	0.259126	0.13712	SLC13A5
ENSOCUG00000009939	1	0.455565	0.245064	0.25102	0.0103729	0	0.011426	0.0214542	0	0.0116619	0.0361102	0.0428891	0.0453908	MYPN
ENSOCUG00000009941	1	14.5644	14.2515	12.4685	1.67187	1.2045	1.48659	1.64563	1.62457	1.04172	1.82316	1.72817	1.32215	RUBCNL
ENSOCUG00000009967	1	61.1507	77.8766	63.082	22.2624	49.564	31.5997	20.0447	15.0048	18.5339	20.0485	17.5056	17.9164	PLAT
ENSOCUG00000009990	1	22.6939	19.0498	16.7349	8.03598	15.0187	4.29177	10.0403	9.59576	10.4153	17.839	14.7527	8.98803	ITGA3
ENSOCUG00000009996	1	4.62586	5.7456	5.55523	1.68419	3.53872	2.23571	2.14362	1.91559	1.60217	2.35522	2.1873	3.21249
ENSOCUG00000009998	1	13.9549	13.0444	12.5318	1.85128	3.79634	3.96514	3.15536	4.52765	2.00424	2.78473	3.15394	1.83772	SGMS2
ENSOCUG00000010024	1	132.25	137.229	121.77	45.8936	89.303	47.9624	55.9636	51.3587	46.3268	57.8515	44.9922	45.234
ENSOCUG00000010082	1	1.58678	1.38146	0.943357	0.694374	0.563874	0.382433	0.574465	0.280012	0.286241	0.456592	0.717759	0.227888	CFAP221
ENSOCUG00000010093	1	43.2864	49.3309	40.1445	21.4165	18.784	20.8492	21.3011	20.1053	17.1563	23.4457	24.338	26.3487
ENSOCUG00000010097	1	1.45478	1.95535	1.46964	0.336972	0.58799	0.303693	0.538554	0.422071	0.390324	0.722796	0.538312	0.390979
ENSOCUG00000010109	1	6.01595	6.18066	5.17981	1.26525	1.78709	1.25148	1.50872	3.14984	2.04662	1.85771	1.9351	1.58188	BIRC3
ENSOCUG00000010122	1	25.3397	54.1389	24.0757	16.0249	25.6883	20.0532	21.3068	15.452	9.16739	13.8389	23.1002	12.4504	A1BG
ENSOCUG00000010126	1	55.9405	61.9377	56.6644	21.1165	29.4869	26.182	23.3693	19.1701	19.7515	26.9819	26.2965	19.3701	ST3GAL5
ENSOCUG00000010134	1	34.2085	33.1435	31.3138	9.75562	18.5164	10.3232	9.94346	10.0333	10.0521	11.1031	8.88412	7.81479	ITPRID2
ENSOCUG00000010145	1	88.5481	87.1842	75.6439	17.8212	31.4566	26.8144	27.3883	23.5422	23.4679	33.3774	29.5685	29.8836
ENSOCUG00000010159	1	15.4201	16.0593	10.184	5.1951	4.25838	6.47377	4.29198	2.42852	2.78981	5.64109	3.88504	5.90554	FADS6
ENSOCUG00000010167	1	4.39429	3.76883	2.86205	0.130646	0.839092	0.129517	0.135106	0.118539	0.14688	0.151601	0.14855	0.0857534	AVPR1A
ENSOCUG00000010280	1	415.694	438.843	401.839	138.364	174.923	149.093	149.677	135.614	142.196	178.091	165.675	159.808	PGRMC1
ENSOCUG00000010286	1	9.03755	5.69863	5.54649	0.608526	0.638758	0.614443	0.753851	0.44094	0.377704	0.639932	0.648676	0.540889	DOCK3
ENSOCUG00000010325	1	5.93972	6.66078	6.80087	2.90941	2.29313	2.80888	3.00874	2.86409	3.30942	3.61438	3.11353	2.63986	SLAIN1
ENSOCUG00000010338	1	57.8498	82.6871	68.7845	29.1322	35.0895	32.9654	31.1252	25.6482	23.431	26.8199	28.0588	32.6153
ENSOCUG00000010357	1	7.31121	6.87812	7.11693	1.53758	3.48834	1.28058	1.60946	2.04159	2.9935	3.35081	2.46157	1.60001	MBOAT1
ENSOCUG00000010371	1	32.5767	28.4306	33.5543	3.82424	11.248	2.91975	3.51538	4.91612	6.00557	9.62662	5.73084	7.70314	FRZB
ENSOCUG00000010372	1	69.4339	60.5186	62.2953	4.73097	3.18074	2.41951	6.43749	5.33431	5.51881	6.75907	7.64798	4.71831	MAP3K21
ENSOCUG00000010373	1	38.2043	52.4399	51.6016	19.3321	21.5488	18.7294	21.1467	32.0966	19.0803	24.802	29.447	27.954	SIAH2
ENSOCUG00000010379	1	171.166	115.385	128.994	22.4179	34.6355	21.3098	25.7675	29.3411	22.0401	32.7538	20.5685	15.4987	FREM1
ENSOCUG00000010383	1	31.7466	33.7832	20.4923	6.83548	13.745	6.27903	5.12938	5.74677	4.32794	7.41644	6.45349	7.36983	CD68
ENSOCUG00000010392	1	29.672	57.7397	28.31	8.29325	12.6785	11.4652	5.34722	2.471	4.15229	4.40264	4.65069	6.68505	DPEP1
ENSOCUG00000010435	1	10.0129	10.4773	11.1062	3.05797	3.60807	3.76555	3.7838	3.52713	2.14685	3.7344	4.52748	3.00933	SUSD1
ENSOCUG00000010524	1	244.858	253.203	256.151	12.2977	16.6839	11.4865	20.0803	9.53401	12.6939	5.8416	12.7118	16.6003
ENSOCUG00000010528	1	0.377472	0.328629	0.426381	0.211432	0.117065	0.135856	0.127546	0.106577	0.118853	0.163564	0.0182127	0.0578252	PDE6C
ENSOCUG00000010534	1	5.40957	3.88461	3.64266	0.747205	0.599167	0.908202	1.24567	1.68191	1.39043	1.49492	1.23179	0.782186	DLG2
ENSOCUG00000010547	1	4.90794	4.85842	5.02513	1.7309	1.7335	1.85053	2.05323	2.98958	1.87444	2.85034	3.05214	1.79609	HLF
ENSOCUG00000010579	1	143.786	139.022	128.112	54.2273	74.3516	72.065	76.9338	57.5928	54.5329	75.0172	68.7655	48.7964	ABAT
ENSOCUG00000010594	1	4.62564	4.41253	4.38364	0.342039	1.18362	0.423856	0.265287	0.624994	0.408575	0.496126	0.441947	0.631429	CASQ2
ENSOCUG00000010621	1	4.90553	5.03733	3.66418	1.02746	3.21824	1.64914	0.728598	2.60436	1.02312	1.49884	1.6993	0.963437	BTK
ENSOCUG00000010656	1	8.68953	7.00584	7.07303	3.08794	3.67453	3.1614	3.74706	4.13614	3.17068	4.9414	4.34386	2.75834	TTC39B
ENSOCUG00000010707	1	28.5539	25.0988	20.7991	6.54142	12.8058	6.85808	9.37402	7.21884	6.1198	14.1647	10.7946	7.97397	PEAR1
ENSOCUG00000010729	1	64.7417	87.6561	69.0148	7.56283	21.007	8.95887	9.37213	8.71058	7.00633	10.1241	8.27609	7.02555	RASL12
ENSOCUG00000010782	1	28.8687	23.4142	24.3197	10.2757	8.75583	7.63973	10.7498	9.50895	11.131	16.0567	11.3439	9.40501	LRRC8C
ENSOCUG00000010814	1	35.1985	37.606	33.5842	8.80017	5.95424	6.20742	8.85015	12.8438	13.1795	16.1701	21.2308	18.6007	ME1
ENSOCUG00000010820	1	6.61183	4.8367	5.16242	1.85772	2.93191	2.07632	2.88454	2.92187	2.40706	3.5275	2.77625	1.32308	MAML2
ENSOCUG00000010843	1	48.1924	44.2462	36.6008	12.2935	19.6636	17.2173	17.2728	11.9753	10.9442	21.709	20.0532	15.7186	PRKCD
ENSOCUG00000010852	1	3.64834	4.37737	3.24434	1.25932	1.33113	0.504422	1.12473	1.4427	2.12371	1.59416	2.18927	1.40897	HSPB7
ENSOCUG00000010880	1	28.9033	38.6537	35.6314	13.8473	17.2428	15.1498	13.3124	12.6755	10.9545	15.1334	17.5482	17.4444	ARSK
ENSOCUG00000010895	1	24.3292	20.5001	15.5368	6.85168	9.59281	8.00198	8.44213	7.05516	6.38555	12.7334	9.52582	6.59957	SVIL
ENSOCUG00000010917	1	0.410649	0.317789	0.716129	0.0255573	0	0.0844554	0.0264299	0.0772963	0.0574662	0.0296566	0.13209	0.0559179	SBSN
ENSOCUG00000010918	1	19.2628	13.8284	14.4472	3.97149	6.25426	4.82722	6.23633	5.84627	4.99592	6.5374	5.00342	3.1255
ENSOCUG00000010919	1	5.37352	4.16556	5.55345	2.31394	1.72098	2.38716	2.73224	3.21193	2.78591	2.8454	2.20445	2.55028	PABPC5
ENSOCUG00000010941	1	0.55774	0.304672	0.286071	0.0102093	0.0678321	0	0.0316736	0.298481	0.0344338	0.0236937	0.0316594	0.0223374	CPXM2
ENSOCUG00000010987	1	23.7931	24.3483	28.2327	9.93246	11.8777	8.38043	10.4123	8.0244	9.50952	9.81518	8.08698	5.54454	TMEM26
ENSOCUG00000011000	1	8.72477	10.0678	6.82387	2.38566	4.8299	2.53936	3.65497	2.77759	3.242	3.42077	3.08872	2.38137	GAS7
ENSOCUG00000011014	1	58.0089	60.2884	57.7994	17.0525	49.4485	14.462	16.6603	13.9835	14.3786	26.9391	17.6108	18.2156	P3H2
ENSOCUG00000011018	1	3.29625	3.13343	1.55054	0.791482	0.955058	0.844464	1.27731	0.987571	0.849931	1.37559	1.31709	0.473699
ENSOCUG00000011032	1	3.37852	1.99305	2.8976	0.723869	1.14511	0.227815	0.641643	0.469134	0.697559	1.01997	0.587908	1.07471	CMTM5
ENSOCUG00000011037	1	11.6897	7.36012	4.87818	0.989581	0.771131	0.524834	1.26973	0.443396	0.947726	1.41412	1.05132	0.912168	MYH7
ENSOCUG00000011051	1	3.43779	5.29189	5.06507	0.279072	0.618065	0.153701	0.36075	0.140673	0.627501	0.485752	0.360588	0.152649	TNFSF11
ENSOCUG00000011091	1	16.8998	18.4783	17.3541	4.54353	8.55552	4.95864	4.32514	4.64385	3.76046	6.06192	5.02118	3.46445	GALNT1
ENSOCUG00000011092	1	23.8899	18.07	15.2344	5.71685	12.317	6.52544	8.71708	6.41856	7.5708	14.3496	9.71591	6.70741	FLT4
ENSOCUG00000011096	1	53.2802	49.9949	48.6863	9.01814	17.0189	12.5639	12.9579	12.581	10.5386	17.3403	12.8865	9.0805	MGAT5
ENSOCUG00000011128	1	26.8418	22.5093	21.7553	1.47223	4.17552	1.42311	0.93214	1.06016	0.574244	1.98729	1.25782	1.10111	GLI1
ENSOCUG00000011143	1	2.21782	2.59396	1.85791	0.768569	0.885817	0.570154	0.600162	0.72739	0.476122	0.910047	0.713386	1.32125	FOSL1
ENSOCUG00000011172	1	19.5081	16.6357	16.7022	1.5029	1.86004	1.91516	1.82849	0.980387	1.15957	1.26523	0.304611	0.419093	OPCML
ENSOCUG00000011179	1	1.87331	1.90273	2.01858	0.218602	0.363105	0.120397	0.282582	0.385669	0.184324	0.380498	0.169473	0.239144	TNMD
ENSOCUG00000011186	1	17.564	11.6926	13.3748	4.4051	6.44653	4.72976	5.34542	5.42786	4.76072	6.17875	5.2127	3.28572	SRPX2
ENSOCUG00000011191	1	2.50329	2.14022	1.6219	0.741661	1.31715	0.693638	0.781454	0.57841	0.582101	0.714478	0.448411	0.535801	CARD11
ENSOCUG00000011211	1	2.65207	3.66492	1.80192	1.13966	1.26201	2.07784	1.62562	0.950852	1.01619	1.14006	0.771823	1.16078	CKMT2
ENSOCUG00000011224	1	12.3252	10.7924	9.26804	2.81611	3.64205	3.5534	4.92258	3.58588	3.07744	4.81025	4.48046	2.30481	RNF24
ENSOCUG00000011227	1	95.6596	83.7943	84.9876	4.8974	3.61083	8.66983	5.98191	10.7688	9.86015	11.4238	8.74284	8.56944
ENSOCUG00000011234	1	0.91093	1.07564	0.952393	0	0	0	0.0151625	0	0.0164839	0.0170137	0.0303115	0	FSHR
ENSOCUG00000011273	1	18.77	16.4255	15.8282	2.42729	3.87632	2.78419	8.96191	5.40983	3.41678	6.157	7.73447	4.04892	KIF5A
ENSOCUG00000011296	1	0.83205	0.965848	0.670187	0	0	0	0.0777363	0	0.0563404	0.0290757	0.103602	0.0548225
ENSOCUG00000011330	1	47.8885	43.8918	42.8402	11.2719	18.1364	10.0706	11.9525	12.8055	10.5882	15.5262	13.2722	10.2334	SKAP2
ENSOCUG00000011339	1	23.1627	23.4077	24.9214	10.2048	12.4702	11.3151	11.2041	11.387	10.8411	11.6852	11.8032	10.1556	SC5D
ENSOCUG00000011348	1	85.5277	112.641	99.1481	39.5926	55.0365	44.2374	52.8776	38.4494	44.7933	60.045	51.3746	56.1108	CHPF
ENSOCUG00000011353	1	85.3074	96.0408	85.0477	11.7313	15.2903	19.0715	20.1919	11.5278	19.0711	25.7552	27.2914	27.2606	INHA
ENSOCUG00000011383	1	5.3157	3.41897	4.57641	1.47887	1.63764	1.56867	1.84657	2.83826	2.52475	1.88133	1.84574	1.43808	FAM241A
ENSOCUG00000011396	1	1.80383	1.06748	0.448583	0.0660374	0.28032	0.0606178	0.147966	0.0998628	0.160861	0.114944	0.0796382	0.024081	XIRP1
ENSOCUG00000011415	1	52.2305	50.3874	45.229	5.68971	15.6781	4.68226	7.64573	7.77034	6.56408	9.51963	9.2494	4.5959	TGFB3
ENSOCUG00000011444	1	0.642968	0.559771	2.10238	0	0	0.0826467	0	0.075641	0.0843533	0.174129	0.155113	0
ENSOCUG00000011452	1	6.654	5.27363	4.63791	1.3923	2.44312	0.849403	1.12972	0.755807	0.891024	1.19308	0.79709	1.07791
ENSOCUG00000011514	1	9.96885	8.13209	10.2077	1.56201	2.01259	1.5437	1.7663	1.73662	2.06794	1.9396	2.16539	1.70081	MFAP3L
ENSOCUG00000011533	1	53.0007	48.1702	45.3299	23.6127	33.2682	20.3637	21.7208	22.6758	23.6433	24.0821	21.6974	18.5953	RHOBTB1
ENSOCUG00000011599	1	4.72759	2.84124	2.86757	0.779058	1.7873	1.14556	1.38773	1.27017	1.00997	2.26653	1.64912	1.02354	CACNA1C
ENSOCUG00000011639	1	69.7606	70.0837	63.7022	19.1852	17.345	26.201	9.53094	10.8375	11.7984	10.2167	9.79088	10.16	SOX9
ENSOCUG00000011691	1	12.7735	7.60195	8.018	4.6609	5.09424	3.30047	5.38341	10.6487	7.14555	3.89833	4.63016	1.7217	STK17B
ENSOCUG00000011697	1	16.3359	15.296	14.6149	1.87544	7.36436	1.98428	1.67152	1.74145	1.40103	2.34806	2.56354	2.5106	VCAM1
ENSOCUG00000011714	1	296.541	385.506	322.734	105.762	154.734	118.618	119.139	84.3042	99.3106	122.649	106.009	96.6107	CLPTM1
ENSOCUG00000011745	1	31.9277	30.5488	29.4394	16.4967	13.5821	12.7918	16.4045	14.7518	15.6336	16.8715	20.3471	16.7826	HSPA2
ENSOCUG00000011749	1	17.2175	17.3183	17.9611	5.73982	7.48305	6.01951	6.65643	5.75884	5.72117	7.58613	6.9662	4.93509	AHCYL2
ENSOCUG00000011779	1	38.3971	35.9253	30.7005	13.3371	16.0197	13.1957	13.6317	15.6188	17.9769	19.3244	15.6823	14.443	TNFRSF19
ENSOCUG00000011787	1	1.89711	2.93623	5.4638	0.236138	0.087163	0.346814	0.2849	0	0.0884937	0.274014	0	0.0430547	ANXA13
ENSOCUG00000011808	1	9.6584	7.98718	6.33178	1.28914	3.01915	1.92598	1.89246	2.13618	2.25729	3.32711	2.52725	1.68585	STARD13
ENSOCUG00000011878	1	10.9657	14.2918	15.9197	5.18705	3.82084	4.3041	4.72612	3.84711	4.059	5.06448	4.18074	4.3746	SLC35F2
ENSOCUG00000011919	1	27.5766	21.6519	23.925	10.8889	9.10238	9.28917	16.4645	14.9294	18.3681	24.4213	24.8101	14.5175	SEMA3A
ENSOCUG00000011932	1	48.6104	33.7853	41.7159	18.7596	21.198	18.3766	22.0954	22.5727	20.9184	29.7985	22.5825	17.6713	SEL1L
ENSOCUG00000011941	1	12.4266	12.0406	9.60607	3.22776	4.63594	4.11867	4.89127	3.3507	3.66478	3.59715	2.87398	3.81076	HVCN1
ENSOCUG00000011942	1	45.4642	28.3943	23.8393	13.1521	18.645	13.452	17.9814	14.6182	12.6105	25.4863	18.8426	10.0993	FLNC
ENSOCUG00000011944	1	8.84422	10.4631	8.32459	0.444959	1.50008	0.904018	0.501053	0.368835	0.566951	1.27361	1.01188	1.41705	ENPP6
ENSOCUG00000011954	1	17.9617	12.8287	11.2503	4.87328	6.93287	5.11042	7.95447	5.12357	5.4508	6.65713	6.47159	3.74516	UNC13B
ENSOCUG00000011971	1	21.475	19.5236	20.3205	8.61365	8.33707	9.81471	12.9839	11.1045	9.48073	13.52	14.2938	8.9642	DCP1A
ENSOCUG00000012005	1	12.845	17.6174	15.9074	2.58276	3.28904	3.04817	3.43407	2.86418	3.31851	6.03687	4.1381	4.92438	ME3
ENSOCUG00000012007	1	28.6614	25.1338	24.1731	6.03066	8.05976	6.15421	6.83871	5.91206	5.1279	8.07581	7.10792	5.74805	PRR5L
ENSOCUG00000012033	1	79.1744	100.123	89.516	8.11736	8.08541	14.0187	11.7692	3.45433	11.7859	13.6794	6.95714	13.0748
ENSOCUG00000012034	1	13.1772	12.3932	13.268	1.97915	5.48561	2.89805	2.14477	1.5771	1.85201	2.90169	2.84207	2.21699	RBM47
ENSOCUG00000012043	1	9.67683	9.73741	7.91459	1.8709	1.98296	1.92834	2.57048	1.68405	1.90806	2.45011	2.50026	1.33036	CAMKK1
ENSOCUG00000012056	1	3.06352	3.68407	3.69499	0.473226	0.41011	0.36262	0.574493	0.290397	0.717084	0.787882	0.93579	0.945357
ENSOCUG00000012067	1	3.14513	4.23973	3.16058	0.0189427	0.125858	0.208657	0.156715	0.019097	0	0.307734	0.137064	0.186505	SOX1
ENSOCUG00000012087	1	5.89165	6.97449	7.144	1.27973	3.94983	1.9795	2.64684	3.76066	3.27546	3.6019	3.37743	3.36593	EFHC1
ENSOCUG00000012120	1	122.365	108.892	82.9936	24.1178	43.6349	22.4762	23.6613	28.4958	27.3403	49.3737	37.9309	18.4067	SPARC
ENSOCUG00000012125	1	1.82203	1.49814	1.89562	0.177182	0.902533	0.175652	0.164908	0.0893123	0.139439	0.575683	0.219778	0.0193831	SERTM1
ENSOCUG00000012159	1	0.954882	0.994329	1.10198	0.406385	0.537111	0.27436	0.623611	0.383262	0.221072	0.562839	0.514925	0.215116	TMEM132E
ENSOCUG00000012196	1	4.69179	4.36302	4.19167	2.1295	2.00975	3.09203	2.37738	1.02463	0.870587	1.7129	1.25069	1.35011	TRIM5
ENSOCUG00000012201	1	66.8427	66.1675	55.7117	28.0295	20.5948	25.5463	25.4341	19.9792	22.5089	23.1852	22.7753	14.8981	PPAT
ENSOCUG00000012229	1	4.12398	4.05914	3.20873	1.41932	1.72887	1.38753	1.41274	1.09105	1.2965	1.4617	1.54048	1.12571	DLGAP3
ENSOCUG00000012233	1	14.3793	16.0679	12.6254	0.791962	1.98783	1.19222	0.737101	0.798412	0.682619	1.25595	1.02329	0.851944	GGT5
ENSOCUG00000012238	1	25.6295	15.7081	14.1869	2.51041	2.23586	3.67713	3.20861	2.91082	3.14772	3.1708	1.1479	1.67135	NWD2
ENSOCUG00000012264	1	1061.62	869.302	690.487	204.018	504.514	142.373	210.314	264.129	296.723	589.984	350.703	228.856	COL1A2
ENSOCUG00000012279	1	26.3918	22.3528	21.6241	8.77985	7.1992	9.31336	14.1383	10.6744	9.53837	12.9785	11.07	7.03263	ARMH4
ENSOCUG00000012280	1	15.0679	19.3366	20.0767	4.66528	5.36181	4.59385	8.07749	5.91473	5.56288	10.212	11.3619	6.4956	GPC5
ENSOCUG00000012313	1	1.94158	2.98696	1.52978	0.32757	0.798019	0.745702	0.542006	0.374269	0.883858	1.4951	1.67043	0.549473
ENSOCUG00000012318	1	0.466306	0.481148	0.143746	0.0322458	0.071415	0.0177596	0.05002	0.113779	0.0906317	0.243216	0	0.0705518	CNNM1
ENSOCUG00000012328	1	14.0992	17.958	17.6675	7.57566	7.60368	8.15419	7.78064	7.02706	7.58365	9.69393	9.99408	10.9933	RNF128
ENSOCUG00000012333	1	52.8976	68.2402	54.104	26.5279	29.758	25.1474	27.714	23.8359	26.609	31.5839	34.8882	37.7593	GOT1
ENSOCUG00000012349	1	10.7034	9.38584	6.33969	1.38059	1.35308	2.49962	2.76793	2.05309	1.75434	5.56109	5.41309	2.93964
ENSOCUG00000012353	1	13.5402	17.4015	10.3497	5.47372	13.185	5.90507	2.62605	1.93425	2.66457	2.48829	2.79986	3.39531	SDSL
ENSOCUG00000012367	1	23.4149	22.051	19.836	0.405996	0.0539499	0.769204	0.218326	0.114605	0.0912892	0.131913	0.0503603	0.0355318	COL9A1
ENSOCUG00000012389	1	12.725	11.6745	13.3758	4.88176	6.00378	5.66867	6.0171	7.14343	5.71138	9.44983	6.97123	6.7992	CCDC126
ENSOCUG00000012432	1	13.3052	14.2678	13.1138	5.55373	8.50297	6.24519	7.17168	5.31657	5.34256	5.14442	4.40291	4.4801	HS3ST3B1
ENSOCUG00000012489	1	21.9203	21.3995	18.5234	3.03345	4.4156	4.66179	3.32676	2.70055	2.70906	5.45034	4.62755	4.41575	PTCH2
ENSOCUG00000012527	1	4.49065	3.90346	3.44684	2.56847	1.6564	1.51759	2.06591	3.00607	2.46721	2.50084	1.97343	1.19499	SLC26A7
ENSOCUG00000012541	1	3.28579	4.2265	4.54041	0.580324	0.918036	0.365278	0.600137	0.501472	0.559231	1.73162	0.942649	0.544164	SOSTDC1
ENSOCUG00000012542	1	1.78974	2.92552	2.19318	0.647862	0.755173	0.600953	0.687613	0.687514	0.383351	0.692427	0.528695	0.652789	CACNA2D3
ENSOCUG00000012556	1	5.86218	7.25174	5.02482	0.645278	0.823092	0.773765	0.861589	0.831694	0.707095	1.27956	0.996292	0.786336	NFATC2
ENSOCUG00000012557	1	7.41499	5.98677	8.31751	1.30608	2.68222	1.19017	1.95847	2.77109	2.04238	2.65225	2.40557	1.50675	SOX6
ENSOCUG00000012561	1	64.9368	65.9141	65.6097	14.9135	15.8475	16.6486	18.7639	21.2366	14.8991	21.6902	22.2273	16.0154	SLC43A3
ENSOCUG00000012591	1	49.9332	63.081	57.5792	24.3101	26.9199	15.0747	23.1754	35.8222	26.619	29.7199	41.8934	33.8301	UCP2
ENSOCUG00000012601	1	0.861618	1.1214	1.21075	0.292494	0.269912	0.456432	0.378101	0.442314	0.383647	0.876808	0.478712	0.666625	MARCHF1
ENSOCUG00000012621	1	31.8071	32.5495	29.8573	16.8002	20.767	15.4931	17.1717	15.7553	11.2009	13.3744	18.7794	11.7539
ENSOCUG00000012683	1	3.46679	2.67128	2.30978	0.4185	1.40573	0.291957	0.504919	0.562544	0.831223	1.00363	0.533532	0.305218	ADAM33
ENSOCUG00000012693	1	1.00643	0.804811	0.864261	0.18791	0.173403	0.206986	0.18353	0.178916	0.117367	0.314962	0.258985	0.228409	LDB3
ENSOCUG00000012702	1	14.3308	10.2641	9.74145	2.67403	5.64632	2.89975	3.89035	2.91348	2.51148	7.49716	4.83285	3.60667	SIGLEC1
ENSOCUG00000012739	1	3.37647	3.90886	3.46281	1.49533	1.43947	1.49739	1.12464	1.29337	2.04412	2.14925	1.42274	1.66373	PIK3CG
ENSOCUG00000012747	1	80.7515	90.2558	95.4483	29.531	27.8843	22.9458	25.9665	33.4767	32.7325	29.1367	31.6682	26.0239	PRKAR2B
ENSOCUG00000012801	1	3.38504	4.96342	4.23671	1.1088	1.84176	0.854954	1.94932	0.838374	1.37124	2.18731	0.974221	1.51625	CRISP3
ENSOCUG00000012806	1	19.517	25.5732	19.3384	5.18994	11.4331	7.60214	6.99441	3.84067	4.74858	4.86917	4.19476	5.13404	RGS14
ENSOCUG00000012839	1	11.8752	10.8469	8.9072	2.89018	3.91296	3.27653	5.74863	2.91372	2.77496	6.38927	5.56069	3.17331	ALS2CL
ENSOCUG00000012881	1	935.339	716.431	486.454	112.25	201.402	81.8831	169.458	200.904	201.928	505.625	325.652	163.667	COL1A1
ENSOCUG00000012902	1	66.6227	83.4489	81.6049	34.2187	16.2242	42.0389	27.3931	23.7373	14.9447	32.9893	36.909	42.7062
ENSOCUG00000013011	1	20.6627	17.0292	18.8798	4.78537	8.36501	3.3635	6.00919	5.39867	7.67291	6.42553	5.90049	4.84865	CDC42EP3
ENSOCUG00000013013	1	1.75676	1.89228	1.91945	0.531895	0.78533	0.699815	0.718128	0.417066	0.365438	0.90867	1.0538	0.565715	L3MBTL4
ENSOCUG00000013017	1	18.0211	18.6189	20.3679	5.97635	5.62403	7.18589	5.50122	5.91467	5.62376	5.53779	5.88344	5.61593	ELOVL2
ENSOCUG00000013047	1	193.536	185.667	136.408	62.0127	89.6963	62.7624	82.8081	72.1266	84.9017	150.333	115.787	75.603	LAMC1
ENSOCUG00000013056	1	0.763559	0.140689	0.345861	0	0.0501169	0	0.070205	0.0912535	0.114485	0.0393881	0.0467823	0	ZNF84B
ENSOCUG00000013059	1	11.7224	8.23732	10.2053	4.39061	3.6128	4.29423	6.00446	5.70857	4.29586	5.35153	5.57878	3.47234
ENSOCUG00000013062	1	9.52202	9.94909	11.1375	2.01721	1.33598	2.29641	1.88645	1.23575	1.5951	1.99357	1.59628	1.40431	ACSL6
ENSOCUG00000013072	1	14.3095	11.56	10.6705	4.53764	5.76987	5.51349	5.32899	5.76581	5.47973	5.00839	3.08739	3.5637	UBASH3B
ENSOCUG00000013078	1	6.51776	7.99695	6.16005	2.39224	5.68205	3.51346	4.06941	2.91854	3.02082	3.66104	3.31499	2.86358	FAXDC2
ENSOCUG00000013115	1	9.01888	10.8539	8.10604	1.4806	0.611772	1.48485	0.914119	0.846582	0.645957	0.794934	0.936551	1.01535	C1orf82
ENSOCUG00000013125	1	85.4399	90.9684	83.2768	22.539	43.5365	26.8315	24.7769	26.0997	21.2792	29.3215	24.3953	22.2592	ACSS1
ENSOCUG00000013134	1	23.6179	17.9515	19.2157	4.99181	4.41035	6.39095	6.59202	6.47521	6.10841	6.74946	5.32039	4.37297	ST8SIA1
ENSOCUG00000013192	1	0.230598	0.736118	0.205639	0	0.381414	0.0592818	0.0445246	0.032554	0.0242023	0.0499605	0.077883	0.0588757	SULT1C2
ENSOCUG00000013230	1	19.0217	19.0083	14.9082	2.2913	2.52965	2.93443	3.06184	2.05253	2.27342	3.12332	2.70376	2.26502	MTCL1
ENSOCUG00000013232	1	477.52	363.722	318.996	74.6954	154.273	87.2167	101.201	103.641	117.533	223.468	160.12	101.717	COL4A1
ENSOCUG00000013238	1	54.0655	48.3351	38.4346	12.8045	14.5812	12.5465	17.9849	13.8143	11.6024	20.0032	20.4462	12.6906	ELF4
ENSOCUG00000013276	1	387.133	332.191	264.796	63.2675	107.464	77.5214	87.2079	78.4035	90.2202	177.981	134.557	97.2009	COL4A2
ENSOCUG00000013280	1	45.8035	47.4926	42.1218	11.0047	24.0554	14.7701	13.8075	11.7147	10.9081	14.0817	11.4049	10.7238	ARHGEF3
ENSOCUG00000013292	1	24.1486	28.1511	25.9029	2.01455	12.1102	3.59277	2.18254	2.3211	3.01985	3.6735	3.17318	3.883	SNCG
ENSOCUG00000013333	1	6.42147	6.3723	6.70032	0.842796	2.86003	1.43745	1.64474	1.01411	1.06978	1.19881	0.99764	1.38299	HS3ST3A1
ENSOCUG00000013346	1	1.75044	0.653117	0.297329	0.145903	0.0646265	0.45	0.271592	0.294182	0.19684	0.30475	0	0.127691	MYOZ3
ENSOCUG00000013363	1	28.7728	27.4022	25.3016	8.93411	10.3588	9.99544	11.558	10.7141	9.54534	14.5817	11.8666	10.1058	STIM1
ENSOCUG00000013366	1	3.64388	2.97695	2.89574	1.03344	1.33511	1.1004	1.05091	0.807435	1.09408	1.66888	1.13945	0.83849	CRYBG1
ENSOCUG00000013420	1	150.502	131.819	118.857	39.2102	78.1113	40.6945	50.2004	46.4234	43.4121	63.0071	44.0033	30.4559	ADGRA2
ENSOCUG00000013429	1	9.38497	8.19756	7.39139	1.77828	1.59456	2.34101	3.10386	3.15701	2.5844	3.09024	3.11144	2.31549	NHSL1
ENSOCUG00000013436	1	10.2358	6.91675	6.86738	2.29859	3.23624	2.66215	3.3279	3.34355	2.91648	5.17453	4.88778	2.94567	NHS
ENSOCUG00000013451	1	3.24441	3.76613	2.74098	0.0797054	0.441311	0.0877968	0.0824267	0.321418	0.179219	0.647429	0.906286	0.348781	RLN3
ENSOCUG00000013474	1	8.99604	5.77939	5.04284	2.13951	1.00759	2.41089	4.18352	3.07425	2.23257	3.75256	3.80033	2.13207	CACNA1D
ENSOCUG00000013498	1	14.8461	15.0991	13.6231	3.03575	5.23099	4.18773	3.56483	3.91855	3.70005	4.67495	4.1351	2.77786	ADAMTS4
ENSOCUG00000013504	1	84.9397	100.645	81.0808	29.4139	30.2584	33.7479	41.1975	27.9304	30.9101	26.9577	28.3106	32.1317	C15orf39
ENSOCUG00000013514	1	93.8533	98.069	90.7044	23.4712	35.4349	21.8394	27.514	14.3297	17.3733	12.4338	13.035	14.0346	MGST1
ENSOCUG00000013515	1	4.08906	3.23134	2.52448	1.01306	1.60956	1.73045	1.82199	1.64297	1.43606	2.6748	2.33717	1.54192
ENSOCUG00000013534	1	26.2791	24.7733	24.9813	5.69234	7.46821	5.79312	7.07042	7.54763	7.47788	7.2336	7.65884	5.70267	ENPP2
ENSOCUG00000013564	1	3.27356	4.06663	3.61917	0.884634	1.60299	1.26972	0.83167	0.702661	1.35622	2.02195	1.1084	1.61294	TRIM63
ENSOCUG00000013625	1	28.0422	27.5234	31.3364	4.59588	9.76493	4.16801	5.44136	7.71127	4.72878	8.80047	7.18473	4.61914	PRSS12
ENSOCUG00000013642	1	14.1464	12.4039	13.176	5.21178	3.51675	3.82724	5.34094	6.03879	8.35164	7.45249	8.9707	6.15731	DOCK11
ENSOCUG00000013644	1	1.75251	2.26778	2.42537	0.429128	0.653396	0.413605	0.0832085	0.351506	0.150766	0.155612	0.110895	0.0880225	RPE65
ENSOCUG00000013688	1	9.72603	15.7728	12.5281	1.6023	1.38002	2.01009	1.01261	1.03203	1.60124	1.18789	0.96615	0.632979	TNFAIP6
ENSOCUG00000013760	1	5.78601	6.78944	4.73601	1.07639	1.6037	0.625165	0.829792	0.572171	0.704081	0.931099	0.76873	0.449604	NEURL1
ENSOCUG00000013769	1	54.7947	43.1864	31.7713	7.07009	16.2247	6.61007	10.0467	9.77863	7.73583	13.3213	9.33883	5.80925	SH3PXD2A
ENSOCUG00000013771	1	224.18	287.862	265.241	99.9064	108.991	103.308	105.582	88.5765	95.882	98.5153	118.718	127.264	UNC119
ENSOCUG00000013793	1	104.365	125.827	110.02	44.9182	56.3693	51.7812	51.4589	40.6026	47.7534	69.3356	63.743	62.8385	PIGS
ENSOCUG00000013795	1	35.3313	27.1578	32.5606	7.92001	8.913	7.8248	7.89419	9.93371	10.9008	9.52274	8.61605	7.41084	INSIG1
ENSOCUG00000013806	1	87.1844	73.7927	76.8647	23.9988	36.5621	22.9323	27.5995	23.2595	20.2443	34.25	29.6623	17.3769	SORT1
ENSOCUG00000013809	1	7.04889	6.3484	7.65874	2.49603	1.50763	1.62466	2.1706	1.48694	1.21177	1.38237	1.34868	1.55147	B3GNT6
ENSOCUG00000013819	1	4.5557	4.98212	3.13605	2.30554	1.48722	2.1451	3.05556	1.03805	1.81191	1.94807	1.98985	1.49373	RPS6KL1
ENSOCUG00000013919	1	8.05625	4.82489	4.95041	1.50936	2.12332	1.66972	2.11691	2.16166	1.5731	3.11202	2.33024	1.45277	FGD4
ENSOCUG00000013920	1	4.90418	3.64564	4.53854	0.315743	0.449537	0.223583	0.653046	0.500209	0.481756	0.418729	0.62944	0.246724	KRT8
ENSOCUG00000013948	1	25.6989	19.0103	16.5691	6.42313	7.29298	5.40727	7.41695	7.09097	5.74773	8.35081	7.75022	4.71119	ARHGAP2
ENSOCUG00000013967	1	26.6575	22.9115	19.3357	8.19255	9.18588	7.08354	7.84975	7.26757	7.59295	8.9444	7.90693	6.6656	MVK
ENSOCUG00000013994	1	0.690721	0.87696	0.333645	0.0604517	0.0446277	0.0443924	0.125031	0.0203147	0.0226545	0.0233827	0.0208292	0.0440883	PLA2G4D
ENSOCUG00000014063	1	13.3683	16.6531	14.026	3.75553	2.17532	3.48762	4.6844	4.05406	3.23485	4.02269	5.72148	5.37258
ENSOCUG00000014068	1	1.65256	1.02309	0.611308	0.548528	0.189817	0.415396	0.567255	0.276498	0.308344	0.358037	0.567	0.150018	RIMS3
ENSOCUG00000014077	1	11.0865	8.5071	9.34991	1.24222	2.1636	2.20033	1.86562	1.94459	1.79661	2.12961	1.66476	1.01751	LTBP2
ENSOCUG00000014092	1	2.85432	2.05654	1.59939	0.551303	0.440908	0.573533	1.10858	0.555793	0.413206	0.995137	0.823145	0.60311	BEST1
ENSOCUG00000014097	1	0.188757	0.116859	0.104737	0.0352426	0.0390261	0.0129401	0.0485944	0.059216	0	0.0408954	0.0121431	0	MROH2B
ENSOCUG00000014102	1	61.8974	66.1126	56.572	6.88952	13.2163	8.32101	10.1353	7.82327	8.42968	9.90633	8.09882	6.49242	JCAD
ENSOCUG00000014119	1	35.3917	27.0964	19.7895	8.99856	9.91479	11.4815	12.904	12.0202	9.10507	18.1515	14.2005	16.2265	HOXD3
ENSOCUG00000014125	1	48.8825	46.6654	38.3317	6.41835	16.6919	3.77189	5.05374	5.15221	6.24863	8.1467	3.53959	1.60007	PGM5
ENSOCUG00000014198	1	71.6959	73.5808	85.8925	32.5104	57.3912	34.8935	35.0388	57.2867	32.2178	37.4029	43.2599	31.3319	CAT
ENSOCUG00000014231	1	4.4749	4.95755	4.61131	0.806188	1.42838	1.13022	1.7129	0.768422	0.80749	1.99006	1.81819	1.47526	TPBGL
ENSOCUG00000014237	1	15.1746	11.0392	13.4096	3.56905	3.343	4.11317	5.0421	5.80968	3.76515	6.44768	6.26958	3.96462	GK5
ENSOCUG00000014266	1	0.886682	0.926339	0.632569	0.165551	0	0	0.0856018	0	0.0930616	0	0	0
ENSOCUG00000014275	1	72.8339	135.659	134.054	3.74179	4.02511	7.5956	3.42731	2.20947	2.76444	3.65966	4.25458	4.50275
ENSOCUG00000014305	1	2.89577	4.14814	3.58964	0.23007	0.0636924	0	0.0594813	0.057986	0	0.0667433	0	0
ENSOCUG00000014317	1	43.9857	45.7313	14.3486	0.0599235	0.282016	0.0495051	0.0929541	0.0755144	0.0505273	0.243373	0.139368	0.196664	PIGR
ENSOCUG00000014337	1	0.374115	0.394795	0.242634	0.0317503	0	0	0.0985028	0.0640177	0.0356956	0.184215	0	0
ENSOCUG00000014352	1	25.0285	37.2643	38.7064	10.6971	10.7449	12.3768	10.139	9.1199	8.95822	10.4386	11.7887	9.12229	GATM
ENSOCUG00000014406	1	20.5688	18.4579	20.0344	5.69042	8.3791	6.99245	10.0375	8.20296	9.52235	13.2063	10.6584	8.04762
ENSOCUG00000014409	1	13.1842	13.3177	12.084	5.61402	5.17895	4.91569	5.24266	6.13663	4.33485	4.43276	5.14804	3.53458	CCDC15
ENSOCUG00000014417	1	23.6855	25.8758	19.8341	7.76303	11.0501	11.8965	14.1172	8.76353	6.89853	11.6873	12.301	6.72961
ENSOCUG00000014421	1	4.13277	5.88764	6.17965	0.701477	0.517856	0.708298	0.272035	0.0589325	0.197161	0.339163	0.302125	0.383698	MPZ
ENSOCUG00000014444	1	4.85573	4.06023	4.06106	1.47626	3.1844	1.64426	1.54936	1.70958	1.45609	2.27344	1.79826	1.58496	HDAC9
ENSOCUG00000014450	1	10.82	7.26542	8.89675	1.30535	1.0497	1.3266	2.16148	8.23272	1.64227	1.68603	3.21265	0.595007	ADD2
ENSOCUG00000014454	1	22.4432	18.6376	22.1561	8.94456	6.98502	10.21	10.6133	9.68536	7.54772	9.22599	9.83282	7.32957	PARP8
ENSOCUG00000014460	1	3.89531	4.07274	2.89064	1.0832	1.28516	1.39202	1.49357	1.30002	1.27579	1.85548	1.86613	1.94676	PODXL2
ENSOCUG00000014475	1	3.32152	3.50657	4.2744	0.535938	2.02064	0.590345	1.0029	1.01628	0.530805	1.49552	0.8046	0.572341	KCNA4
ENSOCUG00000014480	1	20.5803	20.4136	19.6502	9.37554	12.0321	6.44912	9.1229	7.52429	9.25078	10.5427	9.35051	5.78464	C1R
ENSOCUG00000014482	1	33.6333	21.9314	26.1517	4.49284	6.2554	5.08871	7.1346	7.32006	4.4805	7.79296	4.76074	2.75571	PLXDC2
ENSOCUG00000014502	1	0.227548	0.333649	0.313278	0	0.0123806	0.0246306	0	0	0	0.0259472	0	0.0122309	MC2R
ENSOCUG00000014513	1	6.24163	7.32908	4.16114	1.27988	1.95809	1.79937	1.86346	0.831909	1.13599	1.56334	2.07152	1.28962	IL27RA
ENSOCUG00000014516	1	21.7014	20.7475	23.9	0.519801	0.489264	0.74434	0.658496	0.799152	0.75971	0.527779	0.631335	0.412269	CCDC68
ENSOCUG00000014520	1	117.11	99.987	103.413	38.6417	57.7123	37.5725	35.5854	45.7693	63.1699	52.3325	34.7818	40.0134	CAV1
ENSOCUG00000014540	1	23.3109	19.0774	20.5462	8.11892	12.3683	8.77596	12.8688	9.02649	7.89938	11.8513	11.0277	7.18849	RHBDF2
ENSOCUG00000014585	1	27.839	24.186	27.4802	1.08968	9.29134	1.74044	1.35227	1.97741	0.980072	1.01157	0.450553	0.596041	ZDHHC2
ENSOCUG00000014622	1	101.99	128.685	150.866	13.7048	25.5944	28.6376	17.5131	22.6058	17.77	32.279	28.5595	15.1642
ENSOCUG00000014668	1	1.81225	1.6327	1.35077	0.694402	1.2443	0.681452	0.757279	0.852797	0.865855	0.835083	0.665584	0.5801	PPARGC1A
ENSOCUG00000014676	1	290.753	266.772	217.886	104.151	97.7848	111.14	142.268	116.483	113.721	235.795	209.722	136.499	LAMB1
ENSOCUG00000014683	1	0.25301	0.261062	0.300833	0.039366	0.0726535	0.0289082	0.12213	0.092602	0.103268	0.167494	0.0813834	0.0574203	VWA5B2
ENSOCUG00000014697	1	39.0738	59.0945	58.4874	20.4049	23.5636	27.397	24.6185	20.1353	18.7714	27.613	29.0662	27.5772	BTG3
ENSOCUG00000014767	1	19.3913	11.8322	13.0814	2.96008	2.36968	3.0811	4.76303	4.96635	5.02545	7.07773	4.82826	4.1295	PAG1
ENSOCUG00000014794	1	9.2091	11.6025	7.38444	1.58313	3.23914	1.81313	1.43117	0.61304	1.11977	1.80056	0.975362	1.21577	ATP2A3
ENSOCUG00000014800	1	109.29	102.008	128.94	44.6478	32.5354	48.3871	38.4272	33.6279	32.9026	33.6593	38.4248	31.181	PLP1
ENSOCUG00000014818	1	6.78107	8.44362	8.16386	3.30008	4.28684	4.08948	4.49564	3.4869	3.60313	4.08715	3.44401	2.98535	KCNN2
ENSOCUG00000014826	1	44.386	64.3828	51.3614	21.8634	47.6909	20.9101	19.2363	22.7761	21.4589	19.3699	20.5549	27.7523	CLTB
ENSOCUG00000014829	1	12.8418	10.3189	11.5706	0.213127	1.25379	0.176073	0.316831	0.443155	0.419319	0.649195	0.275381	0.160294	SYT1
ENSOCUG00000014832	1	23.3923	17.4806	19.5828	7.28945	5.15524	8.1644	7.47498	9.51024	6.30139	6.14852	8.26311	5.26046	STEAP2
ENSOCUG00000014833	1	7.54495	6.15548	6.70499	1.25591	2.50332	0.899212	1.56937	1.60377	1.52963	2.13745	1.72012	0.904501	PLA2R1
ENSOCUG00000014857	1	0.259543	3.14461	0.173589	0.0681456	0.0251538	0.0250212	0.101793	0.038167	0.170252	0.0966484	0.219148	0.0165665	COL5A3
ENSOCUG00000014861	1	15.9866	16.655	15.0744	6.09093	11.8274	6.99544	9.01547	6.40246	5.38737	8.2068	6.68396	5.14748	MAPRE3
ENSOCUG00000014904	1	65.7958	48.8792	48.2194	11.6276	34.2332	12.7022	16.5696	15.3035	15.9507	32.9269	23.5862	16.5479	EPAS1
ENSOCUG00000014914	1	29.2731	25.7839	22.3318	4.81705	7.83135	4.43886	6.77541	5.12533	6.88579	9.66196	7.93097	5.29891	AEBP1
ENSOCUG00000014920	1	19.8349	18.6876	18.0686	5.08802	9.10593	6.38875	5.24823	5.57063	6.68956	7.35174	5.90751	5.07313	SPRY1
ENSOCUG00000014979	1	26.342	25.2416	28.2253	6.20958	6.2664	5.22933	8.03189	7.23651	4.93167	4.67151	5.47651	3.21997	MBNL3
ENSOCUG00000014988	1	1632.48	1304.65	992.513	356.826	565.433	230.577	369.628	471.032	504.893	1076.52	679.176	457.84	COL3A1
ENSOCUG00000015020	1	279.019	205.221	196.281	57.4981	96.384	38.8895	56.4319	70.0443	70.0963	110.317	76.953	45.4958	COL5A2
ENSOCUG00000015032	1	13.9481	11.9838	11.7305	2.43078	6.01921	3.13501	2.96852	2.70918	2.60924	2.94824	2.56315	2.00442	RAPGEF4
ENSOCUG00000015037	1	4.38576	3.89122	5.04868	0.964899	0.981853	0.689418	1.15966	1.07792	0.850248	1.02888	1.13218	0.82734	UGT8
ENSOCUG00000015049	1	29.9835	25.929	19.5199	10.3722	8.86282	9.65005	10.2901	10.4458	9.38724	15.0104	12.5327	9.48929	DTX4
ENSOCUG00000015054	1	17.4697	9.0046	9.58434	2.38665	3.54796	1.9807	3.74728	3.07078	2.92214	3.30059	1.90378	1.49622	UNC5C
ENSOCUG00000015071	1	56.7018	55.5806	42.7404	6.22748	10.261	8.80188	14.626	6.25929	11.5564	11.0137	10.5283	9.99331	ALDH1L1
ENSOCUG00000015115	1	19.3817	15.9907	16.6535	2.68564	11.0952	3.49873	4.28172	4.04391	3.03872	4.73455	3.31885	2.05284	RAPGEF5
ENSOCUG00000015136	1	130.368	88.7739	70.1327	1.18843	1.68157	1.8424	1.91179	1.66404	2.25159	3.14117	2.11567	0.938967	NIBAN1
ENSOCUG00000015162	1	573.296	687.819	681.386	196.683	333.411	244.045	245.19	196.035	209.636	262.395	243.134	199.576	MFAP4
ENSOCUG00000015193	1	10.5654	12.9788	9.79212	4.35025	7.58947	5.86175	6.57839	5.40624	5.39835	6.17509	4.85027	4.75904	SLC45A4
ENSOCUG00000015208	1	16.4633	17.7583	16.2424	7.94472	9.18165	8.16088	7.44979	7.2943	8.06356	6.49356	6.33844	7.41519	MB21D2
ENSOCUG00000015211	1	13.0757	12.7454	12.5055	1.27683	1.45318	2.25944	2.1029	2.66981	1.99374	3.45714	1.63146	1.93355	ATP8A2
ENSOCUG00000015222	1	0.999552	0.372949	0.339568	0.0833149	0.110711	0.348736	0.327406	0.470363	0.149868	0.44472	0.447827	0.492178	SLC9C2
ENSOCUG00000015234	1	177.564	129.915	129.144	23.963	48.7601	9.72905	23.2916	32.3776	32.532	54.6277	34.9533	18.1281	COL14A1
ENSOCUG00000015245	1	0.465181	0.317638	0.292823	0	0	0	0	0	0	0	0.0264054	0	IQCA1L
ENSOCUG00000015320	1	29.3232	15.37	10.6418	1.86895	6.66396	1.39	1.99207	6.0862	6.58299	4.07675	2.12952	1.73606	COL12A1
ENSOCUG00000015331	1	0.85889	1.30378	0.981959	0.215873	0.204898	0.203818	0.382702	0.683982	0.312039	0.894636	0.51004	0.404843	GPRC5D
ENSOCUG00000015335	1	29.408	33.2085	27.302	11.838	14.933	14.0317	15.7173	11.0045	12.914	14.4759	13.5535	13.5271	SLC35C1
ENSOCUG00000015352	1	46.0015	64.2614	45.026	27.1873	24.139	24.4614	22.3742	17.5317	16.6138	20.2741	14.6844	32.5109	ENHO
ENSOCUG00000015360	1	5.87835	3.69989	3.46274	1.43473	2.43568	1.92474	2.13609	2.12178	1.88917	3.70544	2.41789	1.80163	ATXN1
ENSOCUG00000015363	1	3.72481	2.92074	2.10043	0.254964	0.354421	0.346577	0.224399	0.218758	0.182966	0.560244	0.30841	0.243316	NFASC
ENSOCUG00000015430	1	4.28805	5.11033	4.62271	0.240185	0.206866	0.235172	0.193189	0.107618	0.240028	0.123871	0.248274	0.379536	TRIM72
ENSOCUG00000015434	1	7.10038	5.92873	4.24377	1.20969	2.85928	0.919497	1.3022	1.43349	1.42363	1.80595	1.21386	0.96737	MAP3K5
ENSOCUG00000015502	1	0.250978	0.437005	0.660782	0.150621	0.148258	0.184346	0.138456	0.151848	0.112891	0.23304	0.22489	0.146466	GPR83
ENSOCUG00000015536	1	10.5113	5.54082	6.79248	2.97465	2.72968	3.15914	3.83607	3.91885	2.94457	2.11782	2.10705	1.84101
ENSOCUG00000015548	1	15.0255	11.6946	7.54221	3.09861	4.77844	4.46118	5.60233	5.21515	4.13245	7.36017	5.30424	3.19073	PEAK1
ENSOCUG00000015569	1	44.2689	41.9088	34.0292	16.5197	21.0219	18.0138	22.2089	18.2918	16.736	26.2804	24.746	18.0115	ANKS1A
ENSOCUG00000015600	1	10.0292	7.92553	7.84389	0.904401	5.60836	1.0057	1.05108	1.20701	0.668172	1.19939	0.890342	0.348642	CDH7
ENSOCUG00000015605	1	39.7308	28.6391	31.7344	14.9565	12.3806	14.0925	20.3734	19.5183	15.7856	23.4477	25.0248	14.8451	PITPNC1
ENSOCUG00000015613	1	37.9521	46.1893	39.3179	14.8842	30.2408	18.1165	15.3924	15.7286	14.3144	17.1527	15.4384	16.1988	TPST1
ENSOCUG00000015622	1	23.2795	22.3572	23.7767	3.0019	8.76056	3.20331	3.68646	12.925	3.05852	4.64452	4.62216	4.51548
ENSOCUG00000015634	1	7.42114	8.31915	3.68082	0.197942	3.28788	0.47968	0.04094	0.359197	0.0890154	0.27563	0.286451	0.346468
ENSOCUG00000015665	1	37.2733	37.3025	35.1642	3.19275	16.072	4.80808	4.60969	6.73294	4.36981	5.65572	4.19309	3.71212	NTN4
ENSOCUG00000015669	1	7.61462	5.32334	7.18389	1.99157	1.39244	1.91352	2.42788	2.16167	1.96938	2.95202	2.47187	1.74933	ARAP2
ENSOCUG00000015705	1	13.4326	8.53663	7.77777	1.72292	3.12147	2.35052	3.26926	2.78869	2.5116	4.23088	3.26779	2.61109	MAST4
ENSOCUG00000015732	1	49.2226	41.0805	42.3363	13.2711	24.8314	9.85966	10.9761	14.1468	12.1423	13.5965	9.26849	4.06305	GASK1B
ENSOCUG00000015737	1	17.3072	18.0402	14.9897	2.89152	8.93173	3.63209	4.48536	4.16804	5.13289	7.26985	3.95898	4.71711	SMPD1
ENSOCUG00000015752	1	29.9351	38.9445	36.0928	14.967	18.1551	14.9133	16.4046	12.7458	13.112	14.7682	18.4813	15.577	ACSS3
ENSOCUG00000015757	1	20.301	23.3843	20.3319	5.97715	8.95963	9.31385	11.6086	5.58491	8.03107	10.2346	8.28815	9.01082
ENSOCUG00000015771	1	52.4248	45.4493	48.2284	13.7441	15.8592	14.0203	15.1609	14.6994	18.5647	19.3926	22.6076	17.6069	SQLE
ENSOCUG00000015782	1	3.37224	5.05099	3.62163	1.47252	2.02419	2.18131	2.25793	1.63808	1.59841	1.29626	1.10221	2.27746	ACTL7B
ENSOCUG00000015810	1	3.93475	5.01607	4.92912	2.36138	2.07012	1.69794	2.17067	1.7524	1.58551	2.43568	2.44091	2.58328	TULP1
ENSOCUG00000015835	1	28.1429	26.0666	25.1587	11.6235	22.392	13.1179	15.2438	11.9253	10.9754	12.7459	11.2359	8.18154	MYO1E
ENSOCUG00000015838	1	17.8353	23.9327	16.1315	4.87406	9.10059	6.81885	5.73952	4.12469	3.9198	4.95403	4.04528	2.80226	COL9A2
ENSOCUG00000015852	1	3.31338	2.30017	1.66084	0.697484	0.705201	0.701483	0.752658	0.473872	0.511405	1.24923	0.89338	0.613739	KCNQ4
ENSOCUG00000015857	1	0.523737	0.379973	0.415156	0.0814887	0.112796	0.0673209	0.168542	0.225919	0.114518	0.0709195	0.147408	0.0891463	KCNH6
ENSOCUG00000015860	1	19.3917	20.1184	18.9515	0.650036	0.936753	0.735642	0.893236	0.781009	0.91101	1.63259	1.60158	0.954654
ENSOCUG00000015865	1	8.45863	6.10254	4.80034	1.25841	0.982421	1.21982	2.14076	2.22015	1.61285	4.11791	2.49101	1.61758	PCDH19
ENSOCUG00000015893	1	0.703268	0.479166	0.345386	0.114179	0.047414	0.141492	0.118078	0.0143887	0.0802297	0.0828085	0.162284	0.124909	PCSK2
ENSOCUG00000015922	1	5.84357	5.45805	3.267	1.4451	2.46036	1.77087	2.09221	1.93035	1.92929	1.8865	2.24064	2.48991	RNASEL
ENSOCUG00000015927	1	7.98792	17.4095	12.4053	5.63086	4.88717	6.53775	3.61977	3.22192	3.59302	3.8851	2.35966	5.82702	CITED4
ENSOCUG00000015949	1	2.67353	2.72804	1.46126	0.543454	0.289754	0.509939	1.06157	1.13634	1.3238	1.13279	1.86212	0.737649	CRB1
ENSOCUG00000015953	1	37.7895	33.8152	39	18.6103	14.4327	14.4717	16.4377	26.911	20.1715	17.2812	20.8564	17.8228	STK17A
ENSOCUG00000015956	1	2.93407	3.2594	2.43832	0.736313	1.30458	0.778619	1.34016	0.831387	0.927146	0.956946	1.03511	0.612184	IRAG2
ENSOCUG00000015958	1	93.1734	95.7666	85.0817	31.6182	42.1145	38.2443	39.8816	32.1303	34.8371	43.6921	40.5165	29.9836	GALNT2
ENSOCUG00000015973	1	1.88058	1.30979	1.34162	0	0	0	0	0	0	0	0.181473	0.288087	DEFB11
ENSOCUG00000015981	1	6.4715	3.94793	4.39761	1.84466	2.49072	1.71089	2.38987	3.21124	2.07774	3.12328	2.31082	1.32033	DGKH
ENSOCUG00000015995	1	9.55188	8.16285	5.19094	0.218825	0.666371	0.180779	0.424304	0.799699	0.246016	0.380885	0.226194	0.149617	SLC17A8
ENSOCUG00000016007	1	99.8945	79.6334	87.1192	23.1687	46.4418	22.7384	26.6219	31.5012	33.9228	55.006	43.2266	32.8588
ENSOCUG00000016014	1	1.18704	1.19819	0.675024	0	0.266766	0	0.249128	0	0.270838	0.167726	0	0	NPFFR1
ENSOCUG00000016017	1	2.65977	3.58461	3.83254	1.57819	1.23498	1.87747	1.80615	2.01532	1.63235	2.0755	2.28387	1.54233	SLC35F3
ENSOCUG00000016068	1	8.76226	9.76916	7.22026	2.13059	4.02349	2.40975	3.10828	2.22466	2.86586	2.9359	2.26134	3.14243	SERPINE1
ENSOCUG00000016069	1	59.3303	60.4055	62.4385	24.3676	29.2798	30.5513	32.6243	27.7803	24.9431	31.6837	28.7193	22.0681	RNF144A
ENSOCUG00000016083	1	49.9707	36.8404	43.2538	5.3945	27.227	5.64452	7.21664	5.66387	4.60886	10.9303	6.78964	4.70891	TGFBR3
ENSOCUG00000016096	1	1.7248	5.09641	2.61014	0	0	0	0	0	0.0822847	0.0849294	0	0
ENSOCUG00000016101	1	5.94037	16.0088	8.21448	3.85993	5.54579	4.8438	2.82957	2.19197	1.86766	3.79869	3.40911	4.32955	MMP9
ENSOCUG00000016103	1	3.63277	1.8659	1.9877	0.510204	1.16319	0.595056	0.527623	0.121026	0.269931	0.278607	0.279204	0.262658	HTR7
ENSOCUG00000016107	1	26.8765	23.4844	20.6243	8.1628	10.3385	8.13727	11.7759	9.37109	7.72026	13.0004	9.52405	6.74205	EFNA5
ENSOCUG00000016143	1	3.24201	2.5921	1.63239	0.308833	0.478782	0.323175	0.495034	0.155674	0.746499	0.394205	0.430965	0.371639	GALNT6
ENSOCUG00000016167	1	41.455	38.1391	38.3071	18.9903	17.5428	18.3668	25.1151	18.8275	19.3781	27.0332	25.4525	18.6592	OCRL
ENSOCUG00000016171	1	1.51289	1.30255	0.823092	0.0885976	0.201989	0.177961	0.253309	0.136606	0.105466	0.157236	0.145453	0.114027	CDH23
ENSOCUG00000016173	1	2.06686	5.36668	1.09942	0.126941	0.253024	0.335586	0.21004	0.10238	0.542317	0.176762	0.0524864	0.0555479	WNT2
ENSOCUG00000016181	1	1.77021	2.41687	1.64677	0.693566	2.28511	0.282954	0.469309	0.405717	0.308049	0.576286	0.708073	0.252914
ENSOCUG00000016197	1	18.1563	17.725	16.8009	4.78706	7.1465	6.40575	5.79391	5.32652	3.70754	7.7357	7.51404	4.22831	RHBDL2
ENSOCUG00000016198	1	0.408075	0.310353	0.326261	0.0985232	0.101827	0.08682	0.149434	0.125812	0.0812283	0.274383	0.23084	0.143709
ENSOCUG00000016209	1	148.953	139.149	127.769	54.3479	71.6871	60.5552	63.708	59.9485	54.9383	70.4258	71.3425	62.3678	CALCOCO2
ENSOCUG00000016211	1	15.6894	19.0914	21.9178	5.57259	7.81946	7.27435	7.36268	5.01425	5.04009	3.89915	4.16114	3.49397	SNTB1
ENSOCUG00000016227	1	14.1773	8.25889	8.67096	1.39086	2.64262	1.42454	1.9178	2.56822	2.52386	4.2076	2.43653	1.74579	SVEP1
ENSOCUG00000016236	1	78.5872	63.245	65.2745	15.676	14.5765	16.92	20.6506	18.9213	23.4566	57.7346	42.3972	30.6813	COL15A1
ENSOCUG00000016256	1	18.8048	18.7353	18.8918	4.27143	3.40455	3.90364	5.53371	5.79683	5.1716	6.10038	5.33715	6.29033	HAND2
ENSOCUG00000016277	1	0.230508	0.173137	0.161223	0.0379746	0.0560685	0.0557729	0.170175	0.127613	0.0426934	0.161574	0.130845	0.0692385	EREG
ENSOCUG00000016289	1	11.347	11.6455	10.6864	4.94338	4.37554	4.64881	5.09477	6.00071	5.10397	6.67282	5.77032	7.02661	HPGD
ENSOCUG00000016311	1	6.17079	8.42716	6.15748	0.948823	1.45094	1.54283	1.68209	1.5487	0.838141	1.28451	1.54122	1.01327	GLS2
ENSOCUG00000016314	1	19.279	25.666	20.4476	4.39256	9.90044	4.23902	4.10034	4.03645	3.80212	4.60094	2.89306	2.84918	TMEM119
ENSOCUG00000016389	1	0.48949	0.284101	0.327382	0	0	0	0	0	0	0	0	0.0312438	SLC17A6
ENSOCUG00000016390	1	33.4625	28.2253	24.5695	3.03266	9.54445	2.75028	2.84145	5.35613	6.75492	7.65998	4.60791	2.931	CCN4
ENSOCUG00000016445	1	7.46057	6.57466	4.76091	1.83704	4.28078	2.39304	3.07265	2.02915	2.34368	4.24486	4.06201	1.89608
ENSOCUG00000016496	1	11.2105	12.068	8.94016	0.0506806	0.364789	0.111651	0.104822	0.30656	0.199424	0.264643	0.28813	0.138608	MLPH
ENSOCUG00000016506	1	27.1552	22.2581	22.081	1.82226	1.98444	2.76135	2.48834	1.34991	1.61858	1.98604	2.05014	1.31064	PLXNB3
ENSOCUG00000016515	1	2.43693	2.03475	2.0842	1.15745	0.79554	0.791346	1.03186	0.603554	0.717943	1.11153	1.11391	0.567612	GJA9
ENSOCUG00000016518	1	16.4811	11.1174	7.36843	2.63922	5.31565	2.72808	4.54887	3.70186	3.5692	5.09314	4.47764	1.72606	KIAA1217
ENSOCUG00000016522	1	8.93018	8.14924	9.39659	1.40175	3.58103	1.66595	1.01727	2.00818	1.89388	2.43988	1.85568	1.39896	PDE1A
ENSOCUG00000016603	1	70.193	105.419	71.89	36.1423	40.6034	45.5193	39.2416	23.8723	25.1838	70.0639	67.1249	50.7328	ANGPTL4
ENSOCUG00000016605	1	595.778	786.638	647.643	126.567	123.021	116.522	115.019	99.9778	109.225	108.322	134.762	157.594	AKR1B1
ENSOCUG00000016623	1	4.38165	7.79891	1.04197	0.545395	1.20789	0.400508	0.564016	0.733116	1.53292	0.738354	0.469802	0.89497
ENSOCUG00000016629	1	4.49657	3.57455	4.05669	1.91104	1.37463	1.60127	1.68913	1.1856	1.17525	2.46396	1.5533	1.5367	SSC4D
ENSOCUG00000016641	1	1.46106	0.963637	1.06602	0.278992	0.583559	0.307314	0.352632	0.29689	0.400788	0.323741	0.240323	0.237385
ENSOCUG00000016645	1	16.1566	12.493	12.0319	1.84401	1.45856	2.13243	2.45815	1.63669	1.53592	2.7867	2.53937	1.60848	LRP8
ENSOCUG00000016651	1	230.844	219.459	194.839	86.0684	90.5358	107.316	123.169	86.5228	92.324	163.942	155.779	113.678	AXL
ENSOCUG00000016659	1	2.57241	2.2119	2.71879	0.213463	0.137888	0.0587832	0.0735835	0.233135	0.079996	0.123851	0.0551629	0.0583805	EMB
ENSOCUG00000016676	1	17.5535	14.469	14.7353	4.4712	5.44632	6.55038	7.86055	6.1867	4.0717	10.2859	9.57862	6.88459	MAMLD1
ENSOCUG00000016683	1	22.0388	29.5185	21.1652	2.90148	7.78903	7.84481	7.0922	3.54559	3.26203	1.83648	2.09035	6.15591
ENSOCUG00000016688	1	10.8812	11.3573	10.2924	4.01203	4.78935	4.79544	5.31132	4.80489	4.70252	5.4645	5.51482	4.18672	MTM1
ENSOCUG00000016703	1	22.3409	19.6486	16.0387	6.77333	9.24681	8.04287	11.147	9.25305	7.74797	10.9799	9.30808	6.90089	TRERF1
ENSOCUG00000016712	1	5.63819	5.17066	5.70191	1.18007	1.3275	1.01101	1.41407	1.43517	1.43201	2.58656	2.32346	1.59834	DNER
ENSOCUG00000016744	1	16.8347	18.8922	15.3591	4.00516	5.06184	5.32288	6.66307	5.92501	6.95005	12.0736	8.32509	6.1913	SPOCK2
ENSOCUG00000016757	1	2.40523	1.53952	1.75512	0.279799	0.402788	0.493126	0.30382	0.28913	0.228061	0.243509	0.202455	0.076523	EXPH5
ENSOCUG00000016764	1	0.958346	0.643137	0.747791	0.0978532	0.185757	0.138583	0.144563	0.1973	0.28289	0.405531	0.390145	0.259975	MYT1L
ENSOCUG00000016823	1	8.7865	8.19841	6.74625	2.44606	2.53555	1.93469	2.75781	1.6409	1.59211	2.08079	2.14822	1.46874	COBL
ENSOCUG00000016908	1	20.199	24.8638	19.7602	5.8108	10.7454	9.07811	8.13008	5.30294	5.87104	9.10063	8.81345	5.23505	PDE8A
ENSOCUG00000016936	1	23.3737	25.6784	20.8287	5.83036	12.0377	5.76087	6.96079	5.9097	8.42005	11.4042	9.30954	6.67209	MMRN2
ENSOCUG00000016944	1	1.28573	1.04329	1.08349	0.43117	0.516171	0.603303	0.783321	0.293704	0.602659	0.635552	0.409553	0.356952	BVES
ENSOCUG00000016945	1	34.2435	29.8021	29.4904	12.5624	10.1872	12.2211	10.112	9.78175	10.6067	14.4801	12.6821	9.38517	ITIH5
ENSOCUG00000016955	1	28.2305	28.2121	24.982	10.1471	12.9142	10.3387	10.4324	8.44906	7.71891	12.2121	8.99154	7.89094	TMEM164
ENSOCUG00000017019	1	169.435	142.46	150.559	36.0453	81.8342	30.2597	31.5214	38.4973	46.7454	42.943	26.3434	23.9876	CDH11
ENSOCUG00000017082	1	18.0409	17.7828	19.2325	4.50516	3.36455	3.27468	3.22336	3.14233	3.43064	4.48312	3.66865	3.13763	IGSF11
ENSOCUG00000017084	1	1.20994	1.15511	0.658817	0.126677	0.151966	0.11628	0.196502	0.297986	0.0712088	0.110246	0.0545594	0.0115484	HCN1
ENSOCUG00000017109	1	10.6437	10.5253	11.0268	4.11056	4.46193	3.4434	5.08009	4.4817	4.40454	5.05254	5.5709	4.36359	TTC39C
ENSOCUG00000017113	1	35.6729	38.1044	40.9223	4.48721	6.85609	5.80384	8.18135	12.4049	11.4079	19.9569	19.2159	10.8782	ASB4
ENSOCUG00000017120	1	20.6195	25.0722	17.2028	1.26724	5.50657	1.57258	3.0855	2.11849	3.06584	6.01231	4.62617	2.15846	PDK4
ENSOCUG00000017147	1	5.55802	6.67619	7.56636	2.3913	2.14839	1.93826	1.99079	1.77396	2.35027	2.56543	2.3941	1.53012	CDS1
ENSOCUG00000017169	1	1.00017	0.746361	0.693714	0.244542	0.283104	0.318343	0.356346	0.336182	0.237439	0.567532	0.264267	0.376963
ENSOCUG00000017210	1	253.546	257.691	179.255	0.393495	0.269743	0.412801	0.658838	0.283357	0.294928	0.478354	0.34864	0.266483	NPTX2
ENSOCUG00000017227	1	7.61915	9.55546	8.33093	0.679113	0.27706	0.354342	0.59141	0.684644	0.361658	0.539186	0.591144	0.625625
ENSOCUG00000017233	1	10.0675	12.3153	19.3602	2.36015	4.49588	2.92471	5.46258	2.80426	2.33754	5.49372	9.80208	3.36573	H1-3
ENSOCUG00000017236	1	3.7569	4.5707	4.16636	0.708192	1.51242	1.09583	1.42987	1.49592	0.796193	1.5066	1.44665	1.199	LRRC2
ENSOCUG00000017242	1	61.4324	66.5278	58.6665	19.4862	22.6198	14.3219	22.6357	24.9795	32.0871	35.0287	31.325	30.2302	PDGFC
ENSOCUG00000017243	1	4.27302	3.67945	2.70693	1.04631	1.21295	1.11651	1.38635	1.02187	1.52555	1.30899	1.18294	0.590201	FAR2
ENSOCUG00000017272	1	19.9709	15.9225	16.9613	3.75666	6.02743	4.59923	5.58081	5.47569	4.55037	6.72103	6.15537	3.70253	COBLL1
ENSOCUG00000017302	1	32.1058	22.4338	17.72	3.04505	15.9064	2.56392	4.77572	5.44858	4.77966	10.8409	6.10293	4.26718	SLIT3
ENSOCUG00000017315	1	2.89174	1.67838	1.0315	0	0	0	0.139587	0.136078	0	0.156629	0.139524	0	RNASE11
ENSOCUG00000017322	1	65.327	61.8574	61.4353	4.42132	6.20157	6.46213	7.87611	3.49876	4.75693	7.99915	4.47193	4.68077	ERBB3
ENSOCUG00000017339	1	15.5359	10.8219	8.66562	2.82236	5.49611	3.60535	5.2659	4.53849	4.47005	8.61727	5.81263	3.31651	KIAA1671
ENSOCUG00000017362	1	45.7578	35.2296	39.484	17.5463	10.9977	12.9896	19.1077	25.4331	25.5016	24.9882	21.4546	18.5408	NETO2
ENSOCUG00000017373	1	11.8011	9.38602	6.2759	1.23186	2.5057	1.1452	1.77084	1.42686	1.38494	1.05435	1.23722	0.726378	PLEKHA7
ENSOCUG00000017382	1	29.5279	23.177	20.3142	8.93483	9.75994	8.99392	11.5029	9.12096	8.05163	12.1143	11.0865	7.78738	MAGI3
ENSOCUG00000017412	1	9.49357	9.8334	7.12015	2.6588	2.41579	2.66588	4.40637	1.40896	2.37602	4.35102	2.64264	4.13924	RHCG
ENSOCUG00000017423	1	24.311	28.4528	19.7413	6.30132	8.44137	6.9116	8.25602	6.08346	6.6941	9.75971	8.8733	6.25085	PCSK6
ENSOCUG00000017426	1	0.322385	0.187113	0.143746	0	0	0	0	0	0	0.0436542	0.038887	0.0411552
ENSOCUG00000017440	1	2.49888	2.95597	2.82973	1.022	1.79598	1.02785	1.37855	1.76946	0.999122	1.72732	2.15876	1.57983	ERFE
ENSOCUG00000017473	1	3.30406	2.87653	1.96429	0.25704	0.284635	0	0.265816	0.518267	0.288981	0.298269	1.32848	0
ENSOCUG00000017497	1	0.649412	0.472557	0.495567	0	0.01002	0	0.018715	0.0364891	0	0.0419998	0.00935331	0	FREM3
ENSOCUG00000017499	1	1.57268	1.65961	1.15596	0.533878	0.532073	0.47046	0.427881	0.659326	0.615224	0.696949	0.593246	0.481838	PLPPR5
ENSOCUG00000017501	1	0.812583	1.029	0.439171	0	0	0	0	0	0	0	0	0	GPR26
ENSOCUG00000017565	1	11.9954	12.5626	10.8545	1.9959	4.89953	2.76274	3.83583	2.44842	2.02548	4.16066	3.45982	2.54092	KCP
ENSOCUG00000017569	1	1.14944	0.869113	0.890237	0.28549	0.555969	0.151814	0.17307	0.0694727	0.0996101	0.1942	0.0203521	0.140005	SLC5A1
ENSOCUG00000017587	1	6.25459	6.98112	5.88408	2.55052	1.56316	2.01432	2.90302	2.95942	2.97566	2.25229	2.08924	1.68465	LRRC4C
ENSOCUG00000017588	1	115.362	137.465	116.528	29.2497	41.4321	38.4568	40.732	30.7368	31.2927	41.1872	43.6144	42.0099	KLHDC8B
ENSOCUG00000017601	1	5.12032	6.01836	6.50117	1.82554	1.31665	1.53461	1.20476	1.16237	1.12071	1.36578	1.26629	1.76059	CDH19
ENSOCUG00000017639	1	291.034	328.648	287.894	124.999	155.996	143.715	155.28	110.722	118.192	158.992	170.845	146.387	GDI1
ENSOCUG00000017722	1	21.2445	26.5761	32.3721	9.33867	9.70156	8.21876	8.21386	10.2883	5.9531	7.82021	11.1459	9.53164	GMPR
ENSOCUG00000017761	1	197.292	242.424	202.343	39.752	148.722	51.1198	38.1036	42.0606	42.6362	45.3666	35.9544	52.7696	TCF21
ENSOCUG00000017770	1	9.20568	10.9685	9.88491	6.54955	4.52768	7.75656	5.20711	3.77853	5.40551	4.6567	4.03076	5.5912	PIR
ENSOCUG00000017782	1	2.35524	2.43259	1.98455	0.311629	1.0736	0.305124	0.98471	0.645788	1.01213	0.783497	0.769519	1.06062	ACE2
ENSOCUG00000017790	1	1336.37	1389.55	1002.05	34.4859	48.6441	57.7534	73.9492	33.1231	51.9834	103.485	111.834	102.639	CYP17A1
ENSOCUG00000017793	1	1.48063	2.0763	1.35877	0.426729	0.780719	0.521141	0.422111	1.59924	0.604908	1.56088	1.16028	0.679946
ENSOCUG00000017826	1	104.899	133.599	130.507	45.5242	42.1446	51.758	50.2574	50.9124	38.5092	56.7329	59.9186	56.0474
ENSOCUG00000017827	1	0.463398	0.586817	0.701259	0	0	0.04332	0	0	0.0442145	0	0.121956	0	KLRG1
ENSOCUG00000017834	1	15.7915	11.8004	14.0436	6.85903	4.92886	5.66231	12.2571	9.31695	7.48906	11.5123	12.3722	5.15767	NBEA
ENSOCUG00000017845	1	2.11392	2.0254	1.55597	0.156622	0.0346873	0.0690088	0.0647878	0.0315796	0.0704338	0.109046	0.129517	0	MAB21L1
ENSOCUG00000017865	1	6.45826	4.72916	4.18354	1.33979	2.39295	3.42768	2.10065	2.24391	2.98826	4.03719	2.07737	2.26946	CAMK2A
ENSOCUG00000017875	1	1.30208	0.921624	1.28387	0.207533	0.426795	0.163287	0.735835	0.418447	0.499975	0.412836	0.582275	0.259469	XKR4
ENSOCUG00000017884	1	23.6733	21.8103	25.0105	6.28934	10.5435	5.54225	6.9196	10.1977	10.3706	12.9947	10.0407	8.48577	VEGFC
ENSOCUG00000017910	1	9.29496	5.55565	5.50598	1.61474	2.70818	2.36579	3.37216	3.08588	1.9652	4.32052	3.41521	1.89939	ZFHX3
ENSOCUG00000018870	1	#N/A	#N/A	#N/A	#N/A	#N/A	#N/A	#N/A	#N/A	#N/A	#N/A	#N/A	#N/A	#N/A
ENSOCUG00000019198	1	3.00155	1.35187	1.62742	0.818207	0.893634	0.876576	1.2866	1.49155	0.93248	1.48269	1.39029	1.12806	MIR76
ENSOCUG00000019211	1	61.2168	64.4196	40.5889	18.3819	28.4383	15.2473	13.8083	16.7368	16.1125	18.3348	15.1363	18.6485	ocu-mir-145
ENSOCUG00000020128	1	#N/A	#N/A	#N/A	#N/A	#N/A	#N/A	#N/A	#N/A	#N/A	#N/A	#N/A	#N/A	#N/A
ENSOCUG00000020175	1	#N/A	#N/A	#N/A	#N/A	#N/A	#N/A	#N/A	#N/A	#N/A	#N/A	#N/A	#N/A	#N/A
ENSOCUG00000020492	1	#N/A	#N/A	#N/A	#N/A	#N/A	#N/A	#N/A	#N/A	#N/A	#N/A	#N/A	#N/A	#N/A
ENSOCUG00000020895	1	22.7191	16.3856	18.9752	0.231458	1.69162	0.356937	0.343083	1.58673	3.05324	0.752034	0.502431	0.253208	VGLL3
ENSOCUG00000020990	1	32.8365	39.7705	37.155	5.10179	7.0498	6.19609	4.3741	2.24197	3.23555	4.02264	3.89886	4.03087
ENSOCUG00000021033	1	7.3365	14.9034	10.3588	0.856118	1.42204	2.59333	0.885348	0.215773	0.962501	1.2418	3.09732	1.87314
ENSOCUG00000021140	1	17.6489	32.2986	17.4988	0.96602	0.653722	0.532044	1.221	0.486944	1.02572	0.685035	1.27593	1.23293
ENSOCUG00000021276	1	11.717	17.0015	9.32528	5.46918	7.42388	4.37254	9.85222	3.82403	4.66118	5.62989	8.84478	11.6767	MRAP
ENSOCUG00000021287	1	21.8673	25.9775	24.1001	1.9101	8.65891	4.66825	4.19753	3.12918	4.16068	6.16456	3.82544	3.85268	HSPB6
ENSOCUG00000021311	1	194.834	211.385	174.911	6.77121	6.69159	11.0292	9.87452	6.3987	6.30785	9.6405	9.29922	7.52133
ENSOCUG00000021320	1	67.3767	66.4197	45.7698	23.4228	30.7685	22.1138	25.109	23.797	27.7196	48.6427	35.1732	29.311	RRBP1
ENSOCUG00000021324	1	79.2919	87.0469	98.2645	18.3101	16.6537	22.8711	19.2294	14.6957	16.5882	16.3787	14.8841	17.347	NDP
ENSOCUG00000021401	1	53.0541	62.4322	45.5544	14.2636	18.0966	19.7777	21.7182	17.1618	18.2923	26.9065	29.9324	31.6784
ENSOCUG00000021430	1	173.758	199.363	142.448	1.04624	1.34772	0.91726	1.92104	0.796455	1.24827	2.00691	1.5229	1.51829
ENSOCUG00000021436	1	2.29886	1.63555	1.71939	0.726901	1.11158	0.22877	0.357961	0.314066	0.194578	0.361497	0.28624	0.113601
ENSOCUG00000021480	1	49.211	58.9752	44.1215	6.49529	21.2781	6.11128	4.548	5.38861	7.83487	8.95032	4.2662	7.17967	FOXS1
ENSOCUG00000021508	1	7.73693	11.216	8.35149	4.56	4.29395	5.9395	4.49195	2.46635	3.81691	3.82372	2.83846	3.47739	INAVA
ENSOCUG00000021736	1	69.4336	94.6792	86.3911	17.1547	25.1619	15.7883	17.8182	16.3463	14.7186	17.2871	17.9658	15.3509
ENSOCUG00000021803	1	13.8162	14.6377	12.9091	1.47809	2.49412	2.57789	2.34742	1.22403	1.06827	1.75601	1.58243	1.42449
ENSOCUG00000021812	1	86.4026	103.771	94.1764	27.6614	31.7088	29.1206	31.593	27.1903	32.2635	47.9104	45.6643	42.3856
ENSOCUG00000021847	1	42.7778	40.2545	43.3382	8.51102	8.35373	12.8616	12.675	10.9204	9.01506	11.7331	14.3961	8.4259
ENSOCUG00000021916	1	49.4562	49.0705	47.5619	18.0829	25.8074	21.2015	24.7604	23.0009	17.4355	23.0461	25.4969	21.9414	TSC22D4
ENSOCUG00000021929	1	2.7909	6.71079	6.79488	0.558306	1.30518	0.888309	1.41134	3.31458	0.348712	0.215952	1.02597	0.271453
ENSOCUG00000021959	1	11.1453	6.89154	6.4218	3.1006	4.05383	3.95096	6.28903	7.52691	3.50569	6.77474	5.56872	2.79066	HECTD4
ENSOCUG00000021974	1	6.04963	2.46838	3.54756	0.646319	0.443055	0.389867	0.636558	0.496444	0.242211	0.749987	0.763526	1.14475
ENSOCUG00000021996	1	38.7654	41.0629	35.5923	14.042	21.8027	16.6426	13.778	12.8237	13.6881	12.8363	12.0698	14.7019	CDC42EP1
ENSOCUG00000022007	1	113.713	129.505	114.318	34.5074	60.9469	28.7798	35.5618	31.8618	30.148	46.2935	35.8242	37.3245	ISLR
ENSOCUG00000022014	1	42.7442	32.8457	27.4432	7.65143	17.3819	9.9929	12.9073	12.4396	10.8598	23.9762	14.9038	8.58941	NOTCH3
ENSOCUG00000022066	1	2.57292	1.89398	1.96489	0.703007	0.627107	0.924946	0.60584	0.708732	0.461045	1.06503	0.524826	0.598165
ENSOCUG00000022067	1	1.93974	2.23665	1.24545	0.760551	1.17641	0.837759	0.536829	0.206899	0.583611	1.21875	0.561545	0.660333	DLX4
ENSOCUG00000022218	1	20.8458	18.0465	18.3459	2.44623	1.67979	2.01716	2.43082	2.53504	2.41219	2.29943	2.17545	2.12294	SPRY3
ENSOCUG00000022253	1	1.43005	0.462887	1.14447	0.3851	0.113718	0.226237	0.411523	0.685884	0.158749	0.417078	0.331724	0.182558
ENSOCUG00000022282	1	4.8577	4.178	3.88052	1.27666	1.53514	1.07842	1.67663	1.72923	1.36485	1.88133	1.88637	1.18242	EDA2R
ENSOCUG00000022383	1	30.8618	32.2061	24.0237	3.1081	4.33596	1.3426	2.7573	1.61279	1.593	3.25304	3.16553	2.15011	OSR2
ENSOCUG00000022446	1	2.62829	2.24805	1.97374	0.516552	0.286003	0.711239	0	0.781139	0.145185	0	0.266974	0.141273	C3orf84
ENSOCUG00000022616	1	0.246977	0.45393	0.587321	0	0	0.0211642	0.0198697	0	0.0216012	0	0.0198607	0.0210192
ENSOCUG00000022705	1	0.469024	0.460685	0.386085	0.101043	0	0.0371004	0.104493	0.0679109	0	0.078167	0	0	CCDC63
ENSOCUG00000022711	1	3.42987	2.2119	0.906263	0	0.196982	0	0	0	0	0.206418	0	0
ENSOCUG00000022712	1	1.64778	1.30582	1.09266	0.739557	0.622404	0.505073	0.657734	0.447348	0.56539	1.11563	0.535124	0.647243	PIK3R5
ENSOCUG00000022715	1	1.09098	0.793513	0.665017	0.232058	0.33549	0.369223	0.593286	0.500389	0.304376	0.284239	0.373136	0.239761	ZFHX2
ENSOCUG00000022791	1	2.26269	0.851851	1.52697	0.0570897	0.316093	0.314426	0.177117	0.172664	0.0641838	0.0662468	0.177037	0	ART1
ENSOCUG00000022795	1	0.842348	1.02927	0.316284	0.206939	0.137493	0.136768	0.556412	0.458974	0.232654	0.432237	0.598943	0.226386
ENSOCUG00000022810	1	7.23492	5.93557	5.8389	2.74838	2.83397	3.0519	3.71675	3.01756	2.36434	2.82769	2.89845	2.17891	USP51
ENSOCUG00000022848	1	20.5179	20.2447	17.7298	7.77313	10.2847	10.1324	10.0884	8.51005	7.63726	8.73562	9.73858	6.11575	SNX33
ENSOCUG00000022858	1	0.981902	0.439764	0.956063	0.375321	0.255762	0.246463	0.492633	0.567567	0.584251	0.351767	0.499872	0.268463	RAB27B
ENSOCUG00000023010	1	8.12011	10.8987	8.48162	1.28974	2.65236	1.65261	1.46987	1.32677	1.24286	0.610859	0.707396	0.863837	KLHDC8A
ENSOCUG00000023033	1	0.434307	0.27608	0.577875	0.0579207	0.0855184	0.127601	0.0898473	0.204373	0.162795	0.190431	0.149678	0.0739241
ENSOCUG00000023063	1	77.5615	146.876	130.386	47.1147	79.737	56.9698	41.822	38.9541	39.4643	45.2242	46.356	72.3488
ENSOCUG00000023078	1	4.76353	3.52746	2.539	0.894505	1.47165	1.46389	1.71794	1.18521	1.40792	2.34287	2.19269	0.810809
ENSOCUG00000023091	1	8.11127	10.1651	8.06104	1.46924	4.04657	1.86738	1.63628	2.08888	1.82123	3.01636	2.88167	2.63763
ENSOCUG00000023102	1	6.04165	5.3718	3.20971	1.52004	2.30336	2.02684	2.06834	1.33079	1.57401	2.22802	2.56359	0.8752
ENSOCUG00000023110	1	24.4673	29.1256	25.8792	6.70825	13.8132	6.25949	6.96595	5.78478	4.45653	7.01224	6.99147	3.42672
ENSOCUG00000023226	1	24.9742	30.4381	27.7062	1.11148	4.48363	1.28261	1.28626	0.533586	0.922318	1.68897	1.53188	1.10012
ENSOCUG00000023252	1	7.46829	5.3646	3.68559	0.944168	0.885796	1.15557	1.70419	0.934231	0.889491	3.8042	2.2637	1.57325
ENSOCUG00000023263	1	15.6311	20.6984	13.2165	6.48548	7.54082	5.00071	6.81869	3.16018	4.7394	8.15288	8.26814	9.34166	NDUFA4L2
ENSOCUG00000023270	1	25.262	32.1492	22.0068	12.2658	10.2591	12.8452	15.6267	10.8633	11.9388	14.9829	15.2319	11.6399	CHST3
ENSOCUG00000023299	1	0.681014	2.37157	1.57899	0.508605	0.633608	0.910386	0.52597	0.28842	0.571805	0.73773	0.492875	0.34775
ENSOCUG00000023350	1	284.066	337.519	289.118	74.2333	135.742	80.5857	87.0707	69.1265	86.8618	115.042	114.595	104.503
ENSOCUG00000023355	1	26.2624	15.7979	13.0475	3.50817	4.53121	4.05974	4.20203	2.09435	2.34845	3.14115	2.67981	1.80936	MYO7A
ENSOCUG00000023359	1	35.4223	36.2874	28.6491	9.46479	21.9322	8.4306	10.3015	10.0425	13.8923	17.6269	12.6824	14.6045	TINAGL1
ENSOCUG00000023426	1	0.659549	0.504605	0.320816	0.19591	0.154959	0.231213	0.0723568	0.155183	0.110127	0.292286	0.173578	0.275555	SYN3
ENSOCUG00000023490	1	22.7077	21.2338	17.5096	5.95647	10.2826	5.81273	8.08038	6.98678	6.97671	10.4861	8.42792	4.3111	PRICKLE1
ENSOCUG00000023498	1	88.4648	106.662	85.3265	12.3194	45.2975	13.2204	18.1356	15.7397	18.1325	23.9178	17.3687	17.4052	TBX2
ENSOCUG00000023564	1	6.39886	5.53246	6.06046	0.988738	4.37954	1.13449	1.91718	1.28752	1.20423	2.86832	3.57712	1.78022
ENSOCUG00000023590	1	5.77191	5.76645	5.19406	0.795001	0.896651	0.697322	0.700344	0.712422	0.695169	0.837098	0.593503	0.499277
ENSOCUG00000023638	1	0.340004	0.838692	0.202136	0.277733	0.175742	0.305927	0.123092	0.159997	0.0892126	0.04604	0.0410123	0	KCNIP3
ENSOCUG00000023698	1	1.75712	0.849864	1.13168	0.273392	0.302742	0.225859	0.212044	0.137809	0.230523	0.317243	0.282598	0	ASB12
ENSOCUG00000023702	1	12.4968	16.0943	12.0471	5.47604	4.76964	5.3167	6.55833	4.99694	5.81582	6.17857	7.00285	4.99613
ENSOCUG00000023705	1	82.4914	84.3675	81.7434	4.98563	7.06743	5.52754	6.33145	5.07536	5.02091	5.82301	5.75786	5.82722
ENSOCUG00000023708	1	0.951168	0.42938	0.534063	0	0.191194	0.0271694	0.0510152	0.0745991	0.0831914	0.0858653	0.0509923	0.1619
ENSOCUG00000023836	1	24.6447	28.6077	21.4072	1.4918	0.972818	1.51544	1.66272	1.47053	1.67718	1.48104	2.09032	1.95838	NEFL
ENSOCUG00000023854	1	16.4831	14.266	12.4177	1.15715	2.09928	1.6543	2.85161	1.21622	0.913428	2.77122	3.99556	2.18164
ENSOCUG00000023860	1	4.82784	3.41404	3.16711	0.362633	1.54889	0.798892	1.01789	0.313359	0.931872	0.841596	0.214197	0.623401	ADRA2B
ENSOCUG00000023878	1	8.13521	4.68526	4.31709	0.939484	1.84146	0.920489	1.39586	1.59207	1.05058	2.06375	1.61681	0.833573	SYNE1
ENSOCUG00000023913	1	9.77261	13.133	13.4522	4.56158	5.90613	5.75904	6.24138	9.86959	4.89172	5.74114	7.5806	5.6812
ENSOCUG00000023931	1	392.341	393.212	367.452	74.342	153.216	82.3283	75.9583	72.3933	80.8633	159.793	102.525	104.631	BGN
ENSOCUG00000024073	1	27.8397	32.6068	24.7979	11.531	12.8882	13.1962	12.6305	10.7195	10.3791	13.4014	13.8316	14.6384
ENSOCUG00000024112	1	93.4736	80.0279	72.9051	31.1582	42.8517	30.5343	30.7382	28.0824	31.9408	41.0091	33.7325	26.5345	LGALS3BP
ENSOCUG00000024150	1	1.09063	1.1279	1.08458	0.240654	0.245991	0.265085	0.210583	0.186626	0.166497	0.38666	0.267894	0.121509	SYN1
ENSOCUG00000024179	1	6.95282	8.07087	4.92504	2.62393	2.90562	1.52121	2.57069	1.80994	2.32893	2.88454	1.99853	1.05755
ENSOCUG00000024221	1	27.1021	41.2158	33.8302	1.10279	1.84921	1.07591	0.651678	1.27059	0.531351	1.46248	0.977078	1.4477	INMT
ENSOCUG00000024308	1	139.201	144.716	124.072	53.7603	62.6741	52.4098	58.3695	49.3387	53.3171	65.4957	54.8877	48.7763	MMP11
ENSOCUG00000024309	1	15.3017	17.5353	15.3201	4.44637	9.35138	5.84806	5.5933	4.33205	5.20406	5.60235	5.33354	3.79335	SMAD7
ENSOCUG00000024434	1	11.3905	9.22795	8.88792	3.43374	4.293	5.61248	4.46735	3.57337	3.61136	4.49863	4.12186	3.75641
ENSOCUG00000024443	1	176.598	233.392	210.994	76.486	86.2225	61.8104	72.7995	71.2618	70.0148	80.1732	75.4647	73.5216
ENSOCUG00000024471	1	1.62946	2.09059	1.01971	0.48037	0.26597	0.176379	1.15913	0.403569	0.450052	0.650324	0.496548	0.0875852
ENSOCUG00000024474	1	19.0665	19.2195	20.1324	4.92783	8.61766	7.05948	6.51629	4.31643	4.05674	3.93715	3.42369	3.26989
ENSOCUG00000024515	1	107.221	129.169	99.2516	44.0522	56.1075	45.0207	49.1744	44.6034	47.3092	66.7672	65.8542	60.5095	OS9
ENSOCUG00000024555	1	187.396	156.442	157.094	63.3326	53.8629	65.7381	71.7299	73.1624	71.0529	72.7708	67.7292	58.5563	KCTD12
ENSOCUG00000024585	1	495.278	789.015	608.362	151.049	211.571	220.359	211.297	142.989	190.794	312.474	313.667	287.947
ENSOCUG00000024690	1	13.812	13.7426	14.1954	0.816081	0.877872	0.92461	0.988619	1.05779	0.550493	0.946978	0.771258	0.688707	KCTD8
ENSOCUG00000024756	1	12.4165	13.7356	14.448	5.6223	5.97904	7.39347	5.7118	3.97016	4.98435	2.73035	3.48186	4.55201	NUDT11
ENSOCUG00000024789	1	14.8474	18.5137	19.7324	3.62167	3.51535	3.27519	4.9244	2.09604	3.9963	4.61765	2.63441	4.67125	LPAR3
ENSOCUG00000024805	1	366.613	330.825	334.74	0.94078	1.13844	1.26063	1.71511	0.958219	0.795988	2.34092	3.05774	1.23078	COL28A1
ENSOCUG00000024939	1	5.03027	5.58231	3.57812	1.29449	2.88218	1.22871	0.911447	1.31892	0.743157	2.41299	1.26691	1.44627	IFIT2
ENSOCUG00000024947	1	15.8347	10.7596	8.26585	2.52383	5.19029	4.76578	9.69426	7.99662	6.08023	7.53079	8.94453	1.97214
ENSOCUG00000024977	1	137.612	126.222	93.8453	5.19941	5.42914	8.14882	8.40822	5.43524	4.76663	10.4471	8.6389	8.47474	ACSBG1
ENSOCUG00000025013	1	13.1191	14.0647	11.9889	1.82018	3.54168	1.51804	1.37141	1.15343	1.34475	1.14659	0.860106	0.824937	SLC45A3
ENSOCUG00000025016	1	0.384778	0.893305	0.305005	0.119736	0.176787	0.219818	0.0412746	0.120711	0.0448714	0.0463137	0	0	XKR7
ENSOCUG00000025061	1	0.683154	1.21284	1.529	0	0	0.0413234	0.0775916	0	0	0.0435323	0.0775567	0
ENSOCUG00000025091	1	61.0937	78.8979	80.0244	22.4616	23.3828	24.0577	22.4078	12.9397	13.2664	17.2962	13.2318	17.5139
ENSOCUG00000025123	1	11.809	12.2632	15.5208	0.963791	3.47956	1.26523	1.6111	2.489	1.23198	1.76183	1.81508	1.0688	GCNT4
ENSOCUG00000025140	1	0.479992	0.5417	0.428039	0.0871293	0.261883	0.21937	0.218824	0.23842	0.167925	0.303314	0.20586	0.190634	SRL
ENSOCUG00000025148	1	77.5682	90.0305	69.611	11.6736	19.7246	14.532	19.9824	18.4769	19.4365	45.1016	30.5616	29.4577
ENSOCUG00000025164	1	7.85819	7.70151	6.0001	3.07912	2.82831	1.63333	2.83941	1.15156	2.02599	2.98025	1.44473	1.92484
ENSOCUG00000025188	1	13.707	13.6251	12.4576	4.98238	4.09214	5.73119	7.79527	5.31951	4.38198	8.59764	8.01982	5.77238	HDAC1
ENSOCUG00000025219	1	48.9342	55.1145	53.6867	15.4266	27.4286	15.796	18.6496	17.2498	17.2214	17.0185	14.7108	12.1224	OAF
ENSOCUG00000025236	1	3.65213	6.64556	6.22026	2.85654	3.87748	3.04503	2.47761	1.48635	0.932371	4.17014	3.71474	4.93948
ENSOCUG00000025295	1	3.43162	3.26847	2.77249	1.19107	1.4099	1.17626	1.78389	1.11796	1.38525	1.85871	1.18873	0.718895	NTF4
ENSOCUG00000025301	1	33.3926	17.1337	23.613	2.97061	2.4176	3.1539	3.96032	2.201	1.20713	3.1979	2.95966	1.91853	CCDC24
ENSOCUG00000025335	1	11.6296	11.7521	9.37514	0.63243	0.50579	0.870791	0.508684	0.371922	0.316008	0.38732	0.562933	0.211402	SYNPO2L
ENSOCUG00000025359	1	1.16701	2.14879	1.86608	0.525944	0.499206	0.0827623	0.2331	0.189367	0.337885	0.261559	0.737819	0.287684	CHST13
ENSOCUG00000025424	1	60.6206	129.179	88.0966	20.6411	59.7915	58.1211	44.812	26.3215	30.5827	33.945	27.6947	52.6385	COX4I2
ENSOCUG00000025494	1	16.0907	19.3959	17.0064	1.74704	1.36458	0.876286	1.46793	1.17942	1.21004	1.57475	1.3544	1.29689	SCG3
ENSOCUG00000025513	1	292.257	250.616	200.904	56.4876	118.529	60.2756	81.9159	94.9155	76.6241	187.273	104.856	57.216	IGFBP5
ENSOCUG00000025617	1	7.59629	7.02338	6.30471	0.698285	2.19947	1.12812	1.05912	1.65825	1.15142	1.71061	0.769922	0.577172	CDH13
ENSOCUG00000025680	1	20.9237	23.1878	25.2195	8.25375	9.39056	8.02604	7.36484	6.51567	9.02483	5.94721	6.57431	6.91276	LRRC75A
ENSOCUG00000025694	1	2.87885	2.94222	3.3858	0.920188	1.08367	0.965335	1.17818	1.45779	0.886742	1.79659	1.96275	1.16645	RALYL
ENSOCUG00000025719	1	197.565	204.443	177.054	62.4796	62.6826	65.6598	75.3317	62.0856	59.2568	108.951	99.8298	71.78
ENSOCUG00000025757	1	24.6943	25.8118	22.7456	8.95009	14.208	9.49099	9.32039	7.6769	9.49933	12.855	8.17324	7.80553	TMEM2B
ENSOCUG00000025780	1	13.1533	13.1939	10.4547	1.66837	2.06917	2.42581	2.82954	1.41284	2.10076	2.4006	1.65557	2.11717
ENSOCUG00000025806	1	0.280848	0.423812	0.267146	0.0262184	0.0580661	0.0577599	0.0813405	0.105728	0	0	0.108405	0.114729
ENSOCUG00000025809	1	16.7909	25.7357	22.2907	4.41338	7.07798	5.86722	5.8231	4.29589	8.897	12.1851	11.4837	7.65837
ENSOCUG00000025825	1	4.94257	3.95348	3.30879	0.38774	0.64405	0.747429	0.641566	0.234539	0.174369	0.517423	0.340679	0.212088
ENSOCUG00000025851	1	6.05303	4.41443	4.73178	1.42354	2.43184	1.37683	2.62114	3.57034	3.18135	3.77716	2.27901	2.47841
ENSOCUG00000025884	1	35.8976	32.0467	37.5253	8.43951	10.5818	9.08782	9.60824	9.88177	8.1054	8.56354	7.37409	6.56217	RCAN2
ENSOCUG00000025894	1	52.7676	61.556	42.7798	19.6215	20.0005	19.7071	22.0307	20.5922	16.0584	22.6556	28.7983	26.6117	TST
ENSOCUG00000025973	1	14.0642	17.7568	21.6528	1.30773	0.405473	1.61334	1.51466	1.0547	1.2938	2.18518	2.2169	1.37339	POPDC3
ENSOCUG00000025995	1	13.1747	13.9462	14.4475	2.29415	3.81067	4.10645	4.21774	2.79468	3.47479	5.80492	4.18291	3.90404	ASB2
ENSOCUG00000026022	1	54.4583	58.3374	58.4297	4.64358	5.94001	4.67404	3.89137	1.37213	5.58064	6.68905	2.73101	5.3427	DERL3
ENSOCUG00000026048	1	0.409994	0.169973	0.278566	0	0.0302742	0	0	0.0275618	0	0	0	0.0598165
ENSOCUG00000026087	1	1.63704	1.23932	1.26944	0	0.0735791	0.0731912	0.0687144	0.0334935	0	0.0385518	0.0343417	0.0363449
ENSOCUG00000026120	1	109.232	105.574	115.496	9.48025	10.6579	7.77457	10.3016	12.1934	12.8044	10.8333	10.9436	9.87976	FOLH1
ENSOCUG00000026163	1	2.58549	3.087	1.40535	0.137924	0.0763655	0.683666	0.427899	0.417142	0.387657	0.800234	0.64156	0.150885	OR6Y1
ENSOCUG00000026197	1	112.509	127.989	98.6868	31.9574	65.2088	30.9152	39.4231	37.9113	36.7802	44.5958	39.085	27.8779
ENSOCUG00000026254	1	4.891	3.32666	2.81688	1.03448	1.22454	1.84676	2.06581	1.11483	0.842189	1.98688	1.51179	0.780474	CCDC159
ENSOCUG00000026260	1	34.9749	38.675	36.8886	12.4052	24.4466	16.7327	19.3098	13.2342	12.5839	14.9037	12.7963	8.40776
ENSOCUG00000026290	1	3.55883	3.1438	2.28875	0.438798	0.0694151	0.25318	0.345737	0.400241	1.62092	1.40631	1.38233	0.480032	SERPINE3
ENSOCUG00000026292	1	0.942765	0.890515	0.274747	0.224343	0.229317	0.123559	0.294464	0.608919	0.746959	0.520653	0.321089	0.132152
ENSOCUG00000026304	1	104.308	150.714	132.659	47.6611	80.3041	40.2798	37.2849	59.3367	51.6203	85.7001	68.0595	78.0974	ECRG4
ENSOCUG00000026348	1	30.4922	22.8138	25.9303	1.58482	1.46247	1.18619	1.95411	1.47483	1.02794	2.12195	2.28927	1.33365	KCNIP2
ENSOCUG00000026354	1	34.3422	49.2683	40.4208	4.29447	15.3732	4.31392	4.18971	5.33693	4.52446	7.08318	5.10915	4.63893	PGF
ENSOCUG00000026378	1	19.9988	22.6859	19.3519	6.90767	10.4751	8.43281	9.49434	7.86584	8.62342	12.1341	9.92971	8.31086	GDPD5
ENSOCUG00000026384	1	3.36979	2.82844	2.13282	0.21295	0.16078	0.191919	0.29029	0.214684	0.337352	0.280803	0.280154	0.307085	HR
ENSOCUG00000026390	1	3.80212	4.1352	2.32149	0.0959311	0.10623	0.10567	0.165344	0.0967124	0.143802	0.445273	0.231378	0.244874	TRIM77
ENSOCUG00000026532	1	3.54044	6.00818	3.26943	1.57708	2.39664	1.79262	2.70664	2.18192	1.88623	3.91317	2.28921	2.22084	SCARA5
ENSOCUG00000026619	1	1.55744	1.71544	2.87243	0.181743	0.576317	0.0909966	0.256292	0.0582981	0.0371502	0.134205	0.11101	0.0632612	MYO7B
ENSOCUG00000026691	1	16.8558	22.2764	15.6186	9.41263	13.7914	8.83801	8.84233	8.95808	9.37055	8.05978	7.50146	8.96087	SLC31A2
ENSOCUG00000026770	1	14.8619	16.8974	16.7777	4.25212	8.88326	4.6355	4.01197	3.2924	4.50944	2.79772	3.01329	2.97325	FJX1
ENSOCUG00000026775	1	552.438	828.312	848.444	53.7214	71.3865	35.505	55.5556	54.159	48.3176	49.8706	44.4245	129.293	DEFB123
ENSOCUG00000026831	1	2.40642	3.36526	2.86128	0.86676	0.646404	1.05217	1.26221	1.21265	0.735821	1.12894	1.04223	0.870805
ENSOCUG00000026978	1	4.21029	3.71299	3.21948	0.444438	1.16886	0.489556	0.775595	0.742095	0.530894	1.1765	0.803959	0.607753	PROKR1
ENSOCUG00000026982	1	4.77945	4.24072	4.04985	1.05135	2.15806	2.25967	2.25404	1.34428	1.44145	1.72583	1.6964	1.1782
ENSOCUG00000027014	1	10.0746	7.40449	10.1235	0	0.198107	0.0563036	0.0528597	0.103062	0.0287331	0.0296566	0	0.0279589	MFRP
ENSOCUG00000027080	1	1.88705	1.6483	2.06602	0.505819	1.23613	0.710869	0.414863	0.246177	0.549063	0.890546	0.396647	0.553351	NRIP2
ENSOCUG00000027150	1	13.6391	26.8932	32.8785	0.872101	0.579436	0.384254	0	0	0.196094	0.202397	0	0
ENSOCUG00000027164	1	2.98563	1.78877	1.66047	0.269731	0.298688	0.495189	0.74384	0.498534	0.252707	1.14765	0.789975	1.72129	PPP1R36
ENSOCUG00000027208	1	0.46515	1.00276	0.474061	0.248136	0.206081	0.0683315	0.192456	0.187618	0.139485	0.0719841	0	0.135727	MYBPHL
ENSOCUG00000027267	1	0.949704	0.971627	0.382785	0.195351	0.232963	0.0827623	0.29526	0.24239	0.0168943	0.156935	0.186396	0.213708	ESPNL
ENSOCUG00000027359	1	15.3417	20.6329	15.7742	3.9947	11.1699	6.09263	5.01534	3.46154	2.61355	2.68205	2.11295	1.72465	TSPAN11
ENSOCUG00000027402	1	4.29712	2.66033	3.15077	1.00289	1.51776	0.920583	1.08899	2.66245	0.789257	1.28013	1.53772	0.383996
ENSOCUG00000027478	1	0.522548	0.439769	0.543655	0.134151	0.202572	0.107469	0.214403	0.159833	0.082266	0.268882	0.0630313	0.146757	SGIP1
ENSOCUG00000027526	1	0.836341	0.720293	1.12274	0	0.0557794	0	0	0.025391	0.0283155	0	0	0.0275526
ENSOCUG00000027575	1	42.3429	48.7868	40.9611	17.3665	15.4373	17.5122	23.2952	16.9863	15.4215	22.164	25.1492	16.7498	KCNH2
ENSOCUG00000027759	1	18.771	17.6909	14.8845	3.46397	6.83549	3.22149	3.76816	3.6976	3.97526	5.27135	5.4143	5.03515
ENSOCUG00000027792	1	33.1368	40.1826	30.2538	8.42418	8.411	8.82302	10.9969	8.07511	9.78151	6.57035	6.99486	8.6115	TMEM52
ENSOCUG00000027853	1	99.3127	107.525	96.8956	25.8209	45.8639	47.6264	36.6488	26.2933	27.5683	26.2424	29.6462	28.5317	PGAM2
ENSOCUG00000027865	1	192.517	186.235	152.013	14.6634	11.9732	22.3681	27.7548	13.0358	18.4338	50.8743	44.645	38.6451	CYP11A1
ENSOCUG00000027880	1	78.3443	62.187	67.5106	16.756	35.6366	17.7243	16.7989	18.2206	13.9344	22.2191	18.4573	8.99736	ZEB2
ENSOCUG00000027912	1	7.88625	7.61502	4.99878	2.81843	4.05439	2.56778	3.29602	3.51854	2.65042	4.76821	2.65469	4.66815	PRX
ENSOCUG00000027943	1	16.8568	20.3772	16.1266	4.52201	6.64992	3.34728	4.60157	2.62589	1.9929	3.94599	3.21591	3.16604	C19orf38
ENSOCUG00000027971	1	13.8158	14.5452	10.0706	5.32728	5.86194	4.58329	5.10323	5.52896	6.69536	8.64146	7.59343	5.43528	SYT11
ENSOCUG00000027997	1	34.4498	43.0873	43.7306	0.86063	1.75557	0.798314	1.35844	3.65322	0.712949	0.840988	4.16714	0.842398	TESC
ENSOCUG00000028026	1	23.0032	15.9722	12.2479	4.13133	9.20436	4.82253	7.00642	6.83739	6.39637	12.1813	8.59194	5.31395	STAB1
ENSOCUG00000028035	1	0.241282	0.616178	0.48771	0	0	0.0992454	0.0232937	0	0.101295	0.0261376	0	0.0246414	ASB18
ENSOCUG00000028053	1	136.574	114.845	154.45	31.3784	85.9368	33.6894	29.6972	46.6506	42.1807	45.6768	35.3552	27.5076	ASPN
ENSOCUG00000028060	1	4.3101	7.16673	5.2633	0.217496	0.240845	0	0	0	0	0.252381	0.11241	0
ENSOCUG00000028074	1	6.04807	4.54277	7.8258	1.66063	0.459727	1.09753	1.11626	0.837078	1.86698	1.73429	1.45907	1.63501	DHRS2
ENSOCUG00000028083	1	5.81922	4.50333	8.45676	0	0	0	0	0.608528	0	0	0	0	PPY
ENSOCUG00000028563	1	#N/A	#N/A	#N/A	#N/A	#N/A	#N/A	#N/A	#N/A	#N/A	#N/A	#N/A	#N/A	#N/A
ENSOCUG00000028985	1	40.1481	71.4597	62.058	4.99734	3.45865	3.44041	1.93798	1.25951	2.10687	2.89945	0	2.05011
ENSOCUG00000029019	1	51.8153	50.7787	44.5276	7.60991	24.6131	8.29945	9.35017	7.74784	9.48732	9.79226	6.54217	8.32502
ENSOCUG00000029053	1	31.2391	51.5309	39.0988	0	0	0	0	0	0	0	0	0
ENSOCUG00000029070	1	18.0151	15.5039	16.4908	4.31069	6.80091	5.95665	7.16614	7.7025	5.42826	7.34182	6.8435	5.13833	ZNF385D
ENSOCUG00000029073	1	12.7196	11.7007	6.31151	1.54272	1.44211	0.948978	1.2846	2.2959	2.07981	2.90612	2.21598	1.58541
ENSOCUG00000029123	1	0.839062	0.649325	0.249415	0	0	0.0719017	0.0675037	0	0.220159	0.15149	0.0674734	0	SHOX2
ENSOCUG00000029135	1	1.64388	1.45117	1.26406	0.505419	0.651262	0.536483	0.997833	0.713349	0.568223	1.16231	1.03538	0.804238	ZFP92
ENSOCUG00000029143	1	4.0393	2.10998	2.12696	0.175076	0.0596528	0.118676	0.236762	0.190079	0.211972	0.296923	0.417628	0.309392	DSC3
ENSOCUG00000029173	1	2.15867	2.0442	2.29652	0.583352	0.734066	1.13911	1.37107	0.454443	0.476975	0.738459	0.904496	0.957255
ENSOCUG00000029183	1	5.4455	7.20954	4.09487	1.15412	1.76488	1.15021	0.852515	0.831084	0.525191	1.05226	0.823728	1.14233	UBAP1L
ENSOCUG00000029212	1	25.6532	21.0201	16.9073	6.47475	8.03983	8.14664	9.74954	7.78381	6.67016	8.8336	9.01707	4.53442
ENSOCUG00000029219	1	85.8039	96.39	87.2587	3.96099	3.36597	5.55146	3.70533	3.82653	3.62098	6.43303	6.00727	6.67641	DHH
ENSOCUG00000029348	1	0.377686	0.518133	0.326601	0	0.0709889	0.141229	0	0	0	0.0371946	0	0	KRT2
ENSOCUG00000029466	1	4.45118	4.3391	3.12874	1.63001	1.90669	1.18856	1.09212	1.15724	1.00662	0.799208	1.30521	1.93387	TMEM35B
ENSOCUG00000029467	1	2.82315	1.77409	2.3977	0.871908	1.0094	1.15687	1.14759	0.799099	0.73519	1.93154	1.14707	0.845451	TMEM154
ENSOCUG00000029475	1	4.03024	5.68505	5.82322	1.42876	2.79513	1.78365	2.80733	2.30464	2.40945	2.21057	2.51069	2.91764	MYPOP
ENSOCUG00000029510	1	1.83995	1.41019	1.73897	0.715699	0.524291	0.861125	0.774294	0.79923	1.176	1.06048	1.13816	0.313181	ANKS1B
ENSOCUG00000029521	1	112.867	123.337	106.367	27.6886	24.1418	26.2437	30.2104	22.7208	24.5252	33.06	38.8633	38.1112
ENSOCUG00000029526	1	15.6273	24.5863	19.6913	3.62425	5.99459	6.56939	5.93036	3.88501	4.79668	9.04995	10.5276	8.03002
ENSOCUG00000029576	1	18.7897	20.5006	26.6089	7.95503	5.20926	8.18821	8.74295	10.4358	9.09322	12.9903	13.1315	11.0572	CTNNA2
ENSOCUG00000029586	1	0.966095	2.09662	1.54825	0.235276	0.0434224	0.259161	0.121655	0.118596	0.132256	0.0910047	0.202666	0.257385	PLA2G2C
ENSOCUG00000029605	1	2.23478	4.14066	1.6863	1.5647	0.97741	1.23742	1.12024	0.687604	0.631484	0.744893	0.746491	0.438907
ENSOCUG00000029611	1	5.08435	5.86841	8.20937	0.350592	0.477821	0.118825	0.167336	0.299071	0.394157	0.500709	0.0278768	0.0885086	IL7
ENSOCUG00000029626	1	2.21996	2.9796	2.43336	0.388582	0.573731	0.570706	0.870672	0.58762	0.800924	0.751515	0.836808	0.602221
ENSOCUG00000029630	1	12.4423	20.8748	13.5228	0.0907457	2.21073	0.399831	0.0938439	0.548908	0.102022	0	0.187603	0.297819	ALKAL2
ENSOCUG00000029644	1	37.7227	47.0107	37.3948	2.12193	5.62578	1.8429	2.23657	2.11864	2.66086	3.3146	2.1512	1.45083	ICAM1
ENSOCUG00000029668	1	0.180313	0.269111	0.0765699	0.0360708	0.0266288	0.066221	0.111907	0.0484861	0.0270353	0.0139522	0.0372855	0.0131535	TMEM132D
ENSOCUG00000029776	1	2.87076	3.63534	3.87885	0.974538	1.21406	2.14694	2.51953	1.65793	1.84889	1.55492	1.51104	0.599691
ENSOCUG00000029837	1	94.1533	78.3442	66.2545	15.0067	17.2287	14.8632	16.7417	17.2425	15.8967	35.0104	26.3477	26.574
ENSOCUG00000029841	1	2.50198	1.11705	1.46457	0.539011	0.915211	0.79164	1.00334	0.760761	0.484792	0.959049	0.780029	0.353797
ENSOCUG00000029854	1	0.770701	0.372764	0.381824	0.119914	0	0.0660436	0	0.241781	0.0674073	0	0	0
ENSOCUG00000029958	1	4.42982	3.85053	2.90816	1.34255	1.96415	1.21977	1.41879	1.53131	1.58649	2.01274	1.20543	1.26502
ENSOCUG00000029961	1	1.11894	0.259775	0.114038	0	0	0	0.0308642	0	0.100662	0	0	0.0326498
ENSOCUG00000030103	1	0.319876	0.779759	1.40725	0.0895855	0.0330677	0.0986799	0.0926441	0.24084	0.235008	0.277213	0.401277	0.16334
ENSOCUG00000030225	1	8.0875	6.18646	4.2903	0.251668	0.621684	0.14927	0.36036	0.507435	0.391764	0.606534	0.700386	0.232961
ENSOCUG00000030290	1	9.6364	10.9749	7.56651	3.56446	3.66518	1.77619	5.70476	1.96786	1.81286	5.21947	5.61447	5.75627	FAM24A
ENSOCUG00000030338	1	3.46884	2.80428	1.5467	0.578272	0.192106	0.318488	0.657816	0.233192	0.390077	0.603922	0.298873	0.126522
ENSOCUG00000030433	1	0.409242	0.219254	0.224583	0.0881643	0	0	0.0607829	0.0888823	0	0	0	0
ENSOCUG00000030440	1	9.71359	6.69702	4.82985	0.686975	0.334719	1.36209	0.852515	0.581759	0.834127	2.23206	1.81788	0.75153
ENSOCUG00000030473	1	1.38189	2.55892	2.15166	0.215009	1.46256	0.0338337	0.0635284	0.123863	0.172661	0.356422	0.444499	0.268815
ENSOCUG00000030475	1	1.22368	0.98485	1.00879	0.137083	0.253	0.134222	0.220521	0.184266	0.154118	0.176746	0.110211	0.0499884
ENSOCUG00000030606	1	9.61632	16.2875	16.08	0.544794	0.760658	0.887104	0.465413	0.238796	0.372821	0.384804	0.710047	1.0365
ENSOCUG00000030703	1	24.0211	18.7925	17.489	7.40063	6.71408	4.56704	5.57861	4.09001	4.41073	6.77702	7.14294	8.14484
ENSOCUG00000030868	1	1.06682	1.23837	0.820776	0	0	0	0	0.059061	0	0.135961	0	0.0640891
ENSOCUG00000030903	1	26.45	25.917	28.5471	11.3671	13.0018	12.867	14.091	14.7541	13.9216	14.0201	13.9535	13.5538
ENSOCUG00000030915	1	0.348339	0.646967	0.497018	0.130076	0.0720202	0	0	0.0655677	0.0731198	0	0.0672283	0
ENSOCUG00000030919	1	3.94409	4.39445	5.04743	0.0739354	0.671356	0.17917	0.0611677	1.16279	0.0664982	0.15443	0.336271	0.0647065
ENSOCUG00000030971	1	0.480147	0.334415	0.399633	0.0896478	0.12409	0.0740614	0.16224	0.0677834	0.0251969	0.208054	0.347501	0.049036	SLC47A1
ENSOCUG00000031027	1	0.75368	0.89203	0.421713	0.0827757	0.198601	0.0759824	0.128403	0.0973582	0.108572	0.12807	0.0855633	0.0452771
ENSOCUG00000031034	1	1.07763	1.50111	1.40946	0	0	0	0	0	0	0	0	0
ENSOCUG00000031211	1	10.7264	8.1476	7.10226	0.606437	2.75168	0.651708	0.810695	0.790315	0.814827	0.978325	0.611571	0.436889
ENSOCUG00000031274	1	118.935	100.831	73.6478	27.0383	20.1234	43.4607	39.764	28.6905	21.3117	38.1532	37.2904	35.5271	BLACAT1
ENSOCUG00000031298	1	0.804682	0.732117	0.646475	0.223332	0.17986	0.156548	0.188965	0.143278	0.182606	0.188475	0.104933	0.155475
ENSOCUG00000031319	1	1.81474	0.580067	1.31342	0.294633	0.462207	0.405679	0.939468	1.08912	0.634886	1.02567	1.34512	0.21488
ENSOCUG00000031338	1	0.491843	0.697809	0.584811	0	0.0564945	0	0	0	0	0.118401	0.0527356	0
ENSOCUG00000031370	1	0.855697	1.27266	0.286155	0.299562	0.193504	0.137489	0.206526	0.0755004	0.0841965	0.376578	0.283846	0.245784
ENSOCUG00000031409	1	114.824	123.143	97.6166	27.1566	52.3156	36.9801	36.0064	29.9209	41.9452	71.1559	56.8827	54.5451	PCOLCE
ENSOCUG00000031431	1	0.571267	0.795756	1.04151	0.213321	0.0393704	0.0391628	0.0735348	0.0358431	0.159886	0.123769	0.110253	0.0388946
ENSOCUG00000031475	1	0.239774	0.147351	0.117392	0	0.0291611	0.0580148	0.0408497	0	0	0	0	0
ENSOCUG00000031506	1	50.5986	48.4168	36.6667	8.91102	20.3149	6.00469	9.70374	11.5963	15.7451	21.6139	10.8739	6.27081
ENSOCUG00000031535	1	3.80817	5.05205	3.30615	2.01738	2.67137	2.06678	2.10084	1.49335	1.14196	1.326	1.92491	1.66679
ENSOCUG00000031602	1	1.45685	0.845561	0.6299	0.247279	0	0	0.127861	0.0623233	0	0.215207	0.191705	0.0676291
ENSOCUG00000031652	1	1.09785	1.59299	0.870243	0.170815	0.189153	0.282234	1.05988	0.0861033	0.0960206	0.198214	0.264852	0
ENSOCUG00000031721	1	3.32909	3.31236	4.05259	0.517975	2.04851	1.22263	0.612183	0.596793	0.415957	0.0858653	0.382442	0.40475	HSBP1L1
ENSOCUG00000031735	1	17.3286	15.0253	15.7658	7.31895	7.92337	5.19428	7.51803	11.2742	10.2165	8.75889	6.19451	10.4607
ENSOCUG00000031777	1	2.17931	0.888834	1.12054	0.219944	0.304446	0.181704	0.398044	0.388038	0.185456	0.191417	0.341027	0.0601532
ENSOCUG00000031930	1	7.19043	10.8713	9.42035	2.85907	5.25373	3.65137	4.19934	2.75703	3.23763	3.89464	2.91252	4.01166
ENSOCUG00000031952	1	0.238531	1.17678	0.425427	0	0	0	0	0.112247	0	0	0.172634	0
ENSOCUG00000031989	1	0.54014	1.35046	0.741042	0.155152	0.773139	0.256354	0.240674	0	0.174432	0.270057	0.0801886	0.169732
ENSOCUG00000032007	1	50.2958	60.0493	54.3252	20.0222	25.3725	21.0452	22.5284	18.1241	20.3701	25.1153	21.2794	23.4462
ENSOCUG00000032064	1	0.872505	0.253202	0.0235778	0.0370237	0.122995	0.122347	0.0765756	0.130638	0.0624365	0.0214811	0.0382706	0.0405029
ENSOCUG00000032070	1	1.43708	1.233	1.48584	0	0.161479	0.192753	0.301605	0.352827	0.26231	0.439955	0.241175	0.638107
ENSOCUG00000032092	1	30.5299	20.2268	19.8479	3.48574	10.9744	7.52863	9.75403	4.06537	2.9968	5.63106	4.02703	2.16835
ENSOCUG00000032142	1	152.856	152.386	138.984	58.7578	40.8985	53.6274	41.6667	35.5418	11.3244	37.0133	34.7066	40.4042
ENSOCUG00000032226	1	6.042	4.49414	5.92859	2.02619	2.42564	1.74931	2.03874	1.3802	1.6623	1.90637	0.849092	0.838711
ENSOCUG00000032246	1	1.48277	1.41385	1.09141	0.659159	0.894156	0.853137	0.732788	0.332264	0.629907	0.439809	0.715425	0.612935
ENSOCUG00000032258	1	0.689822	0.252868	0.172676	0.0338936	0.0375323	0.0373344	0.175254	0.0341697	0.114316	0.0393301	0.0700702	0.0370787
ENSOCUG00000032261	1	28.6384	26.8778	19.0928	0.217496	0.518743	0.552866	0.674764	0.573468	0.507854	0.951284	0.916575	0.567381
ENSOCUG00000032359	1	16.4815	34.3725	29.8935	1.04313	0.28878	0.287258	0	0	0	0	0	0
ENSOCUG00000032426	1	3.42987	3.98142	3.17192	0.355771	2.88908	0.718461	2.14619	2.03246	1.2666	2.95866	2.81943	2.59469
ENSOCUG00000032458	1	0.756747	0.649279	0.665059	0	0.034013	0.0338337	0.0635284	0.0309657	0	0.0356422	0	0
ENSOCUG00000032485	1	0.497001	0.741757	0.675365	0	0.146795	0.0730106	0.0342724	0	0.0745181	0.11537	0	0.290042
ENSOCUG00000032667	1	5.02248	3.65618	3.44139	0.874165	0.352004	0.61276	1.39711	1.36199	0.714757	1.1066	0.657167	1.13019
ENSOCUG00000032778	1	138.787	70.7287	68.4229	22.1206	0	6.96177	6.53595	6.37164	10.6583	7.33391	9.79952	6.91408
ENSOCUG00000032789	1	26.2233	36.3591	39.8412	7.4802	15.4369	13.8575	16.1744	6.51279	11.0855	9.07455	17.9244	18.97
ENSOCUG00000032835	1	0.851073	2.69781	1.36223	0.18335	0.541422	0.134642	0.284414	0.21565	0.240488	0.0709195	0.126349	0.167149
ENSOCUG00000032962	1	27.8594	25.2706	23.7127	7.39025	13.3771	9.39287	10.2881	10.4593	11.3444	18.1407	14.9844	11.9716
ENSOCUG00000033080	1	1.2734	2.39323	1.2978	0.226434	0.940285	0.187066	0.292706	0.285347	0.190928	0.39413	0.292574	0.247712
ENSOCUG00000033095	1	28.6201	31.6273	28.2607	7.91884	11.8381	10.1533	10.2856	9.3884	9.63289	18.4331	14.7176	17.8977
ENSOCUG00000033121	1	1.48917	1.14213	1.16989	0	0.0549803	0	0.0513453	0.150163	0.0279099	0	0.128305	0.162947
ENSOCUG00000033140	1	6.56677	6.67993	6.18477	1.69392	3.64435	2.07912	1.65165	1.87035	2.21274	2.1341	1.78432	1.51778
ENSOCUG00000033142	1	35.3177	32.9696	27.8977	8.76144	9.95734	11.4287	20.2671	8.83279	9.59093	6.9562	10.7248	12.6115
ENSOCUG00000033177	1	1.75676	1.15741	1.242	0	0	0	0	0	0	0	0	0
ENSOCUG00000033212	1	0.387797	0.29358	0.521241	0	0.01743	0.0520144	0	0.0317369	0	0.0365299	0.0976219	0.0516581
ENSOCUG00000033269	1	1.78551	2.02946	2.21147	0.694524	1.69199	0.879784	0.861883	0.735189	0.702744	0.765628	0.789705	0.759789
ENSOCUG00000033275	1	39.1736	36.4734	22.6237	1.73295	0.59263	1.57201	2.87266	2.72336	2.03424	2.3362	2.63428	2.53702	MMD2
ENSOCUG00000033373	1	3.25129	2.02273	0.682207	0.138866	0.19771	0.152964	0.205153	0.299994	0.200728	0.20718	0.164049	0.217022
ENSOCUG00000033446	1	0.784222	0.533641	0.546611	0.277695	0.0838657	0.278078	0.313283	0.458111	0.567641	0.117177	0.313142	0.138087
ENSOCUG00000033450	1	20.5328	18.32	14.2335	7.09103	9.07314	8.6113	11.194	10.2306	8.36656	14.0435	9.76448	10.1422
ENSOCUG00000033457	1	46.4243	40.2043	38.5025	7.92431	14.5844	12.3657	17.5785	9.9614	10.2151	21.0301	18.329	14.8229
ENSOCUG00000033465	1	8.89507	14.856	9.49718	2.71149	9.94606	2.98675	2.54119	3.92951	3.42948	3.83468	3.24074	3.80056
ENSOCUG00000033501	1	0.573817	0.380623	0.0974685	0	0	0	0.118708	0.270023	0.0430178	0.0444004	0	0.0418587
ENSOCUG00000033536	1	105.322	113.08	96.2889	41.754	45.3901	44.0474	41.1624	33.2448	39.9189	37.1949	46.8931	42.0731	FDPS
ENSOCUG00000033564	1	0.773841	0.612463	0.669172	0.131348	0	0.180853	0.135833	0.0331045	0	0	0.0678858	0.143691
ENSOCUG00000033580	1	1.37013	0.79523	0.10182	0.0799426	0	0.0880581	0.041336	0	0.0898764	0	0.0413174	0
ENSOCUG00000033625	1	25.9277	27.5401	30.8285	1.54224	1.89757	1.65162	1.77211	1.1661	1.49307	2.13759	0.442828	0.702987
ENSOCUG00000033664	1	4.19719	5.51319	4.24633	1.09986	2.35976	2.0823	1.70612	1.21277	1.15925	1.11674	1.10137	0.789612
ENSOCUG00000033707	1	0.965678	0.611435	0.678488	0.0819549	0.226883	0.135412	0.254259	0.495734	0.184278	0.380401	0.381217	0.403453
ENSOCUG00000033714	1	3.1797	2.92874	2.87664	0.0967954	0.428747	0	0	0.130112	0	0.0374404	0.300165	0	GLYAT
ENSOCUG00000033796	1	1.8525	1.37259	0.890435	0.294364	0.488948	0.243185	0.304414	0.148381	0.248207	0.384277	0.152139	0.0402532
ENSOCUG00000033841	1	12.5128	12.0394	12.4912	1.74907	2.97444	4.61015	2.84238	2.45605	1.19389	5.21901	3.9388	3.28017
ENSOCUG00000033942	1	103.44	108.609	95.4263	0.993819	1.40621	1.33798	1.71292	1.05757	0.931094	2.94713	2.11165	1.81201
ENSOCUG00000033970	1	15.3016	12.2059	13.2939	2.7102	3.7917	3.53143	4.0537	3.85184	3.38883	4.41821	3.16361	2.27789
ENSOCUG00000034003	1	8.68441	8.11779	9.56507	0.469369	0.850514	0.940033	1.27968	0.817331	0.623638	1.38639	1.10267	0.560156
ENSOCUG00000034031	1	1.48095	2.82424	1.76088	0.197505	0	0	0.408497	0.497784	0	0.916738	0.61247	0.648195
ENSOCUG00000034092	1	1.43148	0.997005	1.02124	0	0.221973	0.147202	0.138198	0.0673619	0	0	0.138136	0.146193
ENSOCUG00000034154	1	6.52652	5.18102	4.30563	1.70336	3.9901	2.26597	1.93767	1.78328	1.17848	2.98007	2.19414	1.31873
ENSOCUG00000034250	1	2.70717	1.61372	2.43591	0.683044	1.96657	0.639527	0.741683	0.447595	0.38396	0.792603	0.776652	0.635146
ENSOCUG00000034251	1	0.962895	0.94125	1.38593	0.378487	0.130975	0.286625	0.464798	0.333873	0.159569	0.796041	0.611301	0.646958
ENSOCUG00000034369	1	0.472826	0.290572	0.264564	0	0.0575048	0.0858024	0	0	0	0	0	0.0568097
ENSOCUG00000034435	1	0.126197	0.183112	0.356369	0	0.0163072	0	0.015229	0.074231	0	0.0683533	0	0.0644404
ENSOCUG00000034457	1	256.654	272.541	279.165	125.708	111.839	211.847	225.556	106.152	123.21	135.897	119.946	106.961
ENSOCUG00000034483	1	3.62094	1.0847	1.15736	0.218084	0.482994	0.280261	0.338295	0.842798	0.449504	0.632661	0.976858	0.715734
ENSOCUG00000034619	1	0.431952	0.473557	0.199733	0.0896104	0.0496153	0.0246768	0.162172	0.0903402	0.0251864	0.0779878	0.254728	0.0245078
ENSOCUG00000034634	1	2.76995	3.93883	2.79949	2.26264	1.14539	1.21056	2.20618	1.89002	1.16288	1.50032	1.26965	1.20227
ENSOCUG00000034638	1	15.973	20.1647	16.4982	9.89077	8.78431	9.67816	6.28245	6.93437	5.08012	4.54428	3.89233	9.06261
ENSOCUG00000034698	1	34.7258	30.6643	34.2114	11.8095	14.8722	12.1156	16.7625	15.2906	18.6137	27.9447	30.6376	21.912
ENSOCUG00000034739	1	1.08409	0.948971	0.52828	0.414773	0.238837	0.49343	0.634823	0.769398	0.242483	0.365789	0.377293	0.23595
ENSOCUG00000034874	1	1.42088	1.71045	0.782154	0.6141	0.707228	0.838787	0.9653	0.965797	0.552327	0.7126	0.609389	0.322467
ENSOCUG00000034940	1	24.023	27.8331	27.0433	10.4458	11.4728	14.1363	15.2998	12.2502	14.8596	19.2952	16.9677	13.8529
ENSOCUG00000034965	1	8.07447	9.79257	25.1481	2.25011	1.99334	1.11534	2.6178	21.0398	2.33999	1.69717	7.55914	2.58464
ENSOCUG00000035002	1	5.08662	6.38172	4.82626	1.43897	1.64656	1.84922	2.43056	2.51452	2.15703	2.28202	3.32192	2.57117
ENSOCUG00000035036	1	0.27633	0.160383	0.117343	0.0184261	0.071415	0.0304451	0.123859	0.222915	0.0932212	0.267271	0.0857101	0.100788
ENSOCUG00000035165	1	3.37401	2.32093	2.45163	0.349977	0.516732	0.449756	0.482567	0.588045	0.327888	0.541483	0.663232	0.255243
ENSOCUG00000035226	1	4.0393	5.40892	4.92288	1.8181	2.47559	2.29936	2.0473	1.58852	2.36198	2.34413	1.83756	3.25598
ENSOCUG00000035272	1	0.709856	1.70294	0.45015	0	0.0978433	0	0.0456871	0.0890772	0	0.20506	0.0913332	0.0483303
ENSOCUG00000035276	1	0.074515	0.0332683	0.0340768	0.0133775	0.0177764	0.0117884	0.0304353	0.0350648	0.0240637	0.0248372	0.0359529	0.0204885
ENSOCUG00000035342	1	13.8685	13.0012	12.0648	3.17936	3.88364	2.56341	3.86415	3.56874	3.79554	6.35173	5.89526	5.77298
ENSOCUG00000035368	1	1.69252	3.4382	2.26399	0	0	0	0	0	0	0.343777	0	0
ENSOCUG00000035396	1	0.571646	0.44238	0.528654	0.0592952	0	0	0	0	0	0	0	0
ENSOCUG00000035434	1	5.73069	6.42124	6.48266	3.17647	2.90038	2.80324	3.2465	2.1349	1.77515	2.32798	2.03535	2.86533
ENSOCUG00000035463	1	1.94338	0.563972	2.3749	0	0	0	0.104232	0	0	0	0	0
ENSOCUG00000035500	1	0.80371	1.11954	0.812283	0.112545	0.249254	0.12397	0.310366	0.113461	0.0843533	0.261194	0.504119	0.287282
ENSOCUG00000035519	1	2.79992	2.65145	3.32915	0.481498	1.21872	1.21229	1.84948	1.17888	1.15999	1.2771	1.70645	1.27924
ENSOCUG00000035532	1	1.7983	4.8012	2.9935	0.671518	0.743609	0.369844	1.38889	0.846234	0.377481	1.16884	1.0412	0.550966
ENSOCUG00000035541	1	103.132	77.3583	53.6422	17.717	32.957	11.8673	19.704	23.4809	21.4578	48.645	27.5294	17.8841
ENSOCUG00000035603	1	40.4533	47.4558	37.1607	9.78858	14.5925	12.104	11.2548	12.8394	12.8509	19.1265	14.3614	20.2193
ENSOCUG00000035624	1	4.1104	3.49428	3.32485	1.38369	1.46905	1.24132	1.77023	1.9702	1.66789	1.96979	2.55093	1.15479
ENSOCUG00000035633	1	107.165	59.8608	27.2588	30.3439	24.1601	39.2273	42.8316	32.9845	18.0217	30.1838	26.3502	16.6451
ENSOCUG00000035647	1	2.6531	2.12501	1.8612	0.743035	0.959938	0.763901	0.794017	0.54933	0.918902	0.632292	0.588845	0.325143
ENSOCUG00000035654	1	4.38115	3.92377	3.8533	1.53949	1.47577	1.64516	1.90888	1.37444	1.18831	1.65311	1.18757	1.02223
ENSOCUG00000035660	1	0.329964	0.306419	0.340022	0.0410714	0	0.0452409	0	0.020703	0.0230875	0.0953184	0.0424546	0.0673964
ENSOCUG00000035732	1	1.87494	1.64539	1.70321	0.266052	0.418662	0.370182	0.608193	0.875239	0.747779	1.25115	0.615157	0.490194
ENSOCUG00000035831	1	32.0956	36.0699	37.2071	6.37431	21.5156	8.22293	8.10773	8.17883	10.0406	10.9567	7.99838	8.5395
ENSOCUG00000035918	1	3.25799	2.33713	0.696416	0.478435	0.113528	0.489361	0.565451	0.0689045	0.192102	0.51552	0.565197	0.0747706
ENSOCUG00000035929	1	0.605107	0.702411	0.503638	0.112979	0.0625539	0.124448	0.116836	0	0.0635089	0.1311	0	0.0617978
ENSOCUG00000035930	1	11.4489	12.9402	11.1053	3.0939	6.54064	6.81598	12.2164	4.25332	1.89729	5.22205	4.94251	1.23078
ENSOCUG00000035966	1	2.29482	1.39965	1.96551	0.780676	1.04543	0.639947	1.10773	0.951763	1.02056	1.17977	0.638067	0.993067
ENSOCUG00000036065	1	3.45525	2.73469	2.27827	0.850394	0.909216	1.29203	2.06211	0.768631	1.022	0.952767	1.09121	1.63606
ENSOCUG00000036117	1	1.00131	1.02558	4.20202	0.329917	0.426224	0.121136	0.227454	4.43471	0.370913	0.510446	1.87565	0.240613
ENSOCUG00000036141	1	0.578195	0.847797	0.398018	0.056818	0.0314589	0	0	0.0572808	0.0958175	0.0659315	0.20556	0.0310786
ENSOCUG00000036212	1	1354.02	2090.43	1634.1	208.566	122.477	177.525	140.523	172.034	159.874	95.3408	107.795	152.11	PCP4
ENSOCUG00000036240	1	9.14889	10.3278	10.0199	3.30666	5.9697	3.17626	3.32231	3.68117	2.27281	3.45515	3.38562	3.65167
ENSOCUG00000036247	1	4.63722	1.99937	1.52284	0.86581	0.684828	0.862875	1.10855	1.95355	0.602579	2.53563	1.53423	1.44331
ENSOCUG00000036276	1	11.9585	9.73105	7.98554	4.73615	4.07081	5.46537	3.6384	3.72883	4.28509	4.34431	3.66008	5.0085
ENSOCUG00000036279	1	5.74235	2.88376	2.37277	0.912466	0.968323	0.628185	0.943619	1.1882	1.11134	1.23529	1.37549	0.249553
ENSOCUG00000036497	1	17.7164	16.786	10.5255	2.0965	3.73417	3.70226	3.16608	2.58326	3.24245	5.77945	4.4718	3.57982
ENSOCUG00000036538	1	1.19434	1.51244	0.516399	0.202722	0	0	0.314465	0.408747	0.113957	0	0.209549	0
ENSOCUG00000036651	1	4.26703	4.81561	5.35545	1.10652	1.5929	2.49864	2.40302	1.72907	2.23923	2.6322	2.23037	2.48152
ENSOCUG00000036675	1	6.22115	7.6729	7.39707	1.9964	3.61756	1.93252	3.56607	2.62256	1.42831	2.31662	2.37631	1.32364
ENSOCUG00000036775	1	0.236813	0.824683	0.168945	0	0	0.0487038	0.0457247	0	0.0497094	0	0	0
ENSOCUG00000036869	1	9.65678	17.4259	15.2921	2.1718	2.04195	3.15961	2.03407	1.23934	1.15173	1.47405	1.56723	1.61381	SMIM41
ENSOCUG00000036888	1	2.90085	2.86223	2.50065	0.37236	0.712215	0.261012	0.980186	1.5357	0.57086	1.76762	1.39964	1.77753
ENSOCUG00000036919	1	5.00177	5.98203	5.9472	1.98095	3.18596	2.28595	1.4145	1.61669	1.85592	1.31354	0.828815	2.0639
ENSOCUG00000037050	1	98.2048	80.4216	68.7823	17.5677	23.0537	21.0133	28.5453	25.6634	22.8678	68.4311	43.2299	30.3578
ENSOCUG00000037063	1	1.71906	0.498875	0.4599	0.0802411	0.0444277	0.0441935	0.248942	0	0.270636	0.0931116	0.124415	0.0438907
ENSOCUG00000037085	1	1.24319	0.641376	0.394179	0.0515808	0.0571183	0.0568171	0.0533419	0.0520009	0.173971	0.119709	0.026659	0
ENSOCUG00000037088	1	8.41322	7.09233	6.91656	2.11387	4.3991	1.58576	2.29911	1.87389	2.29459	4.67325	2.78783	2.69128
ENSOCUG00000037200	1	7.48561	7.44801	8.90054	1.62225	4.90557	1.44329	2.19383	2.13868	1.26265	1.01363	0.902937	0.54606
ENSOCUG00000037217	1	13.9489	13.5804	9.45199	3.22049	5.58191	5.14119	6.70914	6.117	2.20389	11.8069	8.00876	5.25915
ENSOCUG00000037331	1	4.56406	3.54263	4.96908	0.64168	0.454763	0.876458	1.24754	0.595153	0.663703	0.387194	0.583695	0.421187
ENSOCUG00000037351	1	1.95764	2.74807	2.7066	0	0.235319	0.421341	0.219761	0.0856945	0	0.246591	0.395392	0.232475
ENSOCUG00000037352	1	3.52223	1.16029	2.03741	0.355477	0.246024	0.636291	0.781178	0.313575	0.64943	0.824989	1.10234	0.923593
ENSOCUG00000037357	1	9.0336	8.96319	6.51646	2.82916	4.02113	3.04472	2.94817	2.32765	2.74199	2.88044	2.11769	2.20564	TRIM16
ENSOCUG00000037425	1	57.5457	73.8201	57.8802	24.065	42.4312	16.726	17.4036	12.545	14.4213	22.0092	18.3591	17.5709	CRELD1
ENSOCUG00000037626	1	5.12077	3.26445	2.44546	0.822867	2.12615	1.12221	1.33722	1.58013	1.49781	2.31893	1.29612	1.15739
ENSOCUG00000037644	1	14.4702	12.1862	9.63011	2.60059	2.6398	3.2094	4.88072	3.27721	2.92374	3.96774	3.70868	3.10839	PRCD
ENSOCUG00000037671	1	40.2521	44.6483	36.6931	15.7546	18.4631	13.828	17.0121	12.7119	15.8346	19.735	19.5652	12.7588
ENSOCUG00000037674	1	1.50201	1.08971	1.1162	0.262911	0	0.193067	0.090629	0.0883507	0	0.101694	0.0905883	0
ENSOCUG00000037686	1	1.89039	1.50594	0.352582	0.0692064	0.095795	0.019058	0.143138	0.0872125	0.194515	0.160614	0.12519	0
ENSOCUG00000037780	1	1.41108	0.563059	0.104863	0.0411658	0	0.0453449	0	0.166004	0	0	0.0425522	0
ENSOCUG00000037812	1	26.3632	22.7704	17.036	9.07112	14.6769	5.438	11.1664	11.1799	11.1826	18.9075	17.0187	9.23181
ENSOCUG00000037930	1	4.90895	1.73682	1.39924	0.329579	0.295445	0.293887	0.146071	0.253153	0.105867	0.637405	0.178451	0.137352
ENSOCUG00000037945	1	3.69255	1.01138	1.30729	0.329223	0.621908	0.661293	0.80109	1.5619	0.566085	0.831476	0.68062	0.508462
ENSOCUG00000037983	1	1.17112	1.06623	1.31057	0.15006	0.308601	0.236134	0.177352	0.194505	0.0723028	0.547263	0.132954	0.0938064
ENSOCUG00000037996	1	1.4742	2.67197	2.24489	0.144867	0.053473	0.0265955	0	0.0243411	0	0.0840515	0.0499151	0.290547
ENSOCUG00000038032	1	2.23424	3.44349	3.41556	0.157746	0.291136	0.366827	0.163132	0.141361	0.118232	0.203387	0.108706	0.153396
ENSOCUG00000038035	1	0.686624	0.0759083	0.23326	0.0305235	0	0.100867	0.094697	0.276949	0.240215	0.354194	0.347066	0.133567	SPTY2D1OS
ENSOCUG00000038073	1	1.96857	1.14257	0.668764	0.426621	0.436081	0.506079	0.644811	0.46318	0.14758	0.571211	0.746288	0.394909
ENSOCUG00000038180	1	0.213132	0.742215	0.422363	0.0663228	0	0	0.205761	0.133726	0.0745641	0.153922	0.0685563	0
ENSOCUG00000038205	1	1.43001	0.515162	0.703577	0.0460338	0.203903	0.152121	0.380844	0.232043	0.155262	0.320505	0.428257	0.0503596
ENSOCUG00000038381	1	6.14922	5.59324	6.92959	0.29988	0.189757	0.330323	0.443027	0.172756	0.337144	0.646249	0.708524	0.234329
ENSOCUG00000038550	1	8.40052	8.79408	5.88334	3.10559	3.97362	3.47835	3.58945	3.34136	3.37413	5.04217	3.91156	3.02627
ENSOCUG00000038568	1	20.0943	14.1955	13.6	3.70035	4.78666	5.27321	6.22051	4.8513	4.74781	6.4023	5.83179	3.8847
ENSOCUG00000038633	1	34.1047	22.5267	23.0742	0.17937	0	0	0.0927472	0.0904156	0	0	0.185411	0
ENSOCUG00000038641	1	1.6325	1.42126	3.72039	0.381003	0	1.11915	0.131337	0.768212	0.428347	0.294743	0.131278	0.277871
ENSOCUG00000038666	1	1.4866	1.16899	0.826776	0.268607	0.347018	0.221906	0.185185	0.699553	0.427812	0.571434	0.462755	0.0979495
ENSOCUG00000038697	1	28.6733	21.6174	24.7627	4.24675	8.61176	3.78615	4.26823	6.36849	5.43095	8.00787	4.23887	5.00878
ENSOCUG00000038704	1	226.746	245.576	237.057	78.1612	140.722	98.477	95.6923	77.7518	85.0223	111.21	96.9601	96.2469
ENSOCUG00000038763	1	596.465	740.274	633.255	155.792	266.276	114.74	129.931	159.121	180.411	286.741	225.324	228.344	ATOX1
ENSOCUG00000038788	1	62.6498	59.0023	48.1931	14.0797	12.0736	18.0423	19.5907	18.7647	15.2341	30.142	28.0304	20.8327
ENSOCUG00000038847	1	0.593254	1.14775	0.764173	0	0	0	0.0477282	0	0	0	0	0
ENSOCUG00000038853	1	1.13066	0.656236	0.112031	0.0659698	0.0974027	0.0242223	0.159185	0.199521	0.0494449	0.229654	0.181844	0
ENSOCUG00000038922	1	1.05492	0.857187	0.188147	0	0	0.0542393	0.0509217	0	0	0	0.101798	0
ENSOCUG00000038942	1	1.44265	1.86071	1.52474	0	0	0	0	0	0	0	0	0
ENSOCUG00000039075	1	8.57063	15.6339	20.3813	0	0	3.77713	2.36407	4.60927	2.57008	10.6108	5.90751	1.25042
ENSOCUG00000039100	1	1.20245	1.39581	0.680825	0.561269	0.591928	0.647687	0.580431	0.485006	0.360579	0.558253	0.469662	0.467818
ENSOCUG00000039163	1	15.1641	17.3769	16.1811	3.62983	4.01951	5.79756	5.25526	4.94017	4.08088	10.7407	8.62976	6.94912
ENSOCUG00000039211	1	1.18302	0.88281	1.30616	0	0.17471	0	0	0	0	0.0915392	0	0
ENSOCUG00000039234	1	76.3252	41.0734	21.8953	3.43293	9.12644	3.767	6.30081	6.30093	4.50767	8.9098	6.35216	0.731037
ENSOCUG00000039242	1	8.58859	6.66279	6.42327	1.33959	2.87954	2.12657	3.36145	0.893712	0.908058	1.71447	1.30325	0.84049
ENSOCUG00000039306	1	9.59959	5.30058	11.6609	2.17986	3.00394	2.24108	2.50476	1.66042	1.74274	2.07981	1.45211	0.529934
ENSOCUG00000039321	1	3.02872	3.04699	3.12104	0.188496	0.626197	0.622895	0	0.570094	0	0	0	0
ENSOCUG00000039353	1	40.7589	57.0203	57.3014	18.5047	23.2448	19.4915	19.6747	15.2158	14.3678	15.8362	21.1004	25.178
ENSOCUG00000039363	1	1.03005	1.11598	0.489901	0	0	0	0.0662954	0.0646288	0	0	0	0
ENSOCUG00000039434	1	63.1651	61.5951	42.244	13.3874	16.0626	11.9045	14.6449	14.0166	14.2452	30.7699	19.9424	10.4744
ENSOCUG00000039593	1	3.83998	1.31841	2.50798	0.555391	0.559104	0.444925	0.835422	0.458111	0.227056	1.28895	1.25257	0.386643
ENSOCUG00000039606	1	84.4003	155.865	177.899	46.5586	39.6591	47.34	62.963	21.6636	68.4499	116.365	81.4449	94.0315
DTOCUGFOXL2	2	0.0837332	0.315894	0.248901	54.8158	39.1903	61.5645	60.3856	55.7942	60.4409	42.927	42.158	66.3377	FOXL2
DTOCUGRSPO1	2	1.40524	1.09639	0.958687	12.3873	12.6455	14.3318	19.3933	17.4965	16.4895	24.0818	22.3412	22.0916	RSPO1
DTOCUGWNT4	2	15.1553	20.6864	23.1191	53.6895	63.5159	77.0435	76.6033	50.6373	53.4212	67.9464	69.7925	73.8809	WNT4
ENSOCUG00000000108	2	15.6586	16.0606	12.3721	78.845	68.6489	92.889	81.8913	110.581	104.227	84.402	88.1209	131.889	ARL4A
ENSOCUG00000000134	2	1.73058	1.85165	1.32408	46.6129	28.6087	73.845	123.707	73.7179	91.3378	136.071	118.293	112.13	NTNG2
ENSOCUG00000000252	2	0.230686	0.462532	0.224419	2.2906	2.57987	2.63096	3.21915	2.32899	2.53121	3.9075	3.94623	4.00508	DIRAS2
ENSOCUG00000000266	2	15.8431	14.148	13.8504	53.0572	48.6389	66.6491	86.4826	52.7103	59.577	79.3194	80.9558	58.5132	WNT2B
ENSOCUG00000000271	2	2.53512	2.98125	2.38387	15.7313	17.0947	17.4646	21.5152	17.9178	17.0426	24.2855	21.6494	20.2216	MAMDC2
ENSOCUG00000000280	2	1.58757	1.07061	2.37305	20.3255	17.5371	30.8625	30.6534	12.0385	16.5512	22.7831	26.102	23.1311	TAFA3
ENSOCUG00000000303	2	0	0	0	0.0146101	0.0970716	0.14484	0.181307	0.103104	0.0164256	0.0169536	0.0755107	0.0319661	PPP1R3A
ENSOCUG00000000310	2	2.04886	1.96609	1.60785	3.94017	4.09488	5.50596	5.39336	3.81799	3.74166	4.77931	4.02014	4.31043	IGDCC3
ENSOCUG00000000597	2	3.80666	3.35722	3.09901	5.98683	5.94414	6.98252	7.07412	5.29325	5.19505	7.51674	6.12227	6.19919	RAD51B
ENSOCUG00000000660	2	0	0.0693659	0	0.0557855	0.339759	0.245795	1.44225	0.506158	0.376305	0.323667	0.345985	0.732332	TBXT
ENSOCUG00000000688	2	13.0373	18.3911	15.5017	30.4677	27.3568	35.292	30.841	29.4563	30.9914	30.6313	35.4096	31.964	FBXO27
ENSOCUG00000000703	2	0.287306	0.411978	0.200948	0.252436	0.489188	0.347577	1.35422	0.683946	0.940099	0.860469	0.636033	0.673133	MOCOS
ENSOCUG00000000718	2	0.0522193	0.0202055	0.0413931	0.324994	0.395872	0.554878	0.773005	0.540607	0.456722	0.641107	0.520704	0.0711067	SLC1A2
ENSOCUG00000000812	2	1.30452	1.30101	1.11417	3.31042	2.20329	2.96631	3.7782	3.66593	2.52618	2.48796	2.81908	1.51991	CCDC39
ENSOCUG00000000815	2	0.451086	0.374016	0.275837	2.31008	1.67874	2.04098	3.25992	3.56612	2.6783	3.32284	3.07191	2.56665	GPR75
ENSOCUG00000000869	2	#N/A	#N/A	#N/A	#N/A	#N/A	#N/A	#N/A	#N/A	#N/A	#N/A	#N/A	#N/A	#N/A
ENSOCUG00000000894	2	0	0.710631	0.363951	1.14301	3.16429	6.60998	8.56974	8.06623	6.10395	6.30014	5.61214	3.75126
ENSOCUG00000000973	2	0.555839	0.417496	0.34989	2.16717	3.21104	2.48804	3.28283	1.78478	1.81877	3.75446	3.09204	1.60281	CALN1
ENSOCUG00000001018	2	0.0552085	0.0427242	0.0437626	0.635655	0.837065	0.889424	1.17258	0.450314	0.733957	1.69451	1.7936	1.12766
ENSOCUG00000001027	2	0.681462	1.4063	0.720241	2.86279	3.63977	5.5282	3.28947	2.20912	2.82117	3.56804	2.33813	3.09314	NOBOX
ENSOCUG00000001144	2	9.72077	6.26747	6.71161	12.4118	15.432	17.3476	20.5822	15.7867	12.4646	19.4771	15.0745	10.8865	SLC6A6
ENSOCUG00000001145	2	1.17973	0.884679	0.968248	2.69972	3.6371	4.34795	4.7573	2.57432	2.94753	8.15418	7.34431	5.5763	GRIP2
ENSOCUG00000001169	2	66.959	57.9883	62.8917	80.8007	88.2394	96.317	101.696	117.346	119.403	146.538	125.96	96.4201	RGS5
ENSOCUG00000001205	2	0.113088	0.431326	0.307346	1.10097	0.918551	1.39548	1.76243	1.6421	1.54299	1.64508	1.83959	1.58391	RBFOX1
ENSOCUG00000001337	2	5.59455	6.48	4.86556	6.91046	10.4304	10.9658	14.9296	16.3477	15.6537	15.707	12.5536	11.5394	PARM1
ENSOCUG00000001353	2	19.7761	26.5775	20.7984	124.865	154.164	183.254	188.448	100.034	96.2375	35.7253	47.6821	56.4371	UCHL1
ENSOCUG00000001360	2	4.05848	3.00011	3.18106	7.37963	8.58934	9.73793	12.2515	8.80796	7.54432	9.93037	8.72902	6.00069	GAB3
ENSOCUG00000001386	2	3.65782	3.0859	2.51922	11.2238	12.6251	11.9522	15.341	12.6509	10.8249	13.403	10.9846	6.00149	CTTNBP2
ENSOCUG00000001436	2	5.03811	6.77867	5.71811	17.6832	21.1034	13.9443	17.7342	15.1331	15.8804	16.3376	17.9788	15.1351	MAOB
ENSOCUG00000001457	2	2.38869	5.5456	3.48569	42.369	36.3667	52.3643	43.8155	40.2616	35.0986	35.0505	36.3568	45.796	MYF6
ENSOCUG00000001546	2	6.05634	6.49874	4.77599	28.9688	24.0967	32.573	45.5294	38.7046	37.8546	38.4851	39.5844	39.1514	TOX3
ENSOCUG00000001603	2	0.86442	1.05718	0.256953	1.38338	1.51594	2.34922	3.45732	2.42611	2.21952	3.16039	3.12807	2.5696	LRRC14B
ENSOCUG00000001655	2	14.2289	12.4067	13.0957	77.8951	34.6737	58.4379	84.1827	86.4008	77.3601	81.8704	98.4835	90.961
ENSOCUG00000001660	2	3.88541	3.82347	3.95442	8.98591	8.51256	13.762	18.7707	12.0236	9.83401	19.2609	19.904	10.9407	VWCE
ENSOCUG00000001662	2	0.406205	0.134721	0.137996	0.75842	0.439917	0.855303	1.0084	0.764597	0.426331	0.586713	0.578638	0.237054	SLC7A11
ENSOCUG00000001830	2	1.07192	0.43425	0.838285	1.20888	2.27573	1.15406	1.92385	2.31558	1.52521	1.74569	1.85357	0.764101	DOK6
ENSOCUG00000001863	2	4.88329	6.45586	4.40437	12.6243	22.0373	22.2537	23.1994	18.2167	19.9972	30.813	32.6337	28.6868	VAT1L
ENSOCUG00000001890	2	0.166104	0.107119	0.131667	0.344589	0.305266	0.417528	0.641437	0.364765	0.309927	0.539811	0.445242	0.904729
ENSOCUG00000001980	2	0.0992452	0.134405	0.0393348	0.478691	0.359087	0.629341	0.830379	1.08972	0.572894	1.03927	1.14924	0.844635
ENSOCUG00000002301	2	3.30559	3.67211	3.25421	7.39955	7.27533	8.44314	8.06396	5.88757	5.63307	8.16288	6.41397	6.3162	CCNB1IP1
ENSOCUG00000002335	2	0.346465	0.301634	0.231724	0.869246	0.537245	0.612348	0.951187	0.957844	0.704536	0.938299	1.11793	0.608153	LRRC9
ENSOCUG00000002433	2	0.877603	0.850804	0.607745	10.3355	7.26785	8.74684	19.8592	11.6723	7.33833	9.38155	8.99918	6.19509
ENSOCUG00000002557	2	0.476944	0.960295	0.446651	1.57216	2.12491	2.21353	2.13519	1.09239	1.38655	2.36843	1.82875	1.50437	CLSTN2
ENSOCUG00000002580	2	1.5349	1.93271	1.60849	5.63444	6.70996	9.43002	6.11563	7.17386	7.35849	10.6386	9.99149	7.98386
ENSOCUG00000002630	2	5.17465	3.78012	4.09742	9.54701	14.999	10.1492	11.3587	9.91865	11.1196	11.5495	8.9753	7.52844	HAPLN1
ENSOCUG00000002636	2	0.343018	0.526404	0.269599	1.05294	1.34027	1.2794	1.74558	0.946605	0.896984	1.34779	0.964969	0.712504	FHIP1A
ENSOCUG00000002658	2	0.0728057	0.456372	0.103881	0.611707	1.15907	0.748672	0.801282	0.835955	0.901675	0.993752	1.02574	1.32351	EYA2
ENSOCUG00000002697	2	0.0654225	0.182263	0.155577	0.622963	0.568105	1.10331	0.808448	0.517207	0.288389	0.90715	0.214648	1.57681
ENSOCUG00000002716	2	0.452272	0.497368	0.367941	1.09998	0.922783	0.966873	1.40182	1.51219	1.14923	1.16038	1.16	1.37352	BTBD11
ENSOCUG00000002805	2	0.758427	0.990435	0.845423	2.33427	2.33986	3.19272	3.8898	3.1786	2.69896	3.65865	3.37346	1.88799	AMPD3
ENSOCUG00000002924	2	8.38237	9.96198	7.35645	30.3697	22.9014	23.0543	33.2691	28.1126	23.3907	18.3772	23.8172	34.9221	LGALS3
ENSOCUG00000003052	2	0.702234	0.516474	0.490784	1.75151	0.936525	1.46077	1.91482	2.32074	2.1717	1.78856	1.54668	1.17156	SLC16A7
ENSOCUG00000003061	2	0.164344	0.190771	0.0450942	0.637293	0.914809	0.662989	1.0496	0.832849	0.477656	0.260199	0.634357	0.271125	SV2B
ENSOCUG00000003087	2	0.855993	0.655598	0.66104	4.38273	4.16905	5.11804	5.54619	4.94166	4.1586	4.51214	4.079	2.12692	SLITRK3
ENSOCUG00000003240	2	0.412267	0.837484	0.326796	9.36517	4.72358	5.58189	8.88889	11.1551	9.33899	11.0162	15.7475	17.7888	IRX5
ENSOCUG00000003254	2	0.672305	0.917515	0.507716	2.45114	2.28225	2.21416	2.65762	2.56515	2.43152	2.29315	2.55998	1.98559	CDKL2
ENSOCUG00000003263	2	0.539992	0.245648	0.286324	1.15808	0.754359	1.26064	1.4301	1.39415	1.16413	1.39917	1.05625	0.715431	SLCO5A1
ENSOCUG00000003323	2	28.9807	17.9996	22.4256	39.4839	52.7877	44.7845	56.3219	46.8755	43.2597	37.1061	33.6193	22.5622	ARHGAP28
ENSOCUG00000003437	2	0.959971	0.488478	0.656709	1.98877	1.23708	1.71737	3.16118	1.48516	1.09035	0.826238	1.66236	0.49691
ENSOCUG00000003465	2	5.0677	4.3755	3.51078	8.67988	9.97973	9.69024	9.03688	11.5689	12.264	5.8754	5.71876	6.07372	PLPP6
ENSOCUG00000003511	2	2.97927	2.63624	2.5768	3.79065	3.85593	5.1902	5.7388	5.27459	4.89102	6.30134	6.43331	4.57119	GPR85
ENSOCUG00000003541	2	0.923326	0.869029	0.860478	2.63249	1.39306	1.64233	2.12007	3.05319	2.90723	2.37891	2.57666	1.83496	SLC25A53
ENSOCUG00000003550	2	0	0.0118292	0.0121167	0.0570796	0.0842766	0.199101	0.206599	0.191815	0.0427816	0.0772742	0.0688355	0.0936652
ENSOCUG00000003551	2	0.276496	0.240718	0.493138	0.613037	1.00041	1.10176	0.533867	0.943309	0.362744	0.898569	1.00055	0.988319	CELF3
ENSOCUG00000003660	2	0.850699	1.08306	0.554692	1.74204	2.12764	1.89067	2.5963	1.47213	1.41128	1.69446	2.03903	2.38218
ENSOCUG00000003720	2	18.793	14.6394	11.0988	70.3153	79.9428	91.7367	91.3863	52.5702	70.7931	60.6574	58.1418	56.9315	DUSP4
ENSOCUG00000003806	2	0.731513	0.509486	0.521869	2.54949	1.31077	1.6549	2.40113	1.58346	1.97058	1.69053	1.20003	0.771975	KY
ENSOCUG00000003831	2	1.35232	2.73877	1.1974	4.99609	5.53245	6.21338	7.38889	4.82015	5.19414	4.89355	7.10792	5.14235	C4orf19
ENSOCUG00000003850	2	0	0.511219	0.174548	1.64453	3.49041	2.56627	2.4093	2.07241	2.31111	2.54442	2.40821	3.14838
ENSOCUG00000003896	2	0.497859	0.398564	0.449076	0.673121	0.603406	0.7238	1.0773	1.19563	1.08109	1.13444	1.06025	0.648711	CAPS2
ENSOCUG00000003973	2	9.65524	14.6574	10.786	27.0116	21.2236	26.9231	27.9439	27.1727	24.4258	24.7704	30.3361	32.1162	IFT57
ENSOCUG00000004004	2	0	0.0421004	0.0431237	0.124146	0.112479	0.0497269	0.186741	0.216181	0.088819	0.248829	0.0583305	0.0987726	FAM135B
ENSOCUG00000004035	2	1.8583	2.14284	1.85836	6.39924	7.1244	8.2511	8.80382	4.91091	4.4949	6.34581	6.43661	5.65576
ENSOCUG00000004037	2	0.336932	0.229273	0.207216	0.715852	0.480426	0.728786	0.560827	0.820093	0.499955	0.616712	0.941767	0.581408	SYCP2
ENSOCUG00000004074	2	0.698769	3.00597	1.36846	3.30003	3.1869	4.64947	5.95238	2.66926	3.79638	5.34328	7.17931	6.46466	ACTC1
ENSOCUG00000004079	2	0.372062	0.35991	0.589852	0.810453	1.41029	1.65792	1.43678	1.22558	1.23658	1.20915	1.13694	1.20326	IRX6
ENSOCUG00000004160	2	2.05463	5.12134	2.48087	5.08517	6.35556	7.00994	6.58117	6.3108	6.13498	7.90227	7.39281	6.86432	FAM17A
ENSOCUG00000004165	2	11.0087	11.7262	9.78001	20.0579	24.2804	20.1645	23.5809	17.7488	21.0733	21.649	22.0613	24.1467	IRF1
ENSOCUG00000004252	2	0.697523	0.925359	0.414684	1.55815	1.80269	1.63948	1.7797	1.47706	1.75177	1.64616	1.8991	2.28973	FAM131C
ENSOCUG00000004364	2	0.0734352	0.404909	0.141888	10.3775	3.86216	7.08893	13.6031	12.786	11.378	15.7213	19.0978	12.5152
ENSOCUG00000004461	2	0	0.140828	0	2.28401	0.627077	1.74656	2.83048	3.6347	2.48294	2.21228	3.57066	1.85849	CDH9
ENSOCUG00000004476	2	7.25619	8.96897	7.98866	15.0533	15.4539	17.4105	18.4537	14.4803	14.4558	16.0849	16.6948	15.1642	DDX25
ENSOCUG00000004491	2	2.31663	2.46737	3.22307	17.045	15.0728	19.3157	20.4745	14.9137	14.8266	20.2577	20.5921	15.9638	CCDC73
ENSOCUG00000004513	2	0.895652	0.924158	0.502892	2.90323	3.93505	5.8075	4.17928	3.93372	4.20402	3.74622	3.31311	2.94738	DACH2
ENSOCUG00000004624	2	0.0922946	0.053568	0	0.861611	1.09723	0.806717	1.42564	1.34637	1.35615	0.449915	0.489845	0.235644	SYT1
ENSOCUG00000004635	2	0.193829	0.362496	0.230466	4.85544	6.90176	7.31937	8.73254	4.02341	5.32316	18.1975	19.2029	16.0231	AQP2
ENSOCUG00000004825	2	0.827178	0.828402	0.713542	2.68002	2.17969	4.11957	5.05762	4.16725	4.13654	3.97081	3.58413	2.15334	DRD1
ENSOCUG00000004905	2	1.16033	1.19075	1.11972	8.00641	5.18049	11.9146	16.2511	3.62431	4.57125	7.03172	8.3734	7.36768	PLEKHD1
ENSOCUG00000004939	2	1.0849	0.922349	0.454214	4.13681	7.01354	6.67801	8.45283	4.73136	3.81691	6.10802	5.70641	2.29398	ATP2B2
ENSOCUG00000004943	2	0.0240777	0	0	0.224776	0.0995627	0.173316	0.04649	0.0906426	0.0505414	0.104332	0.232346	0.0245898	TRPC7
ENSOCUG00000004978	2	1.59446	2.57198	2.11744	6.84325	9.86841	9.11368	11.9547	4.32648	6.17227	10.2289	10.6505	7.1691	CRTAC1
ENSOCUG00000004994	2	0.372705	0.173055	0.221577	0.626286	0.809108	0.958145	1.15141	1.2277	1.21263	0.968988	0.899135	0.494822	FAM227A
ENSOCUG00000005073	2	5.36067	4.32883	4.79431	9.72599	7.05962	10.0662	6.63787	7.17294	7.41202	8.5087	9.80613	9.73544	USP18
ENSOCUG00000005085	2	0.0855062	0.0567177	0.0145241	10.0122	18.2848	20.8764	20.9439	14.2899	12.3461	14.0264	10.8798	9.88019	CASR
ENSOCUG00000005228	2	7.16512	7.07391	4.92755	30.2576	29.7153	45.0455	41.7751	37.6477	31.5838	33.7115	30.1423	28.8645	NKD1
ENSOCUG00000005244	2	3.35284	3.78609	3.4442	36.4744	32.8685	39.6846	36.1563	30.4604	34.3279	26.734	26.8299	26.4615	LRRTM1
ENSOCUG00000005249	2	4.87511	3.66552	4.05103	16.1875	23.4805	20.5938	23.9471	18.3397	15.3791	5.37114	6.14779	4.52618	DDAH1
ENSOCUG00000005253	2	3.50414	2.98357	2.58441	14.9599	12.0891	18.4163	20.7047	16.4974	14.7284	20.296	18.3268	16.0956	GNAL
ENSOCUG00000005293	2	2.81836	3.57648	3.40173	10.0869	7.26546	8.78209	10.116	9.6679	8.91872	8.90546	10.9266	12.2165	DYNC2LI1
ENSOCUG00000005322	2	0	0.0609483	0.0936444	0.0980318	0.352807	0.188971	0.582928	0.222368	0.385747	0.255951	0.126667	0.402165	ADGRG7
ENSOCUG00000005346	2	0.209745	0.27269	0.259366	0.759729	0.529058	0.836854	0.615574	0.647475	1.13591	0.763436	0.599105	0.479822	TDRD15
ENSOCUG00000005399	2	0.83714	0.791802	0.884778	2.05508	2.11544	1.84922	2.69397	1.51738	2.31044	2.38471	2.3038	2.97648	EPO
ENSOCUG00000005558	2	1.94517	0.954709	0.900301	1.23091	2.32125	1.93312	4.54981	1.89212	2.74033	1.92332	1.15899	0.679958	PXDNL
ENSOCUG00000005661	2	1.02683	0.721883	0.842604	2.1737	1.211	1.96308	2.58301	2.57252	1.62415	2.42835	1.84218	1.13729	XKRX
ENSOCUG00000005671	2	1.66839	2.06367	1.5935	4.97893	3.98665	4.5	4.83207	4.45318	3.27246	4.79981	4.64515	4.13399	SLC9B1
ENSOCUG00000005835	2	0.229211	0.202213	0.267085	1.14692	1.39801	1.9846	2.76605	2.17878	1.85718	2.12048	2.29147	1.25002	STXBP5L
ENSOCUG00000005879	2	0.315031	0.152371	0.405793	0.686223	0.787031	0.998849	0.887064	1.03772	1.07458	0.853169	0.658666	1.04563	P2RY14
ENSOCUG00000005882	2	68.6028	69.9305	55.9981	120.261	116.415	129.121	139.1	113.67	104.725	133.364	138.1	118.681	WT1
ENSOCUG00000005927	2	0.349079	0.32417	0.0622592	2.15081	1.26303	1.4538	1.70188	2.02049	1.96011	2.66597	2.40852	1.9073	ACSM5
ENSOCUG00000005937	2	34.4577	43.9842	45.4378	111.182	109.847	145.392	138.06	137.751	147.82	166.99	167.72	172.066	SCD5
ENSOCUG00000006069	2	0.112248	0.260596	0.177953	2.41013	2.47547	3.65516	2.78139	2.25369	2.00276	1.54022	2.38298	2.36913	DMRTA1
ENSOCUG00000006104	2	0.903183	1.19819	0.805426	1.35508	1.13375	1.72483	2.11759	2.36794	1.45576	1.81703	1.89875	1.94362	CFAP3
ENSOCUG00000006208	2	0.537496	0.477695	0.179745	0.768345	0.694556	1.13134	1.20808	1.07496	1.11944	1.41016	1.45067	1.14074	CIITA
ENSOCUG00000006273	2	0.884271	1.9345	0.727903	5.08004	2.67207	4.19681	5.08931	5.56954	4.49765	6.44751	6.62954	5.21008	ASPHD2
ENSOCUG00000006355	2	1.26548	0.998009	0.884432	2.27259	1.58783	2.21522	1.43622	1.82742	1.81485	1.40227	1.76184	1.28253	DDX6
ENSOCUG00000006437	2	4.64418	5.88109	9.78904	10.6812	16.0615	14.848	14.8366	26.3046	10.5462	19.1634	18.0892	21.8177	RUNDC3A
ENSOCUG00000006493	2	237.398	286.466	396.905	714.536	397.796	498.846	709.145	654.573	519.042	512.708	741.205	884.167
ENSOCUG00000006562	2	0.563794	0.590293	0.519201	0.985572	0.999954	1.58581	1.85701	1.87795	1.60115	1.85619	1.86684	1.41688	LANCL3
ENSOCUG00000006696	2	0.173156	0.134001	0.343144	21.8496	11.0385	16.6486	15.2959	22.4893	23.1411	32.4196	24.0893	29.1491
ENSOCUG00000006705	2	4.7843	5.35141	4.19078	12.8486	10.8338	14.277	18.1778	14.2524	12.2088	15.3015	16.2428	13.2074	GPR156
ENSOCUG00000006829	2	0.803812	0.805833	0.629925	1.97831	2.26624	2.01007	2.43386	2.09758	1.49554	1.46445	2.327	1.94033	ARHGEF37
ENSOCUG00000006860	2	1.27609	0.969895	1.44504	5.46007	3.4864	4.8896	6.46779	3.61727	4.14551	4.45978	7.15389	3.83213	GLDN
ENSOCUG00000006913	2	0.609594	0.967081	0.604015	2.40912	2.43668	3.34322	5.23776	3.05983	2.02603	1.12262	0.882372	0.456544	TTLL8
ENSOCUG00000006971	2	0.275998	0.384457	0.229717	0.850267	0.599167	0.737914	1.06581	0.831217	1.04283	0.56807	0.825635	0.845607	KATNAL2
ENSOCUG00000006983	2	0.160294	0.124047	0.063531	1.84558	1.60183	1.86811	2.26968	1.50861	1.68237	2.37314	2.32022	1.80074	CPA2
ENSOCUG00000007001	2	0.118083	0	0.0468009	1.65353	2.97037	4.24992	4.25597	1.667	3.13965	5.32987	6.3431	5.78853	CPA1
ENSOCUG00000007042	2	1.0885	0.569686	0.830411	6.12633	5.61975	6.59298	10.8609	7.68031	6.10837	5.46635	6.4723	2.88515	DCX
ENSOCUG00000007240	2	0.0941314	0.145691	0.149232	1.87468	1.55696	2.35539	3.7865	1.86042	1.41607	1.25764	1.66531	0.384534	ST8SIA6
ENSOCUG00000007266	2	0.167284	0.0919819	0.0837489	0.172606	0.254848	0.153913	0.526996	0.39774	0.175573	0.171678	0.076465	0.00899169	SCN1A
ENSOCUG00000007278	2	0.627555	0.412342	0.394206	0.983788	0.75891	1.25412	1.93187	1.43755	0.546804	0.666993	0.662711	0.362776
ENSOCUG00000007281	2	0.448745	0.548322	0.280824	1.00321	0.891171	0.98362	1.39088	1.03361	0.805623	0.933858	1.32189	0.566833	HCN4
ENSOCUG00000007311	2	0	0	0.288704	0.566682	0.251007	1.74779	4.45382	0.571297	2.03872	0.526061	1.05438	1.23987	NPPA
ENSOCUG00000007332	2	1.65215	2.10865	1.29008	3.82902	4.63946	5.12214	4.62632	3.2336	3.05392	4.80826	5.13188	3.97898	CFAP251
ENSOCUG00000007344	2	13.8116	13.6489	14.1314	29.5327	25.7364	35.58	32.3092	37.8247	35.2829	38.6758	32.5471	26.5751
ENSOCUG00000007358	2	18.751	16.6001	18.774	47.6573	38.4638	48.9788	53.8496	58.0087	51.5529	37.2399	44.7308	36.5284	STK26
ENSOCUG00000007540	2	0.490645	0.447499	0.375034	1.734	2.13754	2.66684	4.16159	1.88006	1.58165	2.96125	2.67169	1.36008
ENSOCUG00000007599	2	3.46597	3.32717	2.59011	11.1312	8.74325	11.4904	13.6909	8.55753	11.4222	16.1363	10.0338	10.6281	NR6A1
ENSOCUG00000007643	2	0.168396	0.213246	0.200227	0.614531	0.522247	0.550978	0.738967	0.633944	0.77123	0.331674	0.54659	0.484666	NIPAL1
ENSOCUG00000007830	2	0.368817	0.154601	0.109633	3.60566	3.86565	4.37202	5.31126	3.74108	3.66661	5.29381	5.19024	3.58875	IL31RA
ENSOCUG00000007855	2	20.9634	25.5126	19.4086	53.528	57.7756	70.7204	70.3944	61.5673	56.6575	68.8234	67.5243	60.2717	PXYLP1
ENSOCUG00000007885	2	5.20023	6.18318	7.04195	24.2395	18.8527	22.3369	27.4727	22.8565	18.97	21.8487	24.7945	15.8588	KCNAB1
ENSOCUG00000007900	2	30.613	35.6683	24.7639	60.3534	57.5126	73.9322	77.5354	45.9962	53.9889	68.8904	81.9056	68.2684	RCOR2
ENSOCUG00000007916	2	1.00678	1.48853	0.869462	3.1659	3.68107	4.08668	3.39677	2.25413	2.59162	3.52446	2.62824	2.96554	GCNT1
ENSOCUG00000008001	2	3.95398	3.9896	7.1967	10.1367	9.49556	16.3889	17.7355	17.0893	11.0451	16.5401	25.7401	14.972	SLC38A5
ENSOCUG00000008028	2	0.207996	0.281684	0.57706	1.10032	0.895914	2.06756	2.44311	2.0228	1.27343	1.87766	2.70963	2.83227	NAP1L5
ENSOCUG00000008043	2	2.81674	2.92808	4.31892	20.1573	15.1503	22.1604	28.3947	20.274	18.8674	20.2208	28.3414	17.7065	ERC2
ENSOCUG00000008068	2	2.24057	2.24536	2.52992	10.2026	7.33194	9.86251	14.099	14.3817	10.1846	10.6167	10.9661	7.39148	BCHE
ENSOCUG00000008102	2	35.7547	28.8984	26.7138	56.4376	51.2173	73.6817	94.5938	80.7322	70.214	77.1542	92.3763	64.2417	MTSS1
ENSOCUG00000008137	2	6.98357	4.99173	6.72878	13.4966	10.9091	14.0442	14.4224	21.6037	14.9571	15.0186	17.9265	11.9981	MLLT3
ENSOCUG00000008140	2	1.47625	1.41027	1.18419	3.91025	5.06753	4.69217	5.18937	4.84619	4.13668	4.72108	4.15781	3.1668	TTLL7
ENSOCUG00000008177	2	0.0246638	0.0486709	0.0410561	0.343069	0.563475	0.694924	0.835762	0.54781	0.520306	0.988562	0.792546	0.571778	MGAM
ENSOCUG00000008298	2	4.27072	4.79464	5.0965	14.6963	11.3757	16.8453	18.8847	16.811	14.6903	17.1717	20.1697	16.6663	FAXC
ENSOCUG00000008312	2	0.374336	0.790057	0.242778	3.36752	4.15119	3.32444	4.041	1.5053	2.85734	2.72799	1.9375	3.44068	STMN2
ENSOCUG00000008322	2	1.26971	2.20236	1.4403	3.05189	3.6511	2.98652	3.11382	2.33503	2.42017	3.25683	3.01383	2.93625	ASB9
ENSOCUG00000008378	2	2.50723	2.36067	2.99219	14.6678	14.2266	20.6927	21.9461	21.4643	17.9232	19.6058	19.5168	15.6669	DPP1
ENSOCUG00000008464	2	0.0920915	0.173713	0.136873	1.98809	1.36851	2.11889	2.21155	2.61098	1.90893	1.38419	1.58849	1.42251	PRKG2
ENSOCUG00000008489	2	4.32689	5.36987	4.62317	15.5059	15.8101	18.4128	21.4638	15.8761	12.8077	18.101	19.7994	19.0808	SLC3A8
ENSOCUG00000008597	2	0.512371	1.2267	0.533066	5.11206	3.90633	4.59372	3.89538	2.86316	4.72219	6.62582	6.25762	6.09936	DDX4
ENSOCUG00000008610	2	6.74968	6.14727	6.61389	15.8151	12.328	15.075	20.3343	19.1703	18.0883	12.4994	16.0645	9.87668	DPYD
ENSOCUG00000008628	2	0.628979	0.619915	0.352768	4.354	2.73582	3.70988	7.37838	6.39989	4.89503	7.23787	7.5812	5.18734	PNPLA1
ENSOCUG00000008674	2	0.850922	0.581032	0.535639	1.12147	1.3626	1.59562	1.77185	1.27193	1.43594	1.8978	1.99646	1.90844	MCF2L2
ENSOCUG00000008691	2	10.5684	8.23163	8.74049	20.7154	18.2187	23.5825	23.1081	20.7008	23.8802	25.5464	22.3946	22.36	B3GNT5
ENSOCUG00000008722	2	0.377773	0.240285	0.203053	0.95172	0.700811	0.867404	1.08413	1.01305	1.08628	1.27255	1.01373	0.623635	NEXMIF
ENSOCUG00000008742	2	16.7971	7.9437	12.2052	27.0059	24.4386	39.9831	24.3243	37.1794	16.9764	21.5657	27.3151	42.2506
ENSOCUG00000008754	2	4.66115	7.43338	3.67754	22.2857	28.3708	28.49	28.0091	14.7184	18.8369	36.4308	31.6117	20.8652	CAMKV
ENSOCUG00000008784	2	1.28937	0.954276	0.617349	8.78931	6.76293	10.4557	11.8881	12.819	10.3174	17.839	16.3085	10.7818	NALCN
ENSOCUG00000008813	2	0.0253617	0.11776	0.060311	0.37882	0.314616	0.339037	0.220361	0.286429	0.106473	0.109895	0.562893	0.155407	ITGBL1
ENSOCUG00000008832	2	1.79733	2.37413	1.32645	3.63061	3.55587	4.11071	4.30802	3.73309	2.86211	3.70941	4.59017	4.22496	CCDC113
ENSOCUG00000008908	2	0.430799	0.105279	0.242634	1.37584	0.937568	2.37819	1.59793	3.00883	1.07087	0.810544	0.196917	0.0926236	KCNA2
ENSOCUG00000008998	2	1.38999	1.79791	1.01525	2.07619	1.25218	2.34822	3.10559	2.07441	1.97989	2.96849	2.72096	3.06219	KCNJ14
ENSOCUG00000009052	2	0.623034	0.821842	1.04385	1.83742	1.71264	2.18412	1.94116	1.90569	1.84282	1.73332	1.5577	1.0412	EYA1
ENSOCUG00000009092	2	0.385742	0.610597	0.250175	1.83327	2.4651	1.44241	1.99743	1.35315	1.91386	2.31726	1.2859	1.86229	PSMA8
ENSOCUG00000009185	2	0.99483	0.315599	0.477557	1.36712	0.970931	1.26445	1.92085	1.73299	2.17904	2.24238	2.07502	1.41986	GALNT5
ENSOCUG00000009197	2	31.944	40.6077	35.8697	92.0983	89.4905	83.4187	72.8506	78.2539	67.9945	108.705	121.844	96.3443	DCAF13
ENSOCUG00000009203	2	0.0662663	0.86153	0.157584	3.09313	1.7674	2.49402	3.87686	5.00178	5.16059	4.55118	4.38669	3.66803	LGR5
ENSOCUG00000009206	2	1.28636	1.80064	1.75443	3.77922	1.95558	2.64556	3.32384	4.55776	2.62077	3.19683	3.57791	5.44808
ENSOCUG00000009258	2	1.23289	1.29175	0.847195	2.78024	2.81388	3.50704	4.15044	2.66726	2.50394	3.26955	2.46442	2.74716
ENSOCUG00000009285	2	0.369559	0.122568	0.0627733	1.13357	1.14611	0.868625	1.37615	0.596245	0.664921	1.42978	0.917019	1.99493	C11orf53
ENSOCUG00000009346	2	0.91396	1.08058	1.10684	8.07402	6.70998	8.87626	9.6732	9.2787	8.34899	15.3187	15.7364	10.5267	CHRM3
ENSOCUG00000009358	2	0.522071	0.762415	0.240291	1.19486	1.6191	1.40275	2.84525	1.20459	2.17408	2.09801	1.3326	2.1327	ZIC3
ENSOCUG00000009417	2	7.12255	6.83439	8.93416	16.757	12.6853	17.1793	17.3375	23.5068	21.1029	16.7315	14.6694	11.7326	PDE5A
ENSOCUG00000009428	2	1.75585	2.83298	1.90392	11.9587	12.4663	14.9669	15.1069	12.9291	11.741	11.6518	13.5656	12.169	RAB6B
ENSOCUG00000009437	2	0.0824436	0.111651	0.0816892	0.205239	0.355114	0.42389	0.331635	0.478482	0.331693	0.520974	0.344746	0.238559	TMC1
ENSOCUG00000009466	2	0.153492	0.0485931	0.132731	0.390796	0.966475	0.846588	0.821748	0.604101	0.263614	0.71045	0.632866	0.313514	HEPHL1
ENSOCUG00000009469	2	4.75815	4.07207	3.46108	11.7058	7.31071	10.8219	13.7088	12.0997	9.73323	8.69177	10.0834	6.55537
ENSOCUG00000009581	2	0.141661	0.255796	0.205867	7.92009	4.44213	6.45811	8.26647	8.1031	7.25226	10.6909	8.80956	8.5036	TACR3
ENSOCUG00000009657	2	3.6442	3.34628	3.62163	46.8666	22.3223	52.5193	61.4367	63.3731	74.7255	47.3134	55.6356	109.374	SDR16C5
ENSOCUG00000009754	2	1.22941	1.59177	0.730893	3.13412	4.15492	3.01467	3.33242	2.80363	3.37469	3.22704	3.37655	3.52521	DNAAF11
ENSOCUG00000009788	2	0.196047	0.401599	0.315376	2.45461	1.07294	2.25316	2.43821	3.27776	2.19075	1.8614	2.17003	2.17884	WDR49
ENSOCUG00000009794	2	0.582501	0.377397	0.434891	4.85617	2.54872	4.80588	5.32277	4.19451	4.46437	4.21164	6.39229	3.0713	HTR1A
ENSOCUG00000009797	2	0.167725	0.157611	0.161442	0.46228	0.520165	0.550275	0.825045	0.669	0.620316	0.735426	0.655115	0.579132	ABCA4
ENSOCUG00000009909	2	0.92073	0.712526	0.364922	1.43257	1.16333	2.1566	2.46914	1.68495	0.966351	1.60694	2.76419	1.77615	PHYHIP
ENSOCUG00000009976	2	0.0807281	0.0156183	0.0799893	0.301453	0.27818	0.373562	0.610501	0.506513	0.169456	0.495557	0.259671	0.371003	HTR2A
ENSOCUG00000010012	2	3.7199	5.70291	2.47958	17.3021	15.4306	16.7885	23.4066	15.8605	18.3182	19.3548	22.7162	13.0663
ENSOCUG00000010111	2	5.21204	5.06014	5.01411	16.2336	19.005	22.9002	20.4245	12.5308	15.7644	15.1675	14.4713	15.8961	P4HA3
ENSOCUG00000010149	2	4.12335	2.5773	3.12482	6.26045	5.15257	5.73113	8.66142	6.35408	4.13743	6.13565	6.82108	6.52482	IL12A
ENSOCUG00000010160	2	0.23323	0.433176	0.277315	0.667708	0.835832	1.07126	0.93068	0.556077	0.391658	0.774806	0.630177	0.460503	DNAI3
ENSOCUG00000010196	2	13.139	14.8078	15.2864	51.3148	58.0617	79.664	76.3167	56.8043	55.3522	73.5807	69.317	62.9141	REEP1
ENSOCUG00000010266	2	0.106566	0.164937	0.0844727	0.806927	0.697707	0.803612	0.948788	0.724348	0.683505	0.872222	0.845528	0.713459	MYO3B
ENSOCUG00000010292	2	3.55171	4.53976	3.39267	12.0519	9.3441	11.0184	11.5773	10.1407	10.0522	11.4344	14.21	12.6139	EFHC2
ENSOCUG00000010300	2	2.0498	2.63297	1.43838	6.7289	8.09394	9.0188	11.3869	6.51489	5.07863	11.3938	11.5439	9.02565	LGALS12
ENSOCUG00000010436	2	33.2335	30.0028	33.7977	57.4722	55.6296	72.2853	88.1437	66.2025	66.1411	90.2345	86.4403	67.38	LEF1
ENSOCUG00000010456	2	8.31766	8.52267	6.42939	15.8386	18.8381	15.9841	16.97	16.2944	13.624	16.6056	15.8932	15.4693	RASGEF1B
ENSOCUG00000010458	2	6.05744	6.36364	3.9368	14.269	23.9032	24.0228	23.7481	16.2446	15.3357	25.0835	22.0928	19.6121	NECTIN1
ENSOCUG00000010551	2	3.0687	7.2654	5.56342	10.4947	9.17144	12.2162	13.0529	6.60545	11.3523	14.1857	13.3109	13.715	SLC7A3
ENSOCUG00000010649	2	0.476605	0.655699	0.566692	7.61328	9.96345	11.5627	13.1391	13.2407	13.3948	13.94	15.7564	13.2502	MKX
ENSOCUG00000010659	2	0.700611	0.665406	0.378655	1.12973	0.872413	0.949683	1.52186	1.18388	0.852309	1.63866	1.21387	0.699252	ADAM23
ENSOCUG00000010696	2	1.53254	1.60358	1.5399	4.27192	5.57846	6.81423	8.25206	4.22545	4.00985	12.65	10.8312	7.95793	NTRK1
ENSOCUG00000010709	2	3.04743	3.41956	2.53642	5.78466	7.77081	6.63304	7.01187	5.44936	4.95756	6.4374	6.02848	5.55018	SPAG4
ENSOCUG00000010747	2	6.39943	7.0285	6.70181	10.6386	17.1494	12.5285	16.4433	12.3004	13.9238	17.8109	17.8847	13.9257	ZNF385A
ENSOCUG00000010749	2	0.906753	1.03973	0.473333	3.38598	3.29223	3.79794	6.57614	3.88188	3.20322	4.68375	4.82318	1.85208	PLEKHG4B
ENSOCUG00000010754	2	2.14708	1.89945	1.88939	3.79688	3.40271	5.08688	4.31003	4.58446	4.52679	4.70303	3.35885	3.62239	NIPA1
ENSOCUG00000010770	2	0.331561	0.0615804	0.110385	1.68382	0.479858	0.968294	2.49674	2.59623	1.61467	1.566	1.9069	1.70661	PAK5
ENSOCUG00000010773	2	2.51378	1.79489	1.46221	4.79475	5.97318	4.90026	4.87115	3.56578	3.90056	8.79631	7.41688	6.10414	IRAG1
ENSOCUG00000011017	2	2.57035	2.98368	3.02024	9.11825	8.87798	9.26651	12.816	8.39563	8.75962	9.46702	9.01679	11.2104	ADORA1
ENSOCUG00000011021	2	0.342679	0.227305	0.174622	4.68434	9.56475	7.04765	10.4684	5.80521	8.27215	22.8034	19.4629	22.6979	MYBPH
ENSOCUG00000011107	2	1.88108	2.49551	2.23664	3.36879	3.25422	4.77664	5.29983	2.56523	4.10973	5.48942	4.07496	4.82233	TMEM163
ENSOCUG00000011124	2	1.27981	1.45908	1.05977	3.20024	4.22894	4.77067	6.13362	3.74252	3.88575	3.81258	4.80765	4.36455	FGF18
ENSOCUG00000011141	2	1.64991	3.25822	1.33975	7.92673	7.32169	9.228	8.35276	4.71524	6.56764	9.84115	5.69868	5.57901	RET
ENSOCUG00000011218	2	1.05171	1.4017	0.941741	2.52122	2.24156	3.47146	4.57531	1.93076	2.1804	3.98053	3.69619	2.83771	CFAP92
ENSOCUG00000011278	2	8.40999	10.3329	10.0159	20.0993	18.5876	21.5782	22.6572	21.7535	20.0177	19.6554	25.0448	25.8363
ENSOCUG00000011332	2	5.46691	5.68135	4.79819	13.1854	9.48493	10.977	15.9125	12.4587	12.5916	14.5471	16.8657	13.6725	PACSIN1
ENSOCUG00000011392	2	1.18678	1.71437	1.1916	2.1912	2.45371	3.06452	2.62247	2.48208	2.10365	3.45689	2.82488	3.01659	ENKUR
ENSOCUG00000011657	2	0.839207	0.974157	0.769757	7.14047	4.51123	5.37507	9.67593	7.71765	8.17875	9.19489	8.16763	7.68903	DRD2
ENSOCUG00000011766	2	0.657965	0.687393	0.414637	1.91643	1.21072	1.60353	2.18513	1.83296	1.65045	2.25946	2.27938	1.18265	B3GALT5
ENSOCUG00000011843	2	37.9405	58.4332	47.5097	143.873	179.779	192.002	173.661	110.602	137.647	264.563	208.969	297.357	HSD11B2
ENSOCUG00000012003	2	1.30146	1.67407	1.67293	4.03896	4.47256	4.59366	4.27873	3.74081	3.65483	4.19144	3.97132	3.98743	CFAP21
ENSOCUG00000012022	2	22.8998	23.164	22.8663	49.8973	45.7645	57.6187	58.2873	50.8611	50.0718	65.4391	62.4521	52.6205	EOGT
ENSOCUG00000012088	2	21.3221	20.943	14.9831	65.1491	43.7533	57.653	67.6245	72.6826	70.6415	59.023	68.2889	82.2612	EMX2
ENSOCUG00000012115	2	17.2484	21.0898	13.4142	62.6193	51.3262	72.8127	78.3871	73.6268	63.8298	61.051	67.0214	58.6131	AXIN2
ENSOCUG00000012185	2	1.90241	2.16836	1.71953	2.53138	3.92439	3.84173	3.76465	4.04268	3.23442	4.68119	4.07031	2.97145	CRACD
ENSOCUG00000012217	2	31.8902	35.8447	29.4529	175.833	151.901	196.326	248.943	182.895	186.673	220.602	215.293	141.417	APCDD1
ENSOCUG00000012248	2	0.158466	0.367896	0.134585	0.443804	0.725472	1.44329	1.66098	0.98006	1.14046	1.3733	1.24518	1.36405
ENSOCUG00000012272	2	9.82828	6.77439	4.32367	34.2673	22.121	25.7567	40.1753	43.2458	32.8273	43.7993	41.7645	34.8385	PRRX1
ENSOCUG00000012344	2	1.10338	0.919558	0.706431	22.0538	15.9689	19.2304	33.3224	25.4819	20.3996	17.6533	22.387	15.2847	KHDRBS2
ENSOCUG00000012413	2	1.5414	2.7986	0.892881	5.49759	3.79976	5.73055	7.17338	5.17039	4.35555	4.19584	7.05574	3.99602	CATIP
ENSOCUG00000012442	2	34.0931	35.6691	30.0767	59.8176	72.4599	68.9552	77.5782	53.9704	52.3154	72.9189	73.6155	58.5324	TBC1D1
ENSOCUG00000012443	2	2.13757	2.28541	1.87277	3.29523	3.37277	4.33835	4.42598	5.41325	4.32461	6.55069	4.88539	4.16501	FAM189A1
ENSOCUG00000012458	2	0.139722	0.104265	0.0830663	0.908401	0.39721	0.610634	1.35372	2.0946	1.33028	1.40007	1.20384	0.784819	FUT9
ENSOCUG00000012479	2	0.0466713	0.0541763	0.055493	0.784254	0.434224	0.719891	1.35172	1.01026	1.32256	0.758372	1.08089	0.953279	CDX1
ENSOCUG00000012521	2	5.94399	5.88885	7.14518	32.7857	17.9614	28.2554	35.9861	30.3069	26.4622	28.9874	37.6927	21.5689	RADX
ENSOCUG00000012530	2	20.5077	13.0716	11.2542	25.6779	39.2428	29.786	29.5519	33.2156	31.9158	34.7596	31.2714	17.1733	NPNT
ENSOCUG00000012589	2	7.27199	8.96191	8.43037	18.4766	14.6717	15.554	21.7987	16.1291	15.837	15.3482	15.6721	15.1504	SMPDL3B
ENSOCUG00000012608	2	0.0212424	0.221925	0.0252576	3.84716	2.3936	3.3858	4.34765	3.91848	3.09899	3.24462	3.21827	3.25414	PTGER2
ENSOCUG00000012713	2	4.12785	2.35329	3.83354	9.3032	6.53972	8.01224	12.0025	14.1834	13.5611	10.7954	13.8355	11.3997
ENSOCUG00000012937	2	29.9541	26.8333	32.1138	45.1905	56.9925	61.6795	72.6071	60.0754	66.6781	68.3589	66.7994	60.0558	PRKACB
ENSOCUG00000012993	2	10.3273	8.02205	8.98333	18.6224	17.7238	22.3174	22.714	22.6472	17.7744	20.2635	18.8374	18.4136	PCGF5
ENSOCUG00000013016	2	1.75369	2.01992	1.13149	9.696	8.19322	11.1277	13.6625	10.5938	9.845	10.7358	11.8722	9.24654	MAPK4
ENSOCUG00000013057	2	0.122005	0.47208	0.0483554	0.683382	1.38737	1.12914	2.39497	0.880322	1.0244	1.23355	0.627908	1.4952	GBX2
ENSOCUG00000013186	2	0.622957	0.553648	0.277765	4.92507	6.36948	7.36685	7.33912	5.6156	5.48599	11.9468	9.90008	13.6188
ENSOCUG00000013224	2	0	0.245135	0.125547	1.28143	0.764075	1.52009	1.9368	1.19249	1.1082	1.83011	1.32458	1.18618	LHFPL4
ENSOCUG00000013284	2	0	0.0857776	0	2.69038	4.27784	1.99466	3.08543	2.78184	1.29907	0.280172	0.463498	0.301867	ST18
ENSOCUG00000013485	2	1.42172	2.98632	2.09293	5.43534	3.1494	4.17706	6.66667	6.37164	2.48693	4.10699	6.20636	2.69649
ENSOCUG00000013507	2	0.0616781	0.143193	0	11.3719	14.0911	14.0168	18.2506	12.3643	10.6164	18.1736	19.3137	9.54299	NMUR2
ENSOCUG00000013530	2	1.22578	1.20869	0.971649	9.99125	6.1042	11.6561	13.9462	9.81212	9.65577	16.9624	19.0147	14.3357	CCDC17
ENSOCUG00000013544	2	0.796554	0.824683	0.332771	3.6176	4.7404	5.57879	4.21915	2.37059	2.71142	4.8975	4.3419	2.83625	ATP6VA4
ENSOCUG00000013668	2	6.65065	10.6456	8.86501	28.3475	17.7127	24.9442	26.5612	23.4392	23.402	27.3583	32.3929	28.2409	PLPPR1
ENSOCUG00000013731	2	2.24409	2.7884	1.67863	14.5073	11.4686	21.0612	25.5706	26.6333	22.3475	27.2772	25.1118	24.091	RUNX1
ENSOCUG00000013748	2	0.465329	0.660191	0.922141	1.52042	1.38967	1.3026	1.29779	1.43548	1.27523	0.980161	1.92087	1.16166	GCKR
ENSOCUG00000013774	2	9.32461	7.23642	5.24081	14.4754	16.8464	17.1909	19.6487	14.8578	13.9888	18.1479	18.0301	10.4555	CDH8
ENSOCUG00000013801	2	8.04948	9.02648	9.81055	23.811	20.4015	25.7892	24.2442	22.8446	20.4109	24.8189	24.3537	24.2163	SHCBP1
ENSOCUG00000013856	2	2.00541	1.5741	1.2263	3.47683	4.7978	4.69394	5.42095	3.45122	2.96673	4.73795	4.29427	3.47196	OTUD7A
ENSOCUG00000013864	2	0.0656539	0.114317	0.0390319	0.827426	0.475095	1.3165	1.67966	0.772375	1.17142	0.960144	1.80562	1.84389	PTHLH
ENSOCUG00000013992	2	11.4886	14.2304	11.8687	30.3692	52.5858	60.0554	61.407	37.0137	30.6567	39.1538	36.3981	47.4214	TSPAN15
ENSOCUG00000014006	2	6.49348	8.31743	6.65592	14.4233	14.8143	14.2757	16.6451	10.1153	11.7504	17.9495	17.5019	15.0926
ENSOCUG00000014011	2	2.85369	2.31079	2.07964	4.9199	4.54403	4.23609	6.3765	6.28118	5.48295	6.10792	6.60682	3.25519	GRIP1
ENSOCUG00000014066	2	1.40529	2.12684	1.16329	5.66275	3.12615	5.24984	5.77022	4.78809	5.39559	5.87733	5.26983	4.79604	SLC6A15
ENSOCUG00000014076	2	2.35383	2.47588	2.4047	9.37666	7.52833	10.0402	17.195	11.3804	11.5139	13.0255	15.7933	7.85389	DGKB
ENSOCUG00000014105	2	0.563052	0.735293	0.67994	2.34071	1.32783	1.72794	3.46532	5.17495	3.24099	3.56436	3.24303	2.26417	GABRG1
ENSOCUG00000014215	2	0.617443	0.788404	0.832038	11.5858	7.53183	9.94717	13.7299	14.1983	13.1335	13.5557	15.114	15.323	MOGAT2
ENSOCUG00000014250	2	0.401481	0.388368	0.159123	9.82811	8.48521	11.491	10.0129	6.1716	6.57812	29.5019	19.6294	25.968
ENSOCUG00000014251	2	3.13464	3.45264	3.02831	7.66499	6.38891	6.64827	8.16741	6.65463	5.8322	5.2672	5.94664	6.78461	WDR31
ENSOCUG00000014561	2	2.40179	2.09101	1.77521	8.36273	5.48585	6.84201	9.99562	8.47665	6.8811	10.5831	12.3088	6.91116	CDH2
ENSOCUG00000014610	2	4.59152	6.42166	3.81196	12.7836	13.121	11.783	13.6692	8.21427	8.20507	14.111	12.7457	10.1014	ABCC4
ENSOCUG00000014646	2	3.32094	3.99551	3.59904	8.04126	7.47409	7.7904	6.92983	8.00908	8.73187	8.35673	8.22861	8.93822	FEZ1
ENSOCUG00000014705	2	0.0537308	0.62371	0.511095	3.66168	3.66597	5.85673	10.167	4.5006	6.65438	11.0591	12.2364	10.2614	NEU2
ENSOCUG00000014725	2	0	0.00829908	0.0510047	0.393784	1.32296	0.47787	0.752337	0.511378	0.53276	0.557628	0.600219	0.467295
ENSOCUG00000014732	2	0.878716	1.17421	0.716788	2.26065	1.33089	2.50065	3.11711	3.03875	2.50939	2.95531	2.31706	2.46265	RIMKLA
ENSOCUG00000014916	2	20.5899	23.0365	19.902	37.748	51.6289	58.0855	60.3661	44.6855	41.537	60.0426	54.0107	48.7822	SEMA4B
ENSOCUG00000014946	2	6.91202	11.157	6.95414	54.7905	36.0653	43.3614	49.6723	49.4244	53.7005	32.6533	41.9144	79.5709	RASD1
ENSOCUG00000014957	2	9.81325	5.64034	8.01477	13.3192	19.3535	12.9078	15.6825	14.3467	14.2243	14.1654	15.2158	8.41652	FRMD3
ENSOCUG00000015027	2	0.73203	1.32182	1.35395	1.78439	1.009	1.71461	3.53357	1.87547	1.57928	2.51115	2.23692	2.40893	TMEM266
ENSOCUG00000015047	2	0.845057	0.369174	0.583426	1.30635	1.12721	1.42962	1.91238	1.53934	1.44007	2.32304	1.36788	1.36415	CNTN5
ENSOCUG00000015119	2	0.0687687	0.143689	0	0.308154	0.0710907	0.31115	0.531124	0.401273	0.115482	0.476774	0.530885	0.309018	EPHA8
ENSOCUG00000015149	2	0.466429	0.406075	0.242634	0.789221	0.693131	0.86934	1.06946	0.740776	0.458943	0.600013	1.12524	0.982472	TSPEAR
ENSOCUG00000015168	2	1.94733	1.67613	1.24434	5.03329	2.64303	3.67801	5.76785	5.74753	6.75712	5.52491	6.81349	6.15566	PLB1
ENSOCUG00000015188	2	0	0	0	4.84213	2.53606	2.88307	3.65408	2.57272	0.441391	2.27789	0.676378	2.64857
ENSOCUG00000015247	2	3.94618	4.14259	3.42726	7.73627	7.36071	10.3477	11.2055	7.16952	6.14054	9.85999	8.58456	8.04272	ZDHHC14
ENSOCUG00000015299	2	1.37559	1.91132	1.41257	10.682	15.0392	16.3101	20.7855	10.514	13.65	19.9365	17.2163	16.6667	ARHGAP36
ENSOCUG00000015307	2	3.03859	2.49663	2.45323	7.33096	8.95821	9.50247	12.2169	10.7329	12.2841	15.4423	12.863	10.8421	SLC35F1
ENSOCUG00000015312	2	6.74619	4.60737	4.26767	10.1744	15.1667	11.3959	12.1911	15.4476	14.2984	7.9466	6.1813	4.6288	PDGFD
ENSOCUG00000015407	2	0.6149	0.905281	0.481474	1.70811	1.89148	1.60391	1.75195	1.27034	1.63703	1.73839	1.4183	1.22533	GRAMD1C
ENSOCUG00000015423	2	1.98694	2.13072	1.38376	4.19561	2.57243	3.87236	3.94607	4.36335	3.47565	5.20681	3.72517	3.42066	ZDHHC23
ENSOCUG00000015494	2	11.8977	7.95863	6.72479	17.0124	13.0325	17.9988	22.8378	21.4912	18.7924	23.2249	20.3115	13.5478	NIN
ENSOCUG00000015511	2	0.15366	0.0891847	0.0913523	0.771035	0.794242	1.10608	0.982792	0.56039	0.624935	0.187264	0.463373	0.117696	ABHD12B
ENSOCUG00000015550	2	1.24769	0.626305	0.481145	3.14018	2.83238	4.28252	4.07755	3.40378	2.9641	5.15984	4.39299	3.22863	ASTN1
ENSOCUG00000015559	2	1.28976	2.01791	0.906793	3.10958	2.77096	3.43679	4.17939	2.78658	3.02514	4.14292	4.00435	3.64232	DRC1
ENSOCUG00000015699	2	0.564838	0.760573	0.295505	1.96156	3.45675	2.69506	4.86411	1.67984	1.96818	0.930056	0.893897	0.530704	ASIC1
ENSOCUG00000015710	2	3.43746	2.51236	2.42205	4.5164	5.65932	6.28408	7.0059	4.31354	4.944	5.24082	3.31709	1.43024	RIMS4
ENSOCUG00000015935	2	7.16028	9.8406	8.00118	25.2623	26.0186	17.952	29.7314	20.7801	16.689	29.5218	28.0542	27.7585	TCF7
ENSOCUG00000015939	2	64.2831	82.497	52.2288	173.315	109.416	155.847	175.083	138.545	178.504	138.75	197.165	150.833
ENSOCUG00000016027	2	0.768877	1.45034	0.828502	2.96085	4.24742	5.06509	4.22176	3.16587	2.64788	3.5659	3.87207	2.25754	SLC11A1
ENSOCUG00000016029	2	1.41247	1.52387	1.4226	4.60735	6.63085	7.45028	6.25662	5.73963	4.51713	6.10241	6.10949	5.70217	IQCD
ENSOCUG00000016033	2	0.248256	0.230541	0.236145	34.3928	41.7294	37.578	47.7903	43.8318	41.8975	31.0884	32.6284	32.8583	WNT1A
ENSOCUG00000016105	2	0.457256	0.318471	0.299027	1.6221	0.590869	1.08147	1.56712	1.7429	1.12779	1.06498	0.970738	2.24151	COLQ
ENSOCUG00000016177	2	3.43943	4.46474	2.55047	7.23306	7.05377	7.60605	7.49786	5.3428	5.80292	8.35316	7.63724	5.9865	EPB41L4B
ENSOCUG00000016234	2	0	0	0.0365898	0.229824	0.222685	0.158222	0.207962	0.260658	0.161489	0.300023	0.326651	0.282849	SVOP
ENSOCUG00000016262	2	0.490371	0.584609	0.614577	1.74452	1.41118	1.97614	2.13675	1.43443	1.544	2.51248	2.81362	2.47693	ELAVL4
ENSOCUG00000016266	2	3.72742	3.32832	3.61376	9.8235	7.26195	8.81582	9.99281	9.25586	8.75711	8.75903	8.2452	9.86815	BID
ENSOCUG00000016284	2	0.0648037	0.0451347	0.0770528	0.181491	0.187577	0.573092	0.387888	0.195167	0.176838	0.126361	0.175096	0.18531	SHOC1
ENSOCUG00000016317	2	0.247597	0.179632	0.282131	0.51044	0.351941	0.498607	0.697184	0.572854	0.292348	0.614665	0.617228	0.389831	CFAP44
ENSOCUG00000016476	2	0.117281	0.18152	0.0929659	0.693415	0.242481	0.723608	0.377416	0.588684	0.451336	0.296445	0.377246	0.399251	IL18R1
ENSOCUG00000016573	2	4.29664	8.46182	3.82068	19.6099	16.1345	18.6173	18.4181	14.0668	14.8198	19.2743	18.463	15.0581	CPVL
ENSOCUG00000016585	2	2.1863	3.00785	1.38001	6.27422	5.10621	4.49642	5.78487	5.13138	5.77907	6.92972	8.28271	7.93887	SH2D4A
ENSOCUG00000016632	2	14.218	7.95895	8.91042	34.5192	31.4604	40.4478	47.9956	37.8569	38.8591	52.4089	50.9108	45.0109	PDE7B
ENSOCUG00000016660	2	21.7582	51.1094	23.9981	115.752	184.146	154.661	175.012	114.144	112.99	148.564	133.365	136.955	SFRP2
ENSOCUG00000016680	2	0.129998	0.905413	0.103046	0.364076	1.25428	1.15855	1.38052	0.856429	1.63727	1.45518	0.919935	1.23912
ENSOCUG00000016704	2	11.3606	7.2483	6.86845	19.5421	12.0285	20.7339	27.5388	22.1089	21.5662	25.9842	22.4299	8.00639	GXYLT2
ENSOCUG00000016740	2	8.27696	9.71529	7.72472	15.497	18.6186	22.4433	32.0521	18.3649	15.4329	19.5355	21.8419	14.6157	DPF3
ENSOCUG00000016751	2	2.38313	4.14953	3.08361	13.7412	8.55014	9.9466	11.9773	13.1274	6.62086	7.59296	8.99582	14.8177
ENSOCUG00000016758	2	0	0.0363831	0	0.819281	0.680426	1.32145	1.75502	0.53097	0.855295	1.79952	1.90546	2.43273
ENSOCUG00000016779	2	2.36333	6.908	2.74233	12.4402	15.6301	15.6356	18.1428	6.29755	12.9401	15.6385	10.029	17.5349	SOX3
ENSOCUG00000016806	2	2.81741	1.47171	2.11466	5.21104	3.58607	4.58118	8.90793	5.50207	3.54841	4.99774	5.04669	1.54657
ENSOCUG00000016815	2	6.04488	5.49352	4.65767	16.0756	12.0457	14.804	18.4481	10.5174	11.7288	16.5	14.8708	17.3019	ICA1
ENSOCUG00000016822	2	42.4604	42.5929	39.0912	78.0555	53.9159	69.2923	79.5211	81.5829	75.5428	84.6516	93.2289	99.5618	PDCD4
ENSOCUG00000016829	2	2.82386	4.11959	3.26687	10.7585	6.66684	12.557	13.5205	9.33775	7.89005	18.2715	16.7181	15.0042	GPX6
ENSOCUG00000016840	2	3.87585	3.81175	1.21612	4.72387	4.28497	8.19262	6.83401	4.43303	6.72333	7.11437	8.31141	10.1431	HDC
ENSOCUG00000016883	2	0.385677	0.895392	0.300447	2.17269	2.17222	2.35223	3.58216	2.67853	3.36392	3.68814	4.20939	3.0288	FERMT1
ENSOCUG00000016884	2	0.161343	0.218502	0.28776	0.953932	0.333582	0.553038	0.649014	0.556774	0.451566	0.5826	0.518978	0.302087
ENSOCUG00000016966	2	0.212987	0.343104	0.258414	10.1243	6.20095	9.40436	12.8996	12.5671	9.51643	9.20547	8.98875	8.53645	UNC8
ENSOCUG00000016983	2	0.450945	0.465298	0.387243	1.5202	1.11363	1.623	2.39443	1.17891	1.41987	1.43837	1.9582	1.5863	TMPRSS4
ENSOCUG00000016995	2	10.2037	10.6998	11.0937	25.2398	19.595	22.6053	27.3225	24.9107	23.5727	19.0649	23.1059	21.8594
ENSOCUG00000017018	2	2.09988	1.14098	1.30152	4.45593	2.90208	4.45651	5.03221	7.40761	5.13468	5.96117	5.81318	3.46778	RNF152
ENSOCUG00000017203	2	0.942183	0.790823	0.603224	1.90799	2.26267	2.80224	2.46292	1.58248	1.94731	2.92063	2.252	1.52475
ENSOCUG00000017204	2	1.07711	1.39887	1.19195	2.00111	3.51685	2.46746	2.22387	4.12515	2.98851	2.73798	1.97589	1.73172	DAB1
ENSOCUG00000017205	2	0	0.0401921	0.041169	0.48485	0.465315	0.498466	1.43736	0.847252	0.545099	0.637635	0.835298	1.13155	ISX
ENSOCUG00000017309	2	0.534155	0.442893	0.71451	1.62064	1.06494	1.80478	1.22475	1.71463	1.38153	1.12628	1.19658	0.438362	HTR4
ENSOCUG00000017310	2	0.275602	0.31992	0.48062	1.64663	1.10164	3.09857	1.82702	0.985651	0.925624	1.31364	1.31203	0.900685	SLC6A2
ENSOCUG00000017314	2	0.710989	0.180539	0.369853	1.80454	1.46999	2.19336	1.716	2.15381	2.00546	1.37192	2.0154	1.47491	MGAT4C
ENSOCUG00000017411	2	0.248564	0.102043	0.0865017	0.880076	0.385436	0.64524	1.59491	1.65181	1.18669	1.03766	1.00917	0.430309	ADGRV1
ENSOCUG00000017527	2	1.35457	1.12157	1.02494	2.33456	2.09557	2.25985	2.48743	2.309	2.17727	1.71366	2.06583	0.996424	LRRIQ1
ENSOCUG00000017547	2	1.71606	1.67936	0.924139	3.92243	2.71271	5.07237	6.90173	4.53377	4.77328	5.74365	6.4308	3.54441
ENSOCUG00000017595	2	0.397825	0.65238	0.247773	0.966785	0.829043	1.01948	1.16439	1.10541	1.15982	1.48441	1.29793	1.23821
ENSOCUG00000017667	2	57.6413	54.5006	48.3212	134.687	169.995	219.561	200.51	141.391	110.577	254.397	243.798	171.67	ATP1A2
ENSOCUG00000017691	2	0.489288	0.591633	0.573692	1.33859	1.64388	1.57931	2.54553	1.71405	1.04846	1.16314	0.609866	0.610738	UNC5D
ENSOCUG00000017694	2	0.277106	0.321666	0.402703	0.833559	1.62329	1.8047	1.81321	1.13012	1.51881	1.46757	1.45586	1.32067	KRT23
ENSOCUG00000017719	2	1.08936	0.963452	1.17191	2.37291	1.76965	1.60029	2.95473	2.45733	2.21407	2.36016	2.73648	3.30226
ENSOCUG00000017803	2	0.118261	0.0549111	0.154676	0.220803	0.452339	0.304023	0.319679	0.300512	0.285477	0.461195	0.433655	0.265708
ENSOCUG00000017866	2	1.8636	2.06494	1.10793	4.9293	3.50277	4.52959	3.35296	3.40154	3.17099	4.92466	4.22338	7.29575
ENSOCUG00000017872	2	1.97759	1.32131	1.24405	2.90879	3.50633	2.2937	3.9516	6.2978	5.65957	2.95188	3.16208	1.91398	RASSF9
ENSOCUG00000017881	2	3.60062	4.09006	3.27207	11.1164	8.24201	11.835	16.0273	10.3598	9.15064	13.0388	15.3997	10.1649	MAPK15
ENSOCUG00000017905	2	0.536606	0.149495	0.0765642	9.03706	2.04139	7.26169	7.02474	6.12091	11.782	16.0438	9.25855	20.2548	PCK1
ENSOCUG00000018609	2	#N/A	#N/A	#N/A	#N/A	#N/A	#N/A	#N/A	#N/A	#N/A	#N/A	#N/A	#N/A	#N/A
ENSOCUG00000019225	2	0.132041	0.236877	0.299725	0.549093	0.645268	0.765301	0.614194	0.598754	0.642521	0.559145	0.671835	0.478101	MIR31
ENSOCUG00000019293	2	4.04708	4.47417	3.80382	5.75715	6.33537	6.77759	8.67009	6.49327	5.74439	8.68476	7.84793	10.51	ocu-mir-148a
ENSOCUG00000019319	2	#N/A	#N/A	#N/A	#N/A	#N/A	#N/A	#N/A	#N/A	#N/A	#N/A	#N/A	#N/A	#N/A
ENSOCUG00000019393	2	6.67594	8.7845	8.69897	14.0973	12.5737	13.9768	11.7534	14.1153	9.46627	13.0274	17.5615	16.3444	SNORA74
ENSOCUG00000021058	2	1.72044	2.13482	1.55186	3.15683	4.7223	4.45338	3.43643	4.41088	4.66987	6.10529	3.89287	4.24111	TMEM92
ENSOCUG00000021071	2	8.01269	9.72395	13.4247	13.6004	27.8618	20.5989	23.91	40.105	17.5839	16.9655	24.6022	22.6896
ENSOCUG00000021202	2	0.0471106	0.0410147	0.0700193	0.318854	0.36526	0.351223	0.545777	0.787001	0.494449	0.472066	0.500071	0.420986	ADGB
ENSOCUG00000021234	2	5.87653	7.97988	2.37305	34.8827	66.8818	70.5768	78.0347	42.5236	55.6257	74.7098	84.9543	54.0138
ENSOCUG00000021240	2	0.177018	0.154113	0.0350797	0.564619	0.609984	1.27421	1.96531	0.721934	0.619297	0.319601	0.213524	0	MLC1
ENSOCUG00000021259	2	1.46613	1.19133	0.784466	4.1061	7.04771	5.42752	6.86483	2.82868	3.69306	5.63823	4.95177	6.81279
ENSOCUG00000021648	2	2.55348	2.63615	1.74416	27.1447	12.7043	17.6654	48.1181	24.2263	27.8378	27.991	35.4301	22.0608	KCNK12
ENSOCUG00000021684	2	0.606808	0	0.360753	0.944138	2.61374	1.14398	2.44093	0.761462	1.1676	0.43823	0.29278	0.413144
ENSOCUG00000021773	2	0	0	0	0.623058	1.07325	1.67764	1.43184	1.18647	0.466987	1.28532	1.28808	0.454405	OTX1
ENSOCUG00000021846	2	0.259215	0.188061	0.154106	1.96616	1.23935	2.44897	2.83096	1.34178	0.731157	2.70273	0.203237	4.26874
ENSOCUG00000021875	2	0.463331	0.537837	0.826363	1.18948	1.05375	1.02437	1.65504	1.3736	1.04552	1.30499	1.02834	1.65615	RSPH14
ENSOCUG00000022009	2	6.46088	8.17778	7.61701	21.5704	29.0557	39.1122	41.0544	21.1105	19.1362	24.4173	25.555	25.5731
ENSOCUG00000022273	2	0.589979	0.948255	0.539613	6.18559	2.29885	4.38679	6.44059	6.79122	4.52501	5.6537	5.78079	4.58848
ENSOCUG00000022327	2	6.21104	5.64624	5.33859	11.4918	8.93491	13.3125	13.6902	15.4941	13.2339	15.3211	17.6918	13.5652
ENSOCUG00000022352	2	0.982487	0.651701	0.66754	1.57233	2.6117	2.02061	2.16802	2.50981	1.62041	1.82453	2.57337	1.86343
ENSOCUG00000022368	2	3.15319	3.70002	2.3025	7.24711	5.43866	7.34842	7.16366	5.33848	6.2951	9.02215	7.85498	10.9034	CCDC92
ENSOCUG00000022422	2	0.997598	0.609483	0.749156	3.77422	3.85374	4.10338	3.59895	2.86608	2.59002	5.63091	3.85066	3.37818	COLCA2
ENSOCUG00000022659	2	2.96447	2.1955	1.40355	4.74602	5.58833	5.07609	5.47786	5.01191	4.77263	5.92867	4.29747	3.80838	EFCC1
ENSOCUG00000022669	2	5.57519	6.69682	4.34248	14.543	10.2907	12.7124	14.2906	12.7603	12.1947	11.9565	12.6156	10.6614
ENSOCUG00000022761	2	0.0671347	0.064942	0.106433	1.1699	1.28393	2.45077	2.40888	2.31674	2.12558	1.41815	1.598	1.35983
ENSOCUG00000022857	2	35.2893	36.4724	30.7787	54.5755	81.7059	80.7199	76.8975	75.8395	73.4617	77.9349	72.9988	65.6621	EFNB2
ENSOCUG00000022873	2	1.46126	1.24202	0.785133	5.18265	5.31556	6.16774	8.43486	5.90386	5.36463	8.29896	7.74667	4.15234
ENSOCUG00000022950	2	7.55962	5.51811	5.09044	48.9866	51.8034	71.2619	72.0975	55.493	56.2983	68.4801	73.7865	56.7608	PHLDA1
ENSOCUG00000022961	2	1.24199	0.961141	1.5752	1.70053	1.62631	48.2766	77.458	0.935119	38.0631	2.24238	2.3171	2.19858
ENSOCUG00000023043	2	12.4532	13.2664	9.1946	25.7107	25.9617	30.4404	36.7387	27.4468	27.8942	32.3979	36.6987	29.3973	TLE3
ENSOCUG00000023106	2	2.20027	1.83371	3.08574	4.9508	4.84075	8.12207	9.58606	5.57519	3.78961	4.58369	5.93415	6.16505	SUN3
ENSOCUG00000023589	2	0.343898	0.133066	0.477052	1.39119	0.829524	0.707272	2.04737	1.67224	1.50391	1.05553	1.27212	1.17071	MINAR2
ENSOCUG00000023658	2	0.181532	0.71646	0.345352	2.33866	2.25194	2.31473	2.66386	1.29845	1.71474	1.88784	1.50651	3.07753
ENSOCUG00000023697	2	11.0194	10.1519	9.5073	67.8807	66.9539	79.6538	90.0999	75.7238	74.9782	75.2498	76.7253	55.0184	LRRN1
ENSOCUG00000023701	2	0.0534066	0.0929921	0.0952523	0.648147	0.524494	0.631567	0.979634	0.628294	0.420396	0.636399	1.03073	0.518155
ENSOCUG00000023746	2	4.37237	4.33357	3.5156	9.14502	9.66985	9.0292	9.50338	8.18512	6.57633	12.6825	12.2774	9.93729
ENSOCUG00000023769	2	4.13333	8.75751	4.38975	11.8382	13.6899	14.6081	12.3586	10.4994	13.1408	13.2154	14.4054	15.2457
ENSOCUG00000023790	2	6.01881	3.54445	3.20005	16.9204	14.2652	16.414	24.9433	21.6359	17.3487	21.0126	16.3286	13.4231	ROR1
ENSOCUG00000023927	2	4.28026	5.96225	4.75002	5.86052	6.98132	6.8467	10.2847	8.5043	6.18944	9.47953	11.7486	11.2682
ENSOCUG00000023987	2	1.6122	1.73778	1.36924	3.42478	2.68703	3.67095	4.06582	3.74685	3.33236	3.72461	4.85774	4.85547
ENSOCUG00000024229	2	1.05278	2.13863	0.849418	5.26509	6.25788	6.97883	8.40321	5.89184	5.66283	5.76338	6.4946	7.14222	SOWAHD
ENSOCUG00000024481	2	2.07942	1.25937	1.50498	5.57049	6.40216	8.59968	10.4594	5.51658	5.58265	9.48377	8.76799	7.23272	CAPN3
ENSOCUG00000024485	2	10.9869	13.3835	10.463	24.0274	25.3449	26.1528	33.3104	23.8402	21.2653	32.1426	33.5572	22.7875	RAP1GAP
ENSOCUG00000024520	2	0.0213924	0.173827	0	0.299562	0.375951	0.48396	0.536968	0.342268	0.224524	0.370785	0.392224	0.240322	RGS8
ENSOCUG00000024610	2	16.8331	19.0855	16.5239	363.99	675.217	824.425	554.044	185.688	252.27	538.992	532.074	590.695	CLPS
ENSOCUG00000024647	2	0.194411	0.406212	0.0693475	5.08176	6.67238	7.47685	6.70045	5.9831	5.42756	8.2556	6.41604	8.3985	KCNE2
ENSOCUG00000024673	2	0.0596328	0.0692221	0.0709045	0.723708	0.308232	0.306607	0.230282	0.561233	0.0625875	0.258397	0.345268	0.304506
ENSOCUG00000024788	2	14.3451	22.8423	14.1565	41.9506	29.7016	37.7496	41.6268	34.3162	43.9093	34.707	47.193	41.2063
ENSOCUG00000024861	2	0.364213	0.304402	0.207867	0.489613	0.722901	0.8689	0.914206	0.575867	0.382259	0.505018	0.632627	0.446352
ENSOCUG00000024881	2	3.18556	4.6521	5.21317	76.585	78.4684	142.901	154.96	59.7683	97.3901	108.127	129.869	159.343
ENSOCUG00000024996	2	1.07834	1.37016	1.33415	4.01312	10.093	8.51138	7.65313	5.18412	7.93771	5.91968	6.82004	9.7627
ENSOCUG00000025015	2	1.49054	1.70963	1.70899	6.7421	5.7049	7.22582	8.70251	6.81371	6.64869	8.38096	9.3664	7.7381	EDAR
ENSOCUG00000025031	2	0.750248	0.907952	0.81614	2.51842	1.22113	1.6743	2.18832	2.58401	2.22824	2.05777	2.17193	1.80955	DNAAF4
ENSOCUG00000025111	2	0.48591	0.362602	0.165073	5.21662	3.98266	4.63978	6.96958	6.7617	5.86484	7.03091	6.29659	3.11926	GALNT15
ENSOCUG00000025190	2	27.7334	23.3511	26.8768	119.469	94.4033	127.103	155.85	189.308	136.363	101.703	140.931	94.933	LRRC58
ENSOCUG00000025314	2	3.03191	5.13841	2.884	7.50062	9.74762	11.1304	9.13242	8.41775	8.68723	12.6122	10.1523	9.47499	GABRA4
ENSOCUG00000025320	2	4.11346	3.43198	4.12677	7.12019	7.26444	8.68018	9.14206	6.49262	7.69016	9.28343	7.8975	12.2528
ENSOCUG00000025485	2	0.938811	0.201811	0.496117	2.17483	1.0424	1.57323	2.41692	1.30898	0.948834	3.20166	2.14741	0.497145
ENSOCUG00000025543	2	0.0944403	0.511592	0.187152	1.2343	5.30452	2.62209	2.30975	2.13318	2.51103	3.85351	3.12891	2.37908
ENSOCUG00000025866	2	4.13949	6.14428	3.95368	7.72879	11.575	12.9794	14.7406	8.49427	12.1079	13.0116	12.573	15.3162	AK8
ENSOCUG00000025956	2	25.8052	25.8429	22.2312	57.7073	44.6469	50.2976	63.958	55.8369	71.132	68.1832	73.7088	71.2759	SDC1
ENSOCUG00000025992	2	0.182519	0.242136	0.124011	4.01633	2.0755	3.59287	4.63173	3.21469	1.6967	2.73983	0.125806	5.67193
ENSOCUG00000026094	2	0.345044	0.578542	0.136755	3.43588	2.02127	3.8241	5.14472	2.85047	1.56927	5.14986	0.628928	7.67412
ENSOCUG00000026121	2	0.073682	0.0855305	0.394242	0.75664	0.723614	1.17441	1.10258	0.866821	0.425331	0.51882	1.06653	0.714868
ENSOCUG00000026176	2	0.554293	0.555686	0.179745	0.870268	0.75533	1.13997	1.11889	1.5413	1.00485	1.31008	1.21564	0.463159	LTB4R
ENSOCUG00000026233	2	0.144345	0.223409	0.400468	0.853434	0.795836	1.5338	1.34708	0.996235	1.41398	1.56367	1.0679	1.13019	PLAAT2
ENSOCUG00000026389	2	2.23375	2.16079	1.58094	3.42586	11.3809	8.42233	10.4744	9.31013	10.3825	7.43219	7.44172	7.87579	RASSF1
ENSOCUG00000026416	2	2.28128	3.5776	2.76637	9.49187	15.3212	12.7703	16.5544	6.78231	9.10156	17.8717	15.92	23.0512
ENSOCUG00000026526	2	4.79383	3.09658	3.96773	6.61639	5.58661	7.54113	8.49584	9.55147	7.62452	9.39445	9.79337	6.82597	PPM1E
ENSOCUG00000026551	2	2.32087	1.93421	1.71588	4.56938	7.44378	4.60488	4.69666	4.32656	3.34151	5.38288	4.00544	3.29706	LPAR5
ENSOCUG00000026610	2	11.2948	12.9072	15.769	28.4022	22.1358	23.1932	24.2504	23.3763	18.4915	26.4119	25.0871	28.739	TMEM1
ENSOCUG00000026618	2	0.337291	0.587295	0.69069	1.0146	0.968556	1.23322	1.08542	1.11104	0.94401	1.11644	1.32	1.09081
ENSOCUG00000026658	2	33.5265	34.1632	33.3326	50.3536	53.502	64.154	78.7834	53.8909	47.3724	74.2828	76.9419	52.9107	ADAMTS1
ENSOCUG00000027192	2	2.19903	1.93755	2.04765	21.8893	26.7316	35.0092	28.6474	26.2816	25.0542	23.8504	21.0157	27.572	NPY5R
ENSOCUG00000027198	2	2.20551	2.09041	1.97281	4.13678	4.05795	4.39027	6.11424	3.56108	3.50404	5.0195	5.34999	3.61628	SLC38A4
ENSOCUG00000027209	2	26.7081	36.9279	28.132	63.7808	63.3911	78.6571	66.8994	55.2598	64.6193	80.769	84.399	87.7473	ST6GAL1
ENSOCUG00000027254	2	0.260584	0.0504146	0.10328	0.851434	1.88568	1.9204	1.92872	1.18537	1.64097	2.30534	1.29921	1.72982	ATP4B
ENSOCUG00000027406	2	10.667	13.1969	6.50852	25.1574	16.2506	25.402	26.6938	23.7771	25.7792	25.6955	27.0881	28.0948
ENSOCUG00000027503	2	4.64078	2.15482	8.82876	12.1306	13.4329	19.0887	8.96058	14.85	12.6639	12.0655	7.16524	11.3748
ENSOCUG00000027560	2	1.37367	2.3703	1.28017	5.33748	4.06826	3.32144	6.23656	4.64719	4.559	4.94684	5.26645	4.66366	CACFD1
ENSOCUG00000027563	2	0.171522	0.0995519	0.152957	0.760587	0.398956	0.573231	0.579566	0.363212	0.315036	0.603872	0.331032	0.17517	IQCM
ENSOCUG00000027672	2	3.29005	3.0658	2.44047	5.80468	4.85208	6.98368	8.77116	5.70991	4.8628	6.71938	6.1021	3.39085	PPFIA4
ENSOCUG00000027714	2	0.0562931	0.343063	0.167334	0.840834	0.581939	1.08538	1.50811	0.927153	0.768071	1.11291	1.19508	1.12107
ENSOCUG00000027810	2	1.37013	0.971948	1.15396	4.12149	3.16722	4.50075	4.37243	3.83268	3.87467	3.93737	4.73773	3.47876	ZFAND4
ENSOCUG00000027882	2	0.807134	0.537865	0.284355	2.00932	1.86965	2.18256	4.24243	2.15229	1.757	2.47734	2.19238	0.53427
ENSOCUG00000027976	2	3.0851	3.53146	2.75118	6.60018	7.17585	7.97519	8.23199	9.15419	5.53152	5.10588	6.61571	3.80712
ENSOCUG00000028180	2	0.703492	0.571632	1.00376	1.11646	2.03629	3.18301	2.03749	0.993135	2.58422	1.82899	1.35772	1.65245
ENSOCUG00000028213	2	0.432024	0.501496	0.821896	30.2486	15.6314	24.7007	24.4411	37.2444	28.5661	24.3362	41.6896	38.2974	PIFO
ENSOCUG00000029139	2	0.273701	0.317714	0.260349	0.332166	0.39612	0.408104	0.620954	0.540946	0.330352	0.637466	0.528234	0.642903	CPA4
ENSOCUG00000029307	2	0.0829188	0.0385011	0.0394368	0.37156	0.0857186	0.324013	0.272174	0.218509	0.19146	0.269474	0.320061	0.101619
ENSOCUG00000029312	2	0.0583627	0.541982	0.62455	2.17937	3.68034	3.78096	8.28263	3.3506	2.6952	0.316117	0.675829	0.71525	SLC32A1
ENSOCUG00000029332	2	0.361417	0.18646	0.190992	1.38709	2.7814	3.30356	3.02396	1.36059	1.47515	3.91517	1.62755	2.66576	CPN2
ENSOCUG00000029361	2	1.26335	1.61316	1.42704	3.36128	3.91803	4.15719	2.98817	3.26975	3.24857	4.03727	3.7183	3.09654
ENSOCUG00000029449	2	5.42932	7.55097	6.48601	13.8428	12.1784	12.7199	12.1891	13.9555	12.9556	9.29386	11.8129	11.5342
ENSOCUG00000029470	2	0.116371	0.472796	0.207552	1.1407	0.481203	1.55566	1.46051	1.64284	1.22137	1.70185	1.57215	0.950773
ENSOCUG00000029541	2	0.420181	0.709452	0.476894	0.802345	1.1649	1.15875	1.08788	0.880779	0.621409	1.09656	1.06896	0.721699	ZNF157
ENSOCUG00000029637	2	11.9695	9.05799	7.41704	23.3151	18.6557	27.6939	21.5778	21.5769	19.8344	27.2293	24.4557	22.4265
ENSOCUG00000029652	2	0.029551	0.034303	0	0.202306	0.0712806	0.111422	0.228232	0.185412	0.103384	0.14939	0.209119	0.291736	MYH4
ENSOCUG00000029657	2	0.17307	0.0669667	0.0685944	2.26195	2.44515	2.28395	1.94932	1.79172	1.21097	5.12454	1.94844	3.50556	SERPINA9
ENSOCUG00000029733	2	9.84986	7.20578	8.14151	18.9634	11.1339	17.9687	22.0748	22.171	20.1003	17.027	17.6053	13.1925
ENSOCUG00000029756	2	2.71162	2.12709	1.98072	6.53159	7.91206	10.5636	8.61299	6.52381	5.46856	8.67201	7.03733	6.39869	SIAH3
ENSOCUG00000029792	2	0.695254	0.55873	0.76308	1.54774	1.32689	2.69478	1.85874	1.61068	1.85232	0.984897	0.464475	1.63856
ENSOCUG00000029817	2	1.09536	1.2715	1.55824	6.33628	4.97424	8.48806	8.32767	7.89741	6.4667	5.19132	6.60629	7.83063
ENSOCUG00000029840	2	2.15242	1.32276	1.27964	2.24578	5.17009	2.92946	4.58379	2.97904	2.79062	1.98879	2.13814	0.517225
ENSOCUG00000029927	2	0.245922	0.203905	0.292405	0.557548	0.472133	0.758655	1.221	1.12418	1.10617	0.875323	0.881438	0.502305
ENSOCUG00000030078	2	0.156544	0.181717	0.186134	1.40295	0.550222	0.772689	1.84379	1.26705	0.952944	1.15316	1.57105	0.191849
ENSOCUG00000030161	2	1.88298	2.45233	1.85665	4.54467	2.94358	5.10048	4.96586	3.76044	4.00076	5.57213	5.67272	7.78593
ENSOCUG00000030185	2	0	0	0	0.432192	0.287154	0.85692	0.312863	0.871423	0.437307	0.651968	0.759469	0.141842
ENSOCUG00000030257	2	0.260388	0.453389	0.0774014	1.33696	0.807539	0.669401	0.942685	0.980253	0.478256	0.84622	0.439722	1.0637
ENSOCUG00000030403	2	0.335543	0	1.09716	9.00578	3.46873	7.67723	9.39424	9.86861	10.9172	12.4495	14.166	16.7057
ENSOCUG00000030601	2	0.043928	0.152976	0.0522312	2.29649	0.862813	1.85204	1.86599	1.86042	1.24482	1.85587	2.28905	2.19826
ENSOCUG00000030607	2	0.384706	0.148856	0.228712	1.49642	5.40204	3.09886	8.5113	2.65515	1.31225	0.729305	0.649662	0.0982223
ENSOCUG00000030642	2	2.37747	3.51245	2.56987	47.2143	35.3581	46.1732	33.8028	27.3083	30.5671	22.0671	22.108	39.4557	SMIM32
ENSOCUG00000030993	2	19.9196	25.692	13.1582	78.5159	52.6246	68.2789	87.6069	85.4045	58.074	119.881	121.74	180.83
ENSOCUG00000031234	2	0.0382872	0.088888	0.0910484	1.32248	0.43538	0.984282	1.25675	1.47739	0.723317	0.580662	1.62565	2.4243
ENSOCUG00000031504	2	0.737009	0.598867	0.297948	1.98153	2.25521	2.48584	2.03495	2.31674	1.45423	2.71452	2.03404	2.00214
ENSOCUG00000031612	2	0.070869	0.0822652	0.0842646	0.793913	0.586096	0.874508	1.5052	0.73368	0.966946	0.690941	1.16259	0.361882
ENSOCUG00000032017	2	0.338504	0	0.402487	4.74013	11.5478	4.87324	9.15033	6.37164	4.97387	5.86713	3.91981	3.45704
ENSOCUG00000032069	2	0.0348762	0.0404844	0.0414684	0.162792	0.432645	0.322773	0.505051	0.262589	0.219625	0.264465	0.0673098	0.106854
ENSOCUG00000032489	2	0.256312	0.433541	0.322174	2.03729	5.01922	2.63569	5.93168	3.19798	2.6978	3.63335	4.22592	2.62512
ENSOCUG00000032550	2	0.0551732	0	0	0.875613	0.399253	0.737561	0.479386	0.467335	0.347442	0.717218	0.958342	0.845202
ENSOCUG00000032613	2	2.9338	1.48902	1.78192	5.47767	5.36987	7.23526	10.5201	8.76153	6.54489	8.75019	8.41967	2.38659	SLC2A13
ENSOCUG00000032665	2	#N/A	#N/A	#N/A	#N/A	#N/A	#N/A	#N/A	#N/A	#N/A	#N/A	#N/A	#N/A	#N/A
ENSOCUG00000032782	2	0.918569	2.06984	1.67042	2.42125	2.90461	51.5629	85.6547	2.23755	42.1928	2.39987	1.45996	2.26249
ENSOCUG00000032802	2	0.0675418	0.313612	0	0.315267	0.768047	0.97236	0.652061	0.381401	0.496219	0.804836	0.391061	0.344892
ENSOCUG00000032827	2	0	0	0	0.123214	0.272884	0.882197	0.254842	0.248436	0.27705	0.357444	0.318409	0.202189
ENSOCUG00000032959	2	1.87834	4.49293	2.30107	5.63251	5.47226	6.32137	5.71491	5.14269	5.79476	7.02923	8.40374	7.84758
ENSOCUG00000033001	2	0	0	0	0.981854	1.39791	1.85405	0.580215	1.55548	0.473083	1.13934	1.73986	2.60858
ENSOCUG00000033096	2	0.453592	0.526532	0.395508	1.01628	1.53176	0.870679	1.34291	0.882253	1.04735	0.786189	0.787875	0.154413
ENSOCUG00000033208	2	0.785271	0.512745	0.933702	0.939266	2.73978	2.37205	3.60104	1.27025	2.03469	0.717753	1.3261	0.30074
ENSOCUG00000033265	2	0.295011	0.335316	0.263081	0.608189	0.845028	0.891134	0.925629	0.728829	0.619257	1.05195	0.854043	0.954074	C4orf54
ENSOCUG00000033276	2	1.28029	2.19014	0.961445	3.334	3.5526	3.60317	5.91986	3.80508	3.81901	4.9637	4.09652	3.37203
ENSOCUG00000033346	2	0.549481	1.68158	0.831528	4.70995	4.49264	5.34219	7.2338	4.79532	5.97678	9.19921	7.13414	12.3457
ENSOCUG00000033384	2	0.945308	0.480077	0.0702494	1.15826	1.09938	1.8834	2.11043	1.1677	1.11617	1.66406	1.93844	1.50846
ENSOCUG00000033479	2	0.85323	0.696973	0.901784	1.71106	1.33939	2.3722	3.81353	2.02241	1.35984	2.46477	2.16511	1.06502
ENSOCUG00000033613	2	4.7542	6.49598	5.82949	23.6707	24.1641	29.5366	23.427	40.6425	36.2798	26.3408	30.0114	39.6013	PON3
ENSOCUG00000033778	2	1.61219	1.84942	1.6914	9.93333	8.2547	9.53744	10.5838	9.01459	10.7297	11.3622	10.9817	14.1016
ENSOCUG00000033805	2	0	0	0	0.863262	0.294135	0.512022	0.961407	0.334728	0.298625	0.462335	0.068641	0.726448
ENSOCUG00000033850	2	1.63395	2.31753	1.71816	37.6717	31.6605	48.5582	44.2078	29.2228	23.6604	43.7031	49.0561	39.6004
ENSOCUG00000033855	2	0	0	0	0.195588	0.649755	0.933587	1.07875	0.460088	0.513081	0.302613	0	0.0713224
ENSOCUG00000033996	2	0.0197442	0.00254658	0.00521695	0.0348162	0.0317503	0.0383507	0.033887	0.0330351	0.0207225	0.0285181	0.0127019	0.00448093
ENSOCUG00000034012	2	0	0.0276716	0	0.111271	0.0739296	0.0980531	0.299181	0.224354	0.100078	0.0516472	0.0920143	0.194763
ENSOCUG00000034343	2	0.0972055	0.0564183	0.173369	0.998202	0.904389	1.54935	1.73611	0.77762	0.816175	1.52686	0.984918	1.4891
ENSOCUG00000034453	2	0.0776071	0.0900868	0.0922763	0.470923	0.862446	1.03746	1.7045	0.912996	0.468351	1.05088	1.02973	0.35666
ENSOCUG00000034606	2	0	0	0	0.479656	0.579436	0.480317	0.631313	0.439602	0.294141	0.708389	0.360588	0.238513
ENSOCUG00000034786	2	0	0	0	0.382359	0.317555	0.315881	0.395413	0.578209	0.107468	0.443688	0.0988089	0.41829
ENSOCUG00000034789	2	0.178852	0.269896	0.106329	2.42936	1.31273	2.63	2.84037	3.05512	2.73124	2.12153	3.08072	1.7809
ENSOCUG00000034906	2	0.120388	0.232913	0.0954294	1.16134	1.3275	0.784049	1.16225	1.13303	1.47412	1.17373	1.51025	1.06556
ENSOCUG00000035319	2	0.256724	0.389701	0.281769	1.19832	1.00032	1.07628	1.65866	1.02222	1.0156	1.58306	1.35301	1.55294
ENSOCUG00000035379	2	0.0673837	0.0782194	0.0801205	1.19521	0.905566	2.00946	2.79729	2.21963	1.48517	1.02194	2.73101	1.78924
ENSOCUG00000035511	2	0	0	0	0.177886	0.078793	0.156755	0.220751	0.143467	0.039998	0.123851	0.147101	0
ENSOCUG00000035512	2	0	0	0	0.163593	0.11148	0.110893	0.182192	0.088806	0.0565912	0.0876152	0.0260157	0.165199
ENSOCUG00000035533	2	0.544351	0.631886	1.10956	5.95292	4.9038	7.03703	5.33033	6.29415	5.22352	7.75016	6.15339	3.73267
ENSOCUG00000035685	2	8.146	9.92872	8.78635	22.7053	24.4812	36.2589	40.5572	19.0569	17.3435	32.4613	36.6648	37.199
ENSOCUG00000035803	2	0.216826	0.385929	0.206248	3.47482	2.25642	5.70049	7.86374	6.65933	5.61338	7.37536	6.17937	5.54333
ENSOCUG00000035814	2	0.350176	0.203243	0.277578	0.762779	0.784334	1.50038	1.0142	1.53798	0.857563	0.37934	0.675829	0.119208
ENSOCUG00000035882	2	0	0	0	0.0780268	0.151206	0.171896	0.2219	0.0786622	0.109653	0	0	0
ENSOCUG00000035963	2	0.77669	0.491774	0.839544	1.91156	1.67882	1.9604	1.90866	1.92713	0.963387	1.07084	1.43085	2.09119
ENSOCUG00000036016	2	3.71465	2.19254	2.91958	10.2858	7.15947	8.61081	15.8643	11.7325	10.4406	10.0942	14.2168	7.71593
ENSOCUG00000036251	2	0.166558	0.145006	0.04951	0.0777445	0.990044	0.642276	0.844187	0.352699	0.437026	0.676609	0.482176	0.340201	PRR35
ENSOCUG00000036405	2	0	0	0	0.336021	0.279071	0.4164	0.347494	0.169379	0.094444	0.292439	0.217086	0.137849
ENSOCUG00000036429	2	0	0	0	1.67226	0.972189	1.01311	2.03199	1.47515	1.50405	1.26132	2.24715	0.594557
ENSOCUG00000037022	2	1.92156	2.58275	1.56326	4.34303	3.97288	5.51191	4.9795	4.56877	3.39667	2.73894	3.22058	1.85915
ENSOCUG00000037118	2	0.646052	0.831753	0.544701	1.33783	0.728582	1.24414	2.4268	1.14973	1.02326	1.66693	1.94964	1.22362
ENSOCUG00000037170	2	2.56961	2.35485	2.97491	4.73456	6.64093	6.1887	5.81016	4.9004	4.54219	2.71036	3.58893	2.5552
ENSOCUG00000037275	2	11.9664	12.7405	10.3767	24.3703	11.8189	16.8904	25.8278	24.1743	23.9988	19.362	22.4697	28.6064
ENSOCUG00000037497	2	2.62067	4.26738	2.9862	4.85905	5.26782	5.27747	6.28997	4.86437	4.16399	6.07216	6.39252	6.6167
ENSOCUG00000037892	2	1.73572	0.619947	1.11128	6.23218	2.7605	4.25621	3.99588	5.15201	3.64344	7.52108	5.28249	5.99969
ENSOCUG00000038034	2	0	0.0764294	0	0.491729	0.27226	0.609354	0.762777	0.495734	0.207312	0.356626	0.254145	0.672422
ENSOCUG00000038052	2	0	0	0	0.185727	0.257082	0.204581	0.384135	0.327669	0.104403	0.323275	0.191981	0.253974
ENSOCUG00000038284	2	1.09501	0.844436	0.500766	4.49644	1.74944	6.20492	3.18622	5.67174	2.78075	3.87384	0.783266	0.633446	U2
ENSOCUG00000038285	2	0.198883	0.143295	0.138623	0.614618	0.942915	1.19888	2.3504	1.0908	0.676596	1.93901	1.62138	0.50428	GRIN2A
ENSOCUG00000038328	2	#N/A	#N/A	#N/A	#N/A	#N/A	#N/A	#N/A	#N/A	#N/A	#N/A	#N/A	#N/A	#N/A
ENSOCUG00000038395	2	0.0420041	0.0487586	0	0.313702	0.260535	0.950256	0.202758	0.355789	0.0881707	0.182009	0.567466	0.128693
ENSOCUG00000038614	2	2.64307	4.04016	3.20489	8.8925	9.44136	9.74142	10.434	6.72369	5.82272	4.96098	5.37882	4.0623
ENSOCUG00000038723	2	2.27154	1.75788	2.7009	21.5593	52.0526	28.4196	39.8392	35.9872	27.417	17.225	12.7867	15.4657
ENSOCUG00000038903	2	0.681181	0.720536	0.517593	2.44582	2.45422	4.02873	5.33881	4.60903	3.79041	5.54088	5.6398	3.86529
ENSOCUG00000038939	2	0	0.0975885	0.0499802	0.510138	0.304179	0.734825	0.608717	0.316488	0.17647	0.546427	0.365066	0.0858578
ENSOCUG00000039024	2	0	0	0	0.157888	0.131129	0.217396	0.285738	0.238761	0.133131	0.13741	0.367212	0.0863625
ENSOCUG00000039045	2	0.0940801	0.0364029	0	0.87828	0.972568	1.09643	1.57433	1.15106	0.822847	1.01915	1.21048	0.54446
ENSOCUG00000039374	2	0.18714	0.217234	0.222513	2.00909	2.32151	3.27147	2.34869	1.58514	2.16054	2.7368	1.62529	1.52897
ENSOCUG00000039673	2	0.760559	0.596218	0.387565	1.43847	1.00067	1.3712	1.48758	1.34793	1.17145	1.2412	0.972214	0.645599
DTOCUGCCND1	3	9.36122	9.26657	6.46444	14.3329	17.5933	18.0321	15.8757	9.94536	10.468	11.5095	12.5988	8.5437	CCND1
DTOCUGDMRTB1	3	1.16254	4.21713	1.55507	6.88475	6.68497	6.53765	5.47138	3.04302	6.86329	8.18583	4.55744	10.3886	DMRTB1
DTOCUGMSX1	3	1.04088	0.992496	0.707213	2.98452	2.95906	2.40829	1.93798	1.78431	2.30195	1.69135	0.896812	2.01214	MSX1
DTOCUGWNT6	3	43.0024	70.5761	69.6813	170.313	210.277	245.891	208.182	135.324	161.36	112.022	112.877	154.25	WNT6
ENSOCUG00000000072	3	0.0372223	0.172831	0.309806	0.555979	1.00046	1.49277	1.40147	0.665602	1.13293	0.685478	0.466946	1.52056	CBLN4
ENSOCUG00000000182	3	2.11933	4.30523	2.27493	4.78134	9.859	6.08398	6.87696	4.12772	6.48765	4.81487	5.39684	6.4331	LYPD1
ENSOCUG00000000299	3	2.00275	3.5647	3.33383	8.35113	9.10964	12.2194	5.28487	3.64411	3.64344	4.04981	1.80378	2.18171
ENSOCUG00000000320	3	5.16539	6.0897	5.1821	10.247	16.52	11.8682	11.1423	8.73531	12.0286	9.6174	5.99699	7.08863	FAM11C
ENSOCUG00000000378	3	1.34873	1.9269	0.945749	4.84268	3.61079	4.26743	2.33707	1.62737	1.45185	3.3342	2.603	2.5076	SPO11
ENSOCUG00000000483	3	0.481957	1.96929	0.458445	2.89754	2.01285	3.05292	1.06086	1.19748	1.94241	1.21126	1.39524	2.44135	CAPN9
ENSOCUG00000000528	3	9.61486	8.66226	13.4798	14.7366	31.1537	26.8575	25.0762	15.937	21.0862	12.7475	14.8174	36.0532	TCF15
ENSOCUG00000000563	3	1.45422	1.03038	0.673674	4.05511	2.14761	2.44702	4.57645	0.782079	3.64721	2.90516	3.22577	1.52373	QRFPR
ENSOCUG00000000657	3	0.436465	0.777447	0.38475	1.62984	1.38472	1.5941	1.6201	1.33857	1.40587	1.01085	0.697128	1.25271
ENSOCUG00000000664	3	1.68177	2.84343	0.695531	3.27653	3.93064	4.47385	4.23549	2.16773	3.06973	2.57432	2.15208	1.79221	FRMD5
ENSOCUG00000000852	3	2.13939	2.92953	1.94972	6.03948	5.2046	6.23103	4.40289	4.05107	3.91263	5.25961	4.67288	4.5137	CCDC181
ENSOCUG00000001012	3	0	0.107611	0.137783	0.778885	1.17396	1.50142	1.99132	0.610733	1.48378	0.401696	0.201279	0.236688	SLC18A1
ENSOCUG00000001020	3	14.6196	13.1919	13.5126	24.6482	25.3658	31.0067	29.6064	25.5477	24.6543	24.5187	25.2579	16.1942	GNAI1
ENSOCUG00000001021	3	0	0	0	0.642409	0.311226	0.751851	0.415214	0.0809551	0.270838	0.372725	0.124508	0.351388
ENSOCUG00000001100	3	9.2196	18.4612	9.9574	26.3945	28.3544	30.4961	25.9605	11.2078	17.1756	18.3935	15.94	22.2054	SOX15
ENSOCUG00000001103	3	0.591591	0.561863	0.447626	5.7738	4.05858	4.75613	4.04985	1.61971	2.14494	1.63128	1.40124	2.30685
ENSOCUG00000001135	3	0.223478	0	0	1.25176	1.61717	1.37884	1.726	0.630978	1.75913	0.48418	0.970438	0.342348	RGS9BP
ENSOCUG00000001160	3	10.7742	7.48239	8.92311	15.349	20.7631	16.0746	13.3778	13.657	12.2559	10.5246	10.8777	12.7207	HOXC9
ENSOCUG00000001172	3	5.71413	5.65335	6.68968	17.1029	11.8141	10.9383	18.213	9.87867	9.66942	10.0183	11.4183	9.35503	CCDC138
ENSOCUG00000001183	3	2.0146	4.26034	2.56141	10.316	10.743	9.96849	7.74119	3.97979	5.61053	7.75716	5.71667	6.45753	SH3GL2
ENSOCUG00000001190	3	4.5935	9.00304	4.08945	10.5374	12.2175	15.5711	10.6075	5.6049	7.48602	11.5024	7.84066	10.844	GFRA2
ENSOCUG00000001230	3	0.466528	0.465983	0.335406	1.16477	0.796323	1.52847	1.08932	1.03131	0.956513	0.951998	0.827096	0.808859	XDH
ENSOCUG00000001242	3	1.56132	1.90948	0.950318	2.75027	3.11278	2.98169	2.54809	1.4082	2.11662	2.46655	1.84743	1.29081	ESRP2
ENSOCUG00000001255	3	0.369672	0.429118	0.293032	1.03532	2.42031	2.9144	2.14133	1.85555	1.03464	1.33487	0.951274	1.25845
ENSOCUG00000001257	3	2.86101	1.94889	1.60923	5.72559	7.2612	3.78763	3.12593	2.37016	3.30844	5.80883	3.63701	2.53695	TMEM144
ENSOCUG00000001263	3	0.266338	0.318828	0.138548	0.644906	0.774369	1.06984	0.578536	0.250663	0.532863	0.513925	0.305201	0.365504	TECTA
ENSOCUG00000001290	3	1.3534	1.02722	0.773664	2.42973	2.85201	3.21167	2.41218	0.710362	0.792181	0.902226	0.602775	1.11638	SYT12
ENSOCUG00000001316	3	2.40638	5.98802	3.223	14.5116	14.2538	15.615	13.218	5.8311	11.2201	10.7418	7.38006	8.41786	ESRP1
ENSOCUG00000001363	3	0.761858	1.80804	0.744821	4.03029	2.10022	2.05433	1.01337	1.06756	1.7769	2.29252	0.865879	1.05471
ENSOCUG00000001367	3	0.275338	0.559324	0.327382	1.73502	1.56549	2.33586	0.398724	0.323917	0.650206	1.34221	0.730666	0.492091	TENT5D
ENSOCUG00000001373	3	5.68105	5.83815	4.45027	27.3131	25.7024	28.6597	32.601	24.5791	32.0223	14.227	11.7382	15.7675	BRINP1
ENSOCUG00000001387	3	54.1175	90.3416	55.51	142.207	129.447	142.461	79.9859	33.1259	64.4344	62.7918	56.1619	67.1615
ENSOCUG00000001462	3	0	0.0572893	0.0586817	1.15183	0.561214	0.609006	1.28645	0.557382	0.673379	0.908876	1.09537	0.302417	INSYN2A
ENSOCUG00000001477	3	3.58763	11.8273	2.04757	15.6743	12.6098	13.2812	9.14381	5.40239	8.88633	7.30647	4.98529	8.35379	FOXA3
ENSOCUG00000001497	3	18.7773	27.1838	28.6086	47.7894	45.3915	55.7244	65.1365	36.3523	46.9837	49.19	39.4088	61.9779	FABP7
ENSOCUG00000001601	3	9.03078	9.77055	8.82652	20.49	16.8889	25.2148	21.6692	16.2559	14.6928	14.5319	15.5395	14.0283	SLC18B1
ENSOCUG00000001671	3	7.19923	11.4872	5.84028	15.1274	16.3283	17.1088	12.2734	7.07012	11.8014	10.7462	9.38676	10.549	LARGE2
ENSOCUG00000001717	3	1.61042	1.70322	1.65951	5.37882	7.84304	9.71531	10.814	6.73619	6.49793	5.07855	5.11103	3.83757	SKAP1
ENSOCUG00000001720	3	0.0688345	0.23971	0.286459	1.51011	1.63665	2.30047	1.42876	1.19849	0.650206	1.37949	0.863514	1.44112	HOXB1
ENSOCUG00000001891	3	1.38513	3.92221	1.37245	8.73806	7.26795	7.33753	5.18681	2.15293	5.83705	7.8889	5.20473	6.62284	GPAT2
ENSOCUG00000002244	3	0.309385	0.291798	0.114958	1.28166	2.33877	1.84922	2.25881	0.873531	0.852376	0.775038	0.802357	0.454201	AMPH
ENSOCUG00000002261	3	0.877072	2.09278	0.753173	2.41087	6.80015	1.20254	1.08195	1.05475	1.38079	2.58643	1.26954	1.5924	CPN1
ENSOCUG00000002425	3	0.604507	0.324794	0.283401	1.3415	1.29269	1.63043	2.35108	1.76856	1.41756	1.27228	1.17001	0.398642	RYR2
ENSOCUG00000002426	3	2.1565	1.68699	2.42476	5.68944	7.36642	7.06244	6.90202	4.76511	4.15767	3.42797	3.43815	4.52443
ENSOCUG00000002427	3	0.182203	0.0352503	0.108321	0.396887	0.439494	0.530858	0.351803	0.0857398	0.223102	0.296065	0.556771	0.124052	SLC6A17
ENSOCUG00000002443	3	0.0923192	0.107165	0.0365898	0.746929	0.858928	0.126578	0.802139	0.463392	0.419872	0.633383	0.326651	0.251421	EGR4
ENSOCUG00000002453	3	0	1.2917	0.756054	4.15525	4.27267	3.26934	3.83671	1.34649	3.50369	2.23866	2.60779	4.22103	EN2
ENSOCUG00000002457	3	0.269156	0.760267	0.213355	2.32006	1.215	2.58326	2.60714	0.886606	1.93978	2.3423	1.48047	2.9504
ENSOCUG00000002466	3	1.26207	2.28205	0.952322	3.76118	2.86028	4.29275	3.16322	2.19286	2.90394	4.02267	3.23206	2.6522	STAT4
ENSOCUG00000002487	3	1.13952	4.62966	0.846818	5.85085	10.013	8.93485	7.9758	2.94925	4.48492	5.55489	6.46024	8.87364	LGALS2
ENSOCUG00000002503	3	1.50239	1.49157	0.987207	1.55019	3.00407	3.31348	4.19863	1.507	1.70132	1.86308	1.73593	1.77662
ENSOCUG00000002522	3	1.3066	1.13219	0.919015	2.42236	2.94875	4.03079	4.3883	4.05283	2.99377	2.5318	1.97119	1.6351	PTGFR
ENSOCUG00000002626	3	4.86705	5.31736	2.38289	6.68177	8.6816	8.63583	8.6604	4.04171	8.01286	9.82111	8.10397	11.6955	LMO1
ENSOCUG00000002633	3	0.0957498	0.222294	0.170773	0.625707	0.593897	0.787688	0.138658	0.0450574	0.050247	0.0518621	0.32339	0.14668	OTX2
ENSOCUG00000002687	3	0	0.240863	0	2.64733	1.21551	1.28023	1.80288	0.911329	0.58074	1.57344	0.867666	0.63573
ENSOCUG00000002831	3	0.395775	1.07197	0.329409	1.35474	1.33652	1.32947	0.764176	0.533892	0.983077	0.95751	0.420108	0.538924	POU2F3
ENSOCUG00000002891	3	0.541182	0.523506	0.268115	1.30514	6.06076	0.927509	1.21909	0.509332	0.662662	2.00303	0.870386	0.967213	SERPINC1
ENSOCUG00000002944	3	1.38274	1.7417	1.27681	2.30706	3.55837	4.25056	3.03908	1.41212	2.08425	1.46603	1.24915	1.23188	SLC34A2
ENSOCUG00000003048	3	0.632966	0.5878	0.430062	1.04674	0.953465	1.22739	1.46658	0.629755	0.70229	0.391818	0.698059	0.572552	TPPP
ENSOCUG00000003063	3	9.69415	10.5094	9.34309	19.0367	25.6055	23.0991	27.1078	21.9248	15.6427	16.4693	16.3192	17.9253	ALDH5A1
ENSOCUG00000003140	3	0.286931	0.592127	0.720241	1.63694	1.77972	2.06539	1.50816	0.510084	1.5392	1.07063	0.523003	0.390713	NFE2L3
ENSOCUG00000003165	3	6.75903	7.08313	6.02746	14.0595	14.2102	16.3142	16.2355	13.2652	12.161	14.1935	12.6047	8.23132	SCUBE2
ENSOCUG00000003175	3	0.572187	0.379542	1.06911	2.97605	1.43652	3.026	1.49937	0.692373	0.171582	0.354194	0.552151	0.333919
ENSOCUG00000003197	3	5.03524	10.4374	7.48375	18.9704	13.0132	28.8478	15.2778	9.47782	7.9271	11.4936	16.3121	14.8761	PLAC1
ENSOCUG00000003233	3	0.871574	1.56818	1.16586	1.48492	3.76169	1.99416	1.80908	1.4765	1.18919	2.12436	1.55595	1.75797	TRIM7
ENSOCUG00000003275	3	1.66853	4.17496	2.20435	6.81902	4.33133	5.37608	3.36483	3.10576	5.09794	6.82828	3.54222	5.71793	HORMAD1
ENSOCUG00000003317	3	1.17823	2.26913	1.08254	3.44977	2.85125	3.6623	2.8954	1.41131	1.91112	2.78477	1.62793	2.26984	ZNF215
ENSOCUG00000003531	3	0.128911	0.359136	0.0919662	1.01089	0.852885	1.32561	0.348467	0.315442	0.351774	0.837879	0.671741	0.842576	B4GALNT2
ENSOCUG00000003533	3	0.244472	0.585879	0.196914	0.964438	1.41853	1.50837	0.669986	0.719942	0.538002	0.751783	0.715346	0.475183	RASGRF2
ENSOCUG00000003641	3	0.0890111	0.309974	0.0529179	0.955602	0.598108	1.32721	0.257798	0.33509	0.0467107	0.433909	0.171788	0.0454522	LHX8
ENSOCUG00000003667	3	1.17121	1.63146	0.557038	2.47833	2.50224	3.21167	1.20609	0.5144	0.737548	0.67667	0.753468	1.43535
ENSOCUG00000003734	3	0.550197	0.628996	0.48569	2.00006	1.54259	1.92878	2.28564	1.07486	1.23366	1.15592	1.17448	0.919473	TRPM6
ENSOCUG00000003845	3	0.178634	0.251793	0.227571	1.16734	1.17395	0.997185	2.14339	0.828596	1.299	1.4928	1.56372	0.716703	GRIK2
ENSOCUG00000003870	3	1.52459	3.36599	2.63028	4.68842	4.63548	6.6399	3.86724	0.87217	2.91788	3.10881	2.74047	2.68661	FGF19
ENSOCUG00000003953	3	1.99005	2.50257	2.16902	10.0631	6.51461	11.9373	5.76369	1.56078	8.70273	7.90456	6.40122	15.5816	C1orf146
ENSOCUG00000004106	3	1.57852	3.09211	2.07799	7.4339	5.92993	6.05809	6.81688	3.03757	4.4229	5.55746	5.33137	5.32569	GLDC
ENSOCUG00000004238	3	3.75624	3.66263	2.8584	19.6371	45.199	8.34322	21.1778	7.07036	16.2425	8.95196	17.5436	10.5877
ENSOCUG00000004240	3	0.491349	1.47623	0.893518	3.21087	3.43606	3.03157	2.90195	1.27849	3.1245	1.94122	1.2272	2.59755	DND1
ENSOCUG00000004324	3	2.80419	2.66643	1.66712	5.34708	4.84175	5.24569	3.71522	2.72339	3.09969	2.74689	2.10147	3.41224	ZFP42
ENSOCUG00000004362	3	0.954455	0.900198	0.662004	1.68924	1.60336	1.41088	1.91968	0.973139	1.44001	1.87402	1.57343	1.05599
ENSOCUG00000004417	3	0.167674	0.311419	0.159494	0.626124	0.693342	1.03453	0.712251	0.189367	0.422356	0.726553	0.388326	0.513721
ENSOCUG00000004430	3	0.0455146	0	0	1.24637	1.28607	0.982871	2.02127	0.499753	0.557314	0.871059	0.980899	0.681747
ENSOCUG00000004433	3	0	0	0	0.291964	0.444549	0.120601	0.0754831	0.183964	0.0410305	0.0846987	0.113174	0.359325	SLC17A2
ENSOCUG00000004509	3	0.139721	0.274043	0.0515578	0.274364	0.418373	0.39635	0.455831	0.185911	0.268004	0.354906	0.260358	0.33951
ENSOCUG00000004647	3	1.18614	1.20998	0.641064	4.63058	6.79977	5.17458	4.16406	0.981018	0.980837	0.506182	0.728384	0.403789
ENSOCUG00000004661	3	2.69997	6.12795	2.5395	13.8442	7.45692	13.0119	6.88609	3.48923	5.37144	9.90951	6.2608	6.2556
ENSOCUG00000004745	3	0.744928	1.0809	0.541281	2.14422	1.60433	2.064	2.01766	1.26585	2.36723	2.03983	1.47762	1.90193	C14orf39
ENSOCUG00000004788	3	11.1103	14.881	10.5005	18.8823	30.3334	21.385	19.9395	19.3042	15.6972	11.727	11.8209	22.1114	ARL4D
ENSOCUG00000004926	3	1.9507	5.66096	1.37716	5.91846	7.87721	7.64762	4.06074	3.15545	2.68715	3.96217	2.05887	3.17506	GJB3
ENSOCUG00000004957	3	2.13883	2.05471	2.65273	11.8253	8.38675	13.2722	12.4782	9.80449	9.34692	6.57138	8.23796	5.68678	GALNT3
ENSOCUG00000004969	3	1.25141	1.96666	1.14458	2.2646	3.58246	3.3062	1.98877	0.94221	2.46518	2.10644	1.63489	2.43809	INA
ENSOCUG00000005027	3	12.1136	19.2293	13.6511	31.5963	35.3033	30.9248	26.036	26.5282	22.7841	17.2598	20.8692	21.7754	PNP
ENSOCUG00000005126	3	0.479337	0.409991	0.269972	1.24824	1.27793	0.415082	0.633251	0.641075	0.423652	0.655904	0.80338	0.283414	RHOH
ENSOCUG00000005309	3	2.03286	6.51203	1.9058	11.5691	10.7702	12.5023	9.75619	3.99202	9.29342	8.13107	6.99791	9.38239
ENSOCUG00000005310	3	0.141788	0.0705378	0.0481682	1.15347	1.71703	1.2914	0.879972	0.590964	0.21259	0.263308	0.332284	0.144804	PRMT8
ENSOCUG00000005311	3	0.606972	0.29809	0.555155	1.56915	2.05133	0.696177	0.878972	0.549279	0.80856	1.11273	1.12638	0.834458	IL17RE
ENSOCUG00000005623	3	0.217271	0.270224	0.10149	0.644715	0.665799	0.654309	0.988853	0.613451	0.700396	0.655661	0.561596	0.324913	SCN9A
ENSOCUG00000005673	3	0.365194	0.565225	0.381589	0.58887	1.81898	0.762448	0.865385	0.458268	0.452977	0.503501	0.843638	1.28841	C5
ENSOCUG00000005716	3	0.406971	0.850345	0.467766	1.26642	1.73894	1.72978	1.25727	0.383019	0.72613	1.26381	0.994891	0.748129	SLC28A3
ENSOCUG00000005728	3	0.406478	0.640357	0.345221	1.02998	0.750362	0.865831	0.672721	0.847088	0.700873	0.691948	0.868541	0.978506	GPRIN2
ENSOCUG00000005848	3	0.588201	0.910383	0.271982	2.04392	1.65528	1.74736	1.16727	0.707357	1.54336	2.40715	1.48208	2.76995	MAEL
ENSOCUG00000005904	3	7.50595	16.7805	7.22478	27.9915	32.9672	35.5704	30.0591	25.9021	27.5934	20.9085	18.8934	25.552
ENSOCUG00000005933	3	0.569759	3.12883	0.469007	4.58248	4.62136	4.48432	3.91385	1.8768	2.32296	5.10385	3.70063	2.97653
ENSOCUG00000005944	3	3.7859	12.2252	3.76489	12.9805	13.8048	13.095	12.0282	6.54313	15.7494	16.6285	11.6242	21.3005
ENSOCUG00000005990	3	0.143327	0.190142	0.146073	0.372734	0.444498	0.610595	0.55348	0.443215	0.537244	0.532331	0.464319	0.282295	GASK1A
ENSOCUG00000006025	3	71.0858	67.7817	89.5535	112.183	169.718	155.77	116.83	82.8313	81.7135	89.8404	79.2128	197.051
ENSOCUG00000006084	3	14.9598	19.9672	12.7673	23.3085	44.9937	26.4787	26.6204	21.3889	23.1959	32.0161	30.733	41.2559	CMBL
ENSOCUG00000006175	3	0.600215	1.25412	0.374675	2.18528	1.70633	1.69733	0.796755	0.663747	0.803193	1.23539	0.926717	0.858175	NUTM1
ENSOCUG00000006216	3	48.1183	65.0042	52.652	121.574	114.058	125.72	119.064	99.0255	100.693	86.4037	100.902	137.554
ENSOCUG00000006310	3	6.6731	8.1107	9.33463	36.9381	29.3791	45.7335	42.3299	13.6321	28.5093	25.386	33.3335	43.5361	PPM1J
ENSOCUG00000006338	3	3.8805	7.5075	4.29208	20.4158	18.0363	21.6841	14.143	4.58638	10.1661	8.96132	7.75048	11.6741
ENSOCUG00000006362	3	0.61957	0.632896	0.500943	1.01798	1.81899	0.968412	0.909178	0.909646	0.962398	0.966484	0.645705	0.556819	SLC25A48
ENSOCUG00000006381	3	2.11748	2.74716	0.592406	4.18609	6.95323	4.73913	2.76575	2.579	2.09167	3.10342	1.80294	2.92576	LY86
ENSOCUG00000006421	3	0.349468	0.518348	0.34627	0.761235	1.20422	0.978265	0.693507	0.657801	0.753943	0.988494	0.599521	1.03105	KDF1
ENSOCUG00000006448	3	1.24735	1.79371	1.43885	3.14577	3.90689	4.03945	4.02603	2.31284	2.28613	2.90414	2.65886	3.3273	ABCB9
ENSOCUG00000006551	3	0	0.049009	0.1004	0.630626	0.392809	0.347322	0.366838	0.317881	0.265871	0.274416	0.162966	0.258707	BARX1
ENSOCUG00000006597	3	0.486301	1.41125	0.385481	1.8916	2.09467	2.33366	1.4867	1.09335	1.64461	1.43407	1.48603	1.40716	CLGN
ENSOCUG00000006790	3	1.24423	4.64242	1.10956	6.80333	6.43121	7.03703	5.40541	3.93123	6.62268	7.60574	4.58824	10.0748	DPPA5
ENSOCUG00000006817	3	0.761418	1.39378	1.21873	5.87792	4.35948	5.48085	4.89115	2.26007	3.93425	5.32968	3.4477	5.05449	HORMAD2
ENSOCUG00000006847	3	0.386732	1.10734	0.73573	2.40687	4.10451	1.35212	1.0454	0.825002	1.56945	2.01091	1.5674	1.31653	CHMP4C
ENSOCUG00000006877	3	0.696608	1.46901	0.476261	2.81803	5.41297	3.75478	2.57238	1.37678	2.74172	2.27016	1.76457	1.79042	TFCP2L1
ENSOCUG00000006995	3	0.166197	0.241153	0	1.00849	1.11676	0.726336	1.76494	0.821183	0.915766	0.540114	0.761792	0.933526	RAG2
ENSOCUG00000007086	3	11.1627	13.2903	7.34098	22.617	20.3188	28.0204	21.2389	10.518	13.0008	20.5583	13.0719	12.7037	KIT
ENSOCUG00000007106	3	19.7688	34.5145	22.8393	29.9988	41.7414	49.7515	39.0203	26.6275	31.5845	47.8157	44.7952	72.5425
ENSOCUG00000007350	3	11.057	12.3674	11.8163	25.2204	21.241	32.292	27.5725	13.0605	12.7794	15.7603	16.8471	20.9386	TIMM9
ENSOCUG00000007366	3	0.180677	0.104866	0.0358047	0.50601	0.529204	0.526413	0.814001	0.141703	0.284444	0.652415	0.348701	0.338287	ENDOU
ENSOCUG00000007384	3	1.44167	3.48763	1.41167	6.4805	4.59629	8.13501	3.50877	1.90411	5.65824	5.93197	4.72302	3.05602	RNF17
ENSOCUG00000007386	3	2.81289	2.83248	1.65214	8.60555	3.39835	6.37752	6.08559	4.43351	1.95632	4.40553	4.90553	5.57239
ENSOCUG00000007467	3	1.60254	4.18553	2.16528	4.65812	4.48048	5.61789	2.49648	1.33683	2.33178	2.68291	1.86274	1.97139
ENSOCUG00000007502	3	0.979357	2.15608	1.16447	4.09847	6.98224	5.03544	2.60824	1.3349	2.37476	2.81693	2.50931	3.89729	ELF3
ENSOCUG00000007503	3	0.0611537	0.0709876	0.145426	1.14179	1.26437	0.754624	0.590389	0	0.385103	0.993702	0.118025	0.499636
ENSOCUG00000007510	3	4.90385	6.20487	4.08579	11.3948	11.434	14.8091	14.1452	10.1288	9.96806	11.2449	11.318	7.70111	LRIG1
ENSOCUG00000007612	3	2.10417	3.49249	1.15472	7.20848	7.07683	7.01015	4.83492	2.55382	3.80729	3.45521	2.46231	2.14892	TRIM71
ENSOCUG00000007772	3	0.0284645	0.0220278	0.0112816	2.39156	1.69688	2.06844	1.29156	0.660802	0.497914	0.832547	0.833188	0.610468	TMC3
ENSOCUG00000007985	3	42.6054	48.8187	40.286	71.6125	79.3005	103.057	89.1276	67.7997	68.0029	73.9464	70.5608	63.7855	STC2
ENSOCUG00000008015	3	0.129365	0.100111	0.153817	0.704477	1.56021	0.775994	0.77016	0.54788	0.135774	1.89187	1.10271	1.07895
ENSOCUG00000008031	3	10.2719	15.9316	9.5792	26.807	25.3422	36.511	29.1111	8.85499	14.6463	16.1768	15.021	14.046	ETV4
ENSOCUG00000008086	3	0.184915	0.515162	0.219868	1.89889	2.25568	1.40712	2.24936	0.661324	1.08683	1.60252	0.856513	0.679855	LRRC15
ENSOCUG00000008178	3	0.0365834	0.169865	0.0434983	13.2169	10.9674	10.1948	10.101	5.99088	7.10327	2.02114	4.16568	2.76475	PNLIPRP1
ENSOCUG00000008181	3	10.4486	8.92357	6.5289	22.5841	30.8796	19.8111	15.8124	17.3344	17.388	17.8789	14.4125	17.8168
ENSOCUG00000008197	3	0.133783	0.221851	0.136346	2.83683	3.65507	5.09012	6.36555	2.41026	3.34981	2.4016	2.69262	1.01495	PCDH8
ENSOCUG00000008291	3	5.25473	6.7692	3.54306	8.22572	11.4274	9.58794	7.42391	5.91044	6.3558	7.49725	7.51333	8.01702	BIN2
ENSOCUG00000008330	3	54.6104	88.0944	65.4839	162.282	142.454	149.129	140.38	119.949	122.821	117.355	141.696	182.147
ENSOCUG00000008418	3	2.35495	4.32719	1.83133	6.512	4.97278	6.17459	4.97802	3.03567	4.01787	5.27142	4.24342	3.76144	B4GALNT3
ENSOCUG00000008435	3	1.38074	1.65447	1.1651	3.24324	2.30219	3.43508	4.55796	3.56309	2.89831	2.79846	2.36392	2.82022	KCNF1
ENSOCUG00000008484	3	0	0.834044	0.31066	1.46347	1.75563	1.61203	0.567537	0.184423	0.95977	0.566068	0.441219	0.400248
[truncated: 1,462 more rows]
